# Supplementary material for: Modified Benzoxazole-Based VEGFR-2 Inhibitors and Apoptosis Inducers: Design, Synthesis, and Anti-Proliferative Evaluation
Source: MDPI journal article supplement (doi:10.3390/molecules27155047), 2022-08-08
Supplement: s1 [file s1]

## **Modified Benzoxazole Based VEGFR-2 Inhibitors and apoptosis inducers: Design, Synthesis, and anti-proliferative Evaluation**

Alaa Elwan<sup>a</sup>, Abdallah E. Abdallah<sup>a</sup>, Hazem A. Mahdy<sup>a</sup>, Mohammed A. Dahab<sup>a</sup>, Mohammed S. Taghour<sup>\*a</sup>, Eslam B. Elkaeed<sup>b</sup>, Ahmed B. M. Mehany<sup>c</sup>, Ahmed Nabeeh<sup>c</sup>, Mohammed Adel<sup>c</sup>, Aisha A. Alsouk<sup>d</sup>, Hazem, Elkady<sup>a</sup>, Ibrahim H. Eissa<sup>\*a</sup>,

<sup>a</sup> Pharmaceutical Medicinal Chemistry & Drug Design Department, Faculty of Pharmacy (Boys), Al-Azhar University, Cairo 11884, Egypt.

<sup>b</sup> Department of Pharmaceutical Sciences, College of Pharmacy, AlMaarefa University, Riyadh 13713, Saudi Arabia.

<sup>c</sup> Zoology Department, Faculty of Science (Boys), Al-Azhar University, Cairo 11884, Egypt.

<sup>d</sup> Department of Pharmaceutical Sciences, College of Pharmacy, Princess Nourah bint Abdulrahman University, P.O. Box 84428, Riyadh 11671, Saudi Arabia.

### **\* Corresponding authors:**

**Ibrahim H. Eissa**

Pharmaceutical Medicinal Chemistry & Drug Design Department, Faculty of Pharmacy (Boys), Al-Azhar University, Cairo 11884, Egypt

**Email:** [Ibrahimeissa@azhar.edu.eg](mailto:Ibrahimeissa@azhar.edu.eg)

**Mohammed S. Taghour**

Pharmaceutical Medicinal Chemistry & Drug Design Department, Faculty of Pharmacy (Boys), Al-Azhar University, Cairo 11884, Egypt

**Email:** [Mohammad1533.el@azhar.edu.eg](mailto:Mohammad1533.el@azhar.edu.eg)

## Content

|          |                                                                                                                                                                                                                                                                                                     |
|----------|-----------------------------------------------------------------------------------------------------------------------------------------------------------------------------------------------------------------------------------------------------------------------------------------------------|
| <b>1</b> | <b>Experimental of Biological testing</b><br><i>1.1. In vitro</i> antitumor assay<br><i>1.2. In vitro</i> VEGFR-2 kinase inhibitory assay<br>1.3. Cell cycle analysis<br>1.4. Flow cytometry analysis for apoptosis and necrosis<br>1.5. Quantitative Real Time Reverse-Transcriptase PCR technique |
| <b>2</b> | <b>Experimental of Docking studies</b>                                                                                                                                                                                                                                                              |
| <b>3</b> | <b>Chemistry and materials</b>                                                                                                                                                                                                                                                                      |
| <b>4</b> | <b>Spectral data of final target compounds 8a-m</b>                                                                                                                                                                                                                                                 |

## **1- Experimental of biological testing**

### **1.1. *In vitro* antitumor assay**

This test was carried out on three different human cancer cell lines: MCF-7, HCT116, and HepG2. We performed this colorimetric experiment with quantitative assessment of anticancer activity in accordance with the MTT method [1]. The assay is based primarily on a biochemical reaction in which mitochondrial succinate dehydrogenase transforms yellow tetrazolium bromide (MTT) to a purple formazan derivative in live cells. The cells were grown in RPMI-1640 media with 10% foetal bovine serum in general. In a 5 percent CO<sub>2</sub> incubator at 37 °C, penicillin (100 units/mL) and streptomycin (100g/mL) were introduced. The cells were seeded at a density of 1.0x10<sup>4</sup> cells/well in a 96-well plate at 37 °C for 48 hours under 5% CO<sub>2</sub>. Following the initial incubation period, the cells were given varying concentrations of the novel compounds and cultured for 24 hours. Then we add 20  $\mu$ l of MTT in a 5 mg/ml solution and let it sit for 4 hours. 100  $\mu$ l of DMSO was applied to each well to dissolve the purple formazan produced. A plate reader (EXL 800, USA) was used to measure and record the colorimetric test at a wavelength of 570 nm. The 50% inhibitory concentration (IC<sub>50</sub>) was estimated from graphic plots of the dose response curve for each conc. using Graphpad Prism software (San Diego, CA, USA). The data presented are the mean of at least three separate experiments.

### **1.2. *In vitro* VEGFR-2 kinase inhibitory assay**

The IC<sub>50</sub> of the selected derivatives were determined against VEGFR-2 kinase with enzyme linked immunosorbent assay (ELISA). We used a human VEGFR-2 ELISA kit. VEGFR-2 specific antibody was seeded on a 96 well microplate and 100  $\mu$ L of solution of the standard or the tested compound was added. After incubation for 2.5 h. at room temperature and washing, 100  $\mu$ L of prepared biotin antibody was added. Incubation of the plates for 1 h at room temperature and then washing were carried out before addition of streptavidin solution (100  $\mu$ L). The mixture was incubated for 1h at room temperature and then washed. After that, 100  $\mu$ L of tetramethylbenzidine (TMB) substrate solution was added before incubation for half an hour at room temperature. Finally, 50  $\mu$ L of the stop solution was added immediately before the reading at 450 nm. The standard curve was hence drawn, concentration was on the X-axis and the absorbance was on the Y-axis. Percent inhibition was calculated by the comparison of compounds treated to control incubations. The concentration of the test compound causing 50% inhibition (IC<sub>50</sub>) was calculated

from the concentration–inhibition response curve (triplicate determinations) and the data were compared with Sorafenib as standard VEGFR-2 inhibitor.

### **1.3. Cell cycle analysis**

HepG2 cells were cultured according to the methodology described by Wang et al [2]. The cells were planted and cultured for 24 h in six-well plates. Each well had  $2 \times 10^5$  cells in it. Then 10% fetal bovine serum (FBS) was added, and the cells were incubated at 37 °C with 5% CO<sub>2</sub>. The medium was then changed. DMSO (1% v/v) containing 2.43 μM of compound **8d** was substituted. Following that, the cells were rinsed in cold phosphate buffered saline. (PBS), then fixed in 70% ethyl alcohol, washed in PBS, and dyed with. After that, the DNA fluorochrome propidium iodide (PI) was maintained at room temperature for 15 minutes at 37 °C. A FACS Caliber flow cytometer was used to analyze the samples.

### **1.4. The effect of 8d on apoptosis and necrosis rates of HepG2**

The apoptosis and necrosis ratios of HepG2 cells treated with 2.43 μM of compound **8d** compared to untreated HepG2 cells was calculated using the Annexin V fluorescein isothiocyanate (V-FITC)/PI kit, according to the published technique [3].

### **1.5. Quantitative Real Time Reverse-Transcriptase PCR (qRT-PCR) technique**

The effects of compound **8d** on the expression of TNF-α and IL-6 were determined using qRT-PCR technique [4, 5]. The quantity of immunomodulatory proteins (TNF-α and IL-6) in control and compound **8d** (at the IC<sub>50</sub> concentration)-treated HepG2 cells was assessed by qRT-PCR (reference). Total RNA from vehicle-treated control (0.01% DMSO) and 10k-treated HepG2 cells were extracted as-per the manufacturer instructions (RNeasy mini kit, Qiagen, Germany). After RNA extraction, cDNA was prepared using the Revert Aid First Strand cDNA Synthesis kit (Thermo Scientific, USA). Amplification of target cDNA for apoptosis markers and GAPDH [as a normalization (housekeeping) gene] was done using one-step RT-PCR SYBR® Green kit Master Mix (Bio-Rad Laboratories, USA) on Rotor-Gene Q real-time PCR thermal cycler instrument. cDNA (2 μl aliquots) was mixed with 1 μl of forward primer, 1 μl reverse primer, 10 μl master mixture, and the reaction volume was completed to 20 μl with nuclease-free water. All experiments were performed in triplicates



## 2. Experimental of Molecular docking

**Protein Preparation:** The crystal structure of VEGFR-2 (PDB ID: 4ASD, resolution: 2.03 Å) was obtained from Protein Data Bank (<https://www.rcsb.org>). At first, the crystal structure of the VEGFR-2 complexed with the sorafenib ligand was prepared by removing crystallographic water molecules. Only one chain was retained besides the co-crystallized ligand (sorafenib). The selected protein chain was protonated using the following setting. The used electrostatic functional form was GB/VI with a distance cut-off of 15 Å. The used value of the dielectric constant was 2 with an 80 dielectric constant of the used solvent. The used Van der Waals functional form was 800R3 with a distance cut-off of 10 Å. Then, the energy of the protein chain was minimized using Hamiltonian AM1 implanted in Molecular Operating Environment (MOE 2014 and MMFF94x (Merck molecular force field) for structural optimization. Next, the active site of the target protein was defined for ligand docking and redocking (in case of validation of docking protocol). The active site of the protein was identified as the residues that fall within the 5 Å distance from the perimeter of the co-crystallized ligand.

**Ligand Preparation:** 2D structures of the synthesized compounds and the standard compound, sorafenib were drawn using ChemBioDraw Ultra 14.0 and saved in MDL-SD file format. The 3D structures of the ligands were protonated, and the structures were optimized by energy minimization using MM2 force-field and 10000 iteration steps of 2 fs. The conformationally optimized ligands were used for docking studies.

**Docking Setup and Validation of Docking Protocol:** The protein-ligand docking studies were carried out using MOE version 2014. Validation of the docking protocol was carried out by redocking the co-crystallized reference ligand (sorafenib) against the isolated pocket of VEGFR-2. The docking protocol was validated by comparing the heavy atoms RMSD value of the redocked ligand pose with the corresponding co-crystallized reference ligand structure.

The docking setup for the tested compounds was established according to the protocol followed in the validation step. For each docking run, 30 docked solutions were generated using ASE for scoring function and rigid receptor for refinement. The pose with ideal binding mode was selected for further investigations. The docking results were visualized using Discovery Studio (DS) 4.0.

Analysis of the docking results was carried out by comparing the interactions and docking score obtained for the docked ligands with that of the re-docked reference molecule (sorafenib).

### **3- Chemistry and material**

All melting points were carried out by open capillary method on a Gallen kamp Melting point apparatus. The infrared spectra were recorded on pye Unicam SP 1000 IR spectrophotometer using potassium bromide disc technique. Proton magnetic resonance  $^1\text{H}$ NMR spectra were recorded on a Bruker 400 Megahertz-nuclear magnetic resonance (400 MHZ-NMR) spectrophotometer. Carbon-13 ( $\text{C}13$ ) nuclear magnetic resonance ( $^{13}\text{C}$ NMR) spectra were recorded on a Bruker 100 Megahertz-nuclear magnetic resonance (100 MHZ-NMR) spectrophotometer. Tetramethylsilane (TMS) was used as internal standard and chemical shifts were measured in  $\delta$  scale one part per million (ppm). All compounds were within  $\pm 0.4$  of the theoretical values. The reactions were monitored by thin-layer chromatography (TLC) using TLC sheets precoated with UV fluorescent silica gel Merck 60 F254 plates and were visualized using ultraviolet (UV) lamp and different solvents as mobile phases.

#### **4- Spectral data of the final target compounds 8a-m**

The  $^1\text{H}$  NMR and  $^{13}\text{C}$  NMR analyses were carried out at 400 and 100 MHz, respectively in  $\text{DMSO-d}_6$  as a solvent. the chemical shifts were presented as ppm. The infra-red analyses were carried out using KBr disc and the results were presented as  $\text{cm}^{-1}$ .

# IR of compound 8a

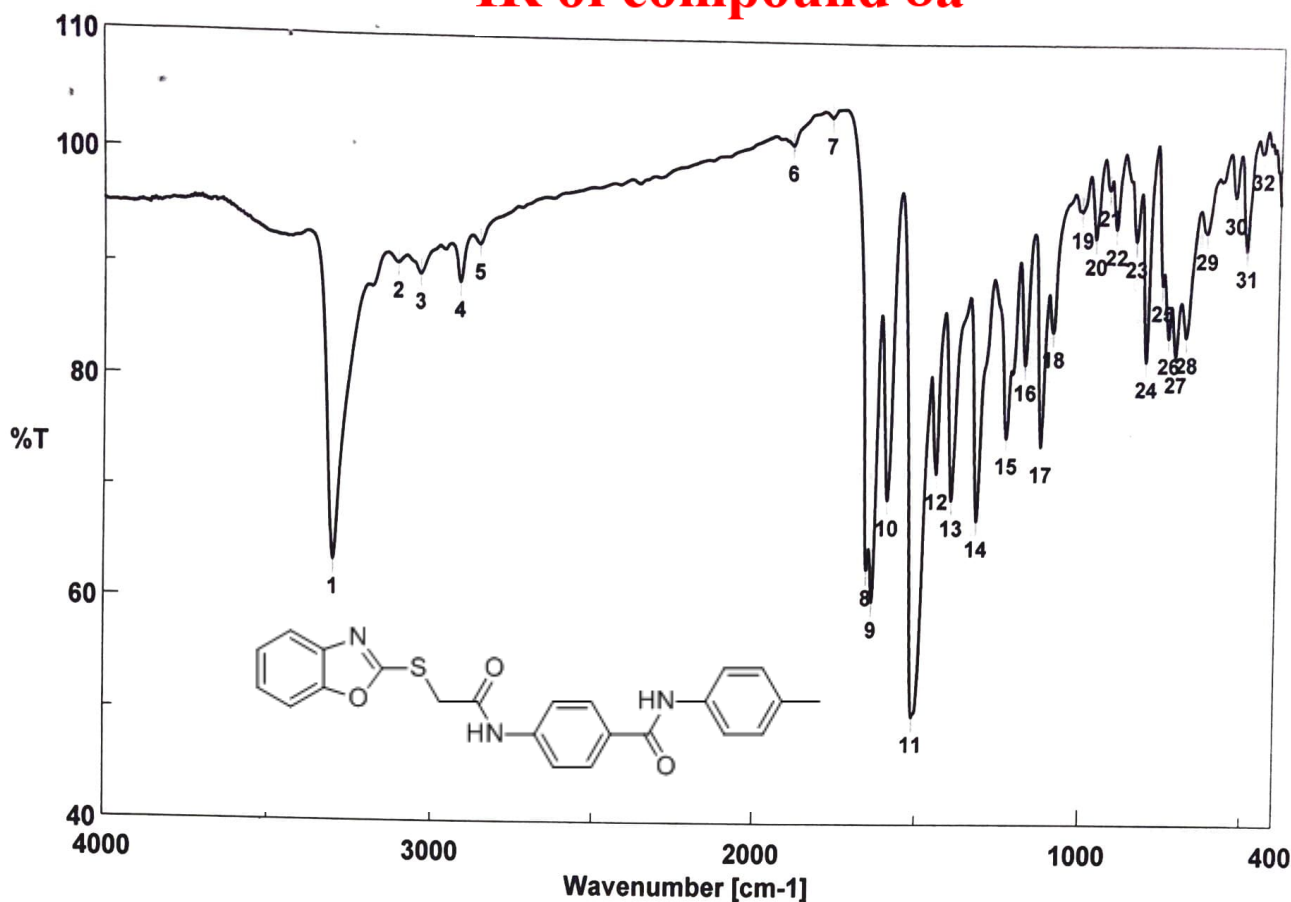

Accumulation 16  
Resolution 4 cm-1  
Zero Filling ON  
Apodization Cosine  
Gain Auto (2)  
Scanning Speed Auto (2 mm/sec)  
Date/Time 8/22/2021 1:49PM  
Update 8/22/2021 1:51PM  
Operator IR  
File Name Memory#86  
Sample Name PBA - 18  
Comment

| No. | cm-1    | %T      | No. | cm-1    | %T      | No. | cm-1    | %T      |
|-----|---------|---------|-----|---------|---------|-----|---------|---------|
| 1   | 3300.57 | 63.4187 | 2   | 3106.76 | 90.0489 | 3   | 3037.34 | 89.0764 |
| 4   | 2915.84 | 88.3828 | 5   | 2856.06 | 91.7794 | 6   | 1897.61 | 100.93  |
| 7   | 1779.01 | 103.47  | 8   | 1660.41 | 62.9335 | 9   | 1643.05 | 60.0638 |
| 10  | 1599.66 | 69.2003 | 11  | 1513.85 | 49.7418 | 12  | 1450.21 | 71.5883 |
| 13  | 1403.92 | 69.1881 | 14  | 1326.79 | 67.3562 | 15  | 1239.04 | 74.8488 |
| 16  | 1182.15 | 81.4761 | 17  | 1132.01 | 74.1269 | 18  | 1097.3  | 84.5069 |
| 19  | 1010.52 | 95.3307 | 20  | 968.09  | 92.9485 | 21  | 927.593 | 97.3225 |
| 22  | 905.415 | 93.839  | 23  | 842.74  | 92.7876 | 24  | 808.992 | 81.9249 |
| 25  | 760.78  | 88.8558 | 26  | 740.531 | 84.0659 | 27  | 718.354 | 82.401  |
| 28  | 685.57  | 84.2021 | 29  | 624.823 | 93.5813 | 30  | 538.042 | 96.7776 |
| 31  | 501.401 | 92.0609 | 32  | 457.047 | 100.743 |     |         |         |

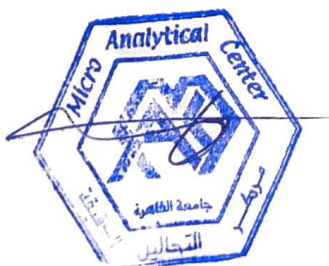

Handwritten signature and date: 8/22/2021

# <sup>1</sup>H NMR of compound 8a

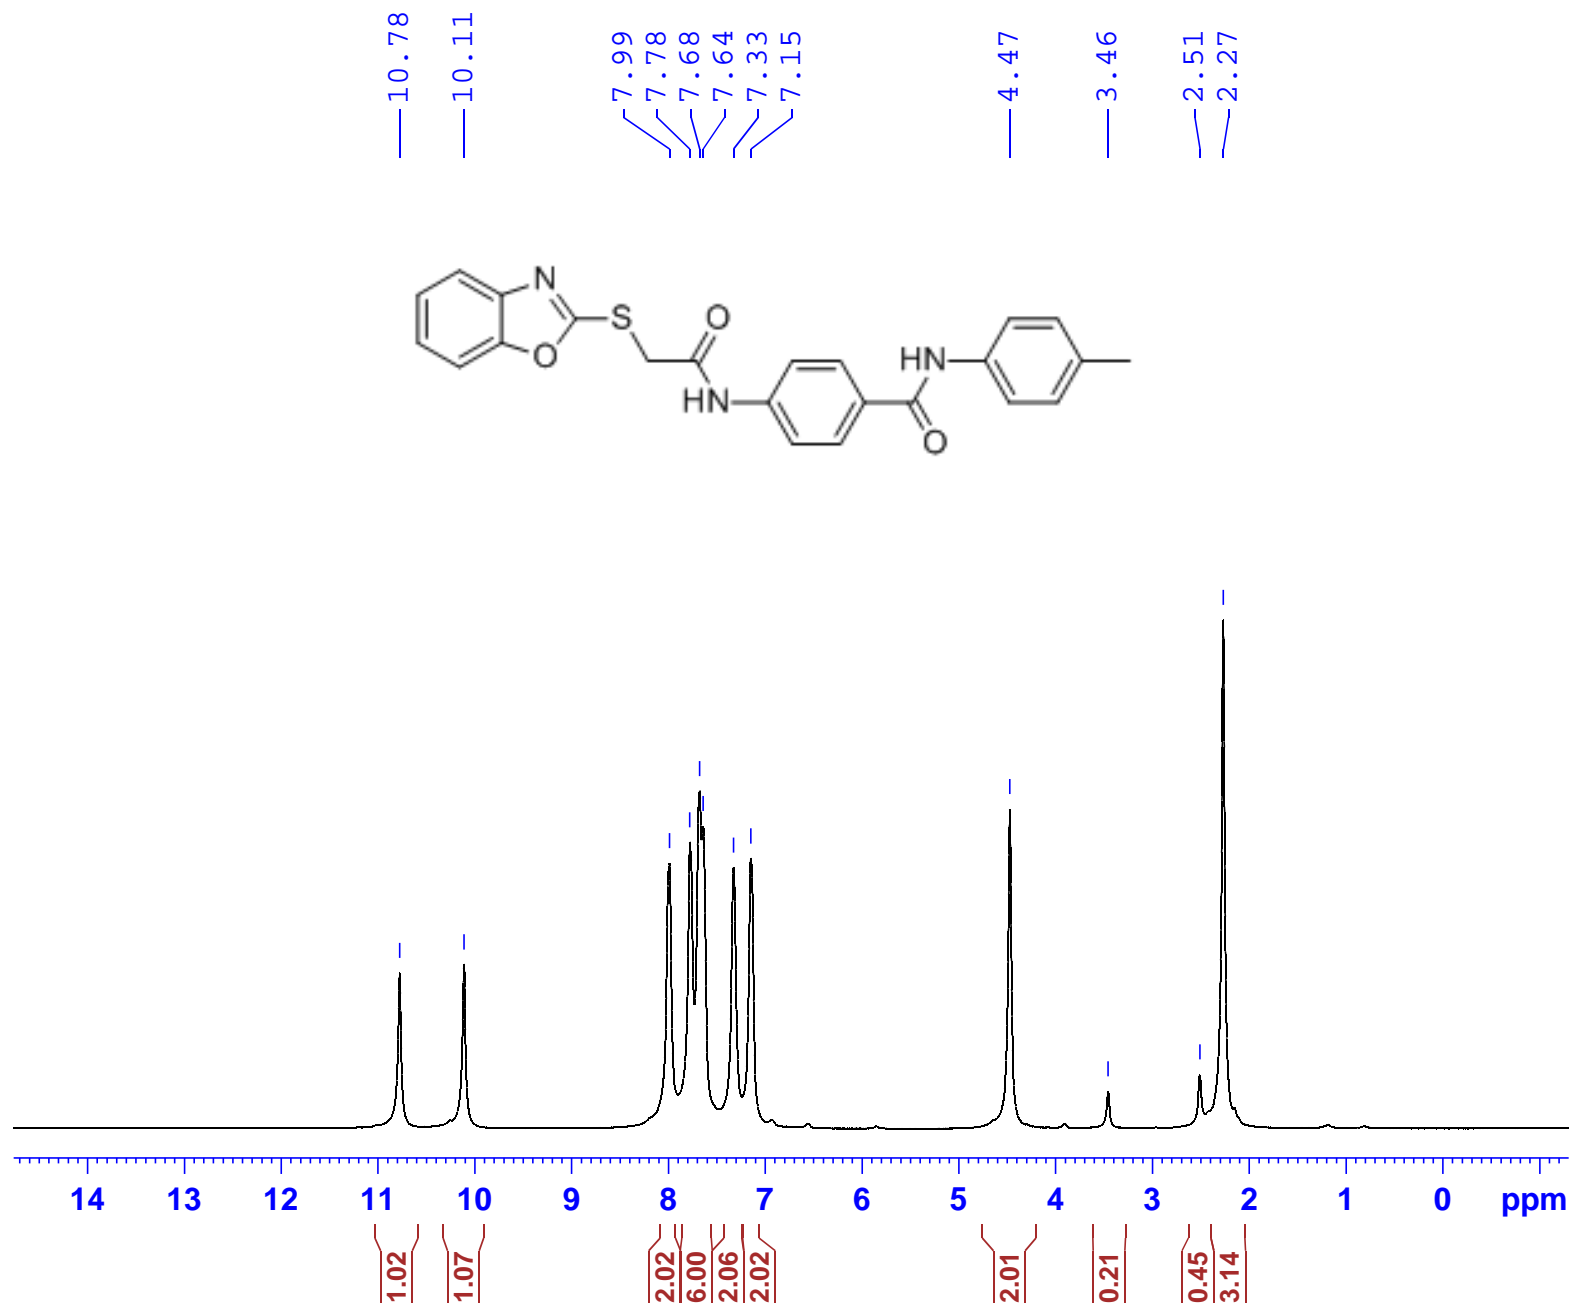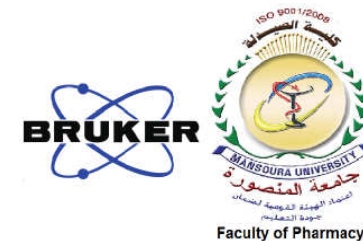

Current Data Parameters  
 NAME ebrahim essa -CBA18-RR-hnmr  
 EXPNO 10  
 PROCNO 1

F2 - Acquisition Parameters  
 Date\_ 20220110  
 Time 11.51 h  
 INSTRUM spect  
 PROBHD Z108618\_0945  
 PULPROG zg30  
 TD 65536  
 SOLVENT DMSO  
 NS 16  
 DS 2  
 SWH 8012.820 Hz  
 FIDRES 0.244532 Hz  
 AQ 4.0894465 sec  
 RG 30.59  
 DW 62.400 usec  
 DE 6.50 usec  
 TE 295.0 K  
 D1 1.00000000 sec  
 TD0 1  
 SFO1 400.2024712 MHz  
 NUC1 1H  
 P1 13.50 usec  
 PLW1 13.00000000 W

F2 - Processing parameters  
 SI 65536  
 SF 400.2000000 MHz  
 WDW EM  
 SSB 0  
 LB 0.30 Hz  
 GB 0  
 PC 1.00

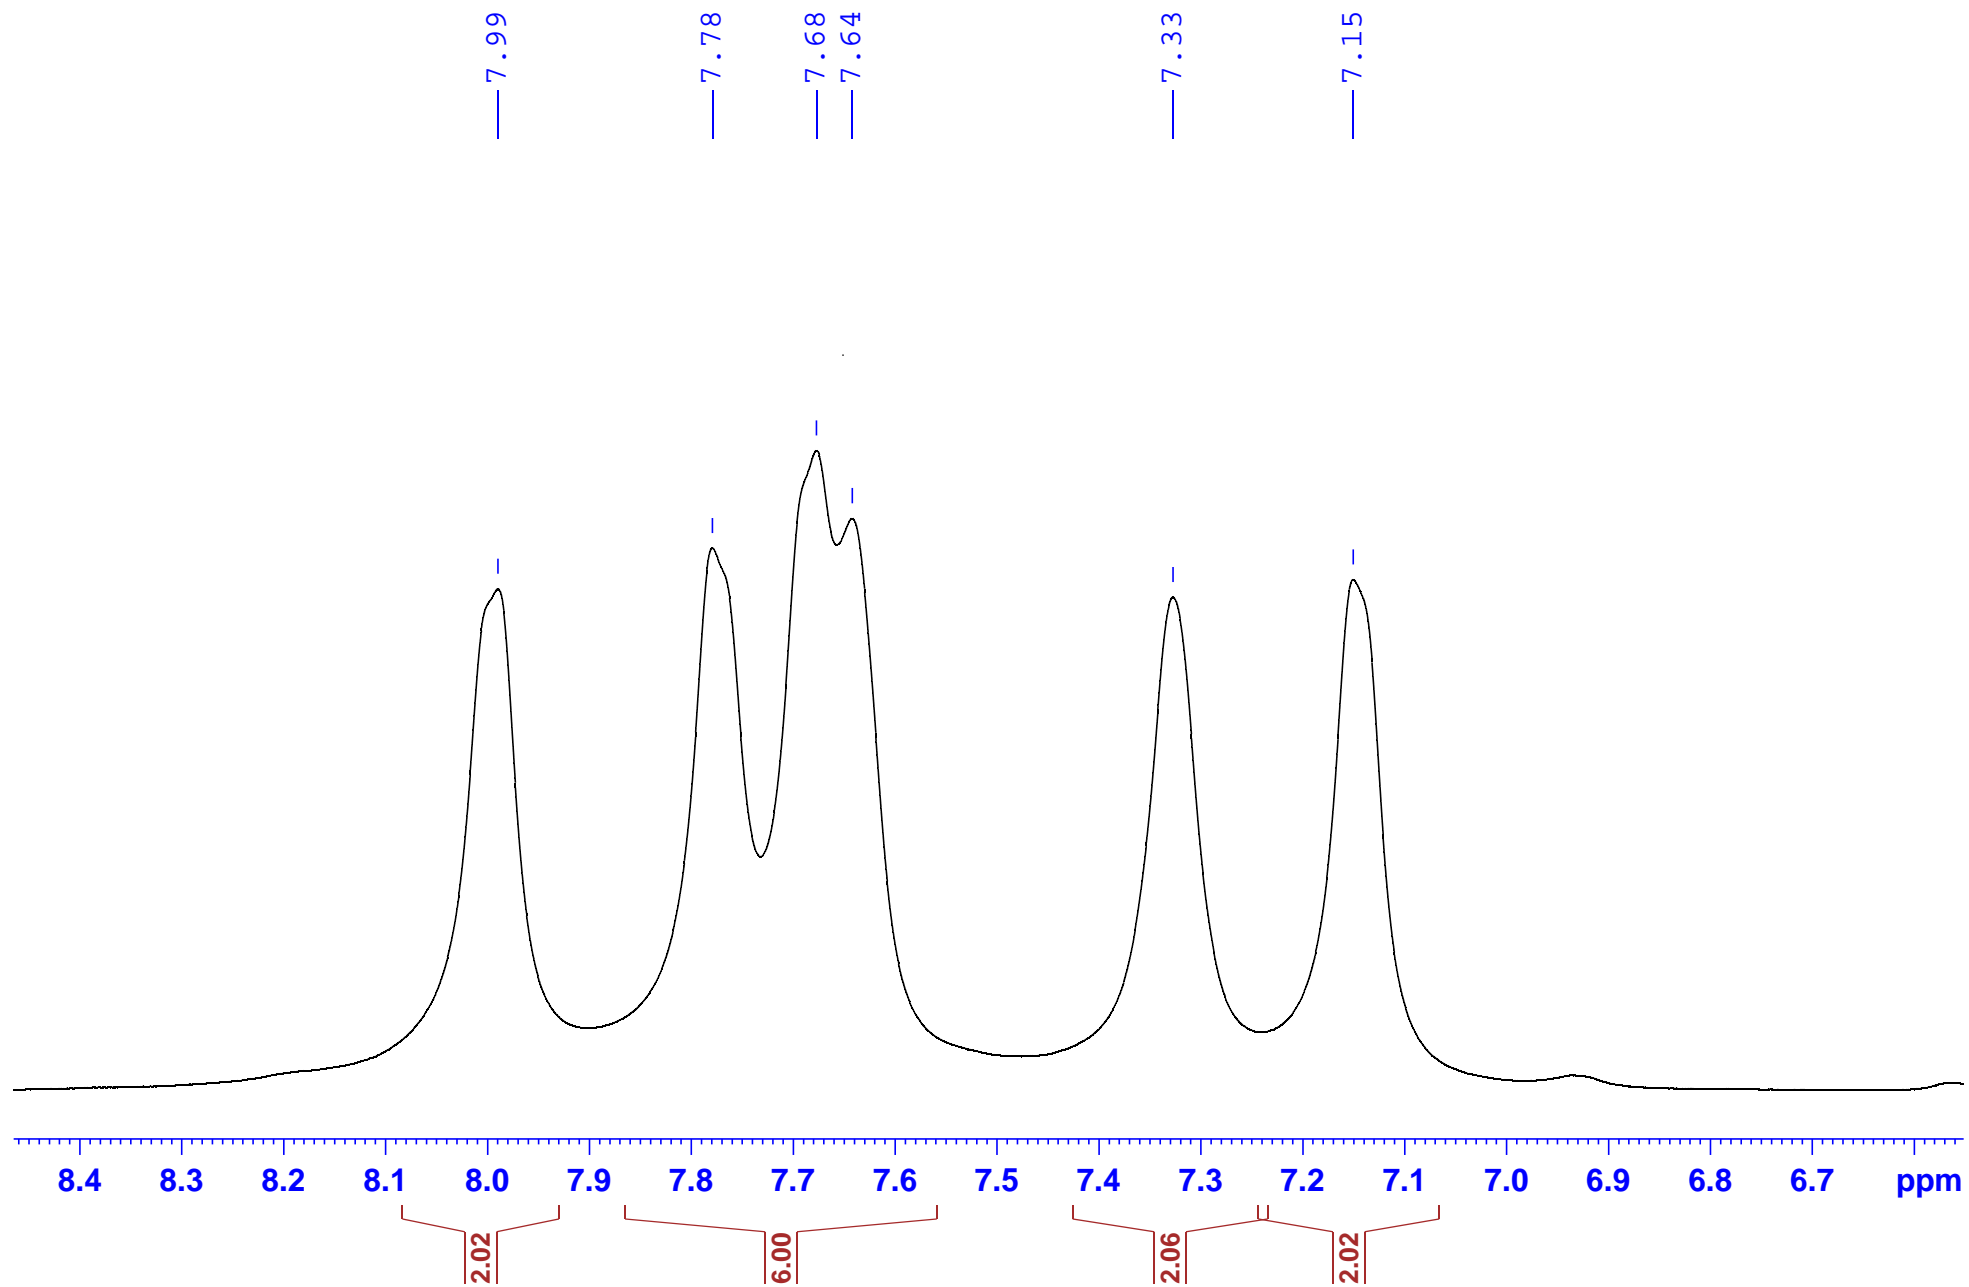

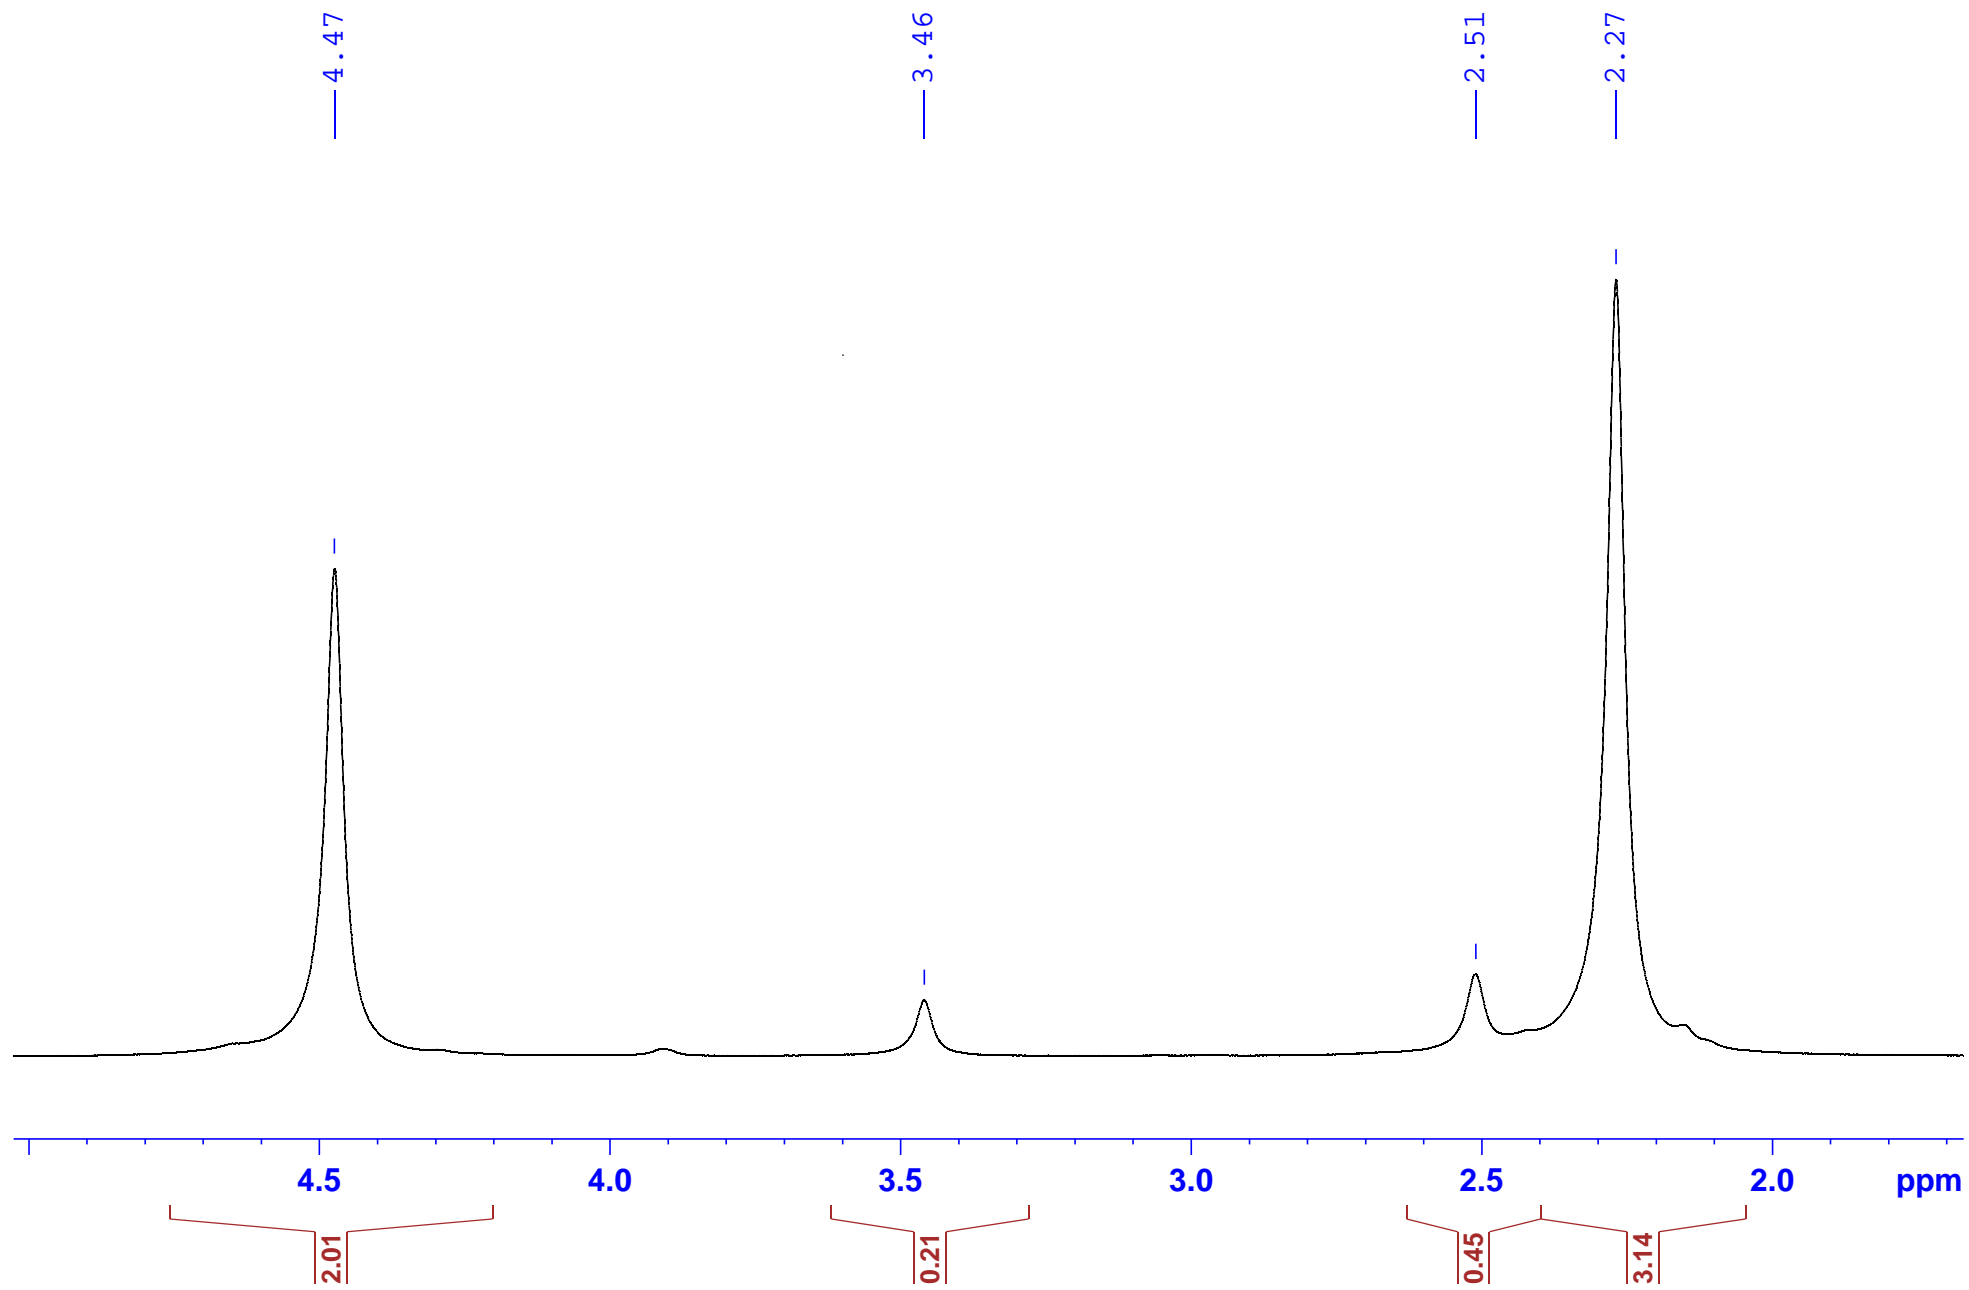

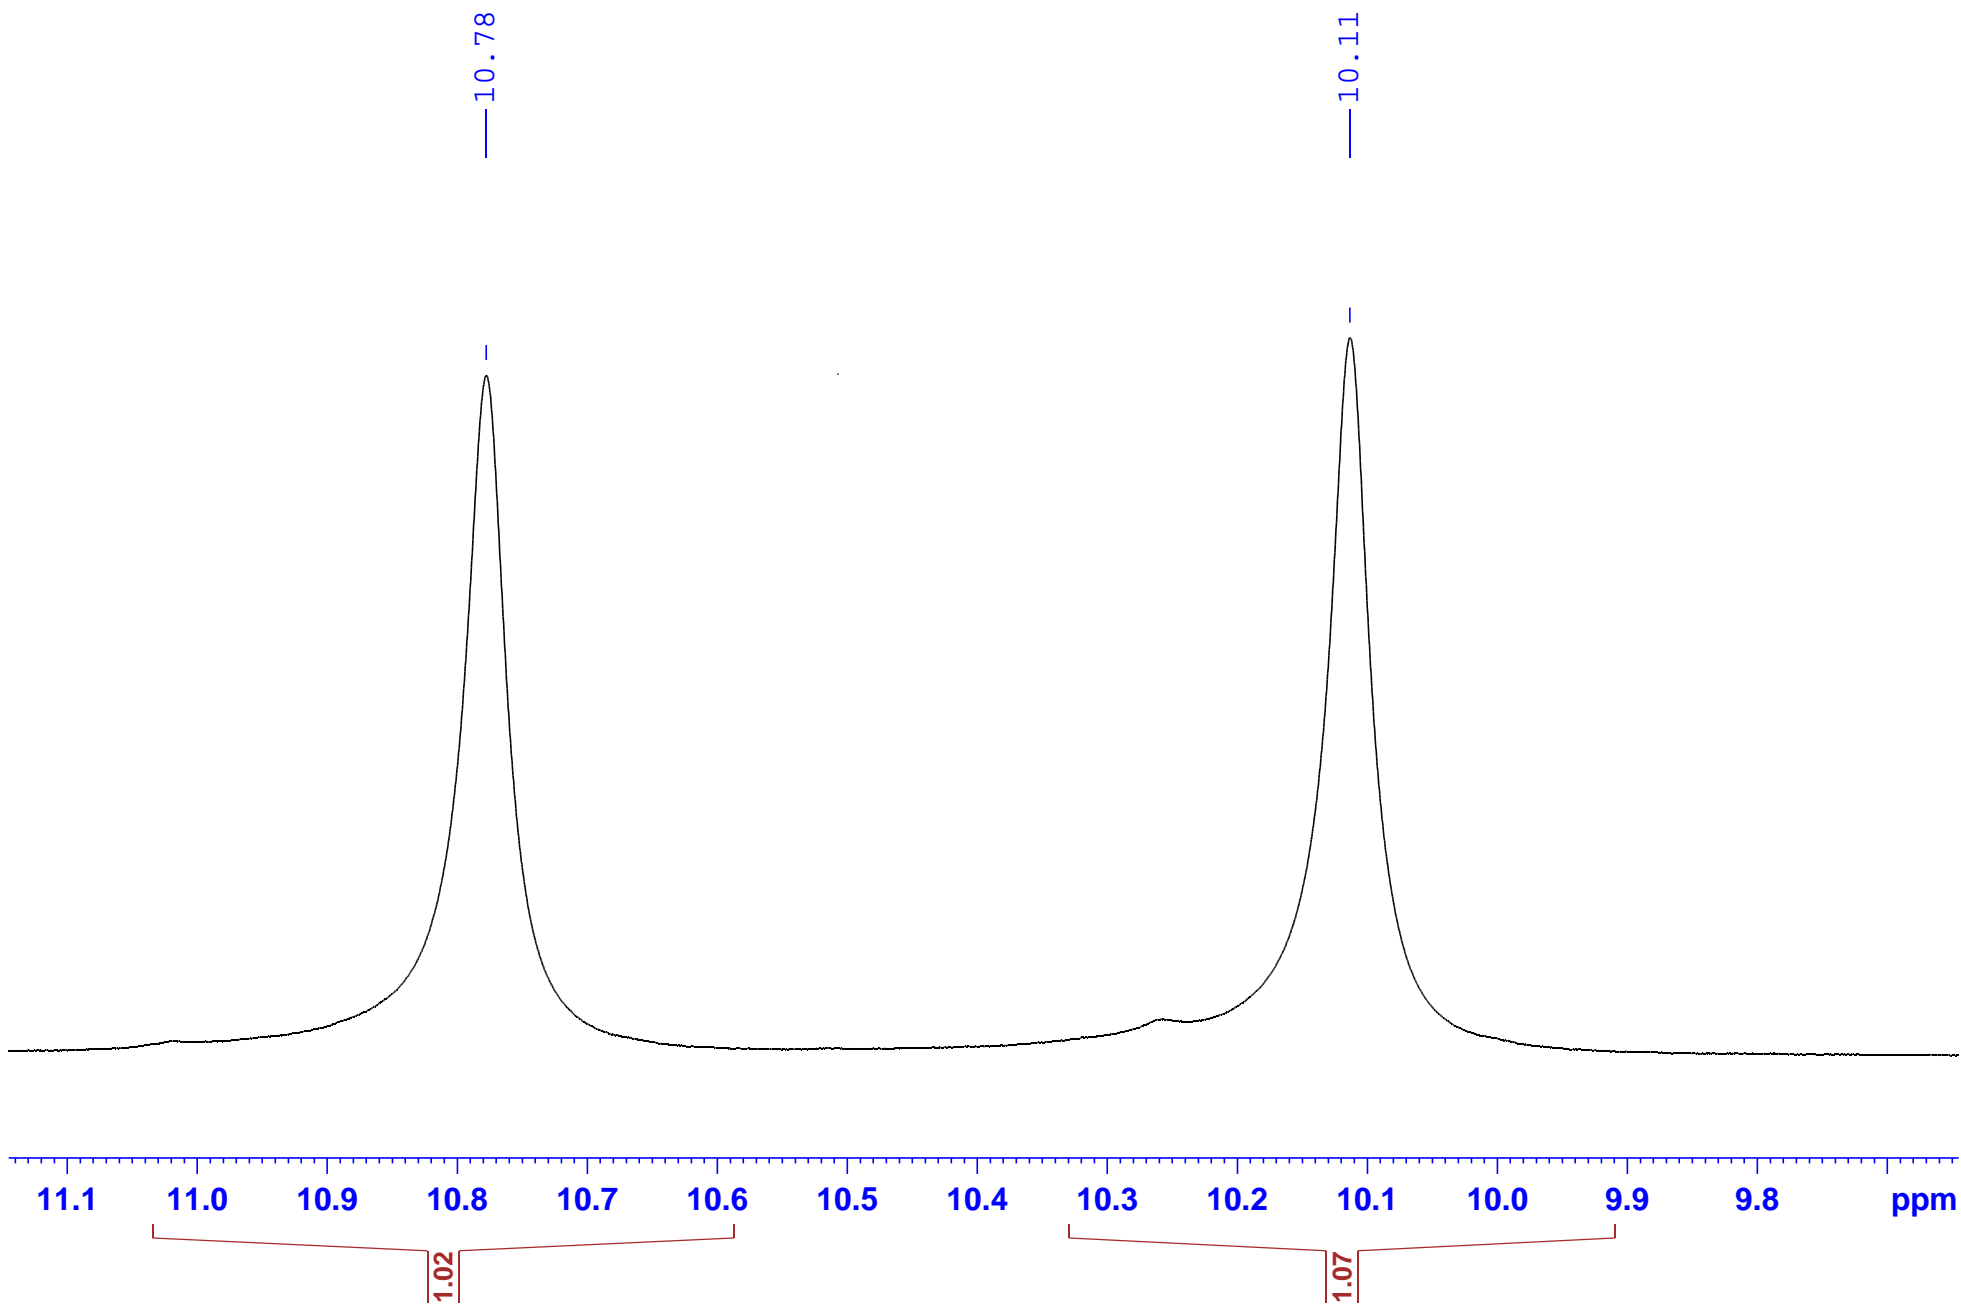



# Cairo University Micro Analytical Center

## DI Analysis Shimadzu Qp-2010 Plus

## Sample Information

Analyzed by : Dr. Mai Younis  
 Analyzed : 01/01/2007 10:21:09  
 Sample Name : 14  
 Sample ID :  
 Customer Name : Dr. Radwan Saeed - Pharmacy - Helwan  
 Data File : C:\GCMSsolution\Data\Project1\14.QGD  
 Org Data File : C:\GCMSsolution\Data\Project1\14.QGD  
 Method File : C:\GCMSsolution\Data\Project1\High Temperature Op  
 Org Method File : C:\GCMSsolution\Data\Project1\High Temperature Op  
 Report File :  
 Tuning File : C:\GCMSsolution\System\Tune1\_default.qgt  
 \$Endl\$Modified by : Dr. Mai Younis  
 Modified : 01/01/2007 10:24:36

## Method

Analytical Line 1  
 IonSourceTemp : 250.00 °C  
 [MS Table]  
 --Group 1 - Event 1--  
 Start Time : 0.00min  
 End Time : 10.00min  
 ACQ Mode : Scan  
 Event Time : 0.50sec  
 Scan Speed : 1250  
 Start m/z : 50.00  
 End m/z : 600.00

Electron Voltage : 70 eV  
 Ionization Mode : EI

C:\GCMSsolution\Data\Project1\14.QGD

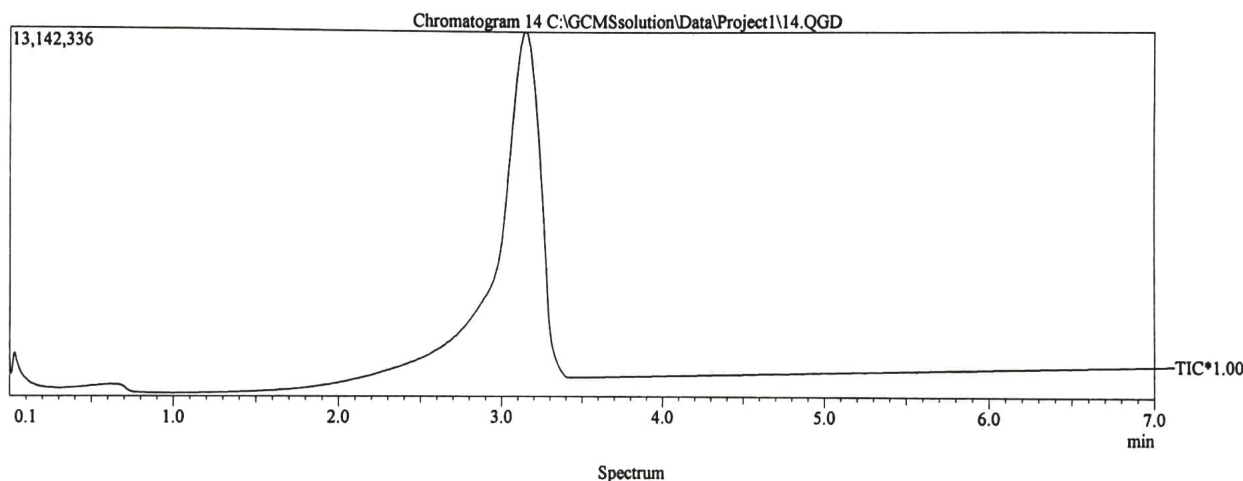

Line#:1 R.Time:3.1(Scan#:377)

MassPeaks:323

RawMode:Single 3.1(377) BasePeak:120(1951293)

BG Mode:None Group 1 - Event 1

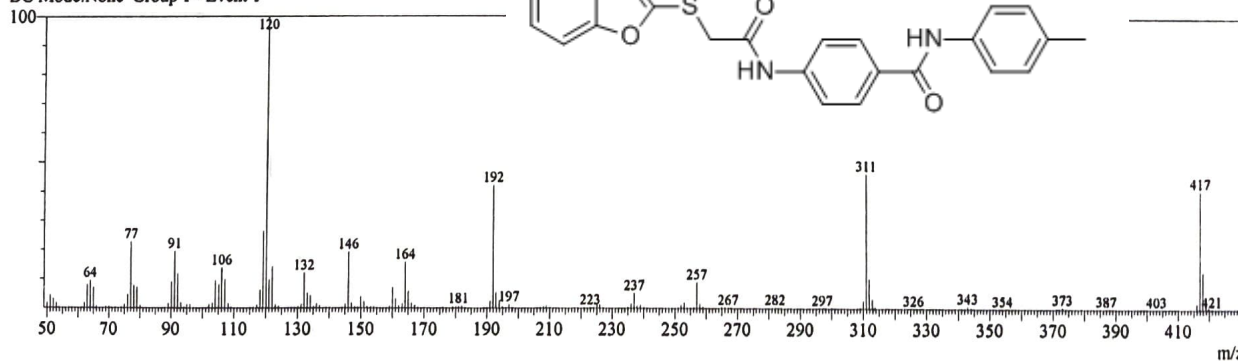

## Mass Table

Line#:1 R.Time:3.1(Scan#:377)

MassPeaks:323

RawMode:Single 3.1(377) BasePeak:120(1951293)

BG Mode:None Group 1 - Event 1

| # | m/z   | Abs. In | Rel. Int. | # | m/z   | Abs. In | Rel. Int. | # | m/z   | Abs. In | Rel. Int. |
|---|-------|---------|-----------|---|-------|---------|-----------|---|-------|---------|-----------|
| 1 | 50.05 | 35976   | 1.84      | 4 | 53.00 | 35545   | 1.82      | 7 | 56.05 | 2316    | 0.12      |
| 2 | 51.00 | 84463   | 4.33      | 5 | 53.95 | 8130    | 0.42      | 8 | 57.05 | 4663    | 0.24      |
| 3 | 52.00 | 61689   | 3.16      | 6 | 55.00 | 4894    | 0.25      | 9 | 57.95 | 6500    | 0.33      |

# IR of compound 8b

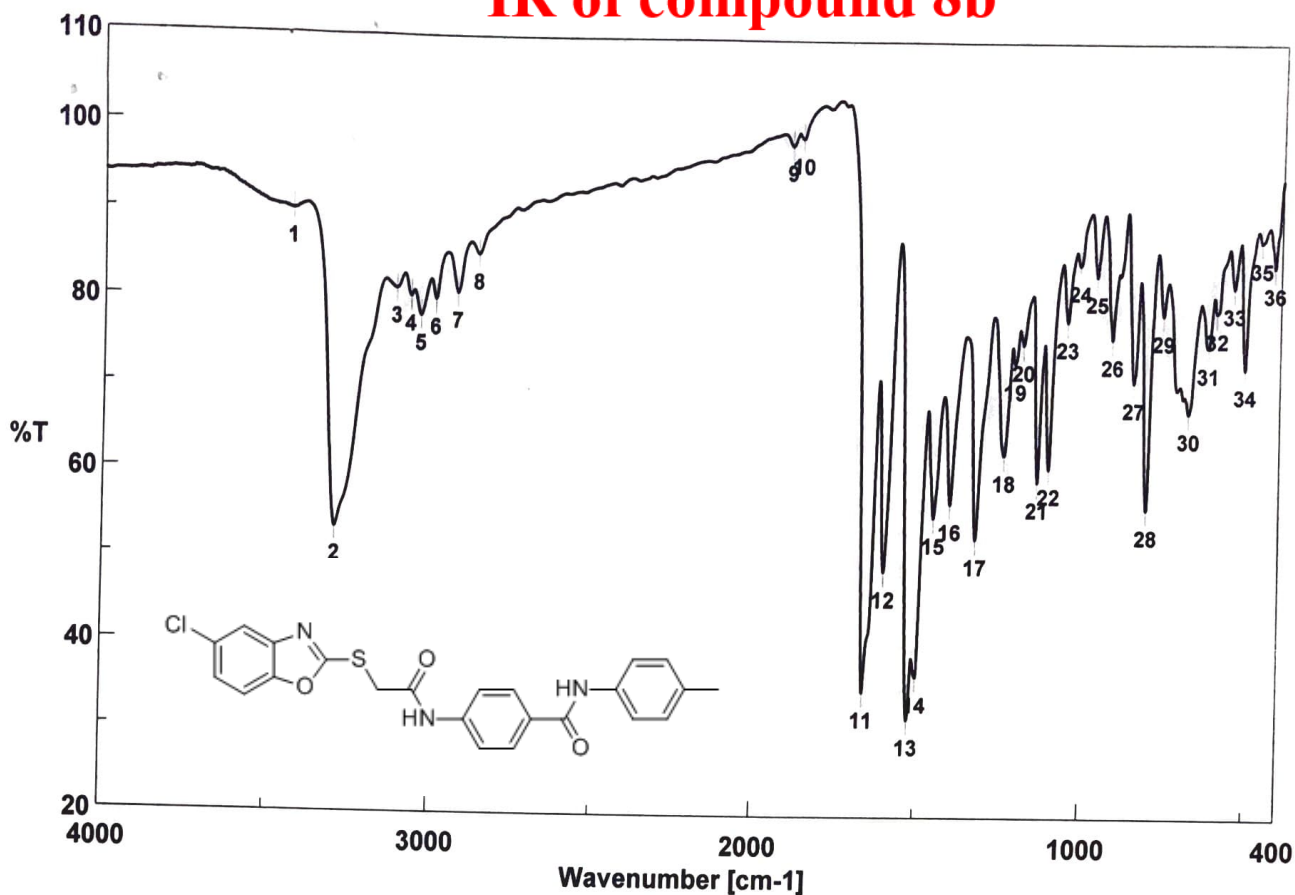

Accumulation 16  
Resolution 4 cm-1  
Zero Filling ON  
Apodization Cosine  
Gain Auto (2)  
Scanning Speed Auto (2 mm/sec)  
Date/Time 8/22/2021 1:54PM  
Update 8/22/2021 1:55PM  
Operator IR  
File Name Memory#97  
Sample Name CBA-18  
Comment

| No. | cm-1    | %T      | No. | cm-1    | %T      | No. | cm-1    | %T      |
|-----|---------|---------|-----|---------|---------|-----|---------|---------|
| 1   | 3426.89 | 89.9947 | 2   | 3289.96 | 53.1849 | 3   | 3108.69 | 80.8308 |
| 4   | 3064.33 | 79.9057 | 5   | 3033.48 | 77.684  | 6   | 2988.16 | 79.5518 |
| 7   | 2921.63 | 80.3447 | 8   | 2857.99 | 84.8216 | 9   | 1900.5  | 97.873  |
| 10  | 1868.68 | 98.7061 | 11  | 1660.41 | 34.6439 | 12  | 1602.56 | 48.6073 |
| 13  | 1523.49 | 31.4702 | 14  | 1500.35 | 36.4181 | 15  | 1454.06 | 54.8328 |
| 16  | 1404.89 | 56.4635 | 17  | 1325.82 | 52.3762 | 18  | 1242.9  | 62.123  |
| 19  | 1213.01 | 72.7917 | 20  | 1187.94 | 75.0189 | 21  | 1140.69 | 59.0385 |
| 22  | 1106.94 | 60.6438 | 23  | 1054.87 | 77.7415 | 24  | 1018.23 | 84.3294 |
| 25  | 966.162 | 83.0661 | 26  | 916.986 | 75.7822 | 27  | 849.49  | 70.7652 |
| 28  | 807.063 | 55.9479 | 29  | 760.78  | 78.6384 | 30  | 679.785 | 67.2533 |
| 31  | 621.931 | 74.995  | 32  | 596.861 | 79.003  | 33  | 543.828 | 81.9347 |
| 34  | 508.151 | 72.5307 | 35  | 461.868 | 87.2805 | 36  | 421.37  | 84.4007 |

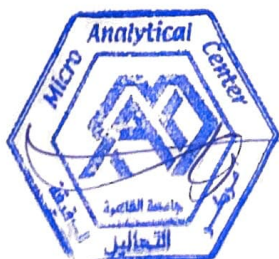

Handwritten signature in blue ink.

# <sup>1</sup>H NMR of compound 8b

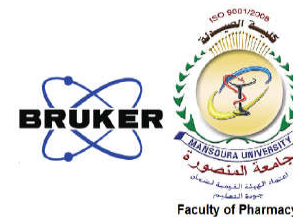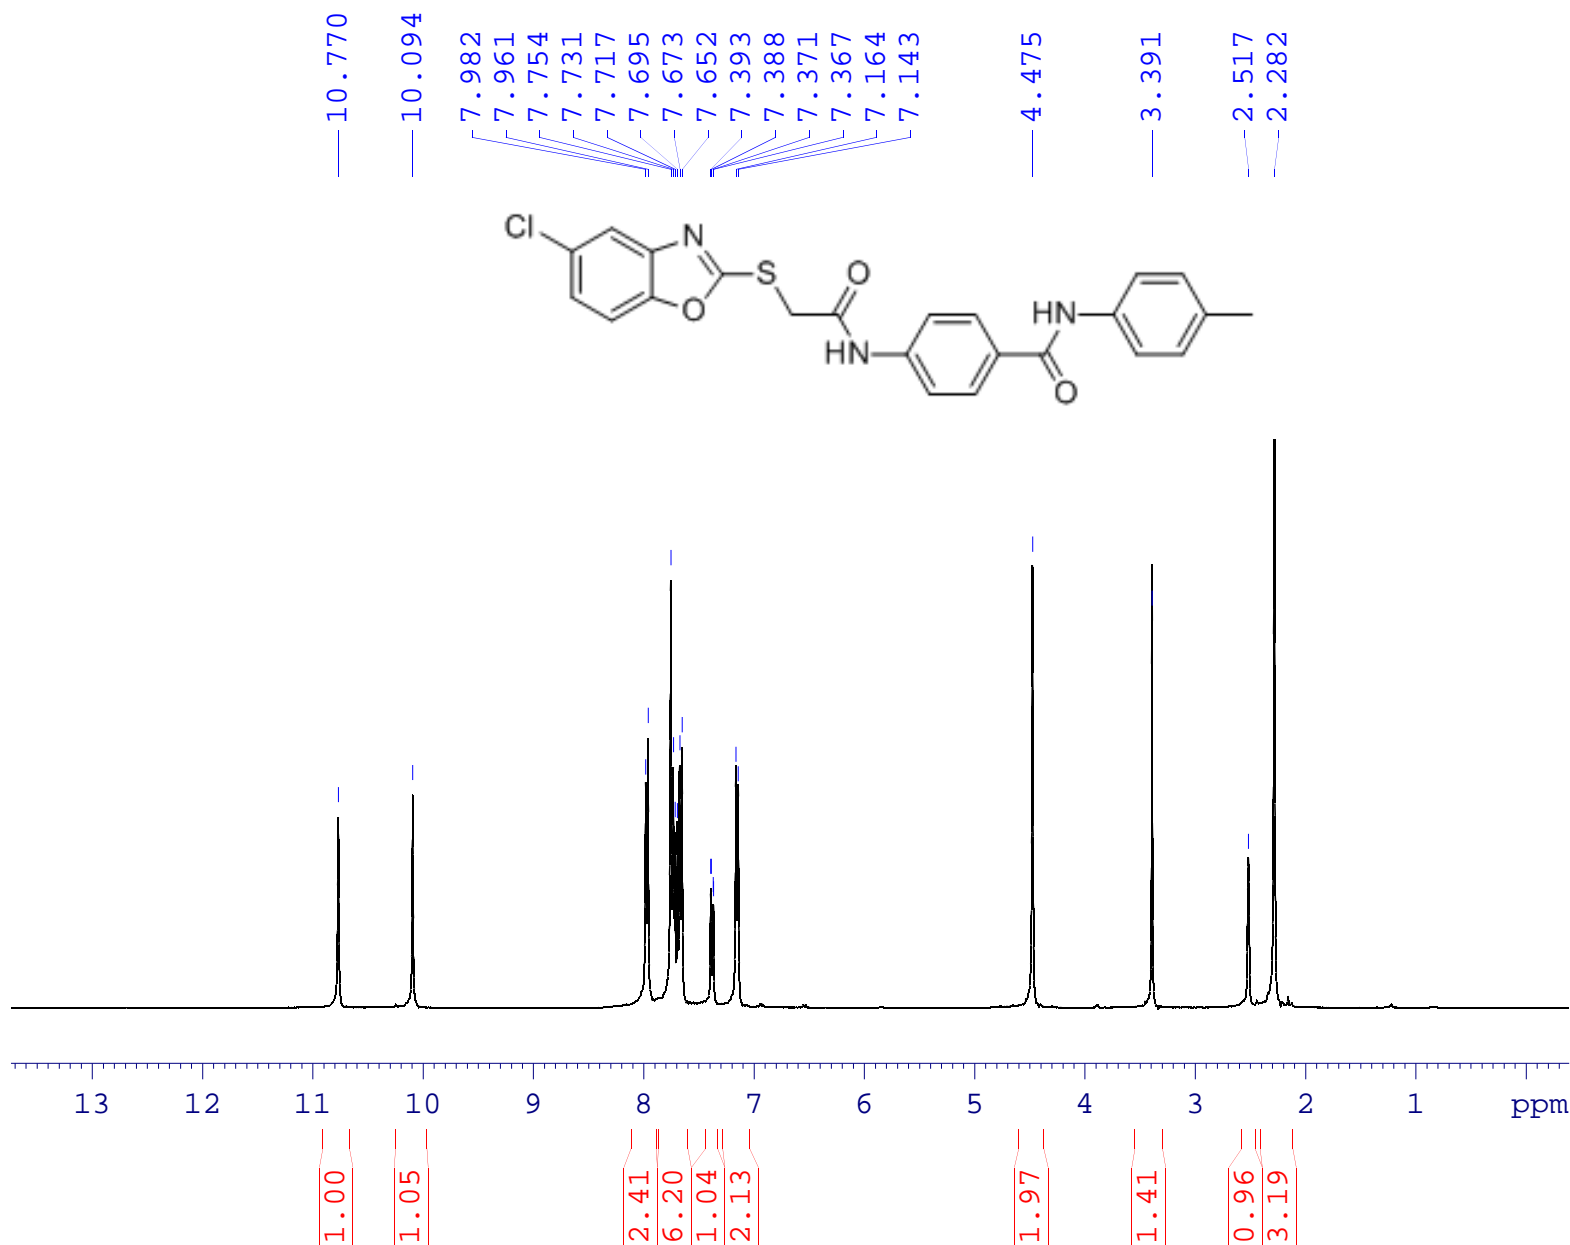

Current Data Parameters  
 NAME Ibrahim Eissa- CBA18x-proton-DMSO-D  
 EXPNO 10  
 PROCNO 1

F2 - Acquisition Parameters  
 Date\_ 20220111  
 Time 12.43 h  
 INSTRUM spect  
 PROBHD Z108618\_0945 (  
 PULPROG zg30  
 TD 65536  
 SOLVENT DMSO  
 NS 16  
 DS 2  
 SWH 8012.820 Hz  
 FIDRES 0.244532 Hz  
 AQ 4.0894465 sec  
 RG 112.56  
 DW 62.400 usec  
 DE 6.50 usec  
 TE 0 K  
 D1 1.00000000 sec  
 TD0 1  
 SF01 400.2024712 MHz  
 NUC1 1H  
 P1 13.50 usec  
 PLW1 13.00000000 W

F2 - Processing parameters  
 SI 65536  
 SF 400.2000000 MHz  
 WDW EM  
 SSB 0  
 LB 0.30 Hz  
 GB 0  
 PC 1.00

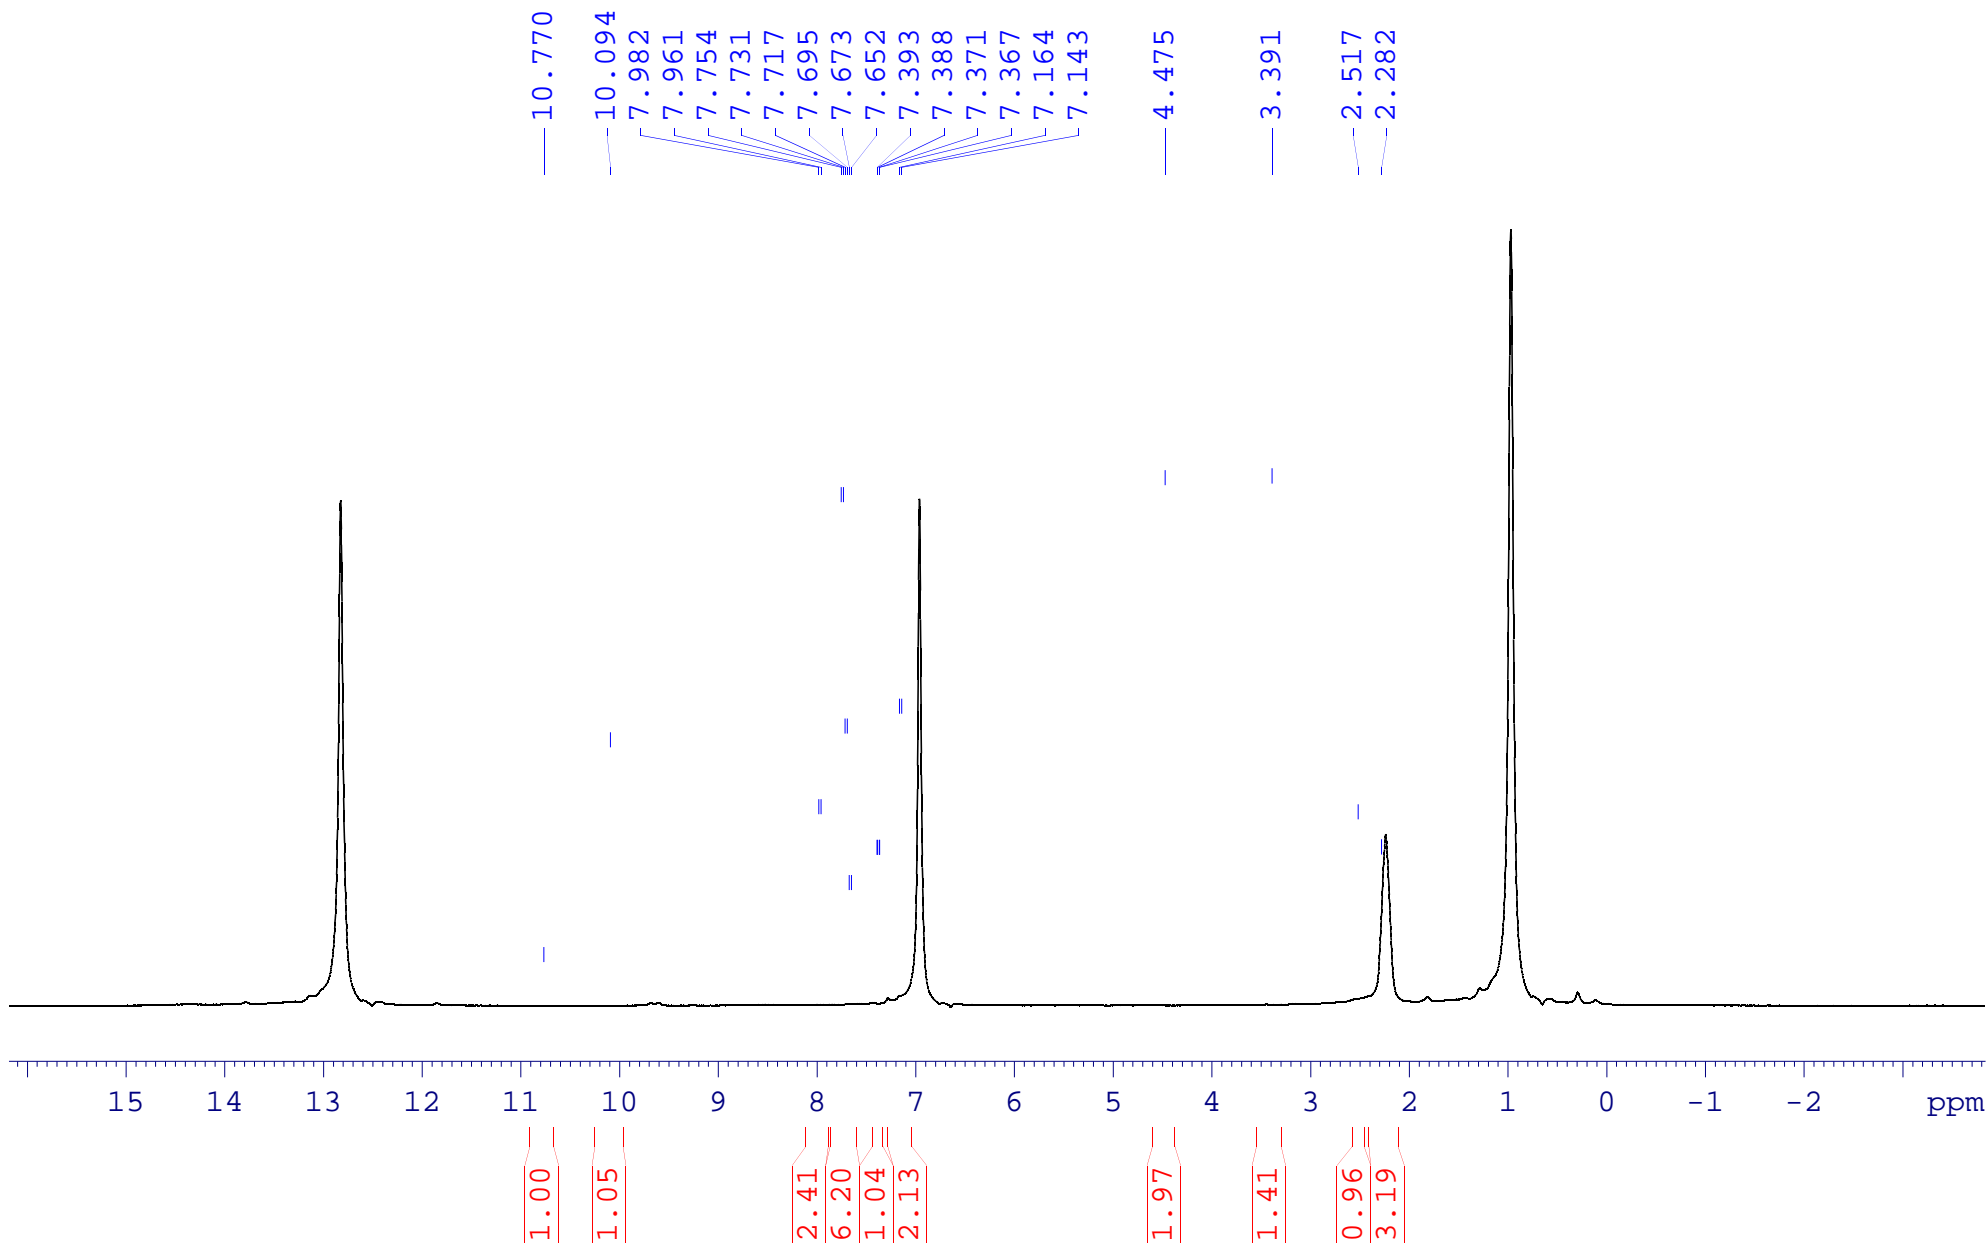

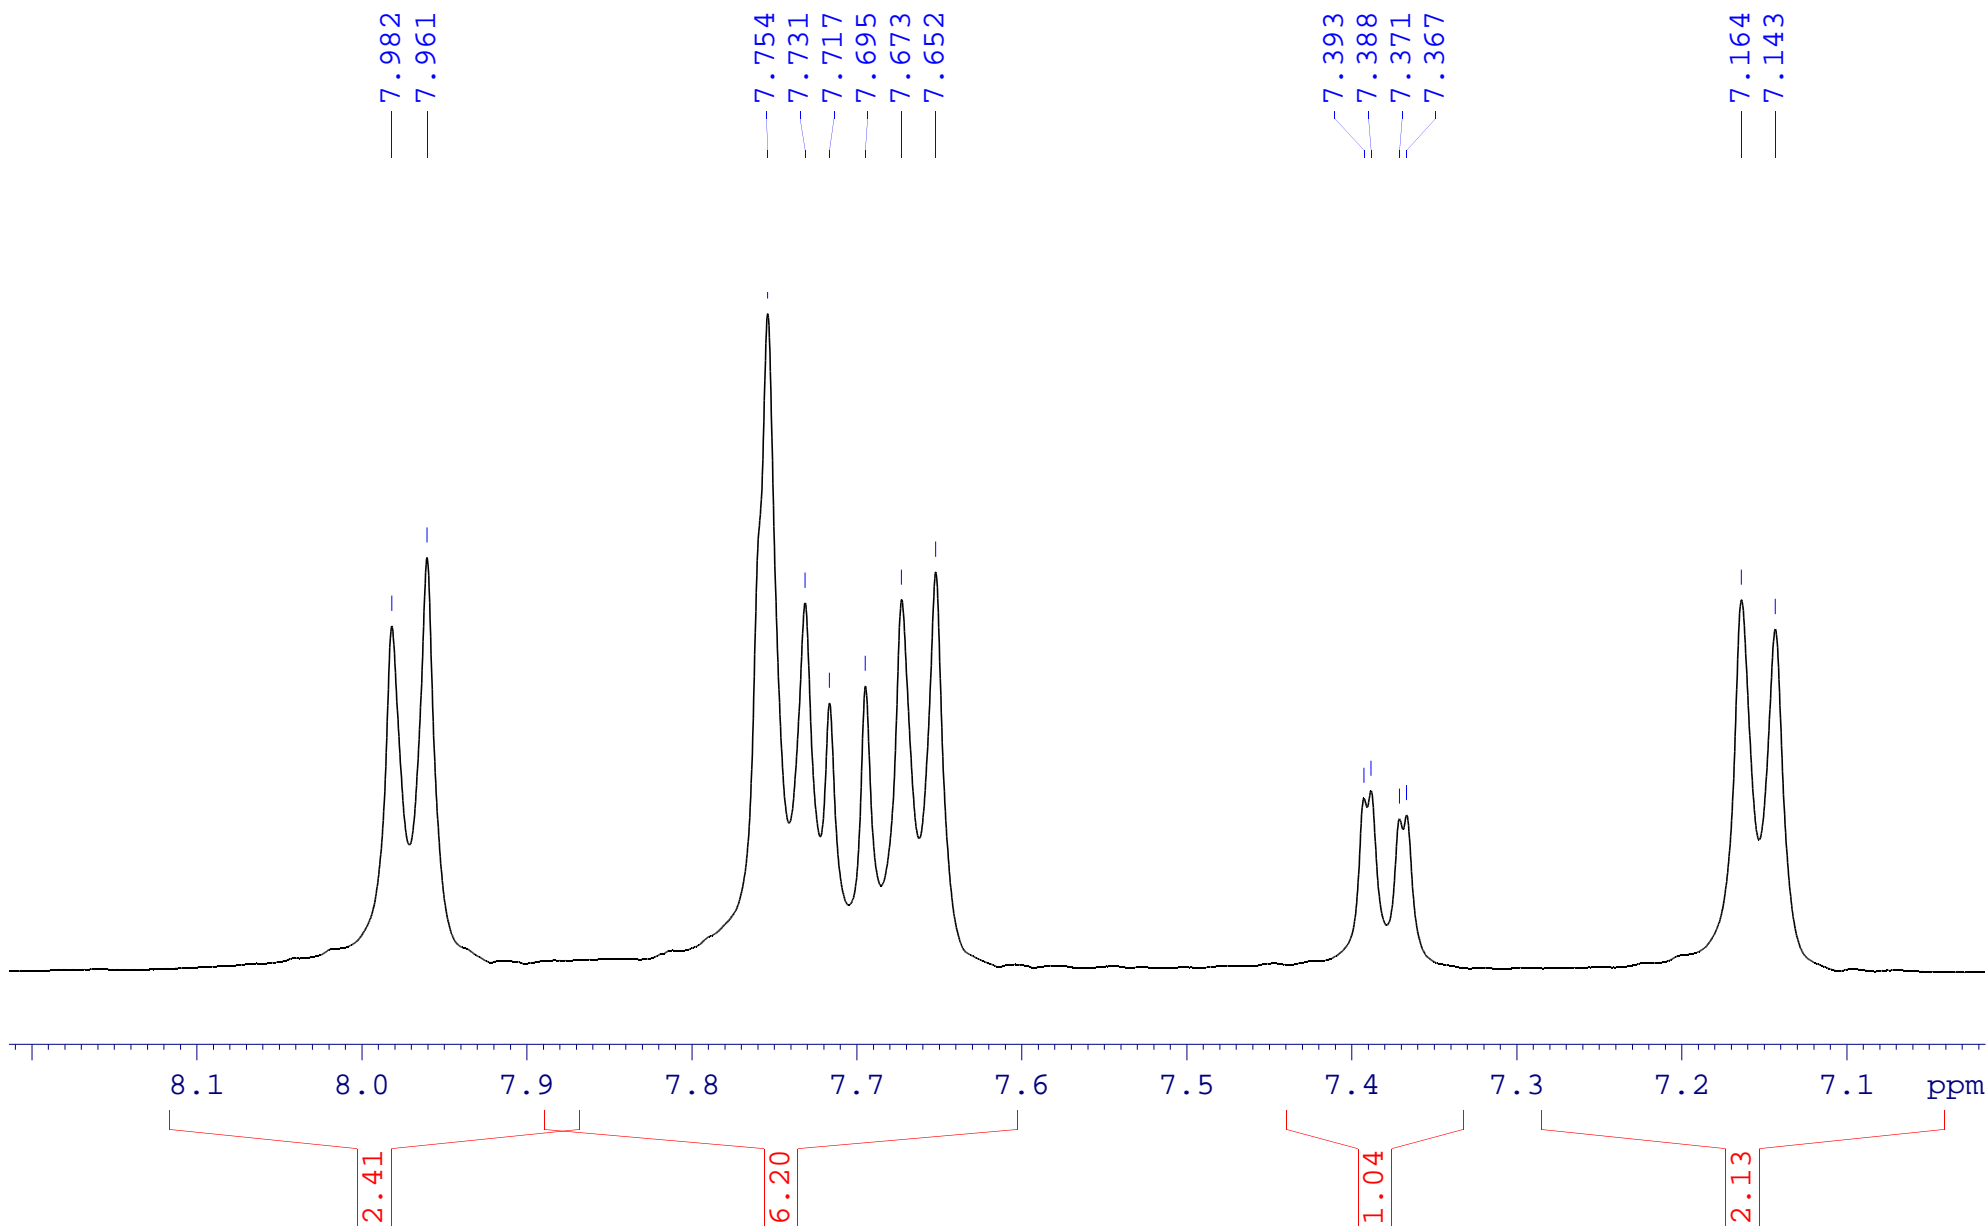

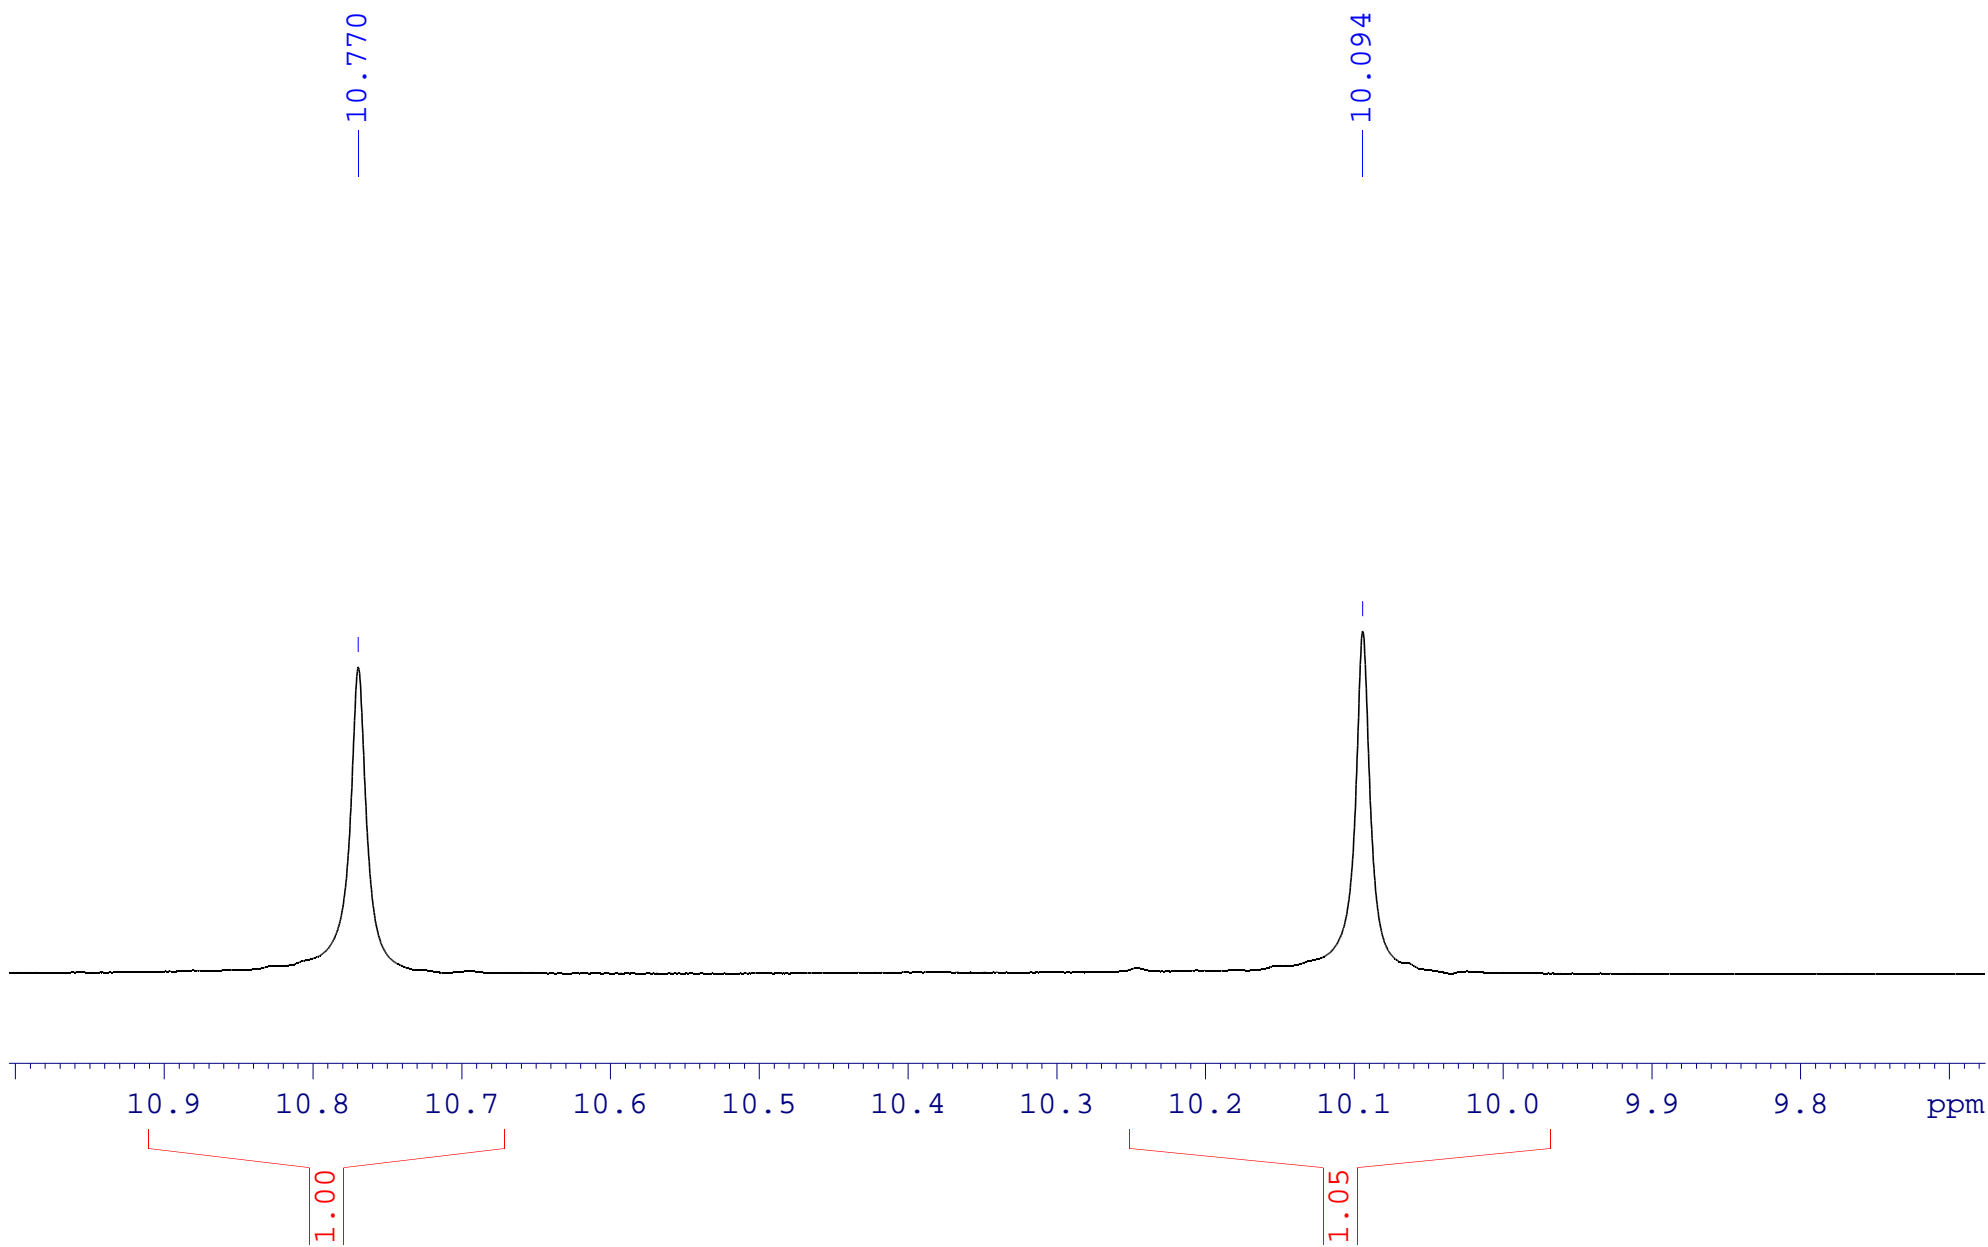

# <sup>13</sup>C NMR of compound 8b

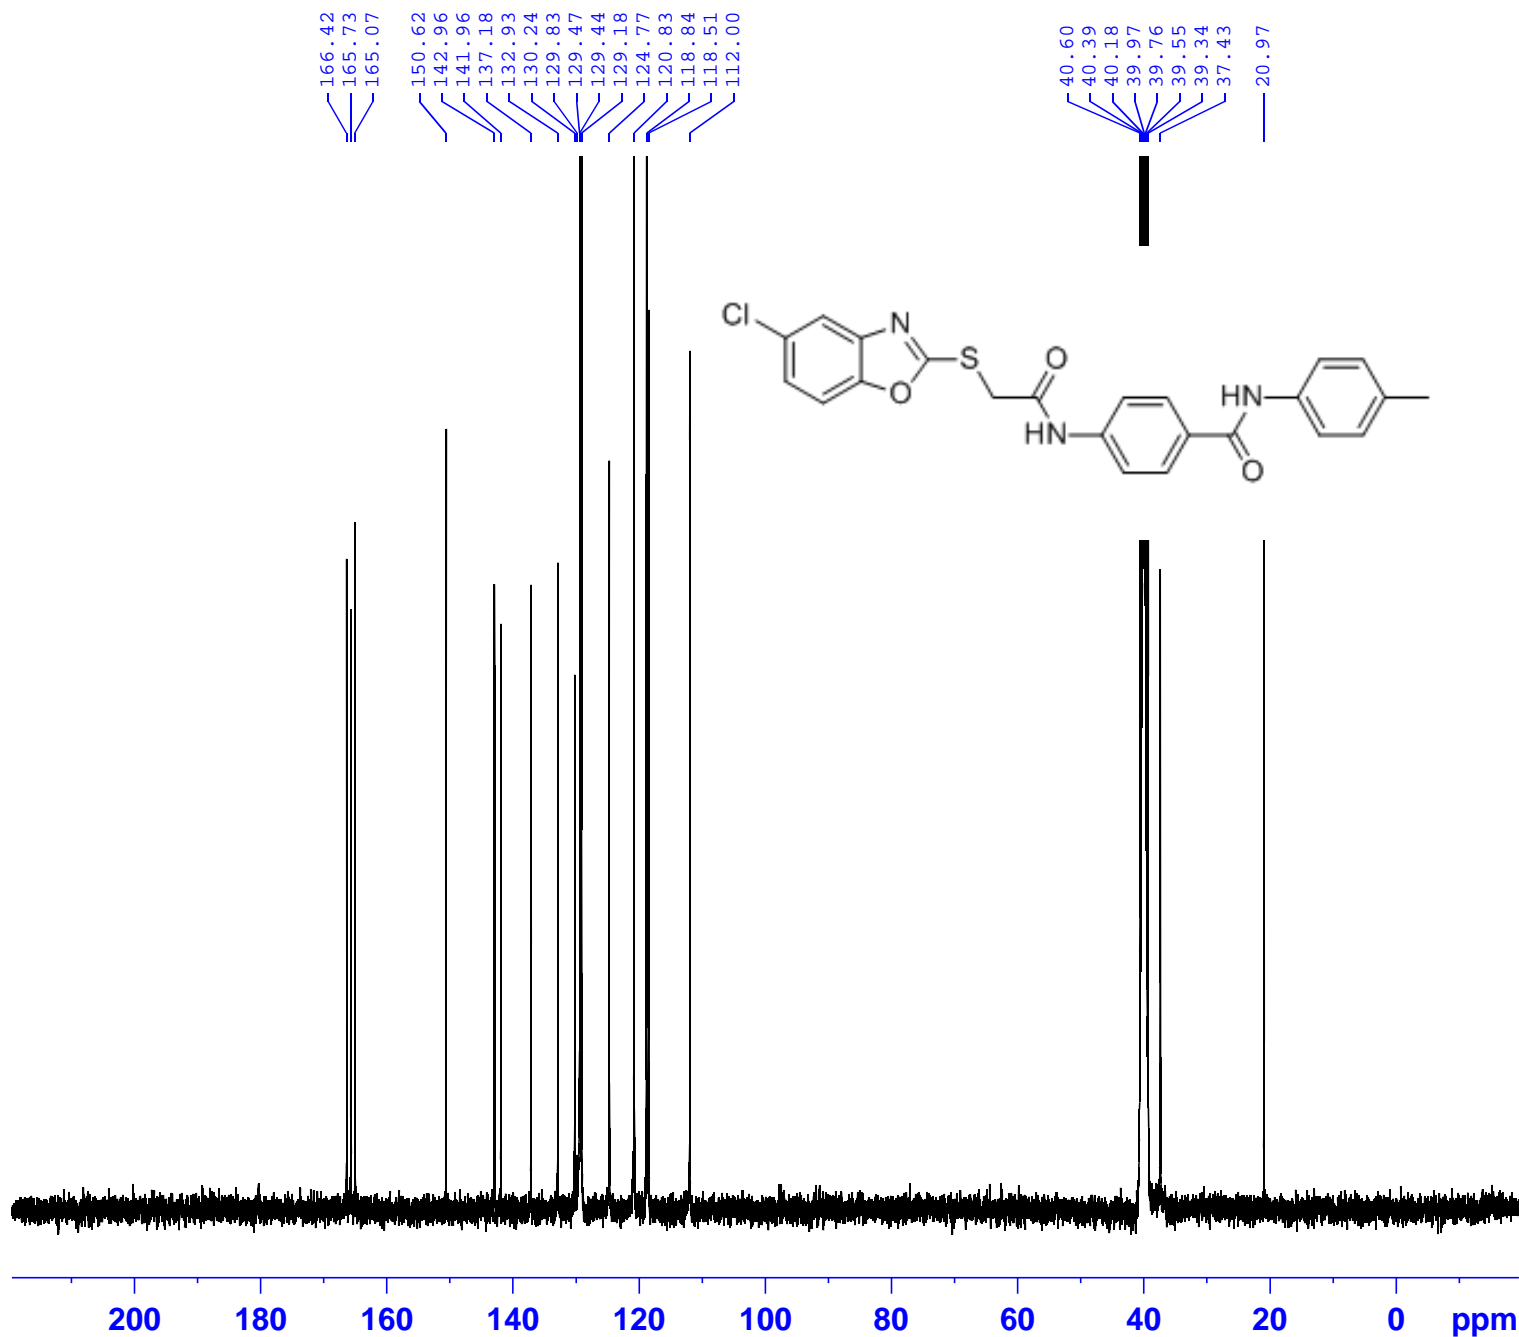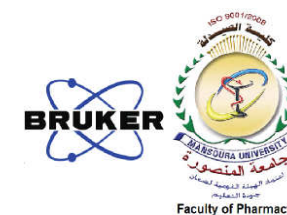

Current Data Parameters  
NAME IbrahimEisa-CBA-18X-C13NMR-Em  
EXPNO 10  
PROCNO 1

F2 - Acquisition Parameters  
Date\_ 20220112  
Time 19.05 h  
INSTRUM spect  
PROBHD Z108618\_0945 (  
PULPROG zgpg30  
TD 65536  
SOLVENT DMSO  
NS 2200  
DS 4  
SWH 24038.461 Hz  
FIDRES 0.733596 Hz  
AQ 1.3631488 sec  
RG 197.77  
DW 20.800 usec  
DE 6.50 usec  
TE 0 K  
D1 2.00000000 sec  
D11 0.03000000 sec  
TD0 1  
SF01 100.6404331 MHz  
NUC1 13C  
P1 10.00 usec  
PLW1 47.00000000 W  
SF02 400.2016008 MHz  
NUC2 1H  
CPDPRG[2] waltz16  
PCPD2 90.00 usec  
PLW2 13.00000000 W  
PLW12 0.29249999 W  
PLW13 0.14713000 W

F2 - Processing parameters  
SI 32768  
SF 100.6303700 MHz  
WDW EM  
SSB 0  
LB 1.00 Hz  
GB 0  
PC 1.40

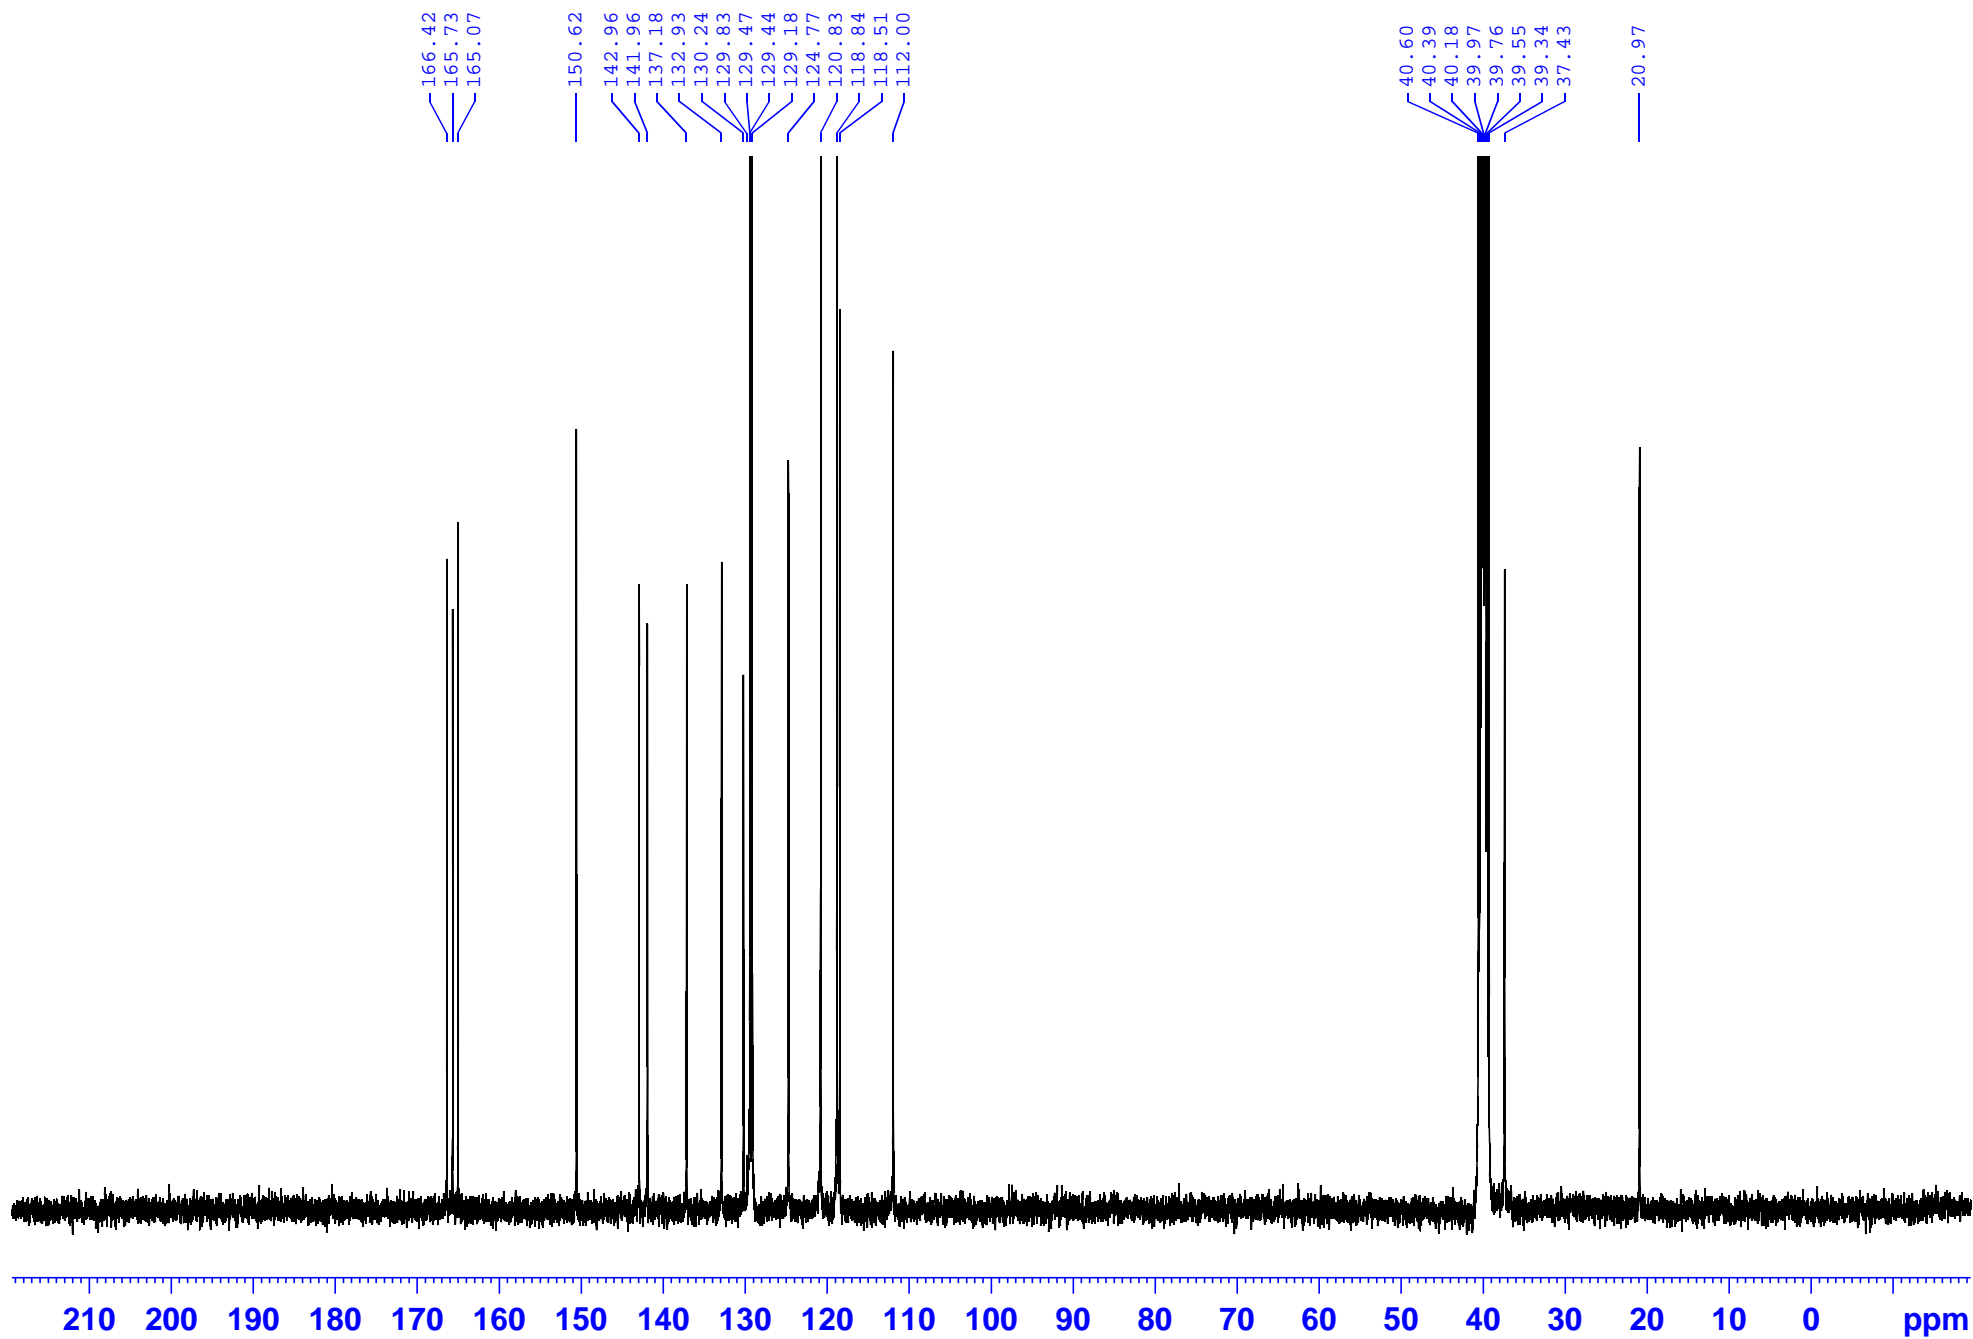



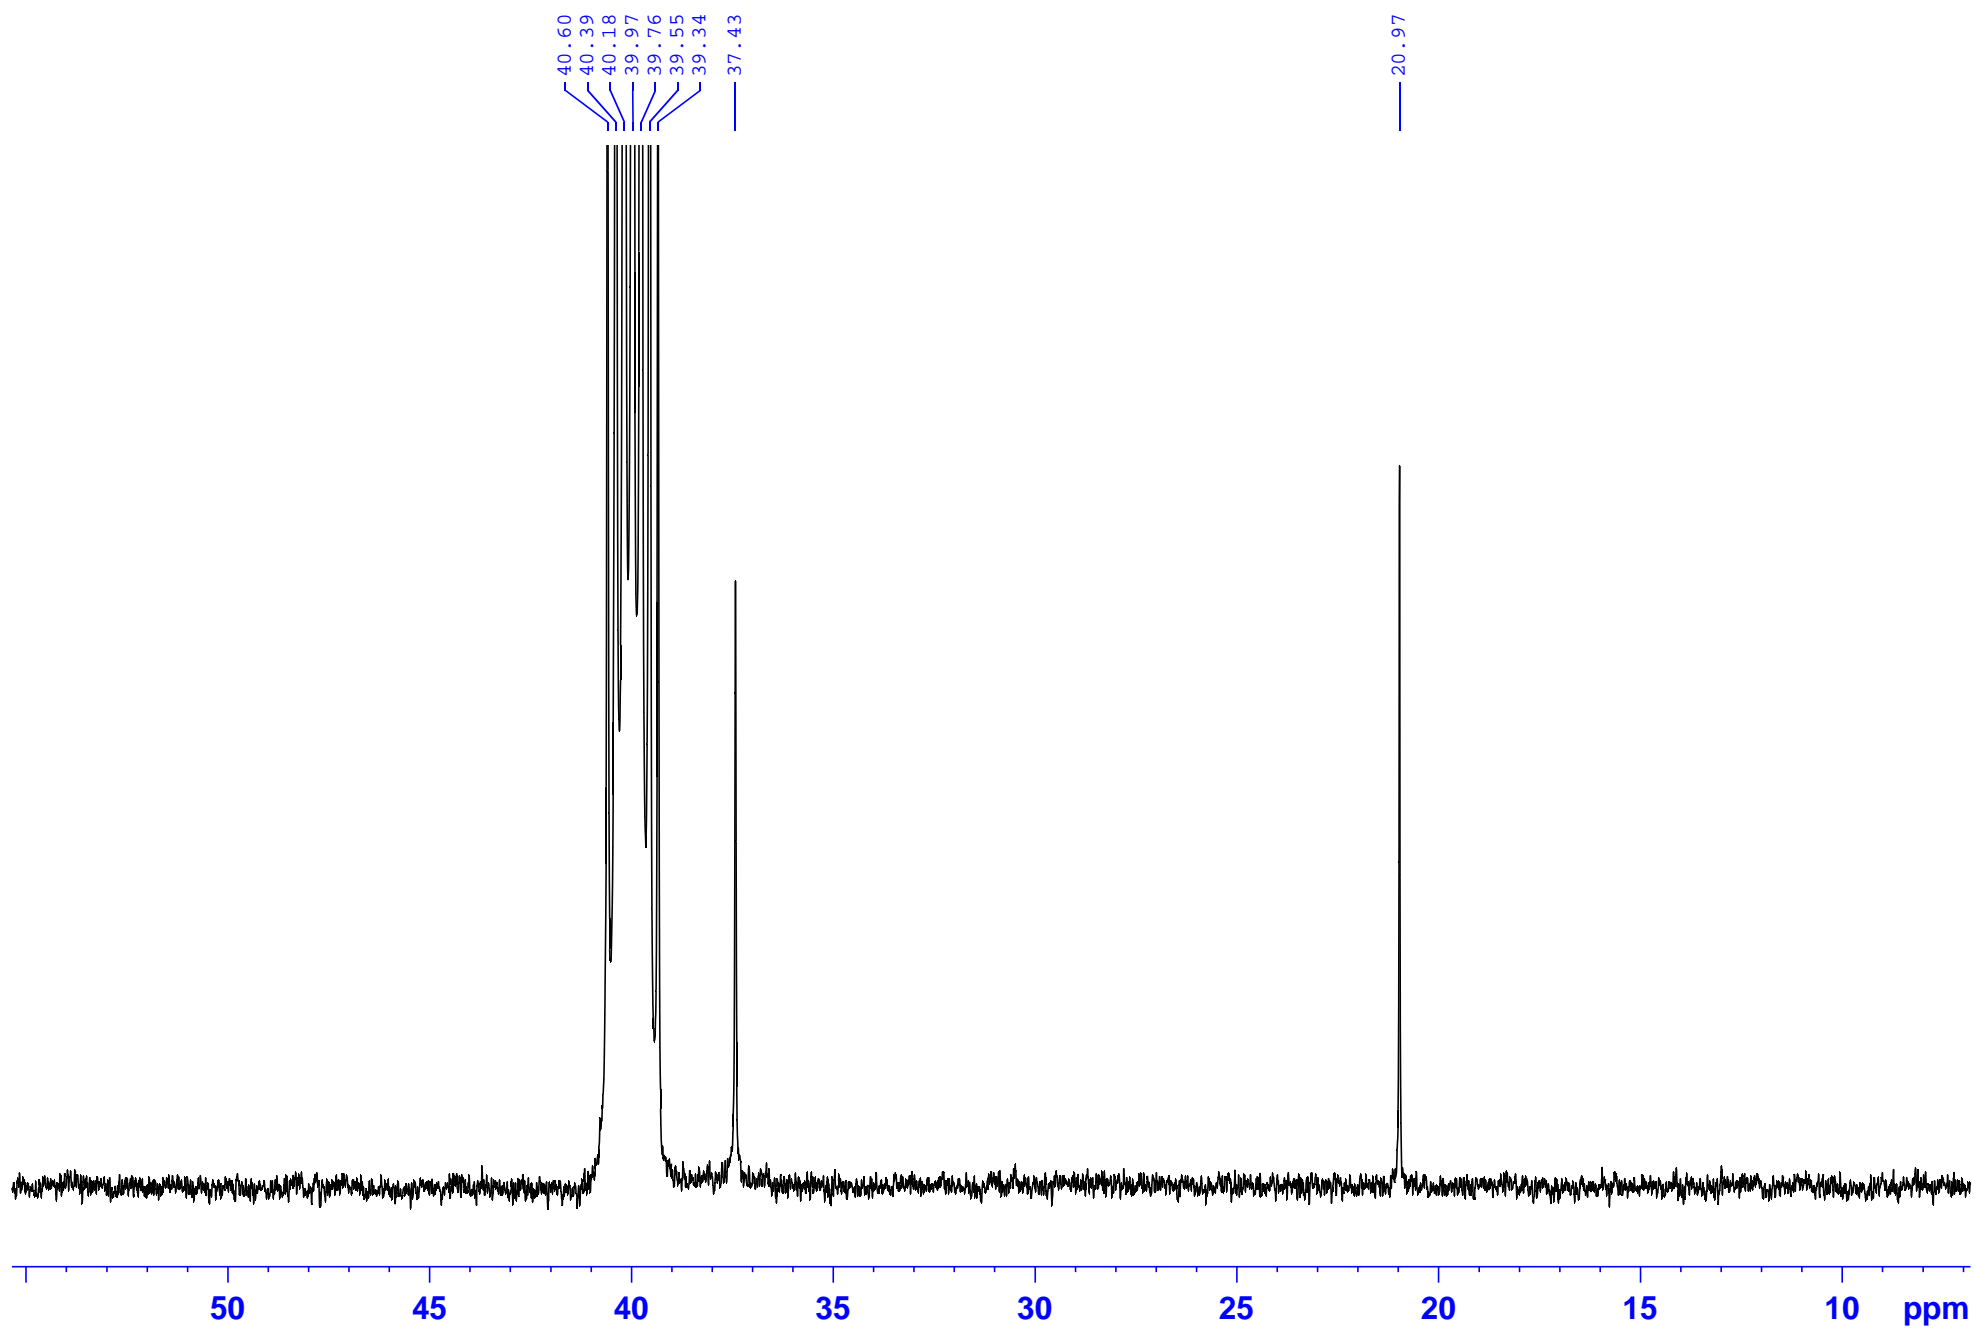

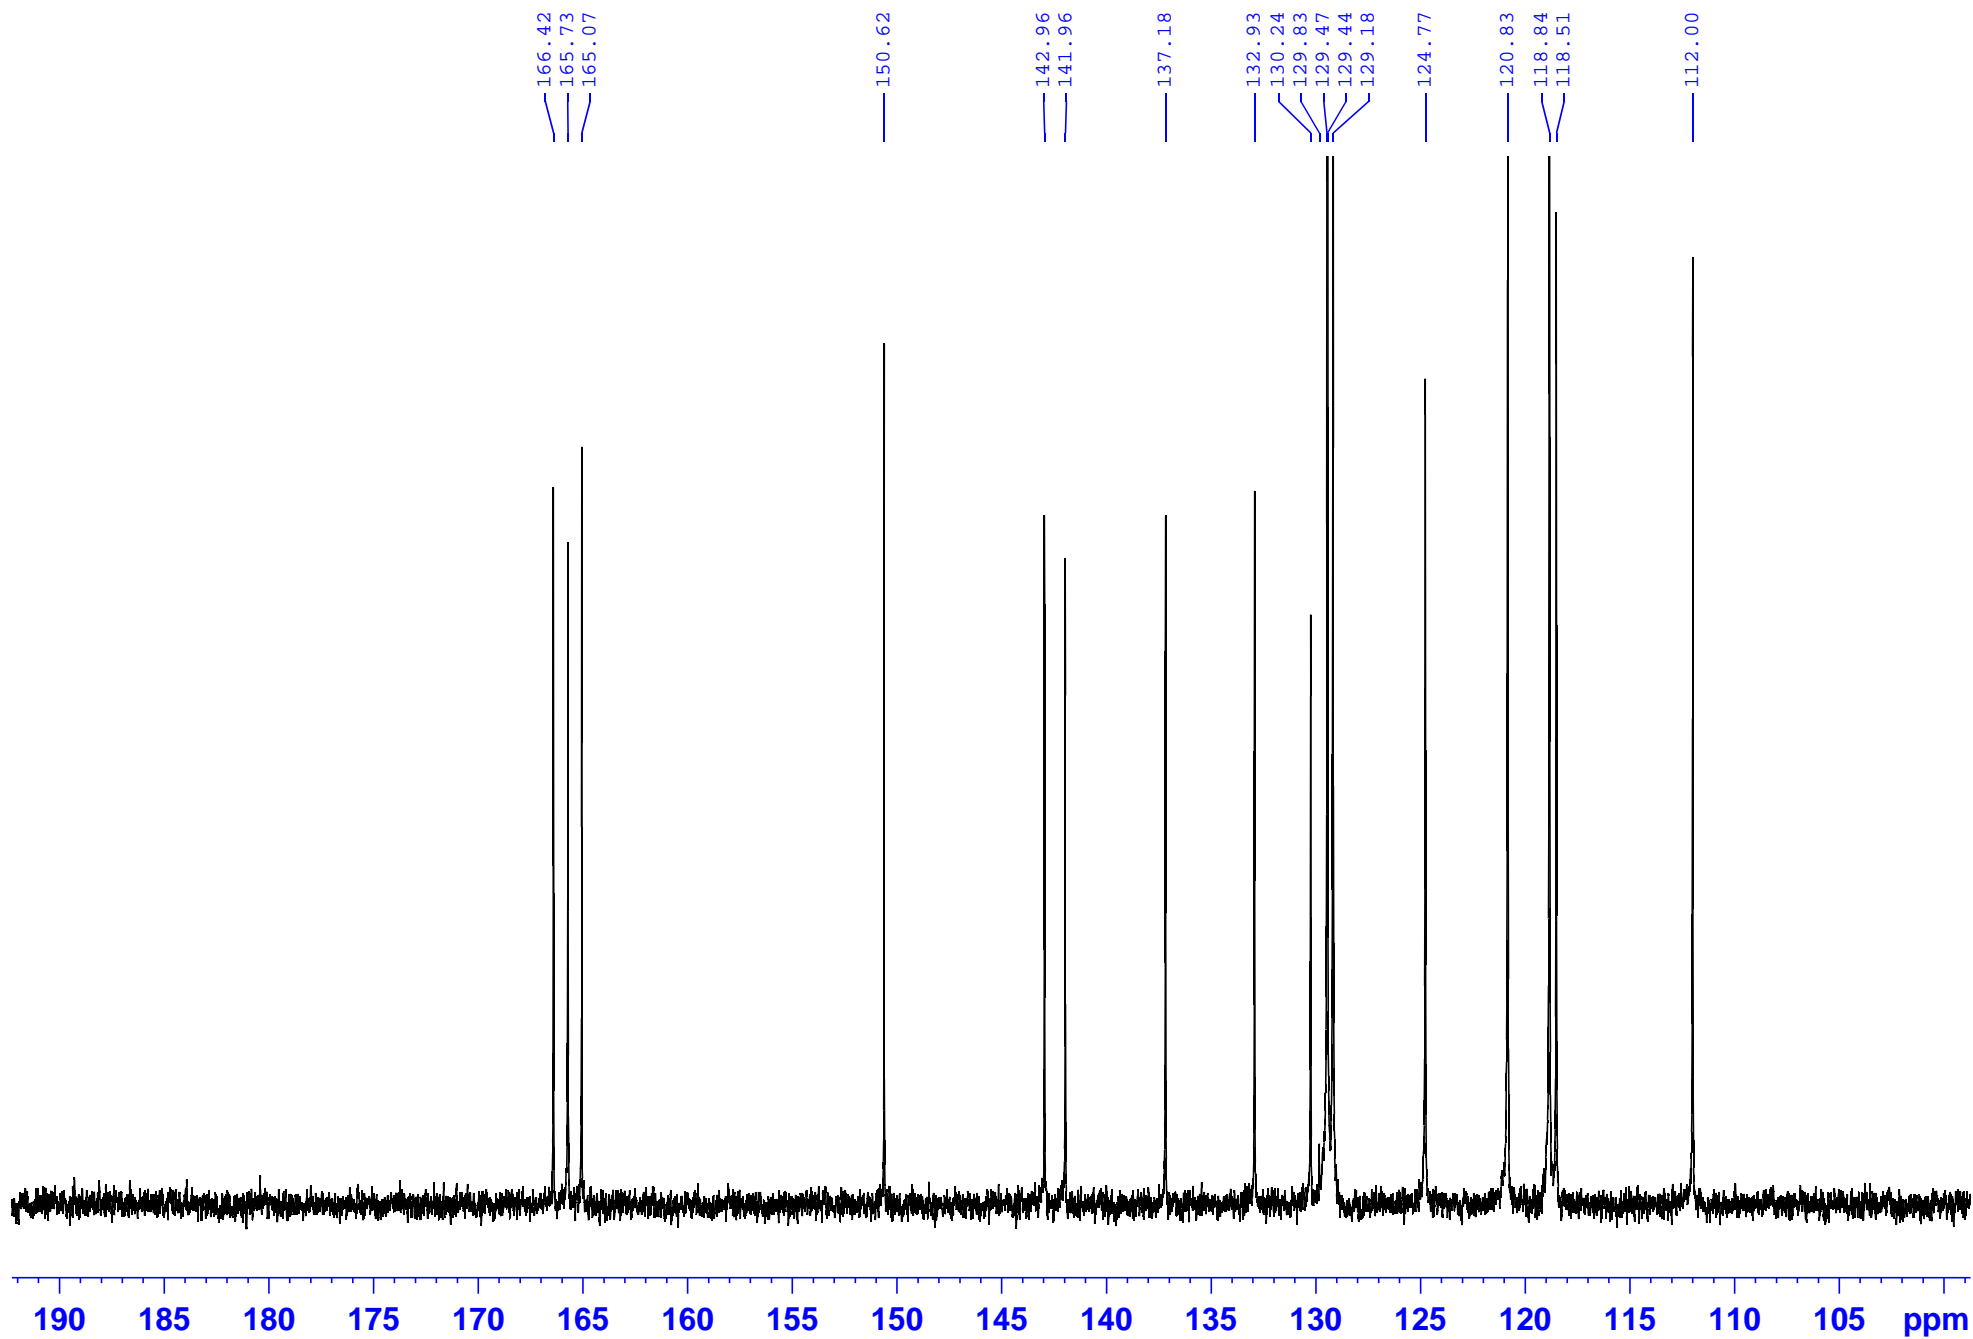

## Cairo University Micro Analytical Center

### DI Analysis Shimadzu Qp-2010 Plus

#### Sample Information

Analyzed by : Dr. Mai Younis  
 Analyzed : 01/01/2007 10:27:07  
 Sample Name : 15  
 Sample ID :  
 Customer Name : Dr. Radwan Saeed - Pharmacy - Helwan  
 Data File : C:\GCMSsolution\Data\Project1\15.QGD  
 Org Data File : C:\GCMSsolution\Data\Project1\15.QGD  
 Method File : C:\GCMSsolution\Data\Project1\High Temperature Op  
 Org Method File : C:\GCMSsolution\Data\Project1\High Temperature Op  
 Report File :  
 Tuning File : C:\GCMSsolution\System\Tune1\\_default.qgt  
 \$EndIf\$Modified by : Dr. Mai Younis  
 Modified : 01/01/2007 10:31:27

#### Method

Analytical Line 1  
 IonSourceTemp : 250.00 °C  
 [MS Table]  
 --Group 1 - Event 1--  
 Start Time : 0.00min  
 End Time : 10.00min  
 ACQ Mode : Scan  
 Event Time : 0.50sec  
 Scan Speed : 1250  
 Start m/z : 50.00  
 End m/z : 600.00

Electron Voltage : 70 eV  
 Ionization Mode : EI

C:\GCMSsolution\Data\Project1\15.QGD

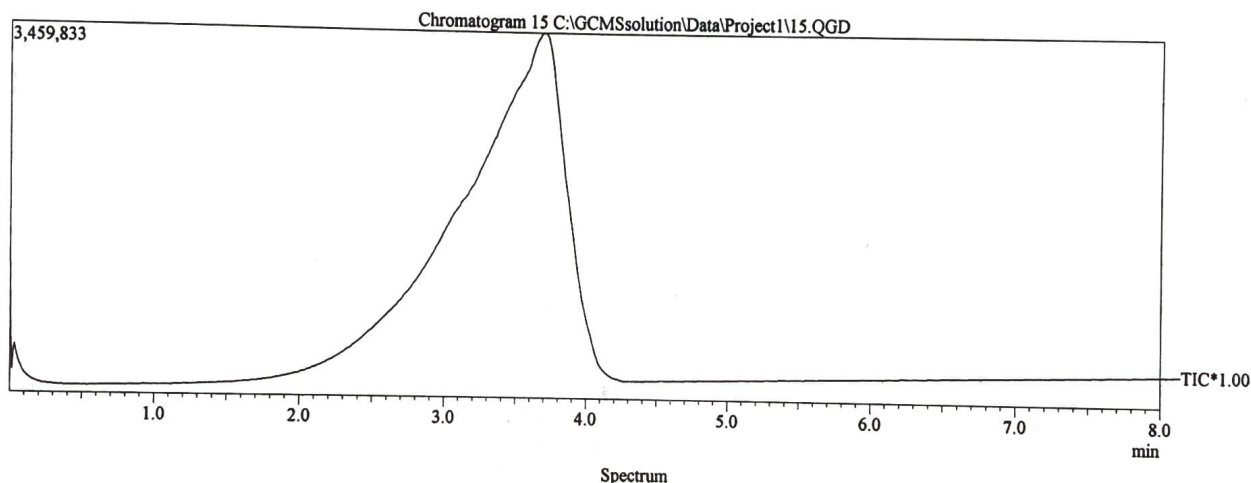

Line#:1 R.Time:3.6(Scan#:438)

MassPeaks:288

RawMode:Single 3.6(438) BasePeak:120(403755)

BG Mode:None Group 1 - Event 1

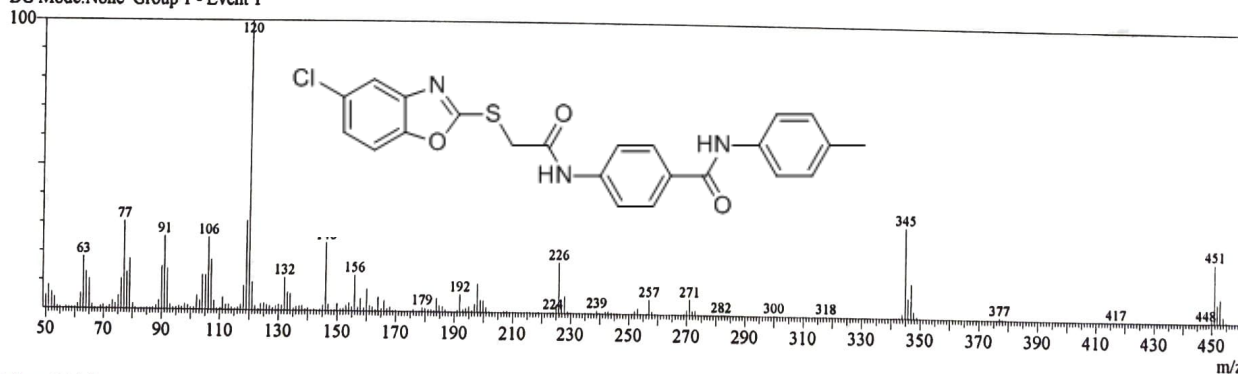

#### Mass Table

Line#:1 R.Time:3.6(Scan#:438)

MassPeaks:288

RawMode:Single 3.6(438) BasePeak:120(403755)

BG Mode:None Group 1 - Event 1

| # | m/z   | Abs. In | Rel. Int. | # | m/z   | Abs. In | Rel. Int. | # | m/z   | Abs. In | Rel. Int. |
|---|-------|---------|-----------|---|-------|---------|-----------|---|-------|---------|-----------|
| 1 | 50.00 | 18479   | 4.58      | 4 | 53.00 | 16287   | 4.03      | 7 | 56.05 | 1425    | 0.35      |
| 2 | 51.00 | 33284   | 8.24      | 5 | 54.00 | 3762    | 0.93      | 8 | 57.00 | 2969    | 0.74      |
| 3 | 52.00 | 23167   | 5.74      | 6 | 55.00 | 2662    | 0.66      | 9 | 58.00 | 2566    | 0.64      |

# IR of compound 8c

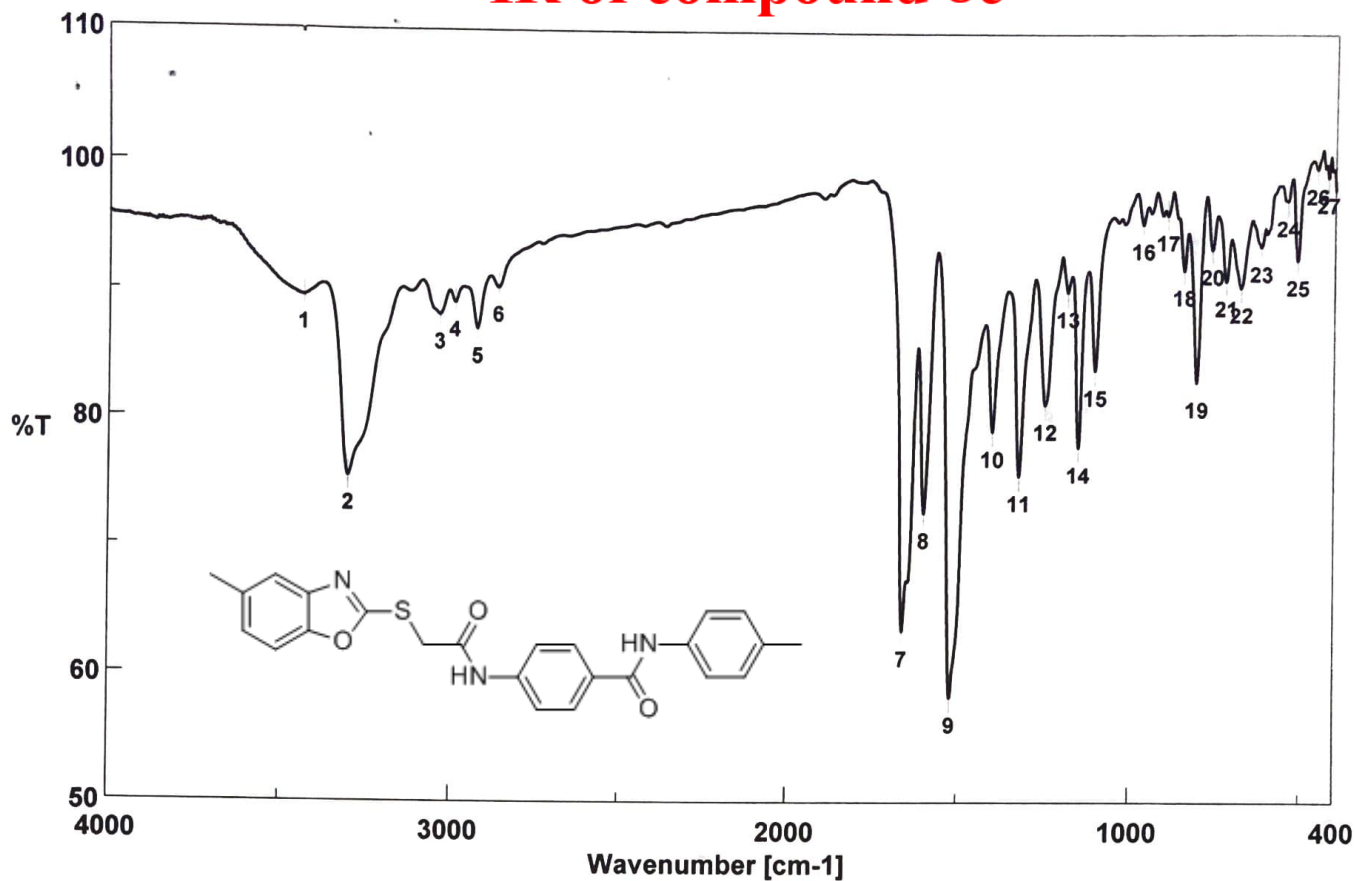

Accumulation 16  
 Resolution 4 cm-1  
 Zero Filling ON  
 Apodization Cosine  
 Gain Auto (2)  
 Scanning Speed Auto (2 mm/sec)  
 Date/Time 8/22/2021 1:48PM  
 Update 8/22/2021 1:50PM  
 Operator IR  
 File Name Memory#82  
 Sample Name MBA - 18  
 Comment

| No. | cm-1    | %T      | No. | cm-1    | %T      | No. | cm-1    | %T      |
|-----|---------|---------|-----|---------|---------|-----|---------|---------|
| 1   | 3428.81 | 89.4484 | 2   | 3297.68 | 75.3214 | 3   | 3030.59 | 87.8966 |
| 4   | 2985.27 | 88.8565 | 5   | 2920.66 | 86.8082 | 6   | 2858.95 | 90.0408 |
| 7   | 1662.34 | 63.3763 | 8   | 1602.56 | 72.5626 | 9   | 1521.56 | 58.2114 |
| 10  | 1404.89 | 78.9089 | 11  | 1325.82 | 75.4651 | 12  | 1251.58 | 81.0499 |
| 13  | 1186.01 | 89.9022 | 14  | 1153.22 | 77.7239 | 15  | 1105.98 | 83.769  |
| 16  | 965.198 | 95.3102 | 17  | 892.88  | 96.0258 | 18  | 843.704 | 91.7076 |
| 19  | 806.099 | 82.9153 | 20  | 761.744 | 93.3441 | 21  | 720.282 | 90.8579 |
| 22  | 675.928 | 90.3736 | 23  | 618.074 | 93.5977 | 24  | 539.971 | 97.2097 |
| 25  | 510.08  | 92.5405 | 26  | 454.154 | 99.7057 | 27  | 422.334 | 99.0445 |

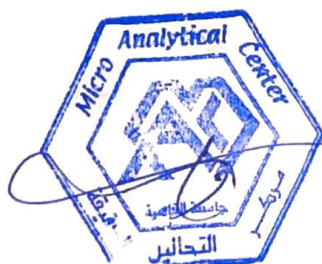

Handwritten signature/initials.

### <sup>1</sup>H NMR of compound 8c

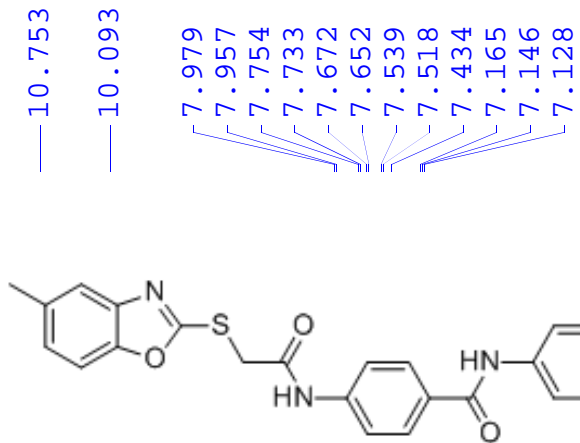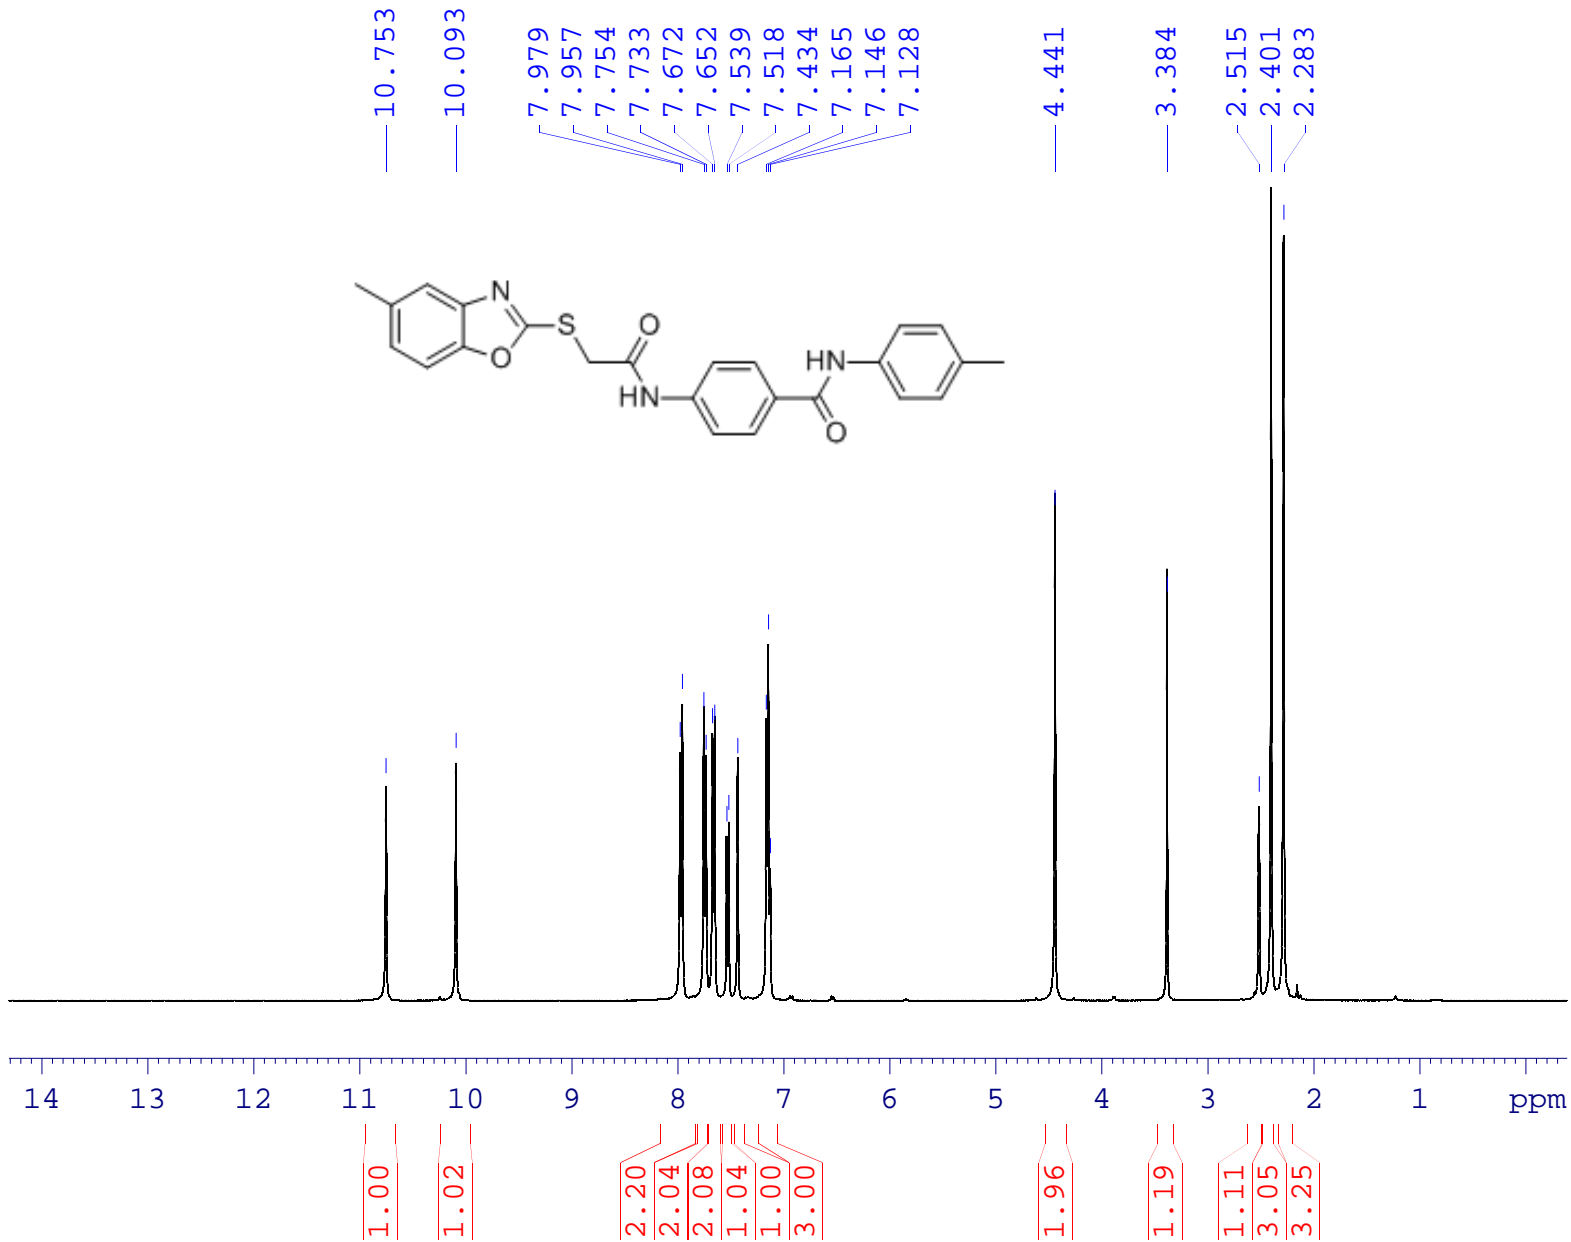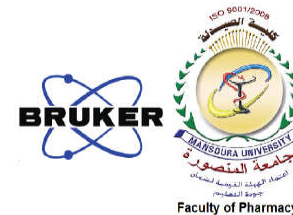

```
Current Data Parameters
NAME      Ibrahim Eissa- MBA-18-proton-DMSO-D
EXPNO          10
PROCNO         1
```

## F2 - Acquisition Parameters

```

Z' Acquisition Parameters
Time_ 20220111
INSTRUM spect
PROBHD Z108618_0945 (
PULPROG zg30
TD 65536
SOLVENT DMSO
NS 16
DS 2
SWH 8012.820 Hz
FIDRES 0.244532 Hz
AQ 4.0894465 sec
RG 112.56
DW 62.400 usec
DE 6.50 usec
TE 0 K
D1 1.00000000 sec
TD0 1
SF01 400.2024712 MHz
NUC1 1H
P1 13.50 usec
PLW1 13.00000000 W

```

## F2 - Processing parameters

```

F2 - Processing parameters
SI                      65536
SF                    400.2000000 MHz
WDW                      EM
SSB                      0
LB                      0.30 Hz
GB                      0
PC                      1.00

```

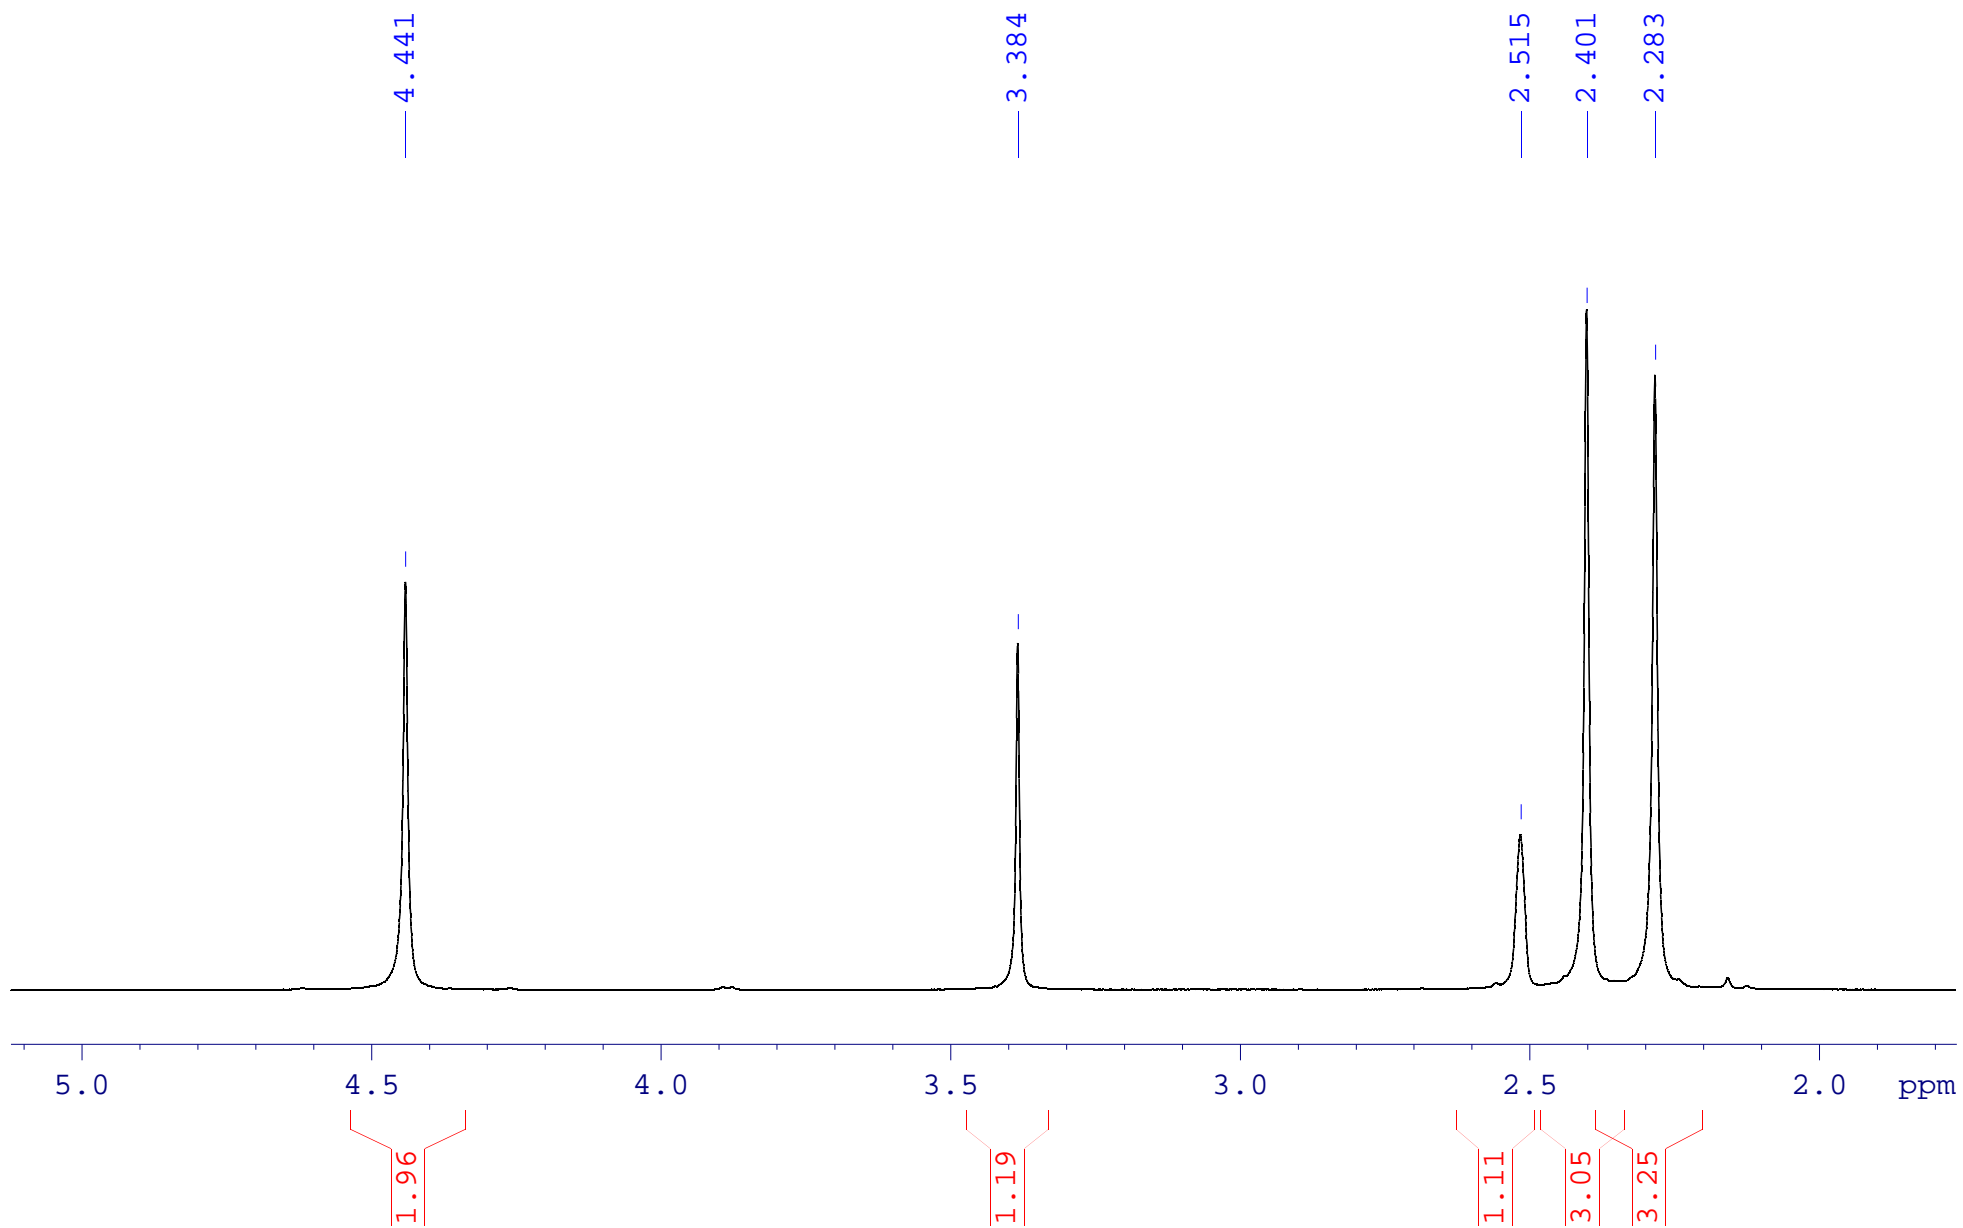

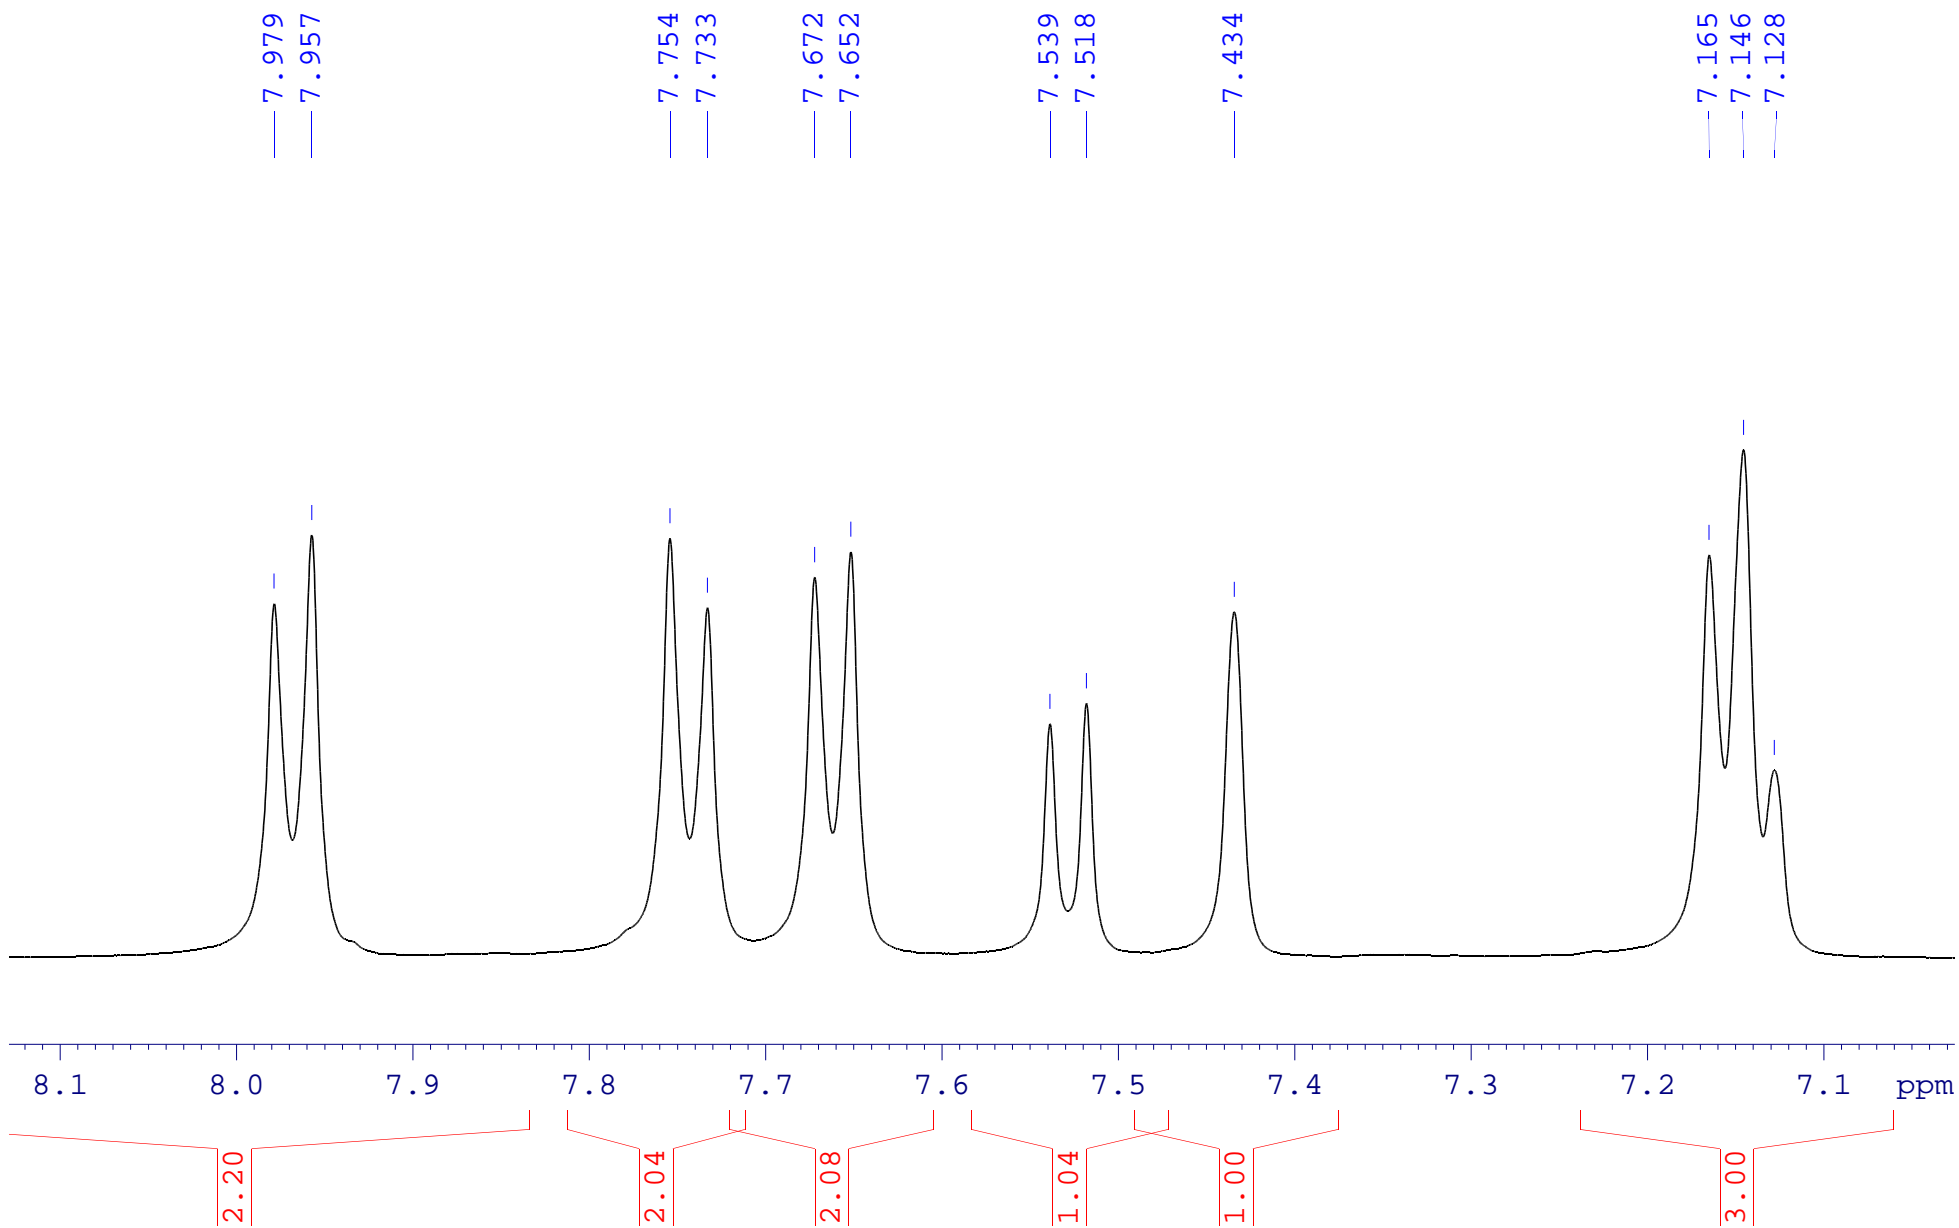

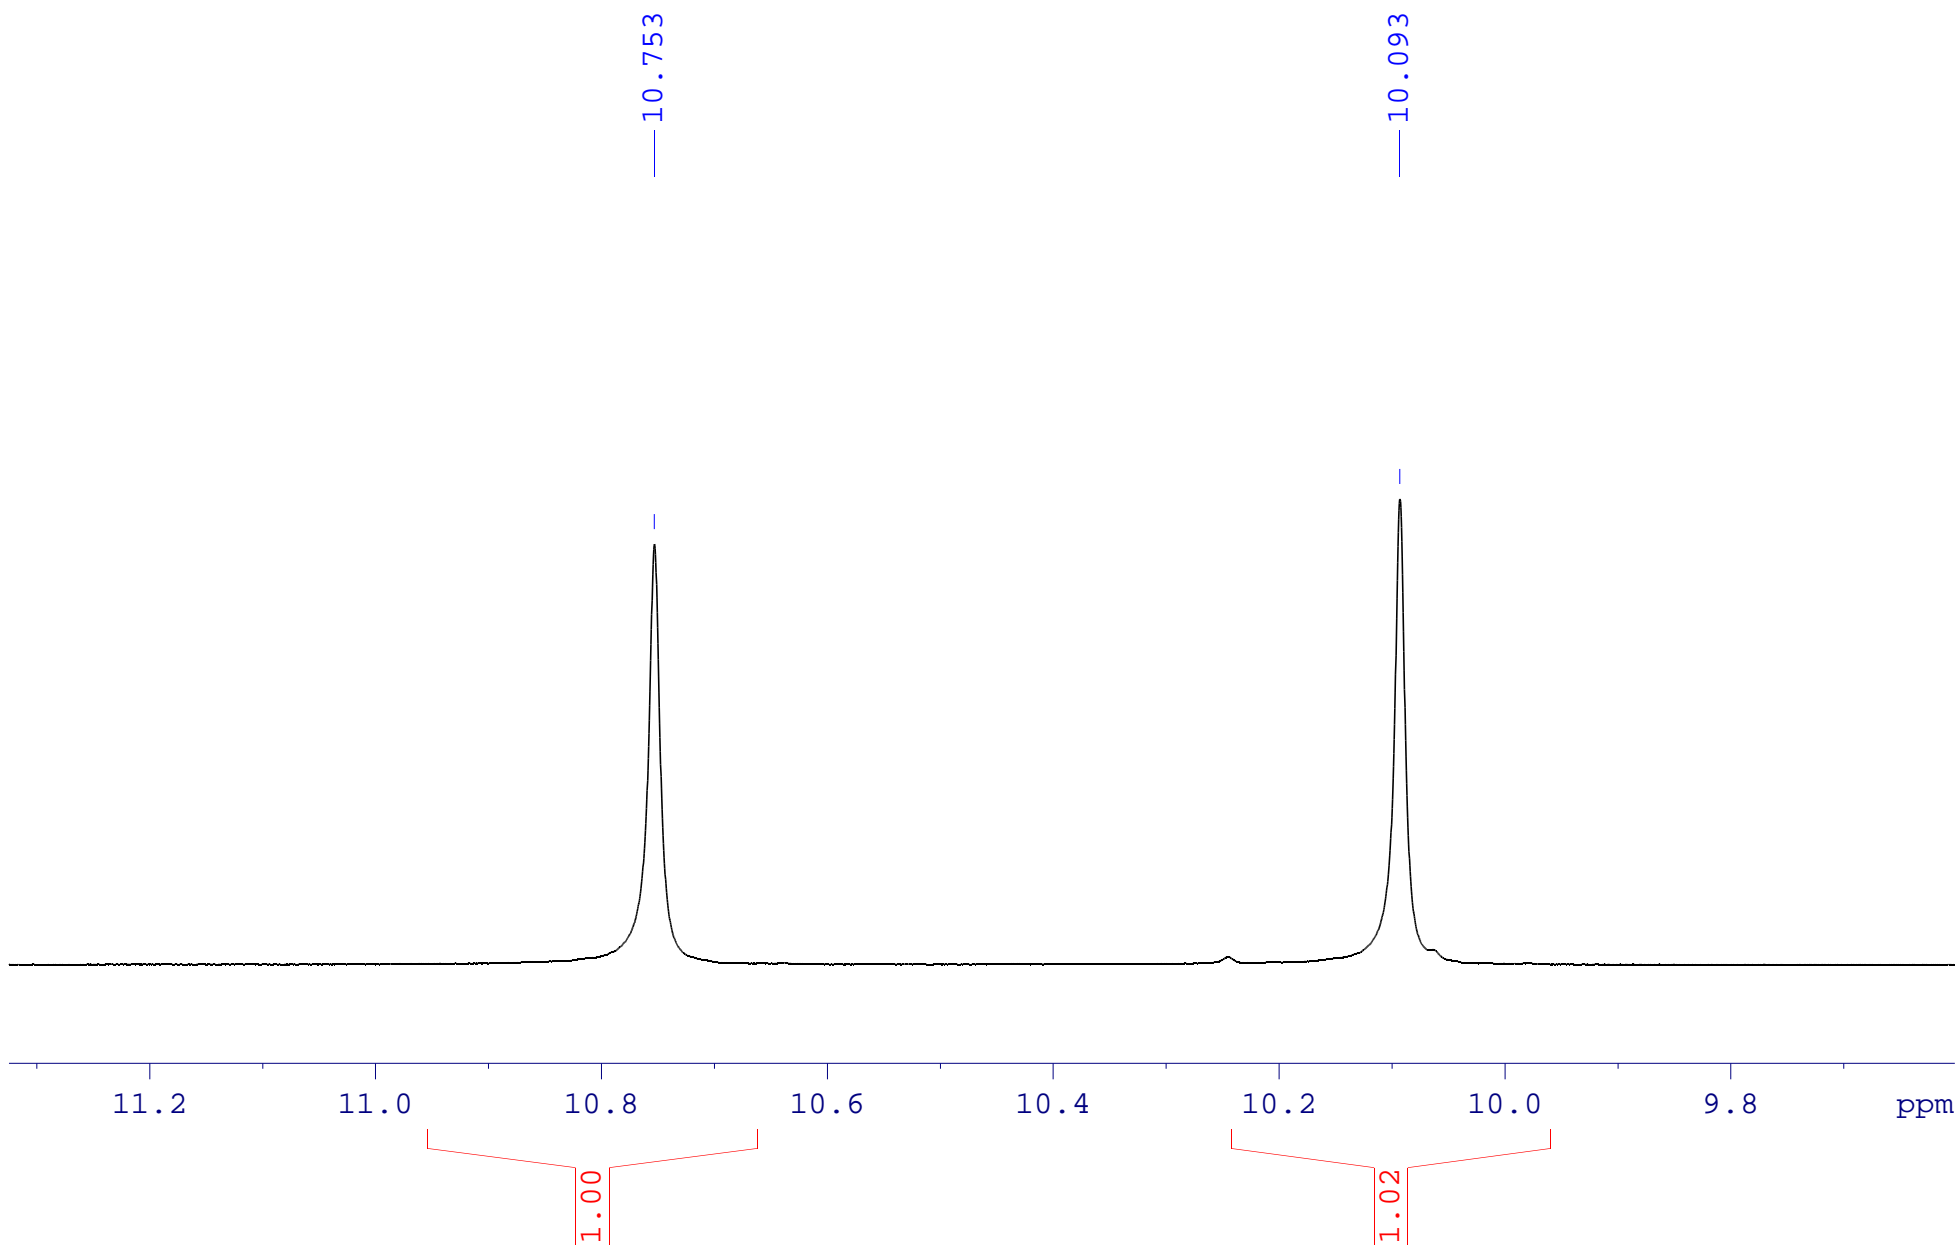



# <sup>13</sup>C NMR of compound 8c

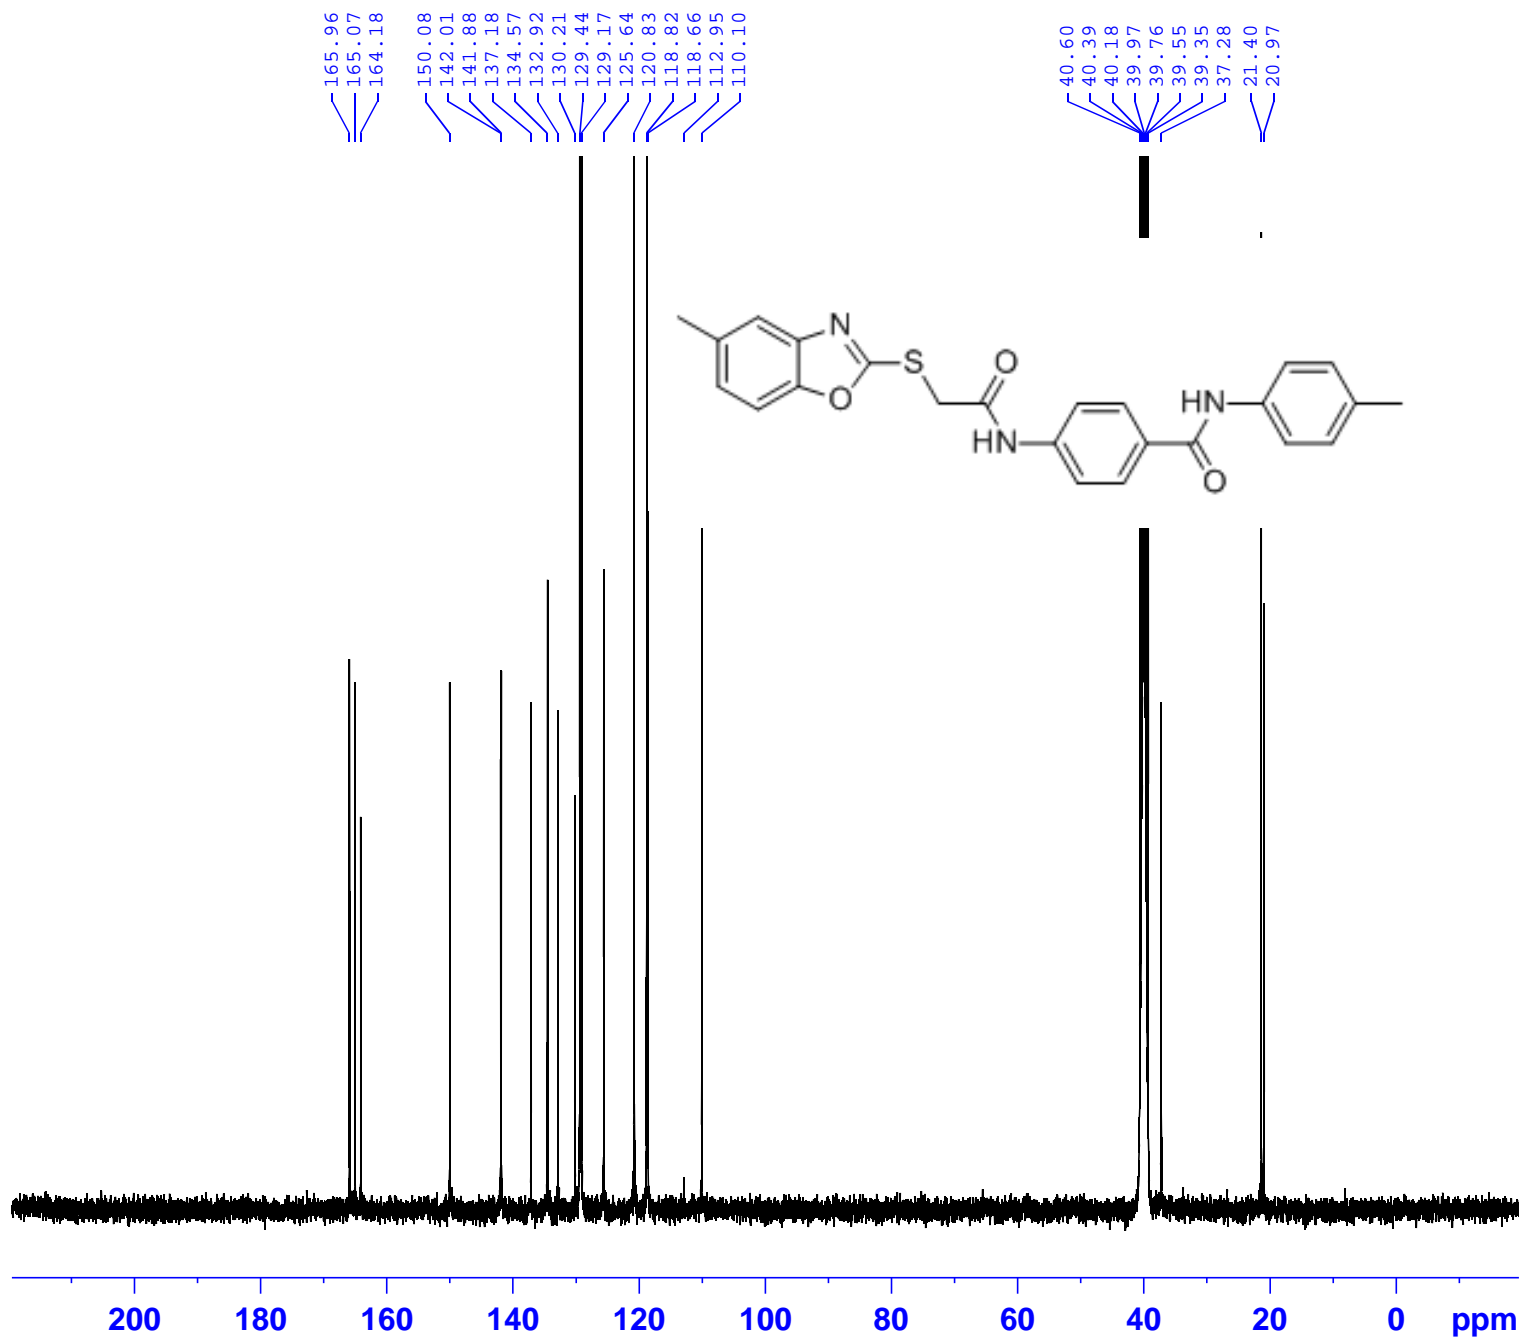

Current Data Parameters  
NAME IbrahimEisa-MBA-18-C13NMR-Em  
EXPNO 10  
PROCNO 1

F2 - Acquisition Parameters  
Date\_ 20220113  
Time 3.42 h  
INSTRUM spect  
PROBHD Z108618\_0945 (  
PULPROG zgpg30  
TD 65536  
SOLVENT DMSO  
NS 2200  
DS 4  
SWH 24038.461 Hz  
FIDRES 0.733596 Hz  
AQ 1.3631488 sec  
RG 197.77  
DW 20.800 usec  
DE 6.50 usec  
TE 0 K  
D1 2.00000000 sec  
D11 0.03000000 sec  
TD0 1  
SF01 100.6404331 MHz  
NUC1 13C  
P1 10.00 usec  
PLW1 47.00000000 W  
SF02 400.2016008 MHz  
NUC2 1H  
CPDPRG[2] waltz16  
PCPD2 90.00 usec  
PLW2 13.00000000 W  
PLW12 0.29249999 W  
PLW13 0.14713000 W

F2 - Processing parameters  
SI 32768  
SF 100.6303700 MHz  
WDW EM  
SSB 0  
LB 1.00 Hz  
GB 0  
PC 1.40

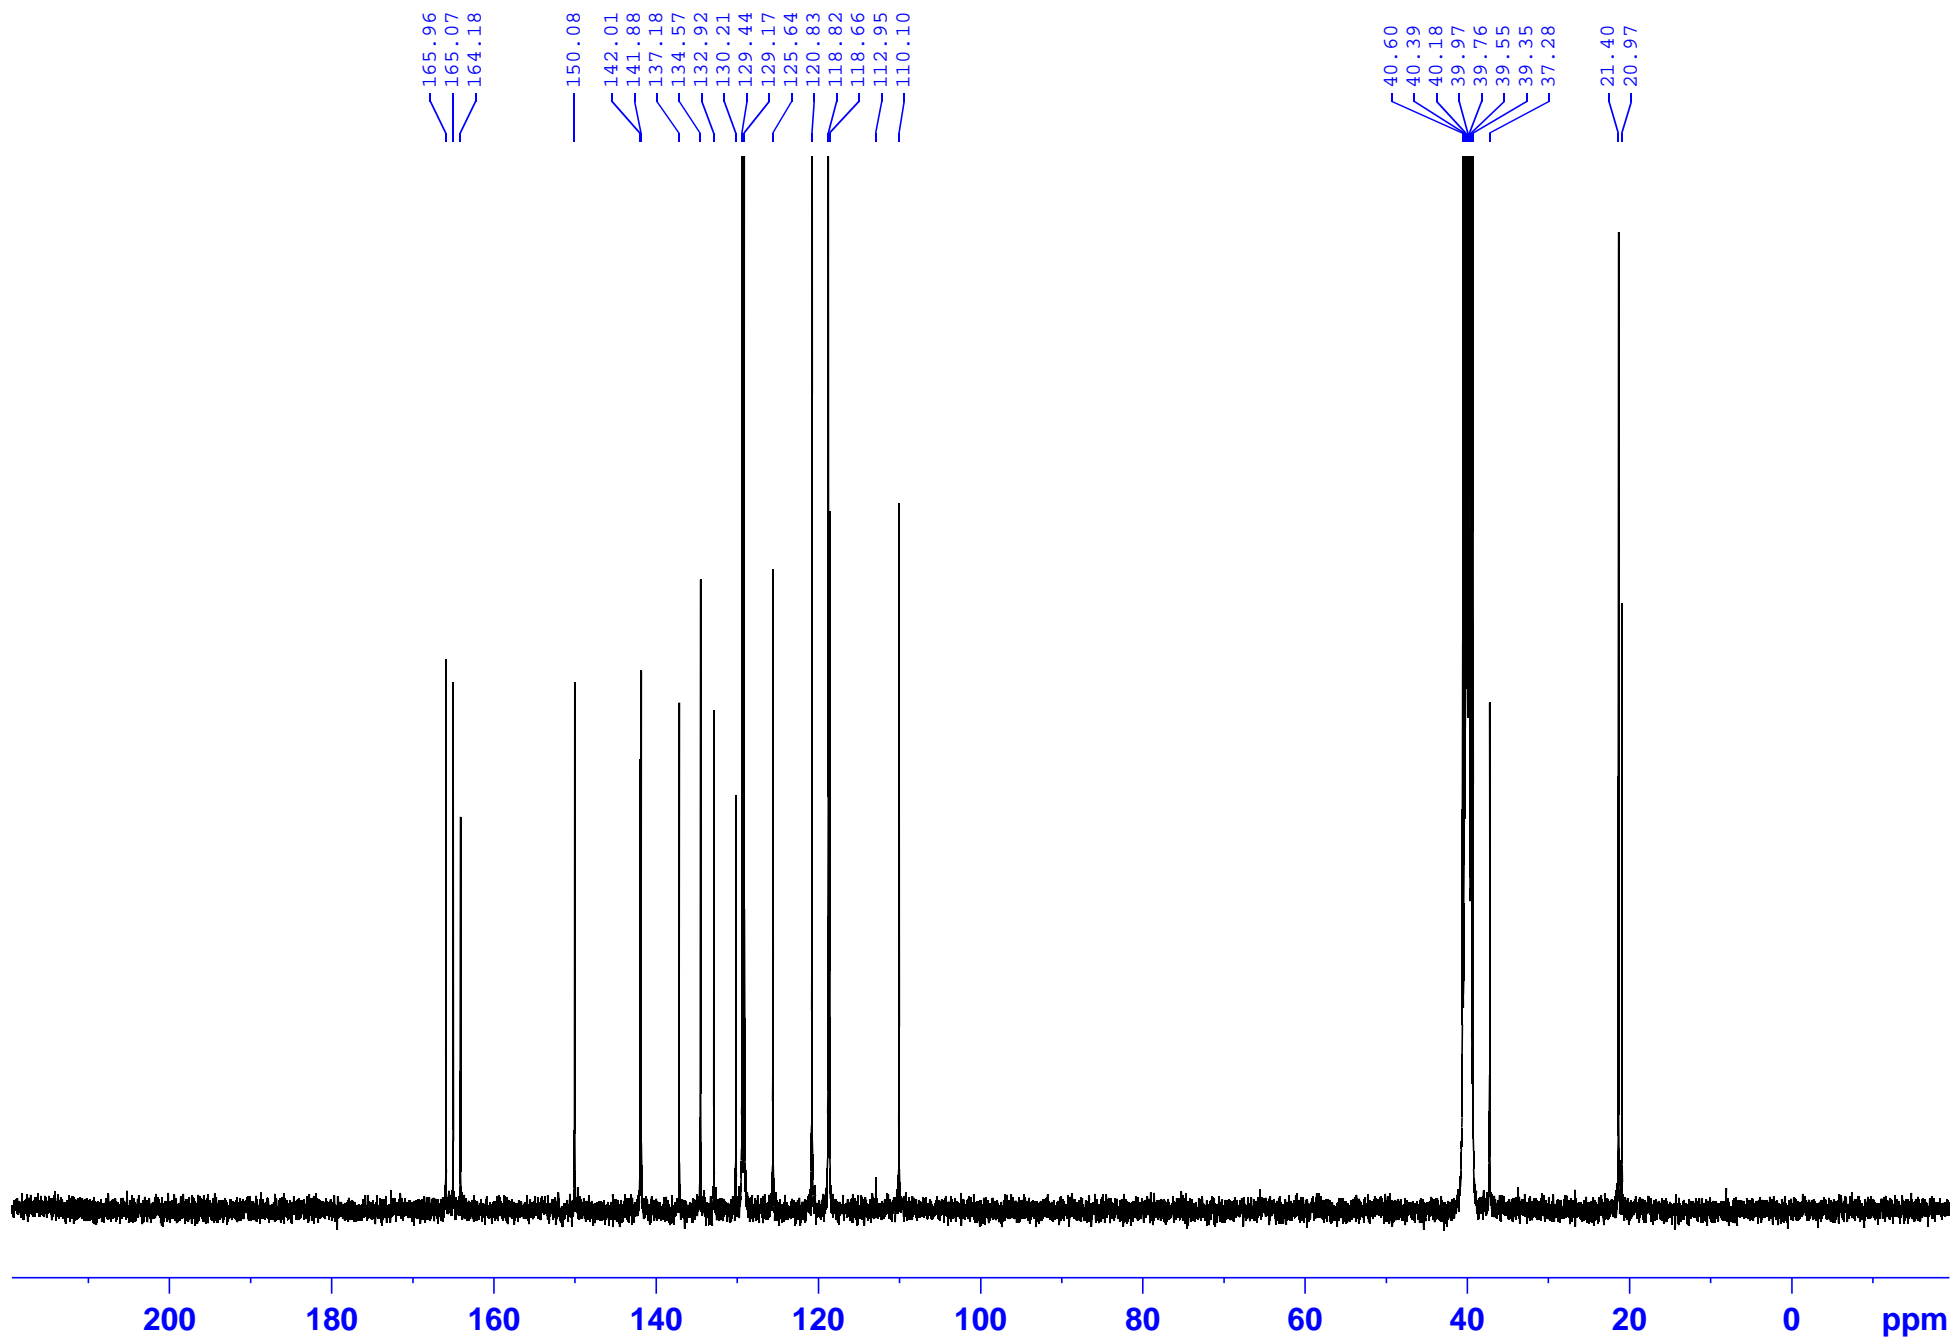

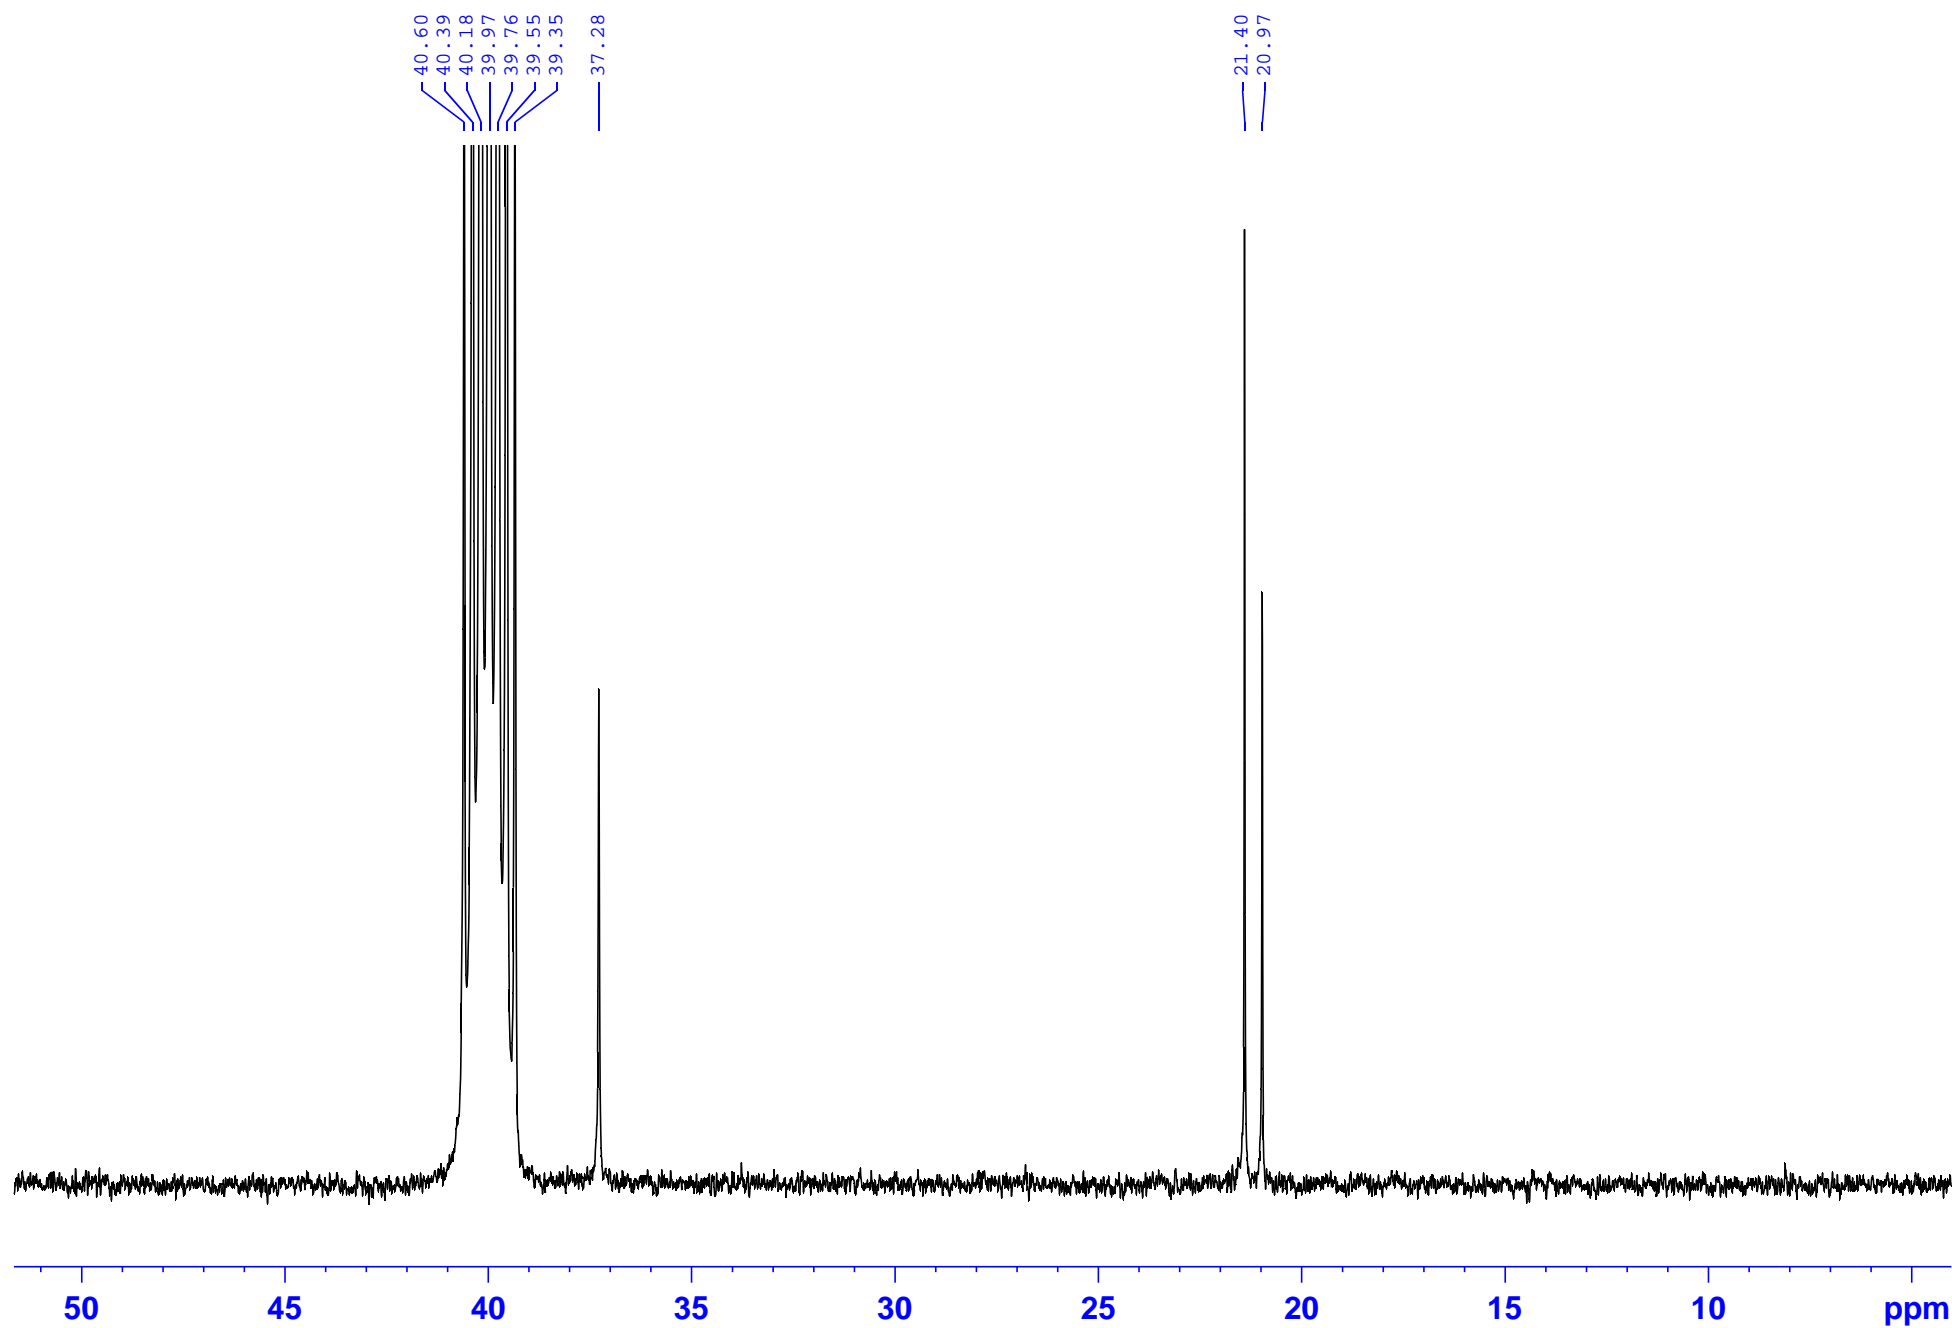

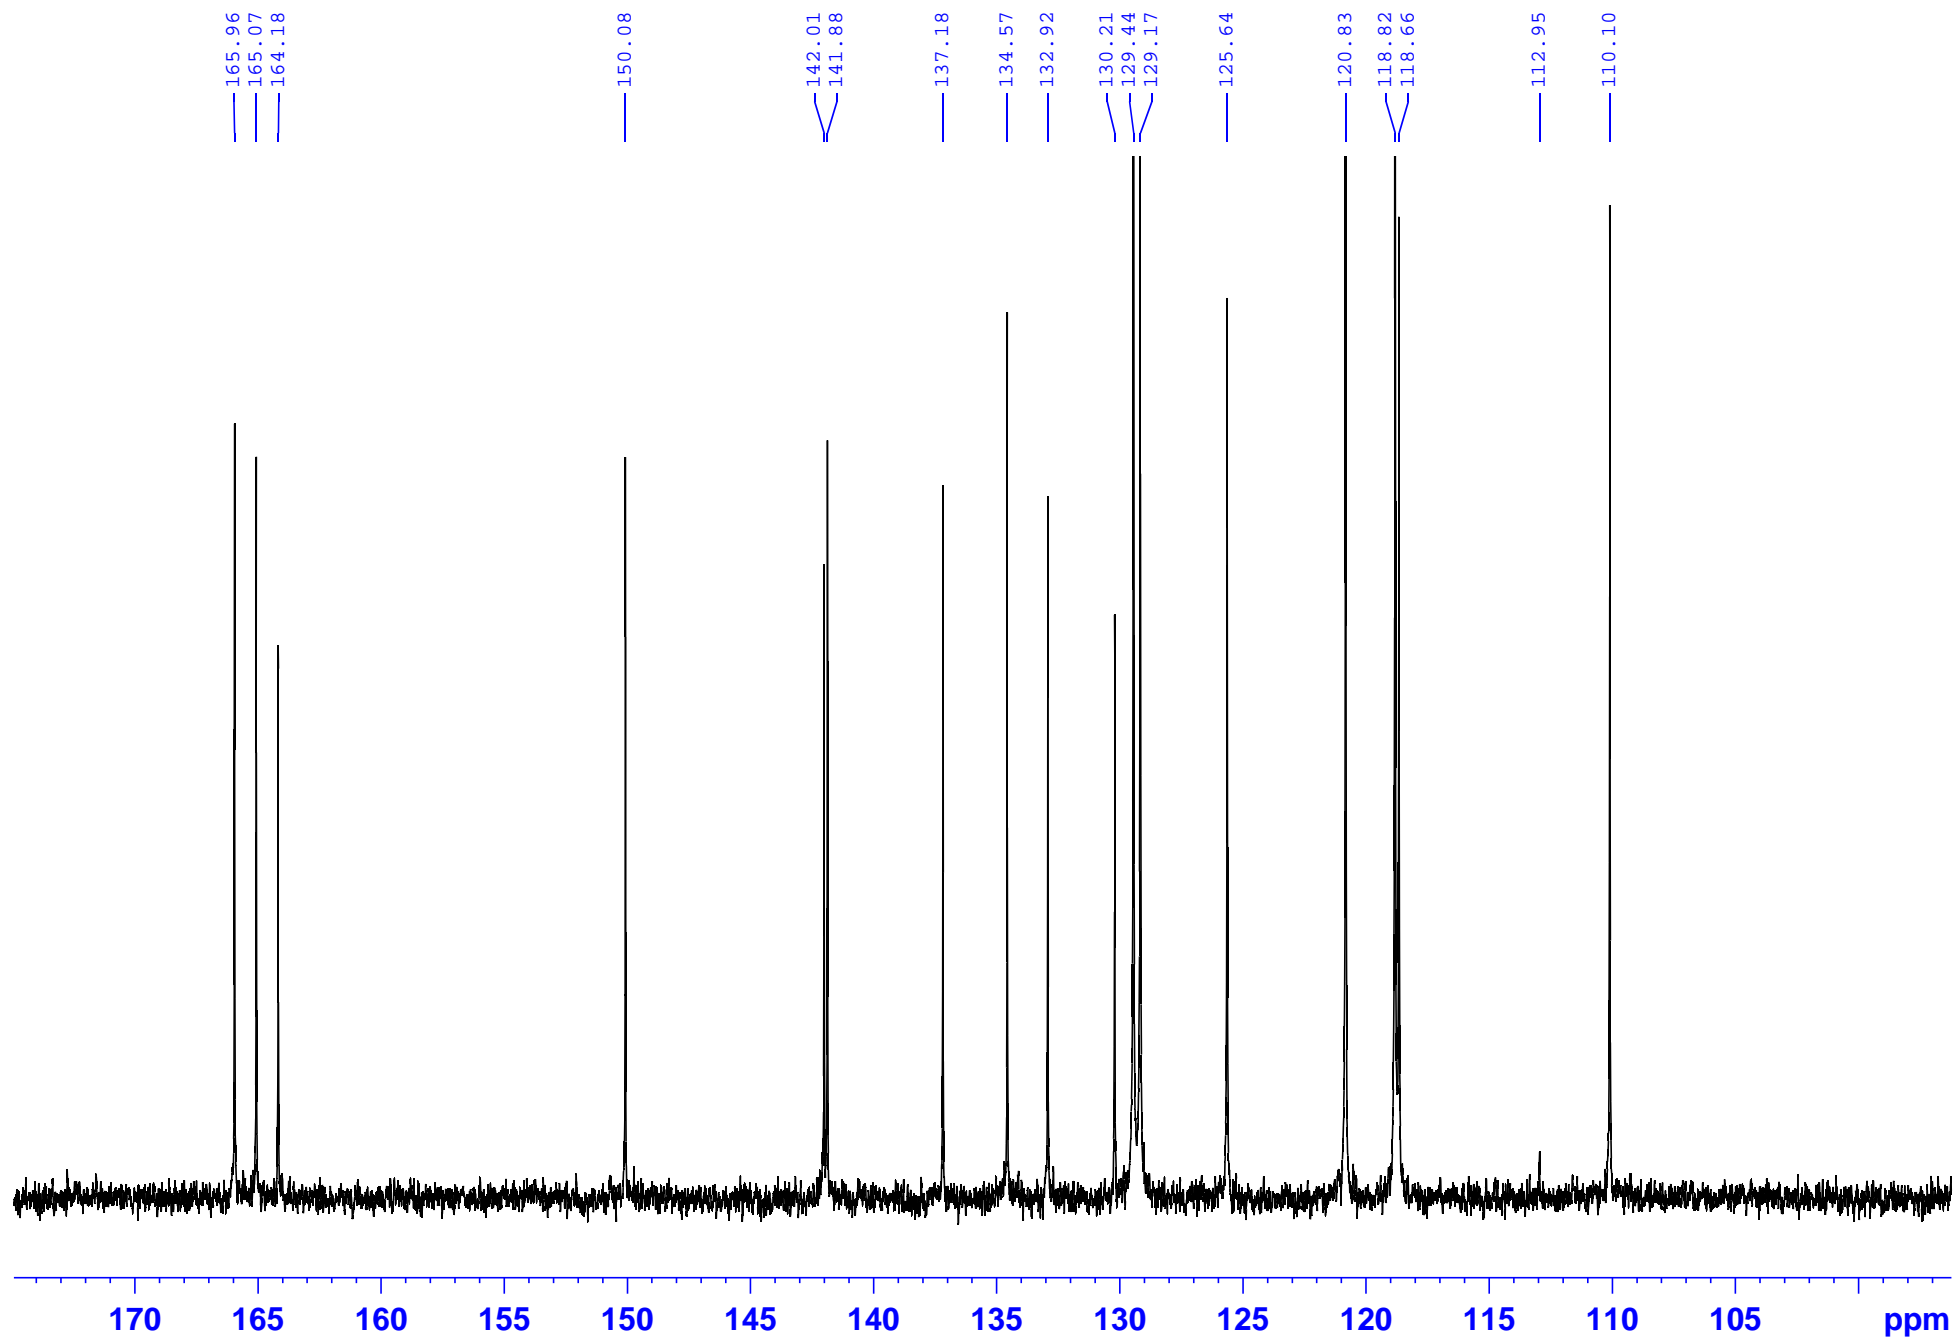

## Cairo University Micro Analytical Center

### DI Analysis Shimadzu Qp-2010 Plus

Sample Information  
 Analyzed by : Dr. Mai Younis  
 Analyzed : 01/01/2007 10:36:28  
 Sample Name : 16  
 Sample ID :  
 Customer Name : Dr. Radwan Saeed - Pharmacy - Helwan  
 Data File : C:\GCMSsolution\Data\Project1\16.QGD  
 Org Data File : C:\GCMSsolution\Data\Project1\16.QGD  
 Method File : C:\GCMSsolution\Data\Project1\High Temperature Op  
 Org Method File : C:\GCMSsolution\Data\Project1\High Temperature Op  
 Report File :  
 Tuning File : C:\GCMSsolution\System\Tune1\\_default.qgt  
 \$EndIf\$Modified by : Dr. Mai Younis  
 Modified : 01/01/2007 10:41:49

Method  
 Analytical Line 1  
 IonSourceTemp : 250.00 °C  
 [MS Table]  
 --Group 1 - Event 1--  
 Start Time : 0.00min  
 End Time : 10.00min  
 ACQ Mode : Scan  
 Event Time : 0.50sec  
 Scan Speed : 1250  
 Start m/z : 50.00  
 End m/z : 600.00

Electron Voltage : 70 eV  
 Ionization Mode : EI

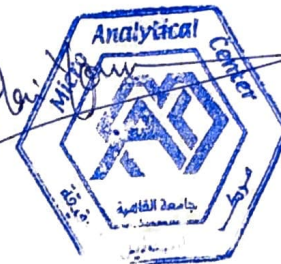

C:\GCMSsolution\Data\Project1\16.QGD

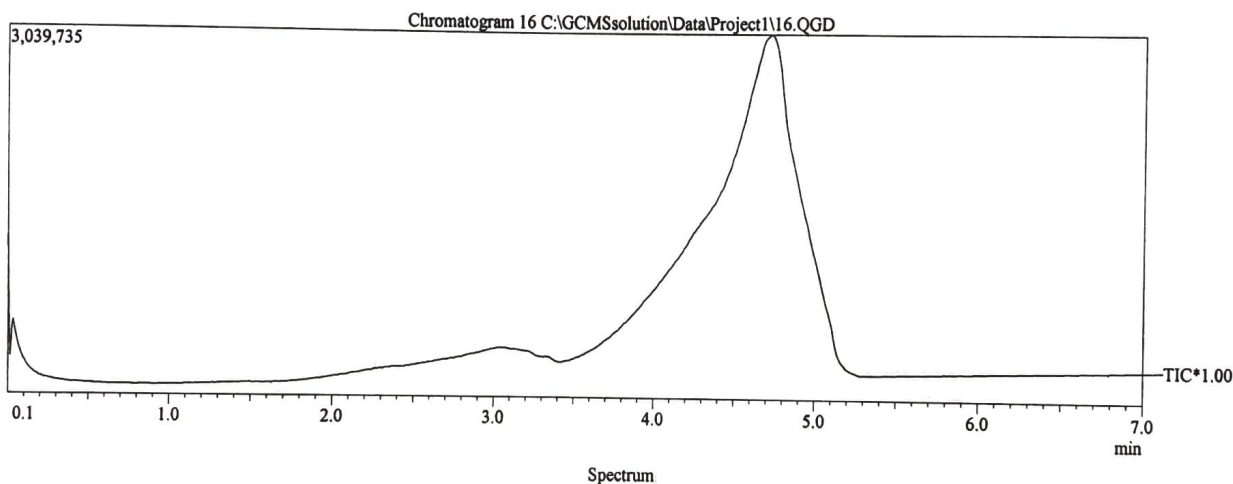

Line#:1 R.Time:4.7(Scan#:563)  
 MassPeaks:246  
 RawMode:Single 4.7(563) BasePeak:120(426804)  
 BG Mode:None Group 1 - Event 1

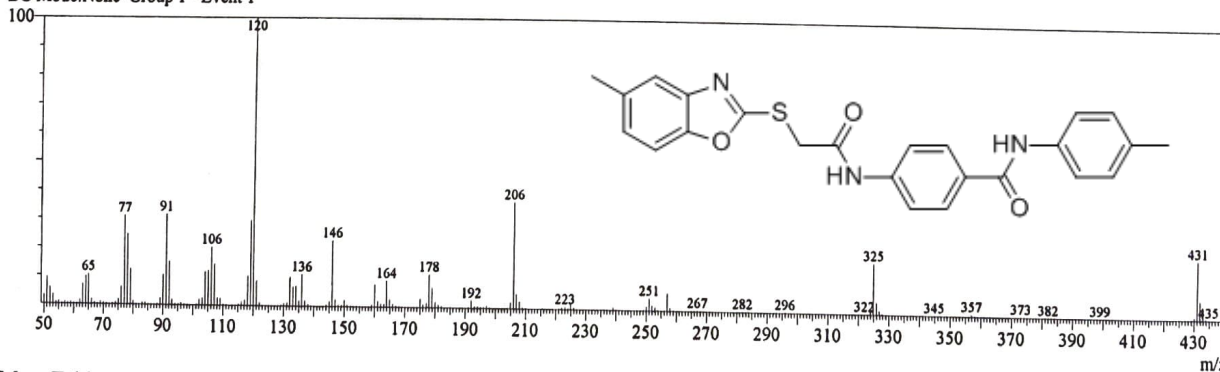

#### Mass Table

Line#:1 R.Time:4.7(Scan#:563)  
 MassPeaks:246  
 RawMode:Single 4.7(563) BasePeak:120(426804)  
 BG Mode:None Group 1 - Event 1

| # | m/z   | Abs. In | Rel. Int. | # | m/z   | Abs. In | Rel. Int. | # | m/z   | Abs. In | Rel. Int. |
|---|-------|---------|-----------|---|-------|---------|-----------|---|-------|---------|-----------|
| 1 | 50.05 | 13500   | 3.16      | 4 | 53.00 | 14255   | 3.34      | 7 | 56.05 | 1336    | 0.31      |
| 2 | 51.00 | 39703   | 9.30      | 5 | 54.00 | 3390    | 0.79      | 8 | 57.00 | 3882    | 0.91      |
| 3 | 52.00 | 24783   | 5.81      | 6 | 55.00 | 3753    | 0.88      | 9 | 58.00 | 2242    | 0.53      |

# IR of compound 8d

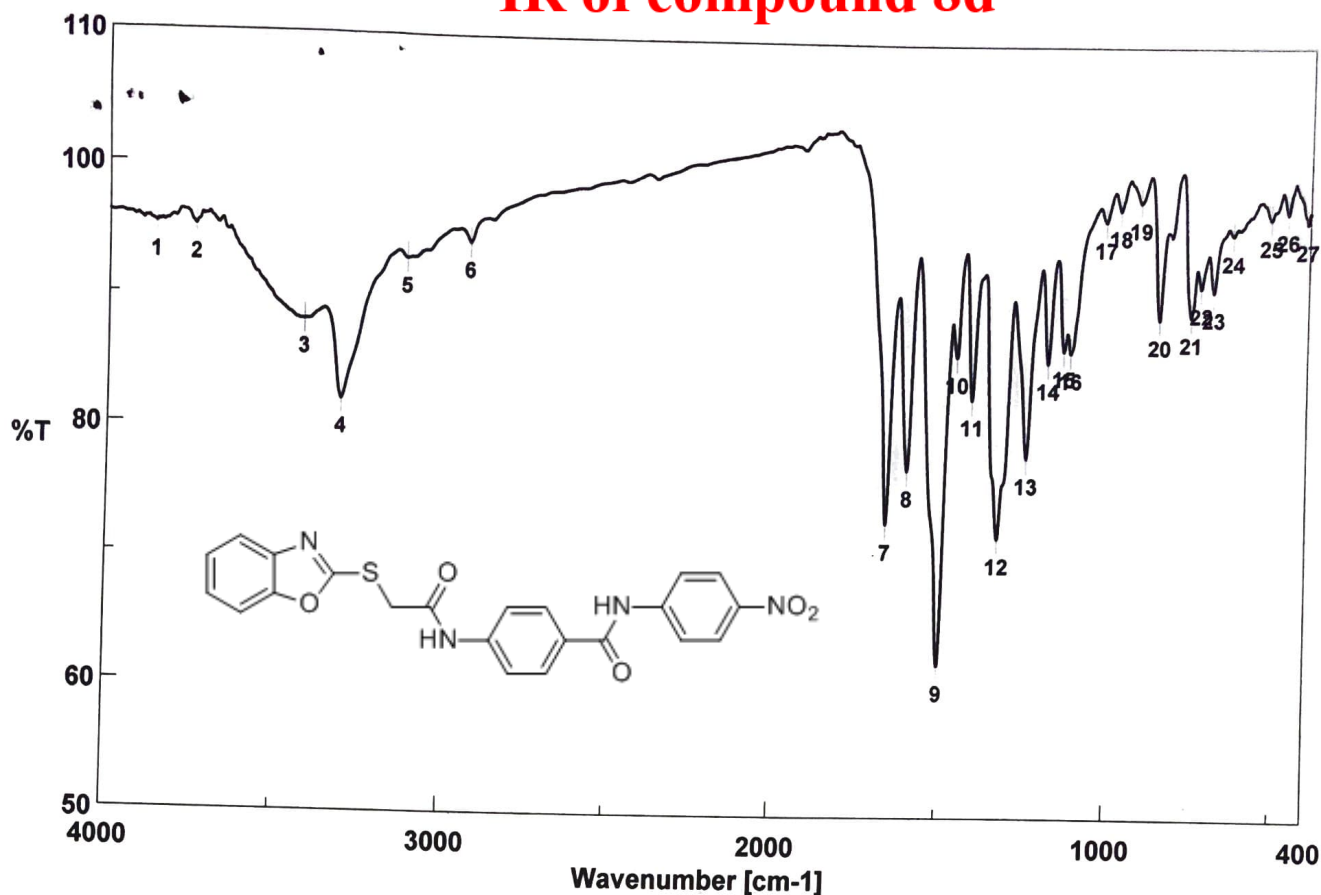

Accumulation 16  
Resolution 4 cm-1  
Zero Filling ON  
Apodization Cosine  
Gain Auto (2)  
Scanning Speed Auto (2 mm/sec)  
Date/Time 8/22/2021 2:00PM  
Update 8/22/2021 2:01PM  
Operator IR  
File Name Memory#115  
Sample Name PBA -9  
Comment

| No. | cm-1    | %T      | No. | cm-1    | %T      | No. | cm-1    | %T      |
|-----|---------|---------|-----|---------|---------|-----|---------|---------|
| 1   | 3859.83 | 95.3512 | 2   | 3741.23 | 95.2107 | 3   | 3414.35 | 88.0396 |
| 4   | 3301.54 | 81.8922 | 5   | 3110.62 | 92.805  | 6   | 2921.63 | 94.0428 |
| 7   | 1660.41 | 72.8121 | 8   | 1598.7  | 76.9692 | 9   | 1500.35 | 61.8386 |
| 10  | 1453.1  | 85.8791 | 11  | 1406.82 | 82.5525 | 12  | 1327.75 | 71.7719 |
| 13  | 1243.86 | 78.0168 | 14  | 1180.22 | 85.4902 | 15  | 1132.97 | 86.4753 |
| 16  | 1113.69 | 86.3208 | 17  | 1011.48 | 96.6311 | 18  | 968.09  | 97.5213 |
| 19  | 908.308 | 98.1491 | 20  | 846.597 | 89.0129 | 21  | 752.102 | 89.2418 |
| 22  | 723.175 | 91.5375 | 23  | 684.606 | 91.258  | 24  | 628.68  | 95.6302 |
| 25  | 516.829 | 96.8607 | 26  | 466.689 | 97.3232 | 27  | 408.835 | 96.563  |

فاحي  
فاحي

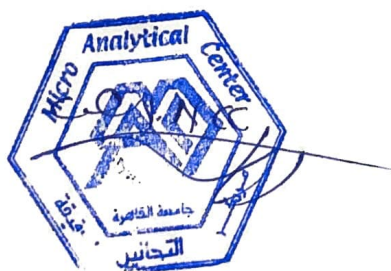

# <sup>1</sup>H NMR of compound 8d

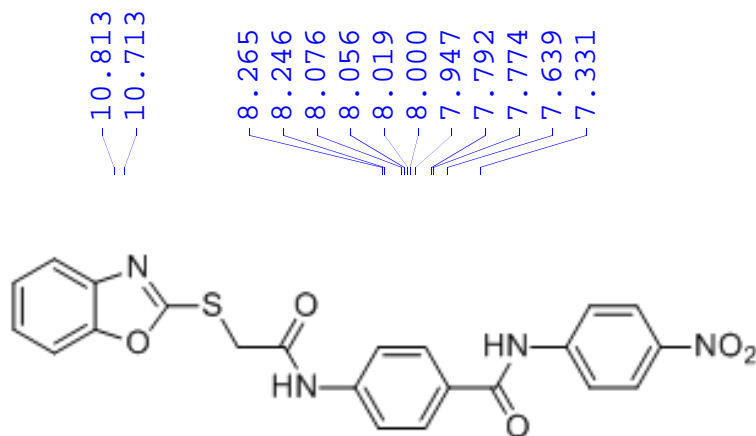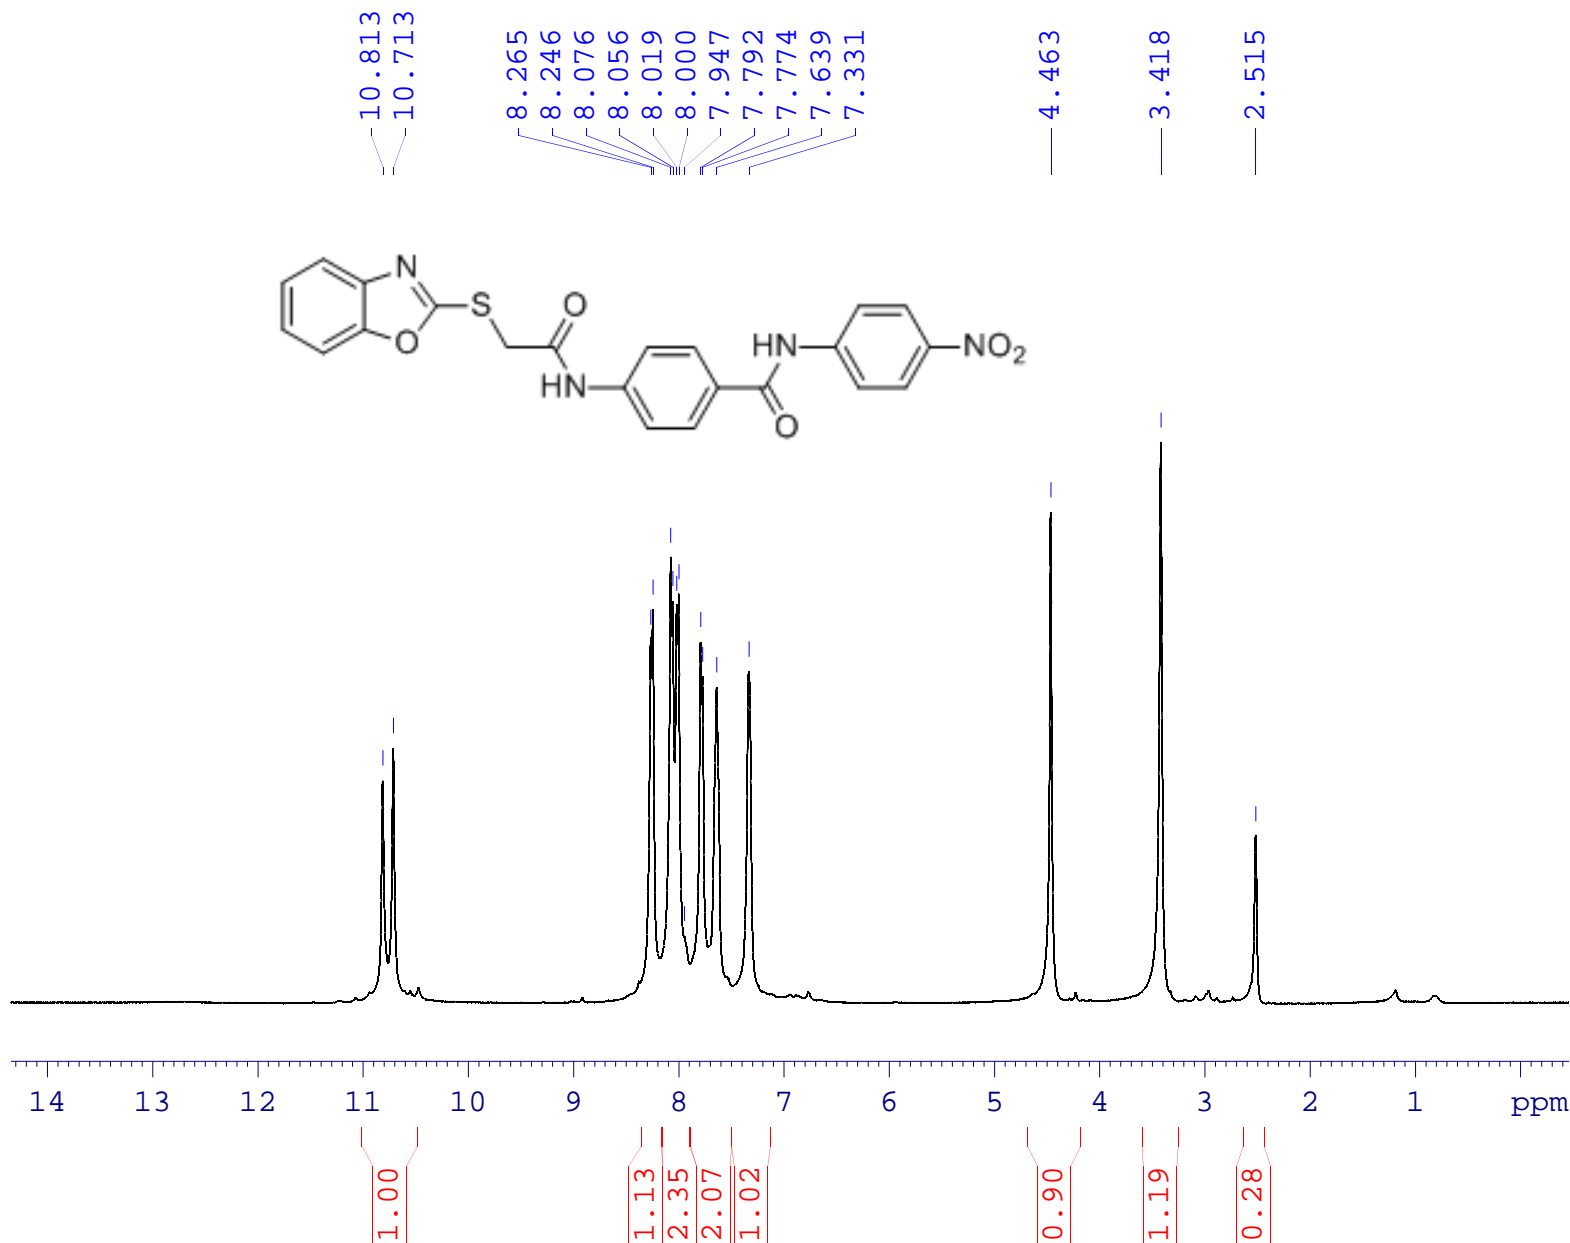

Current Data Parameters  
 NAME Ebrahim Eissa- PBA-9-proton-DMSO-D  
 EXPNO 10  
 PROCNO 1

F2 - Acquisition Parameters  
 Date\_ 20220112  
 Time 8.55 h  
 INSTRUM spect  
 PROBHD Z108618\_0945 (  
 PULPROG zg30  
 TD 65536  
 SOLVENT DMSO  
 NS 16  
 DS 2  
 SWH 8012.820 Hz  
 FIDRES 0.244532 Hz  
 AQ 4.0894465 sec  
 RG 78.59  
 DW 62.400 usec  
 DE 6.50 usec  
 TE 633.0 K  
 D1 1.00000000 sec  
 TD0 1  
 SFO1 400.2024712 MHz  
 NUC1 1H  
 P1 13.50 usec  
 PLW1 13.00000000 W

F2 - Processing parameters  
 SI 65536  
 SF 400.2000000 MHz  
 WDW EM  
 SSB 0  
 LB 0.30 Hz  
 GB 0  
 PC 1.00

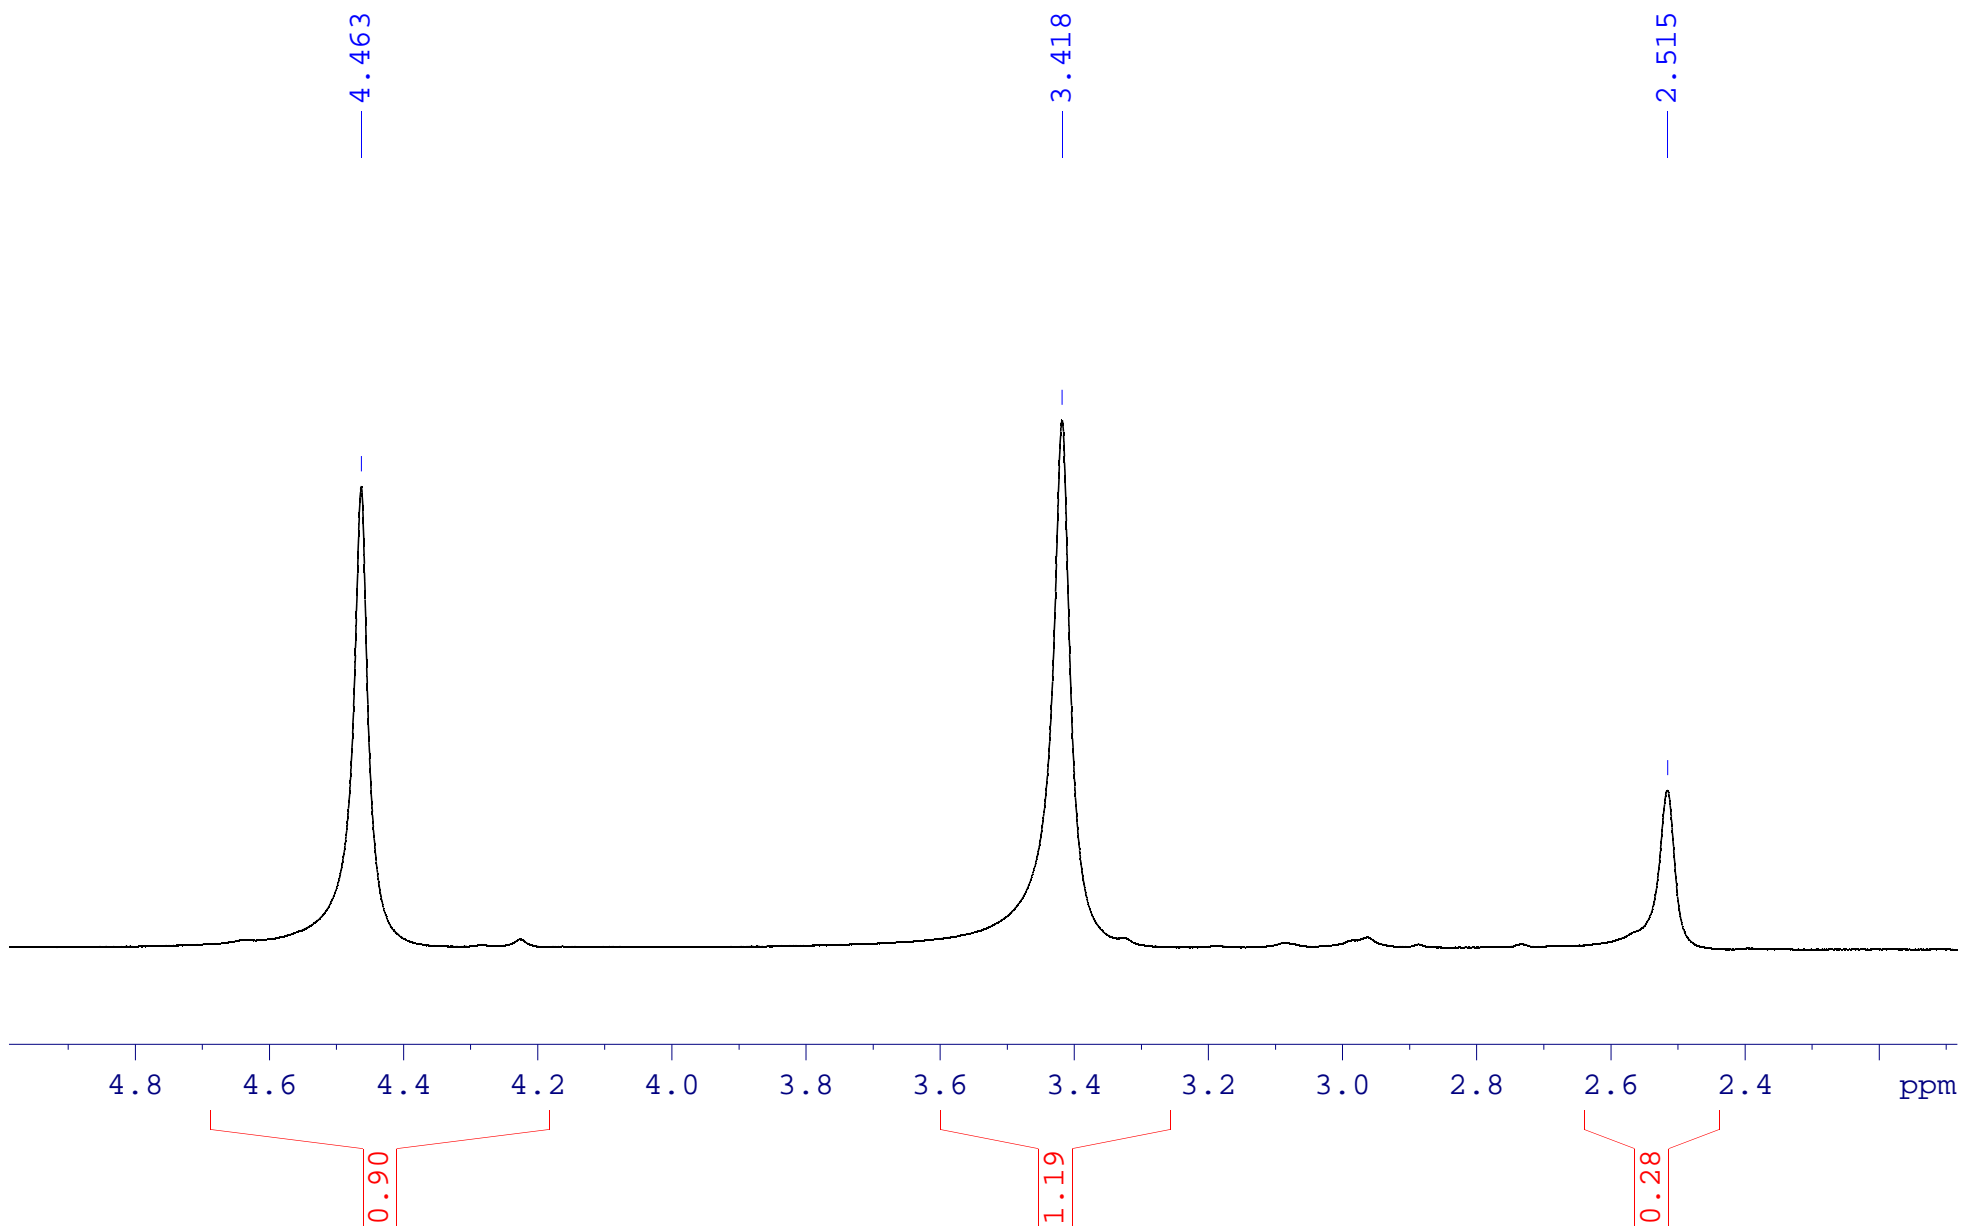



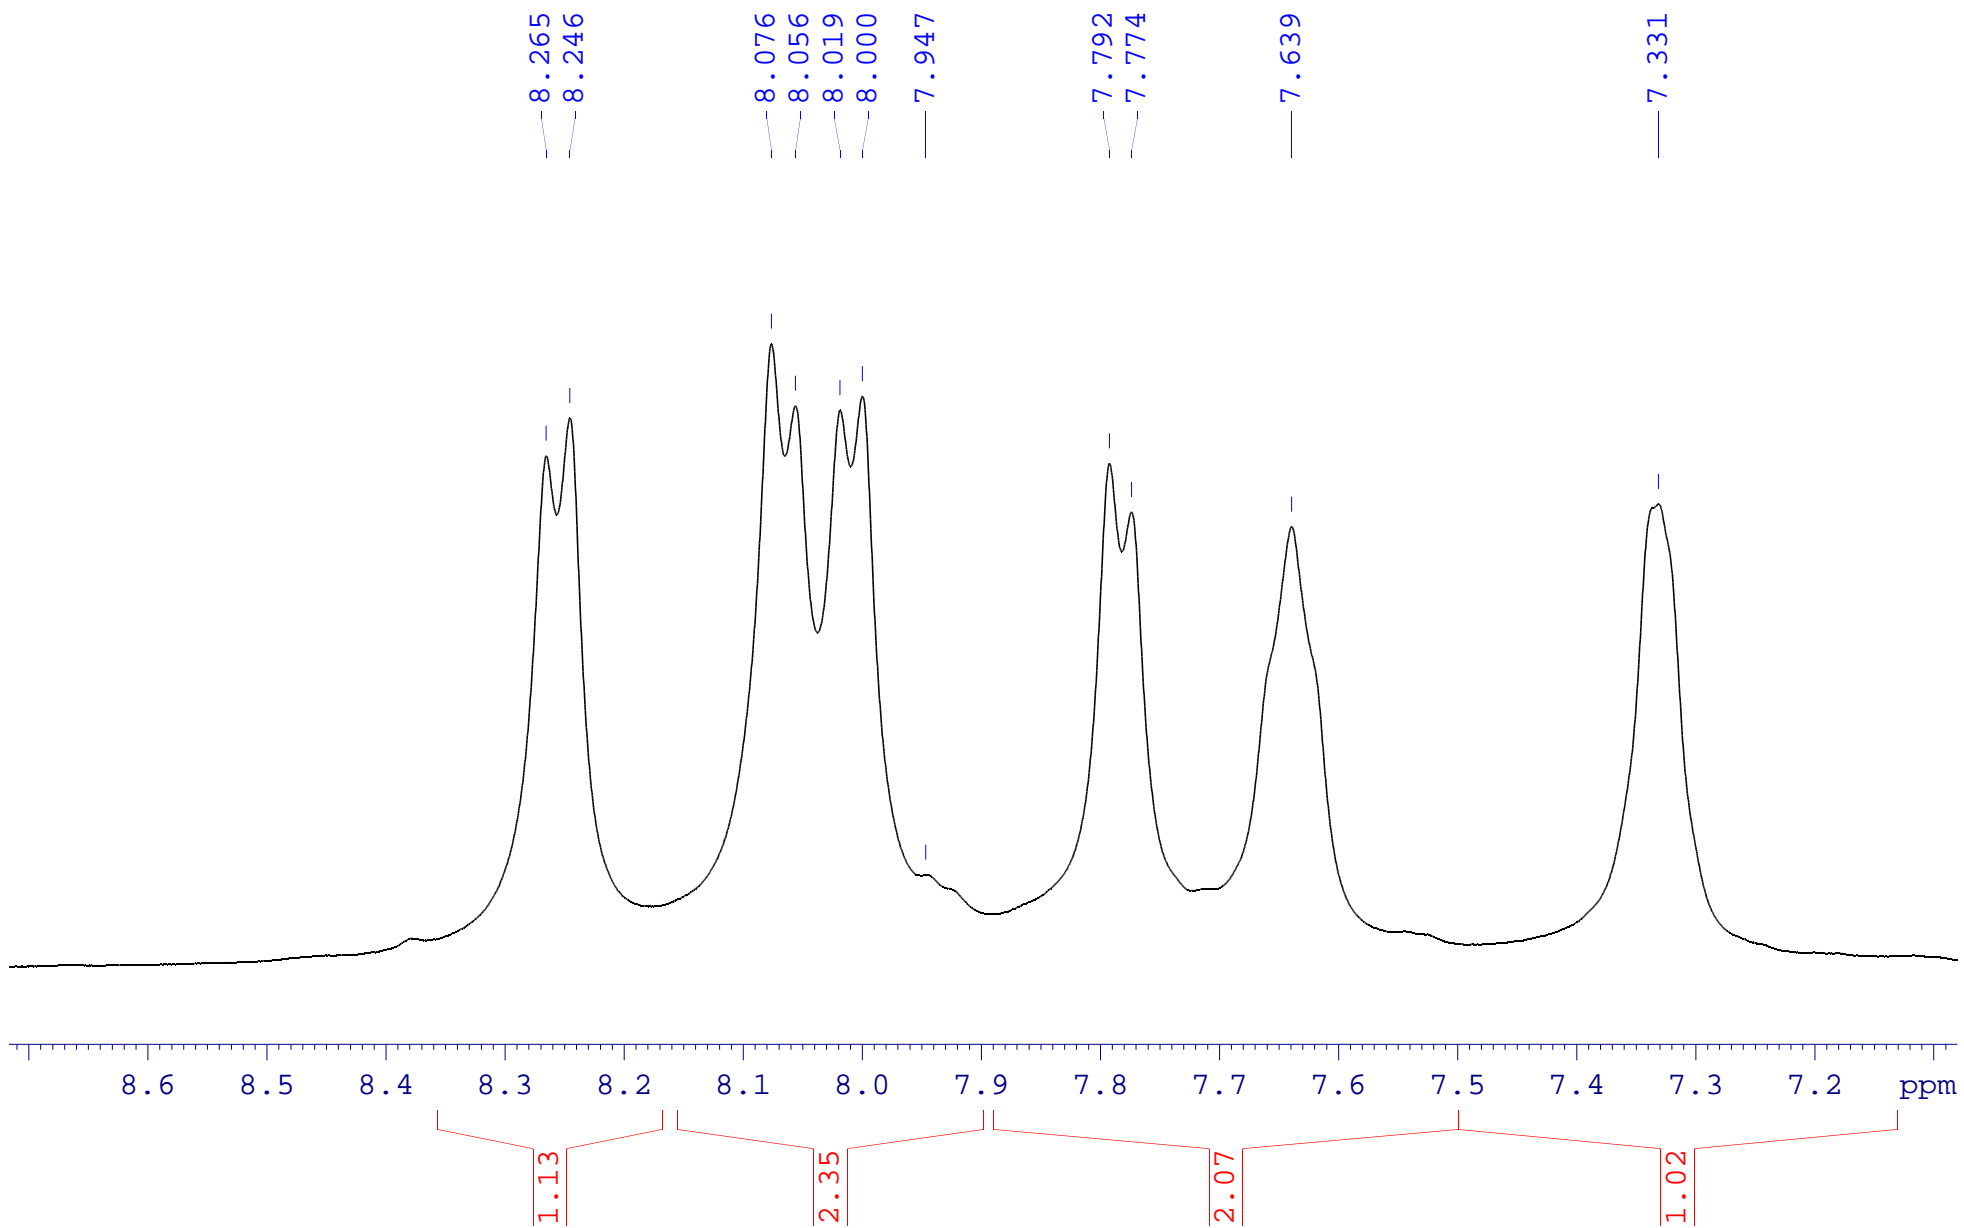

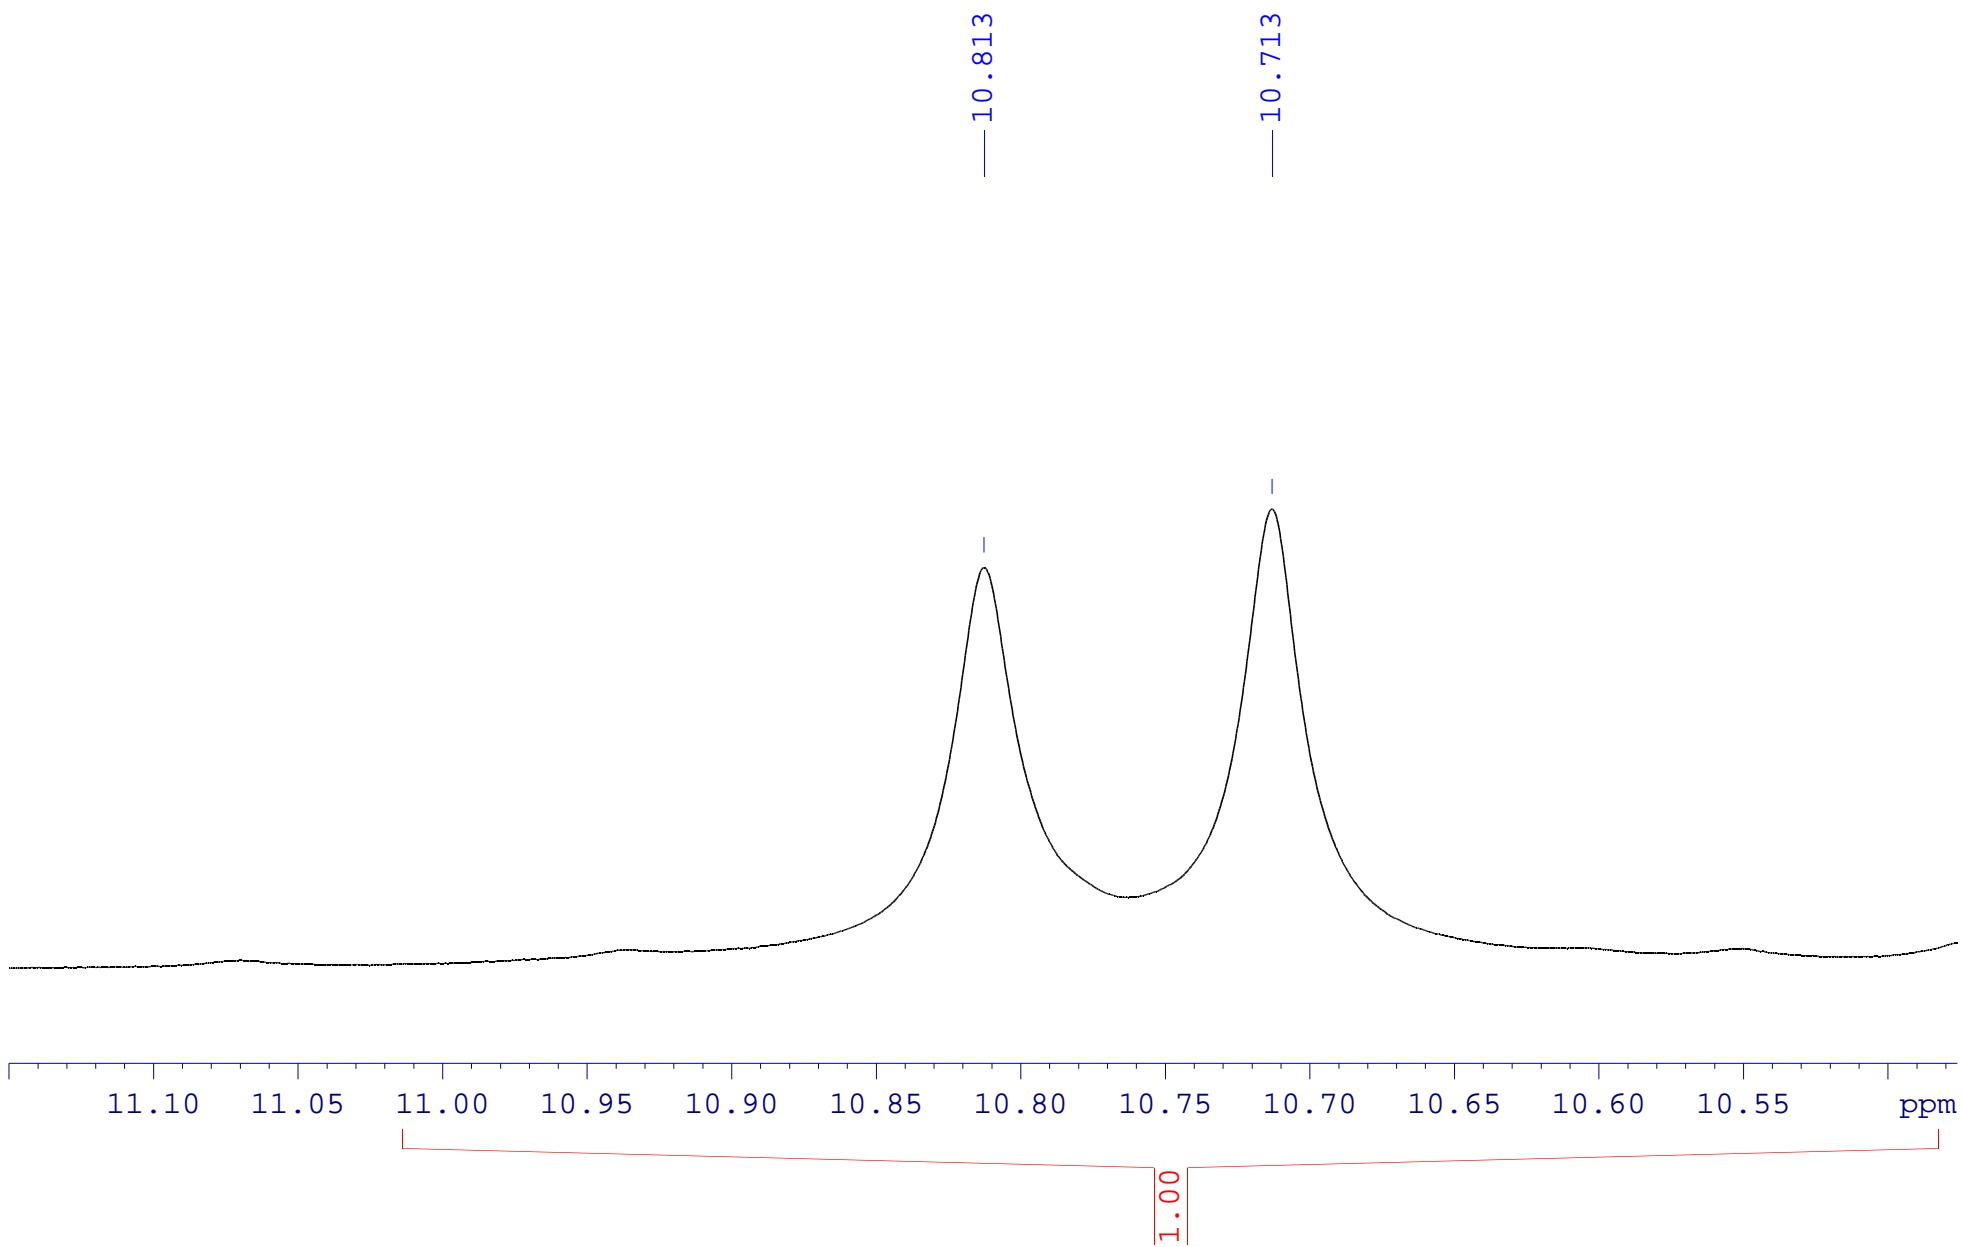

### <sup>13</sup>C NMR of compound 8d

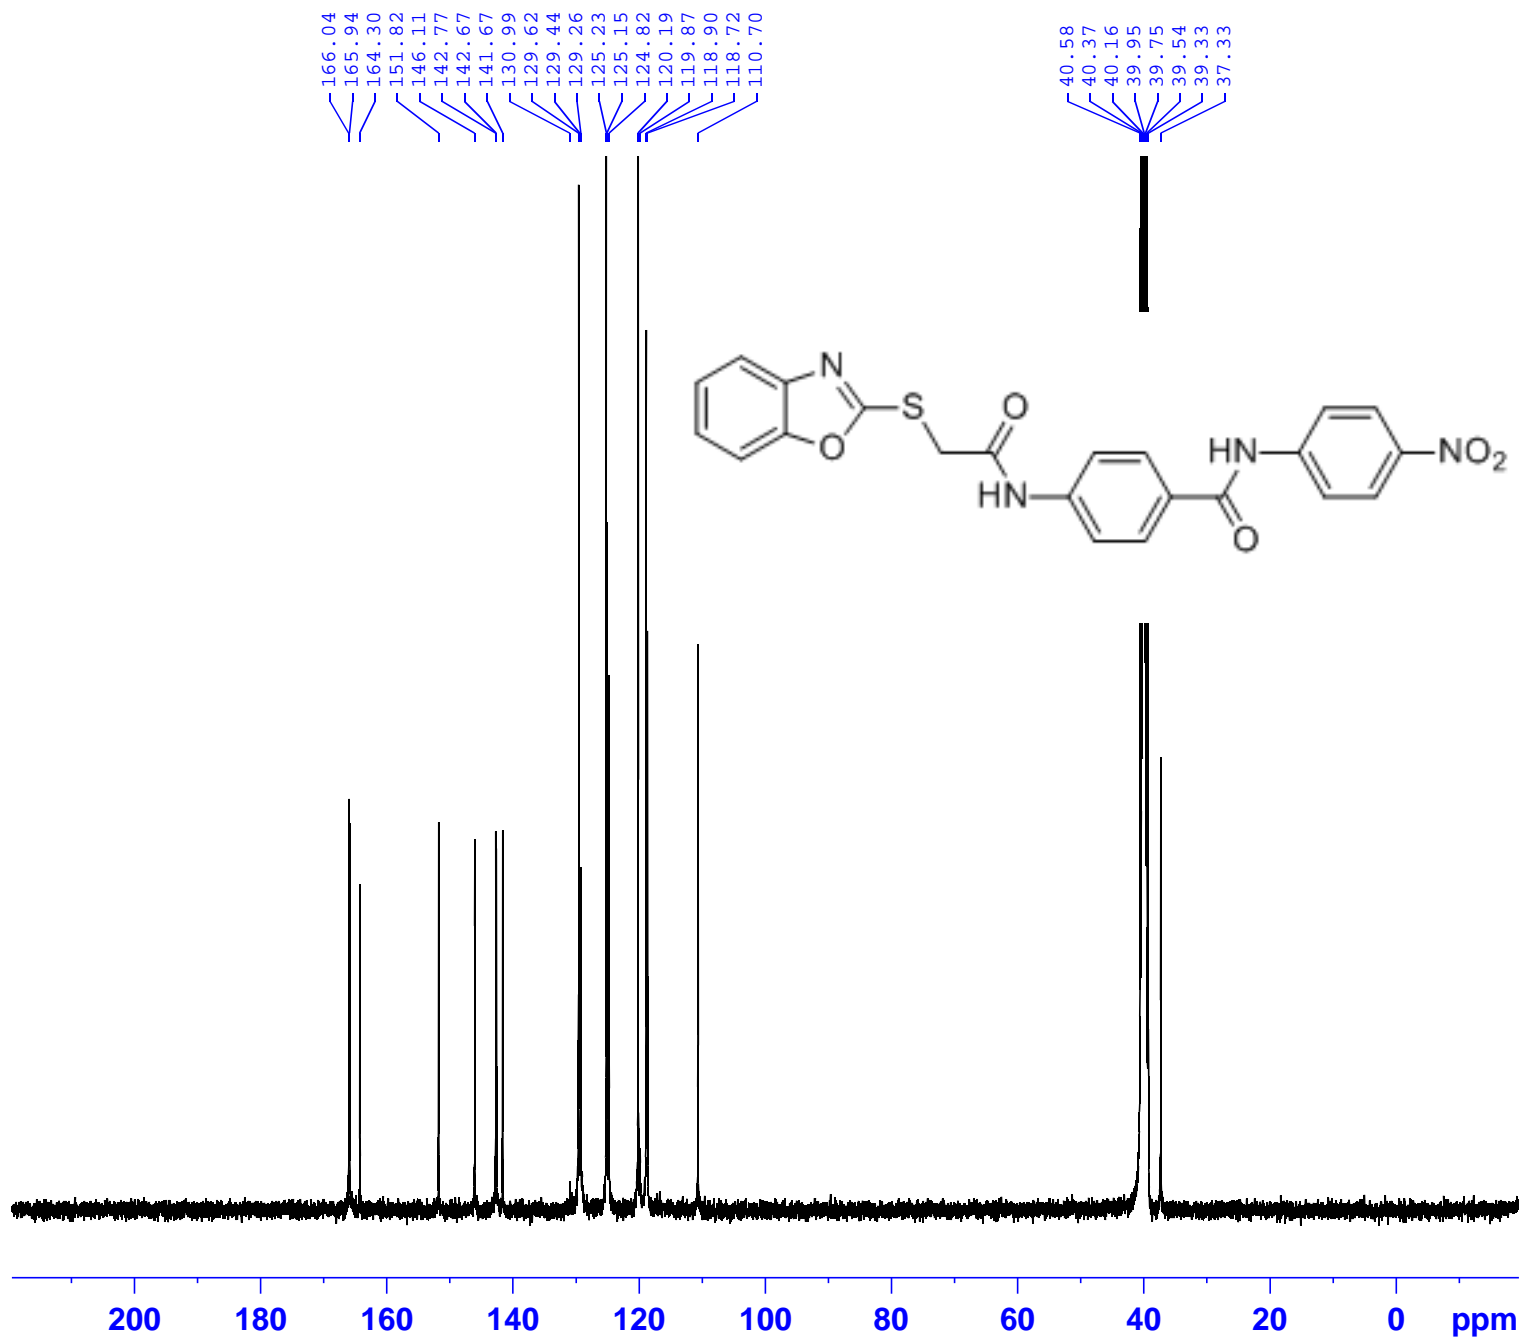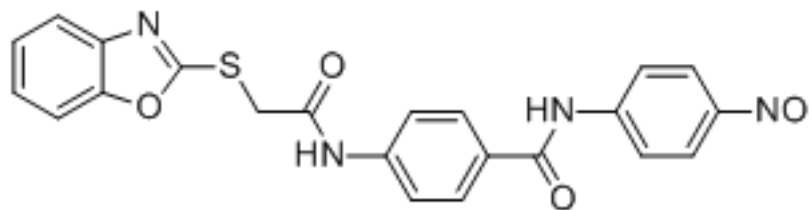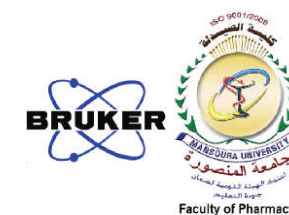

```
Current Data Parameters
NAME      IbrahimEisa-PBA-9-C13NMR-Em
EXPNO          10
PROCNO         1
```

## F2 - Acquisition Parameters

Date\_ 20220112

Time 21.14 h

INSTRUM spect

PROBHD Z108618\_0945 (

|         |        |
|---------|--------|
| PULPROG | zgpg30 |
| TD      | 65536  |

|         |       |
|---------|-------|
| TD      | 65536 |
| SOLVENT | DMSO  |

|         |      |
|---------|------|
| SOLVENT | DMSO |
| NS      | 2200 |

|    |      |
|----|------|
| NS | 2200 |
| DS | 4    |

SWH 24038.461 Hz

|        |           |    |
|--------|-----------|----|
| SWH    | 24050.401 | Hz |
| FIDRES | 0.733596  | Hz |

AQ 1.3631488 sec

|    |        |
|----|--------|
| RG | 197.77 |
|----|--------|

|     |             |
|-----|-------------|
| DW  | 20.800 usec |
| ... | ...         |

|    |           |
|----|-----------|
| DE | 6.50 usec |
| TE | 0.15      |

```
TE      0 K
D1      2.000000000 500
```

|     |             |     |
|-----|-------------|-----|
| D1  | 2.000000000 | sec |
| D11 | 0.030000000 | sec |

|     |            |     |
|-----|------------|-----|
| D11 | 0.03000000 | sec |
| TR0 | 1          |     |

SFO1 100.6404331 MHz

NUC1 13C

```

P1          10.00 usec

```

PLW1            47.00000000 W

SFO2 400.2016008 MHz

|      |    |
|------|----|
| NUC2 | 1H |
| CHH2 | 1H |

```
CPDPRG[2          waltz16
PCPD2           00 00 0000
```

```
PCPD2          90.00 usec
PLW2          13.000000000 W
```

|       |             |   |
|-------|-------------|---|
| PLW2  | 13.00000000 | W |
| PLW12 | 0.29249999  | W |

|       |            |   |
|-------|------------|---|
| PLW12 | 0.29249999 | W |
| PLW13 | 0.14713000 | W |

FLW13 0.14713000 W

## F2 - Processing parameters

SI 32768

SF 100.6303700 MHz

WDW EM

SSB 0  
LB 1.00 U-

|    |      |    |
|----|------|----|
| LB | 1.00 | Hz |
| CB | 0    |    |

|    |   |      |
|----|---|------|
| GB | 0 |      |
| PC |   | 1 40 |

|    |      |
|----|------|
| PC | 1.40 |
|----|------|

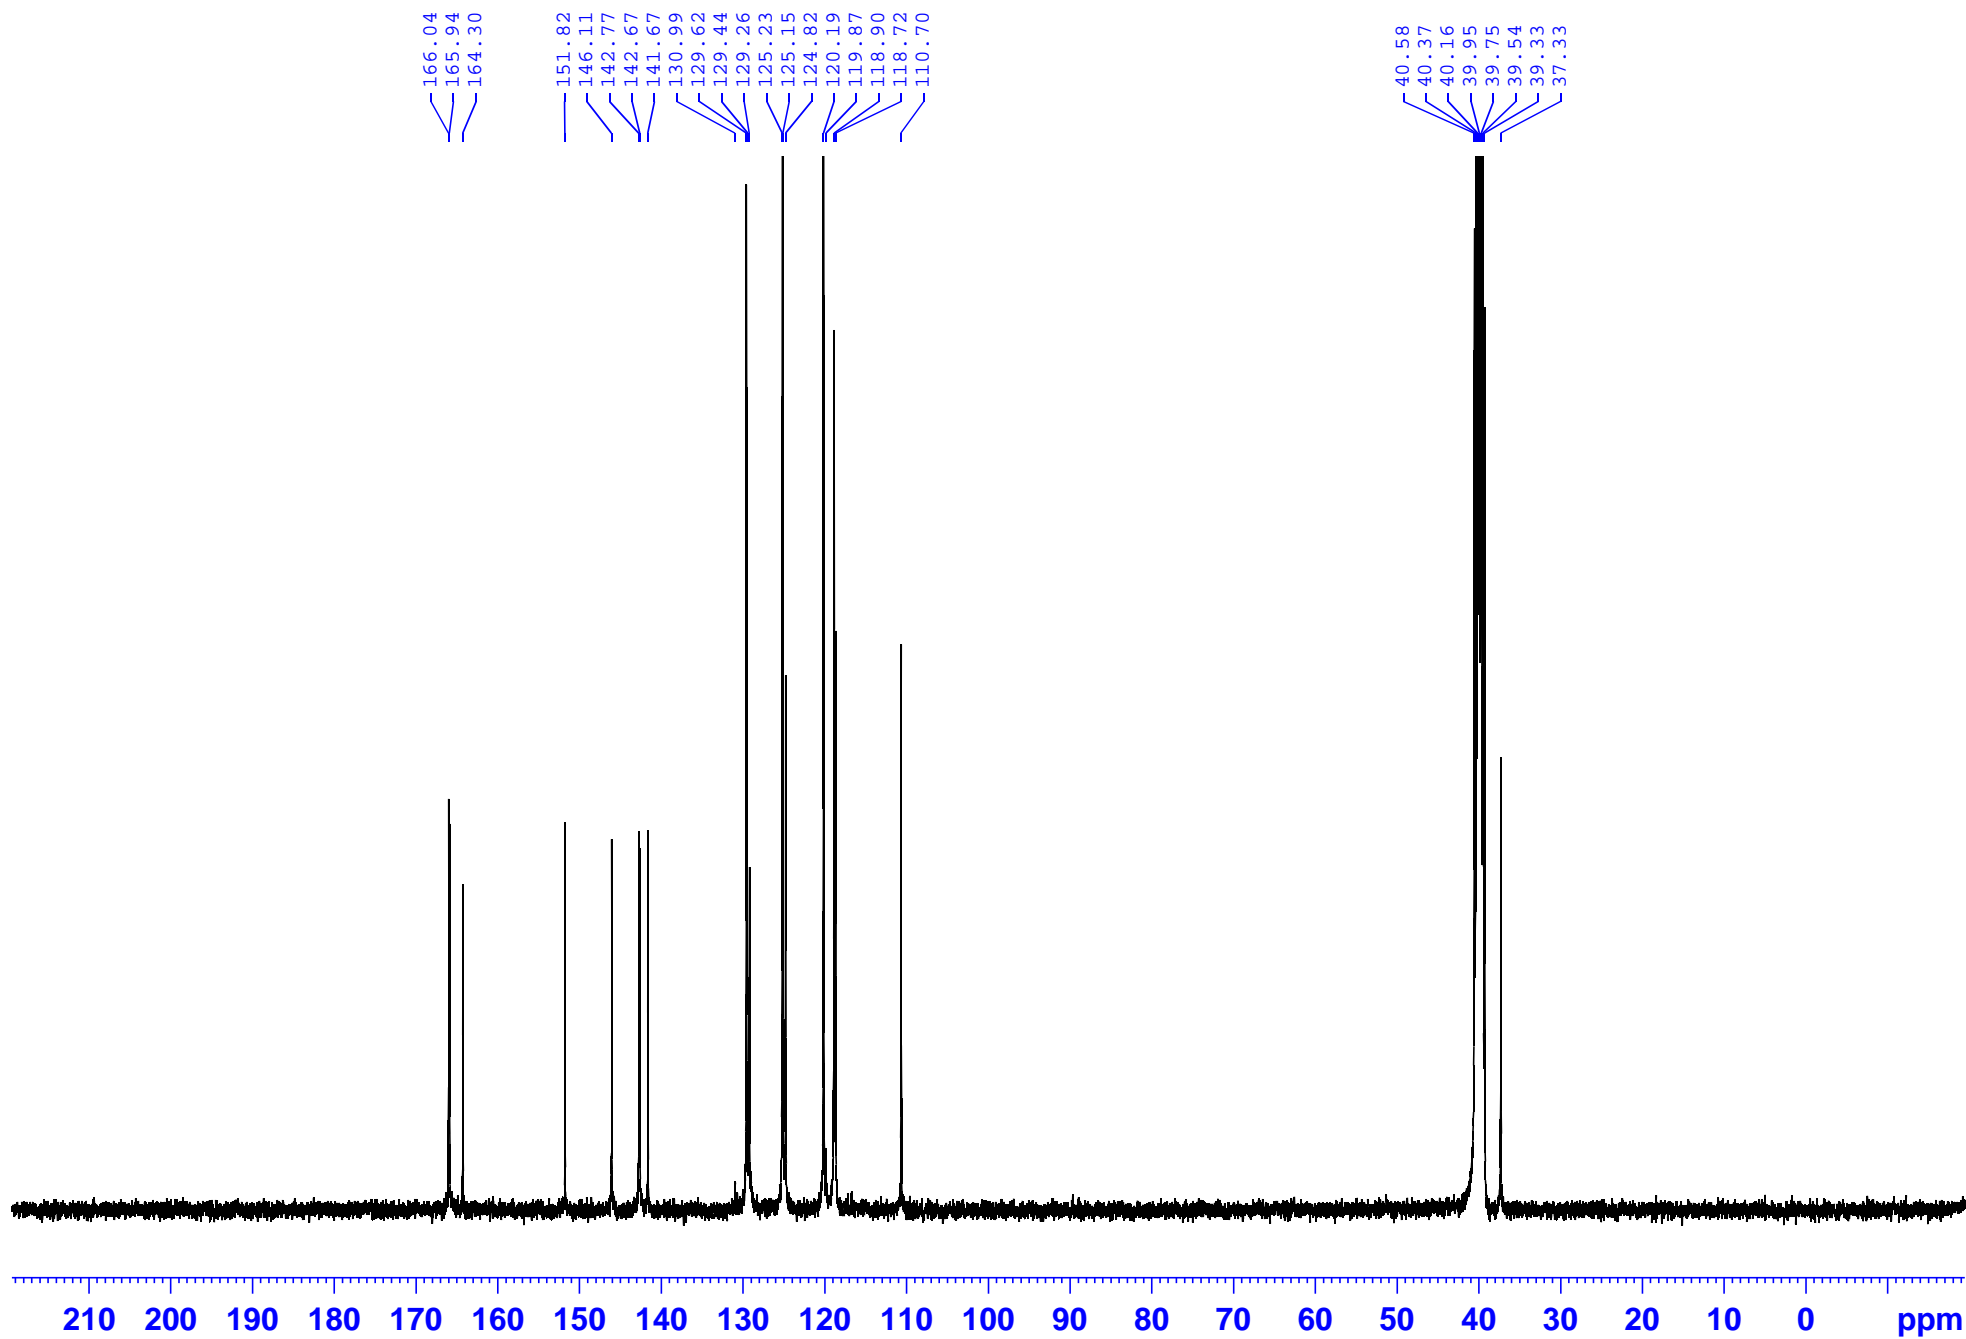

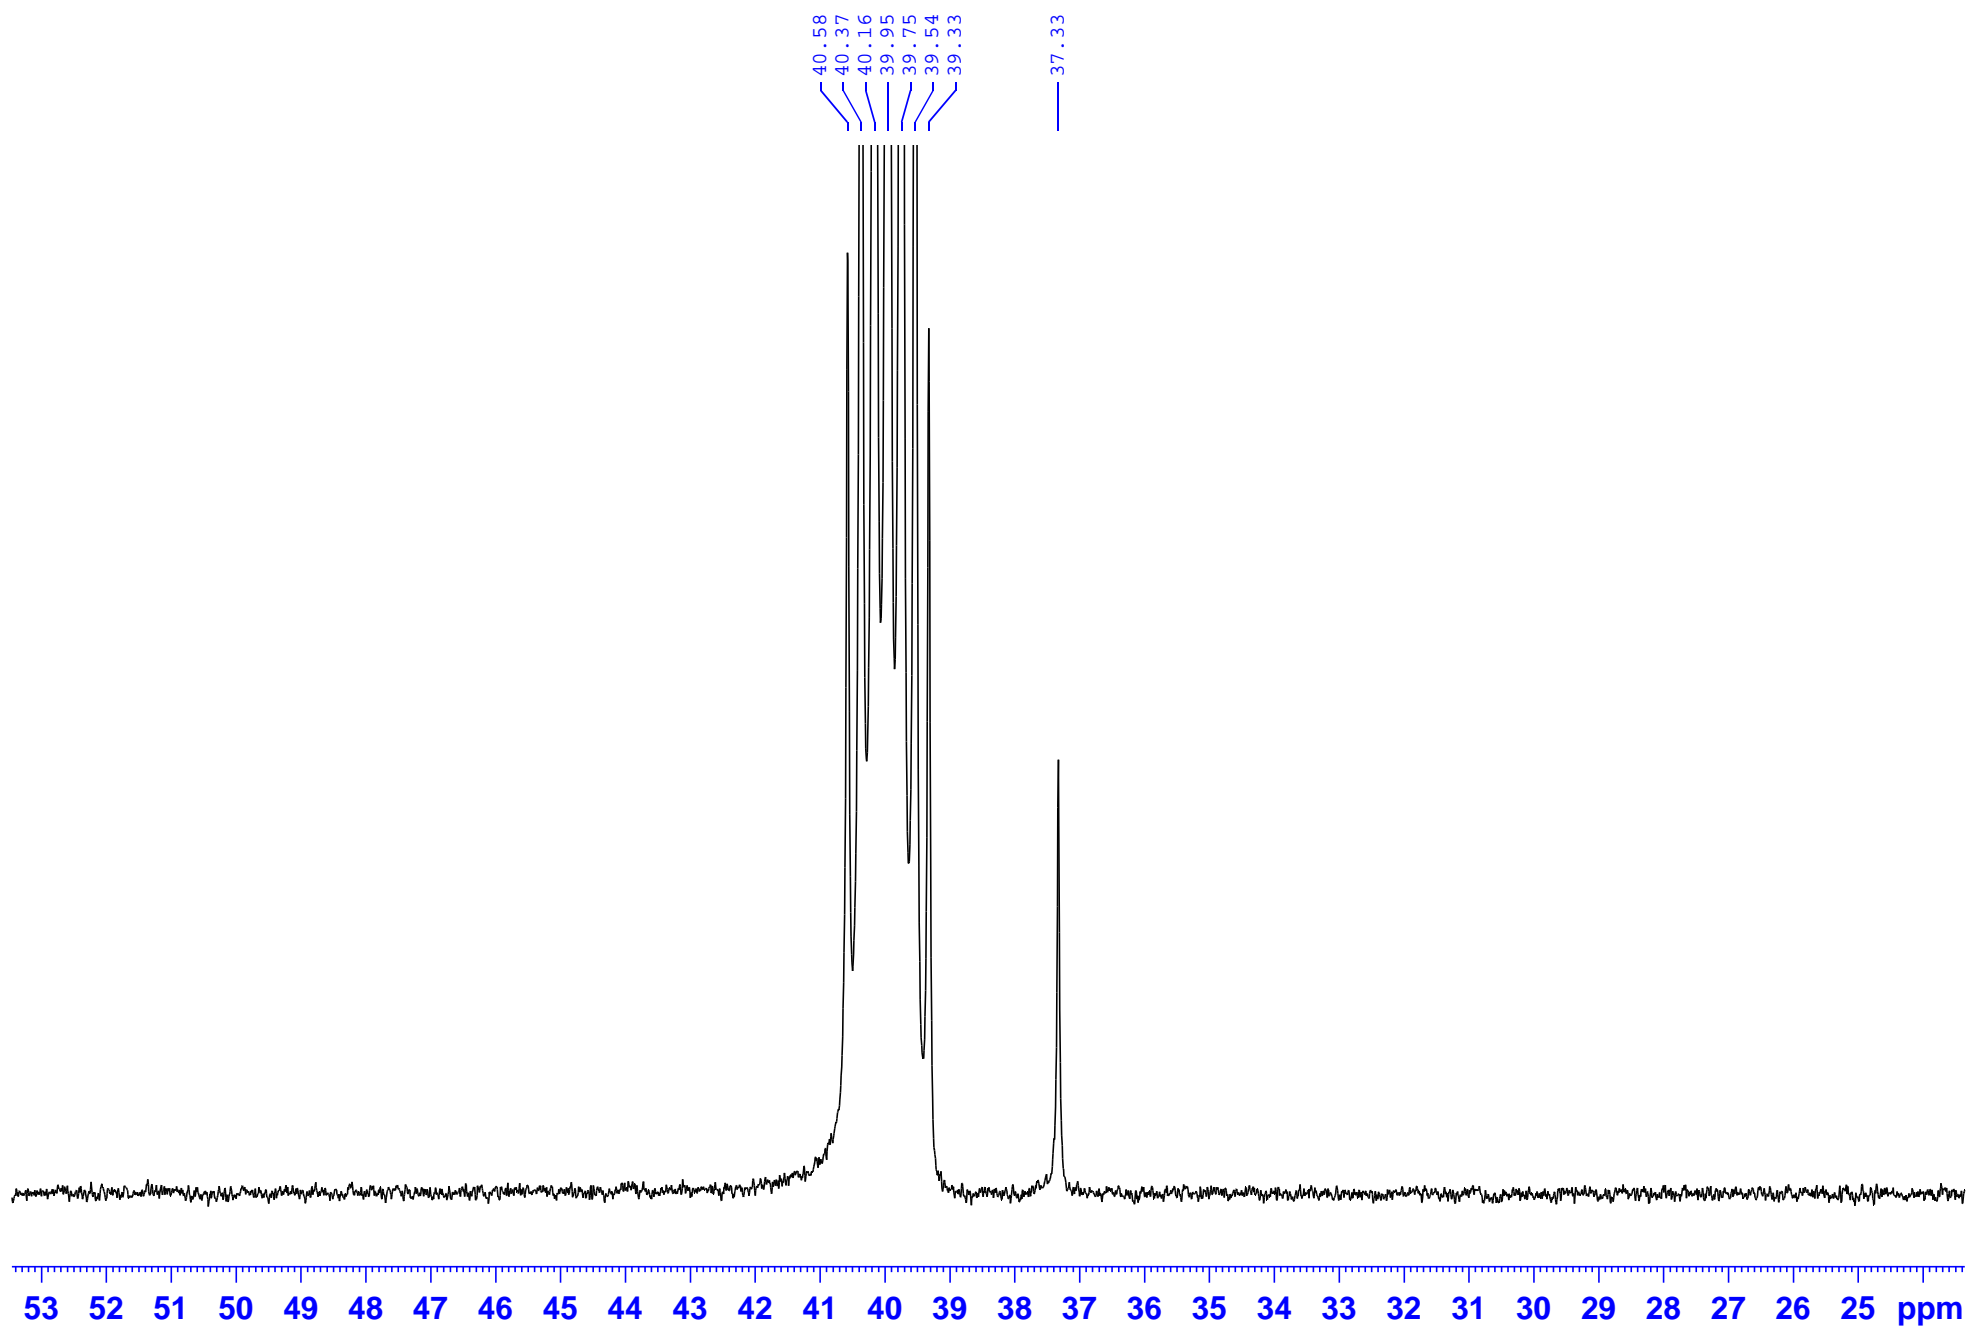

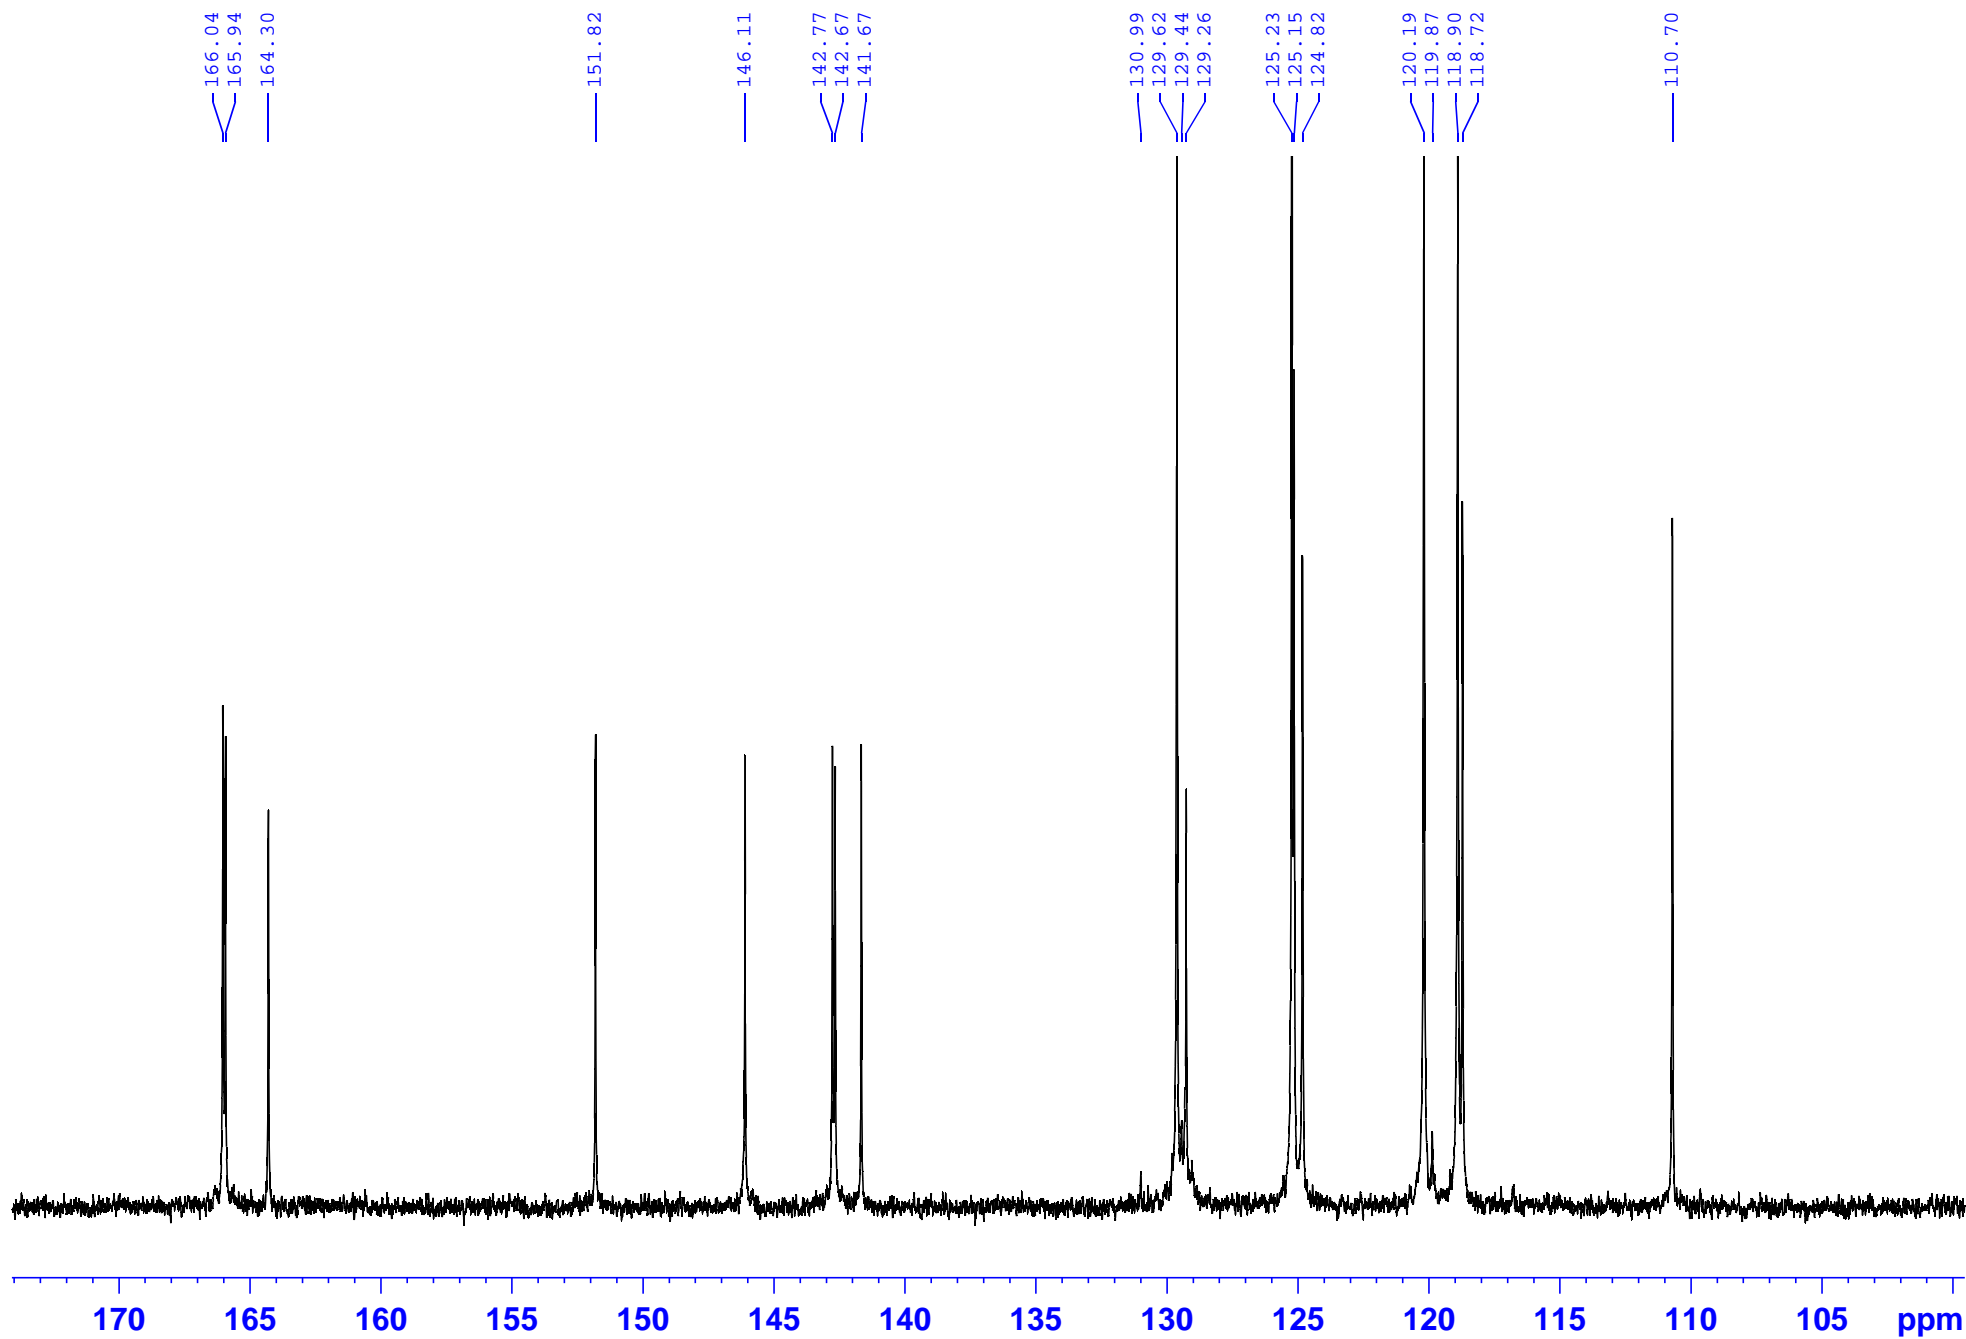

## Cairo University Micro Analytical Center

### DI Analysis Shimadzu Qp-2010 Plus

Sample Information  
 Analyzed by : Dr. Mai Younis  
 Analyzed : 01/01/2007 09:28:43  
 Sample Name : 8  
 Sample ID :  
 Customer Name : Dr. Radwan Saeed - Pharmacy - Helwan  
 Data File : C:\GCMSsolution\Data\Project1\8.QGD  
 Org Data File : C:\GCMSsolution\Data\Project1\8.QGD  
 Method File : C:\GCMSsolution\Data\Project1\High Temperature Op  
 Org Method File : C:\GCMSsolution\Data\Project1\High Temperature Op  
 Report File :  
 Tuning File : C:\GCMSsolution\System\Tune1\\_default.qgt  
 \$EndIf\$Modified by : Dr. Mai Younis  
 Modified : 01/01/2007 09:37:14

Method  
 Analytical Line 1  
 IonSourceTemp : 250.00 °C  
 [MS Table]  
 --Group 1 - Event 1--  
 Start Time : 0.00min  
 End Time : 10.00min  
 ACQ Mode : Scan  
 Event Time : 0.50sec  
 Scan Speed : 1250  
 Start m/z : 50.00  
 End m/z : 600.00

Electron Voltage : 70 eV  
 Ionization Mode : EI

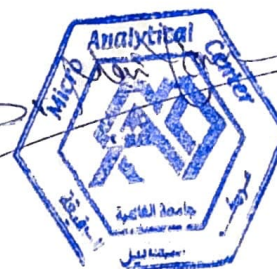

C:\GCMSsolution\Data\Project1\8.QGD

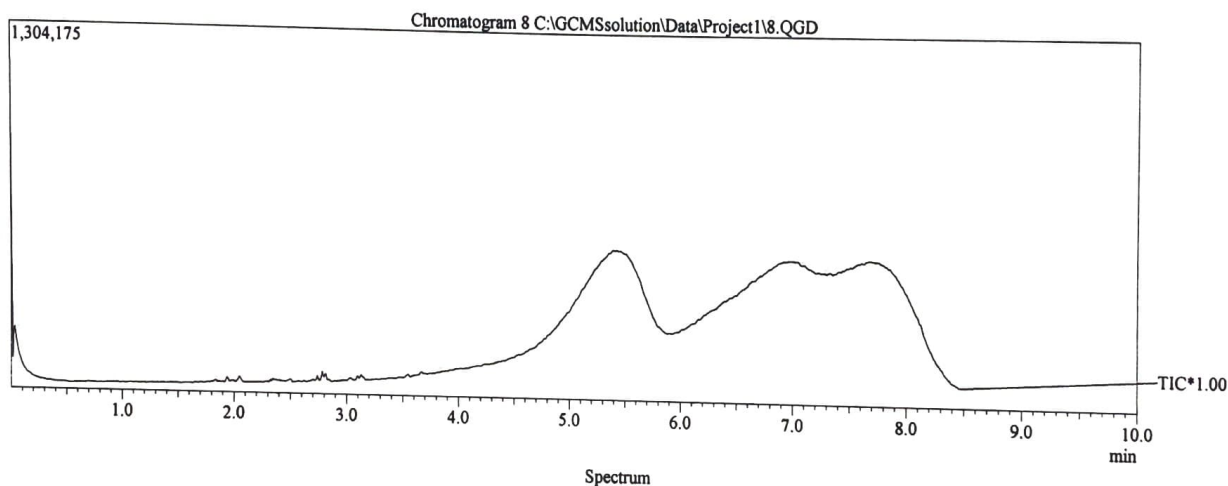

Line#:1 R.Time:5.5(Scan#:659)  
 MassPeaks:166  
 RawMode:Single 5.5(659) BasePeak:120(83463)  
 BG Mode:None Group 1 - Event 1

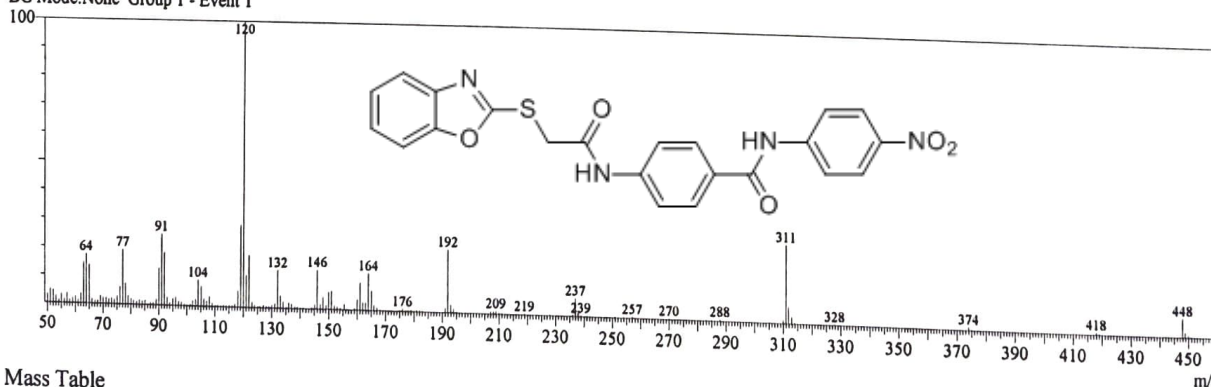

#### Mass Table

Line#:1 R.Time:5.5(Scan#:659)

MassPeaks:166

RawMode:Single 5.5(659) BasePeak:120(83463)

BG Mode:None Group 1 - Event 1

| # | m/z   | Abs. In | Rel. Int. | # | m/z   | Abs. In | Rel. Int. | # | m/z   | Abs. In | Rel. Int. |
|---|-------|---------|-----------|---|-------|---------|-----------|---|-------|---------|-----------|
| 1 | 50.00 | 2596    | 3.11      | 4 | 53.00 | 2132    | 2.55      | 7 | 56.05 | 1223    | 1.47      |
| 2 | 51.00 | 4137    | 4.96      | 5 | 54.05 | 918     | 1.10      | 8 | 57.00 | 2983    | 3.57      |
| 3 | 52.00 | 3753    | 4.50      | 6 | 55.00 | 2729    | 3.27      | 9 | 58.00 | 990     | 1.19      |

# IR of compound 8e

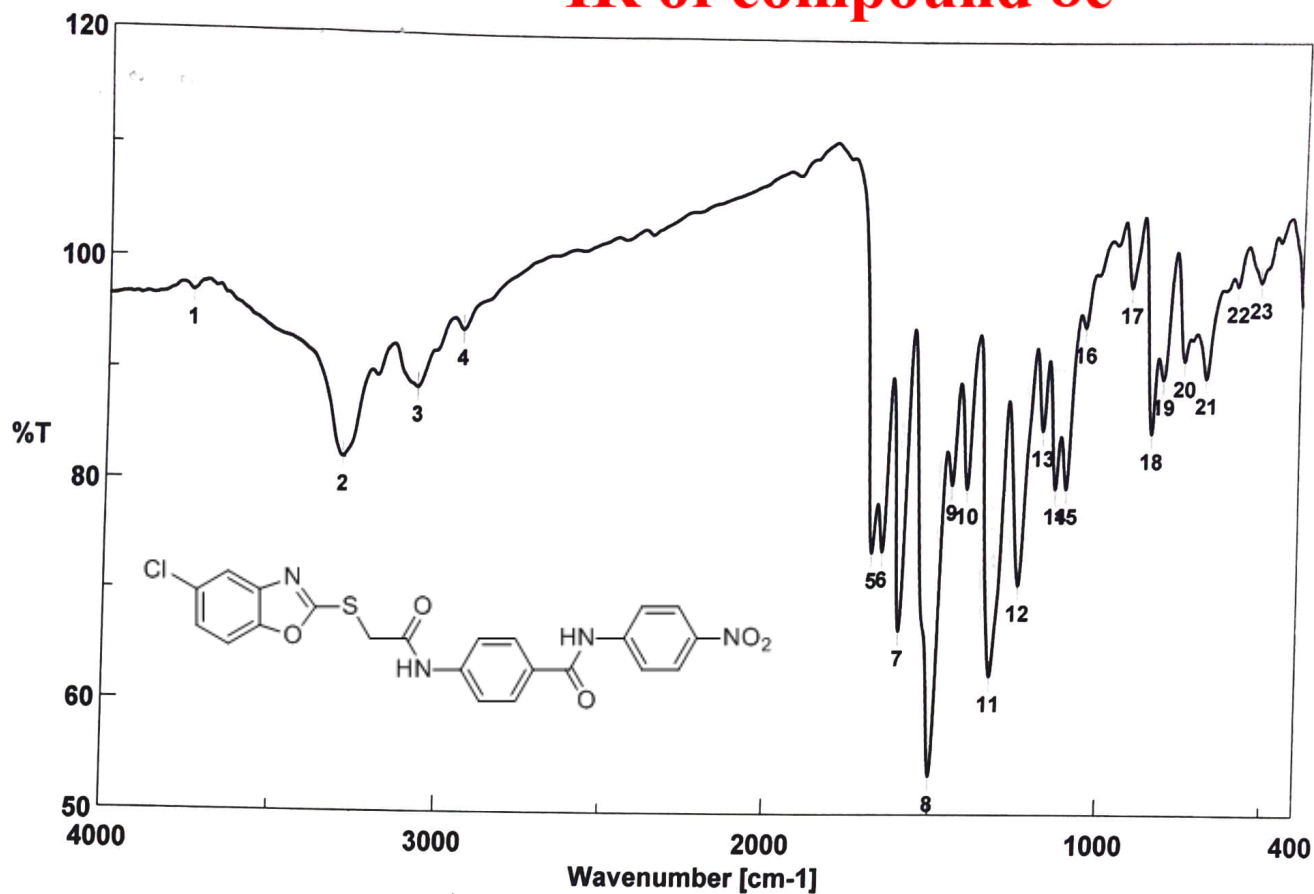

Accumulation 16  
 Resolution 4 cm-1  
 Zero Filling ON  
 Apodization Cosine  
 Gain Auto (2)  
 Scanning Speed Auto (2 mm/sec)  
 Date/Time 8/22/2021 1:58PM  
 Update 8/22/2021 1:59PM  
 Operator IR  
 File Name Memory#112  
 Sample Name CBA -9  
 Comment

| No. | cm-1    | %T      | No. | cm-1    | %T      | No. | cm-1    | %T      |
|-----|---------|---------|-----|---------|---------|-----|---------|---------|
| 1   | 3747.01 | 96.8943 | 2   | 3290.93 | 82.0084 | 3   | 3070.12 | 88.3005 |
| 4   | 2936.09 | 93.505  | 5   | 1687.41 | 73.7136 | 6   | 1655.59 | 73.8475 |
| 7   | 1602.56 | 66.6887 | 8   | 1501.31 | 53.5204 | 9   | 1450.21 | 79.943  |
| 10  | 1404.89 | 79.6091 | 11  | 1326.79 | 62.5326 | 12  | 1247.72 | 70.8074 |
| 13  | 1179.26 | 84.9045 | 14  | 1139.72 | 79.6537 | 15  | 1107.9  | 79.6399 |
| 16  | 1054.87 | 94.393  | 17  | 916.986 | 98.054  | 18  | 850.454 | 84.7524 |
| 19  | 815.742 | 89.7467 | 20  | 752.102 | 91.4355 | 21  | 684.606 | 89.8845 |
| 22  | 594.932 | 98.2421 | 23  | 524.543 | 98.62   |     |         |         |

فاحه  
 هادي

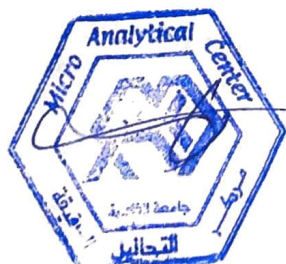



# <sup>1</sup>H NMR of compound 8e

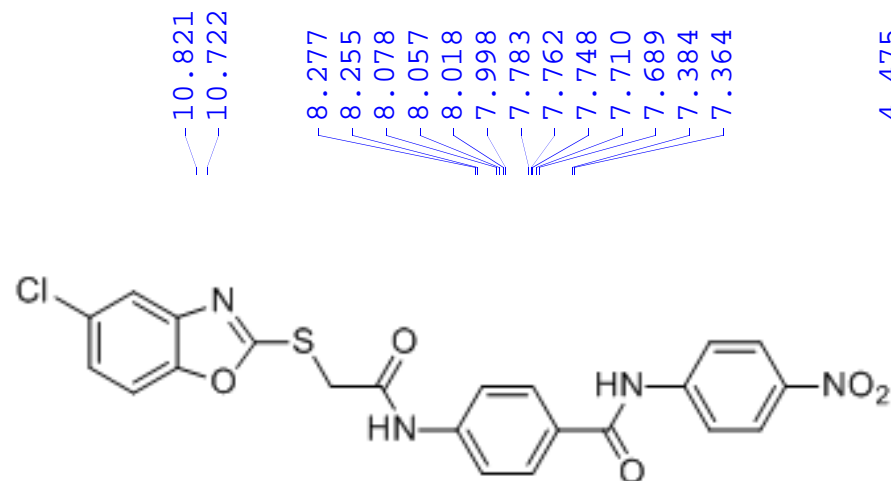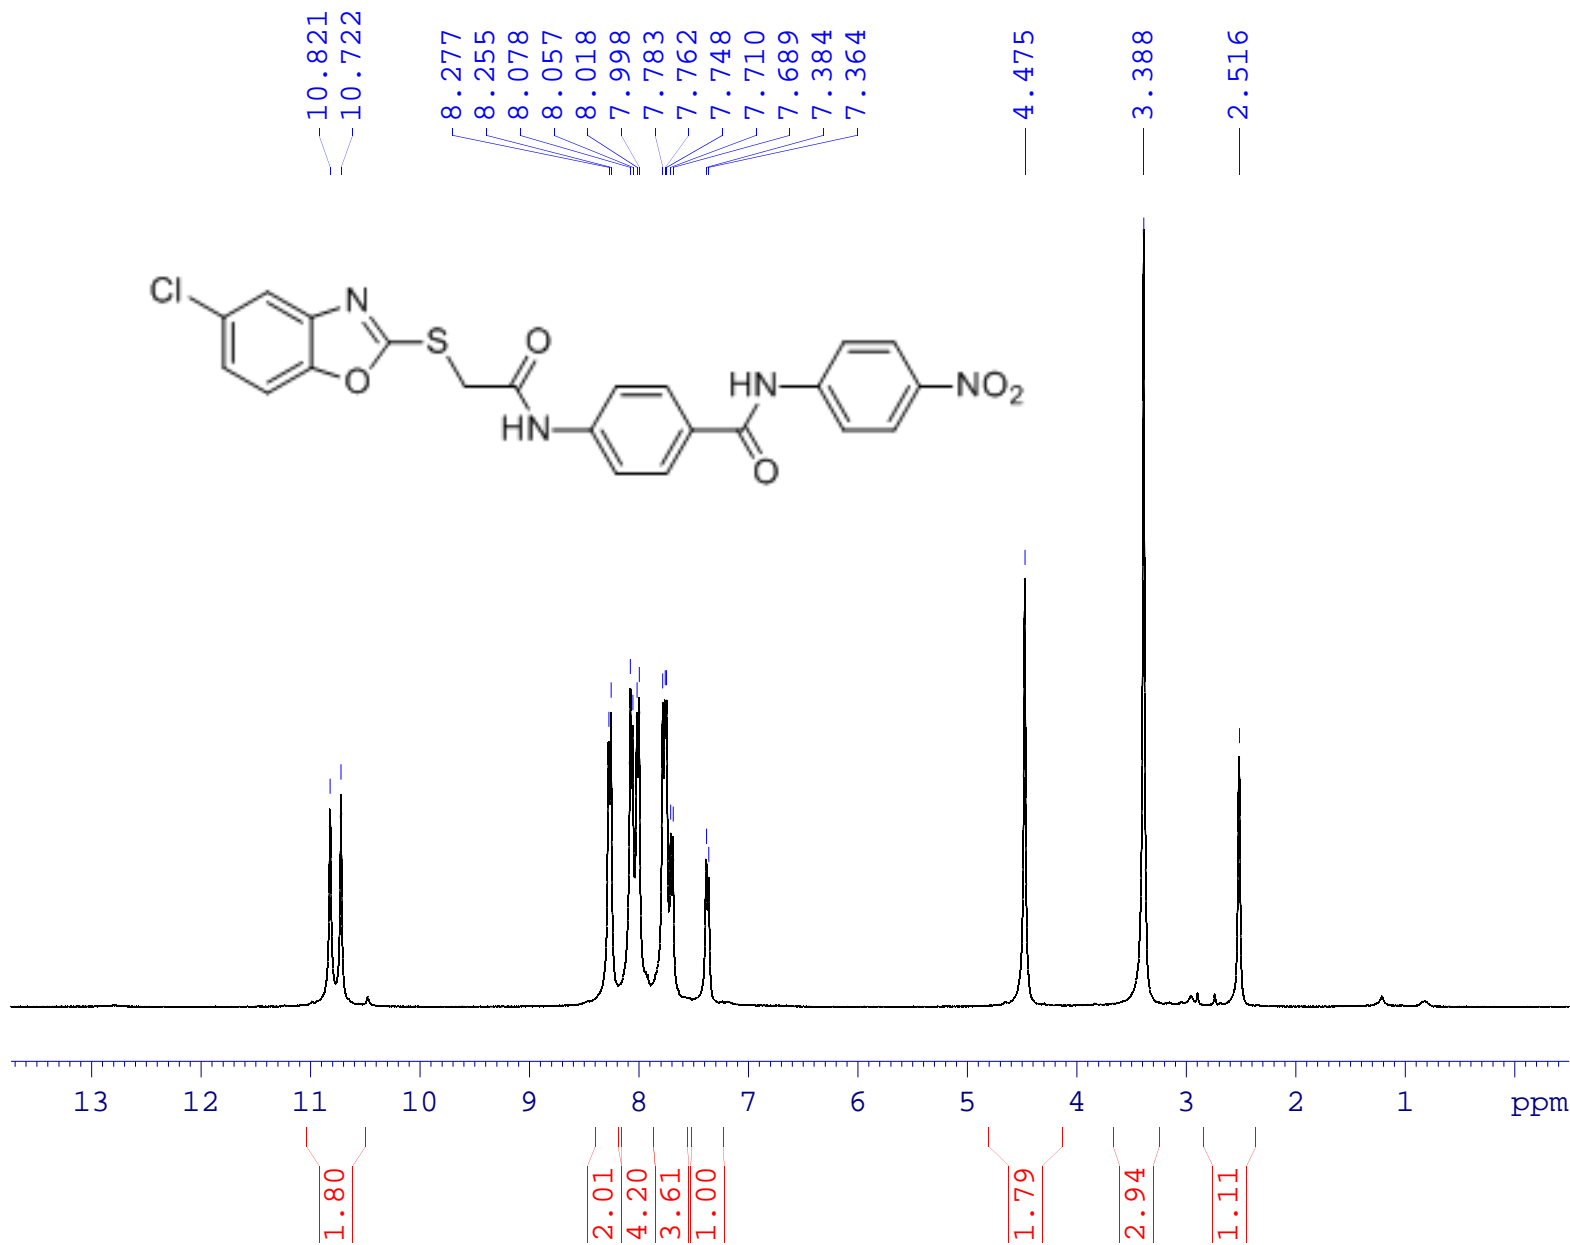

Current Data Parameters  
NAME Ebrahim Eissa- CBA 9x-proton-DMSO-D  
EXPNO 10  
PROCNO 1

F2 - Acquisition Parameters  
Date\_ 20220111  
Time 17.27 h  
INSTRUM spect  
PROBHD Z108618\_0945 (  
PULPROG zg30  
TD 65536  
SOLVENT DMSO  
NS 16  
DS 2  
SWH 8012.820 Hz  
FIDRES 0.244532 Hz  
AQ 4.0894465 sec  
RG 120.93  
DW 62.400 usec  
DE 6.50 usec  
TE 0 K  
D1 1.00000000 sec  
TD0 1  
SF01 400.2024712 MHz  
NUC1 1H  
P1 13.50 usec  
PLW1 13.00000000 W

F2 - Processing parameters  
SI 65536  
SF 400.2000000 MHz  
WDW EM  
SSB 0  
LB 0.30 Hz  
GB 0  
PC 1.00

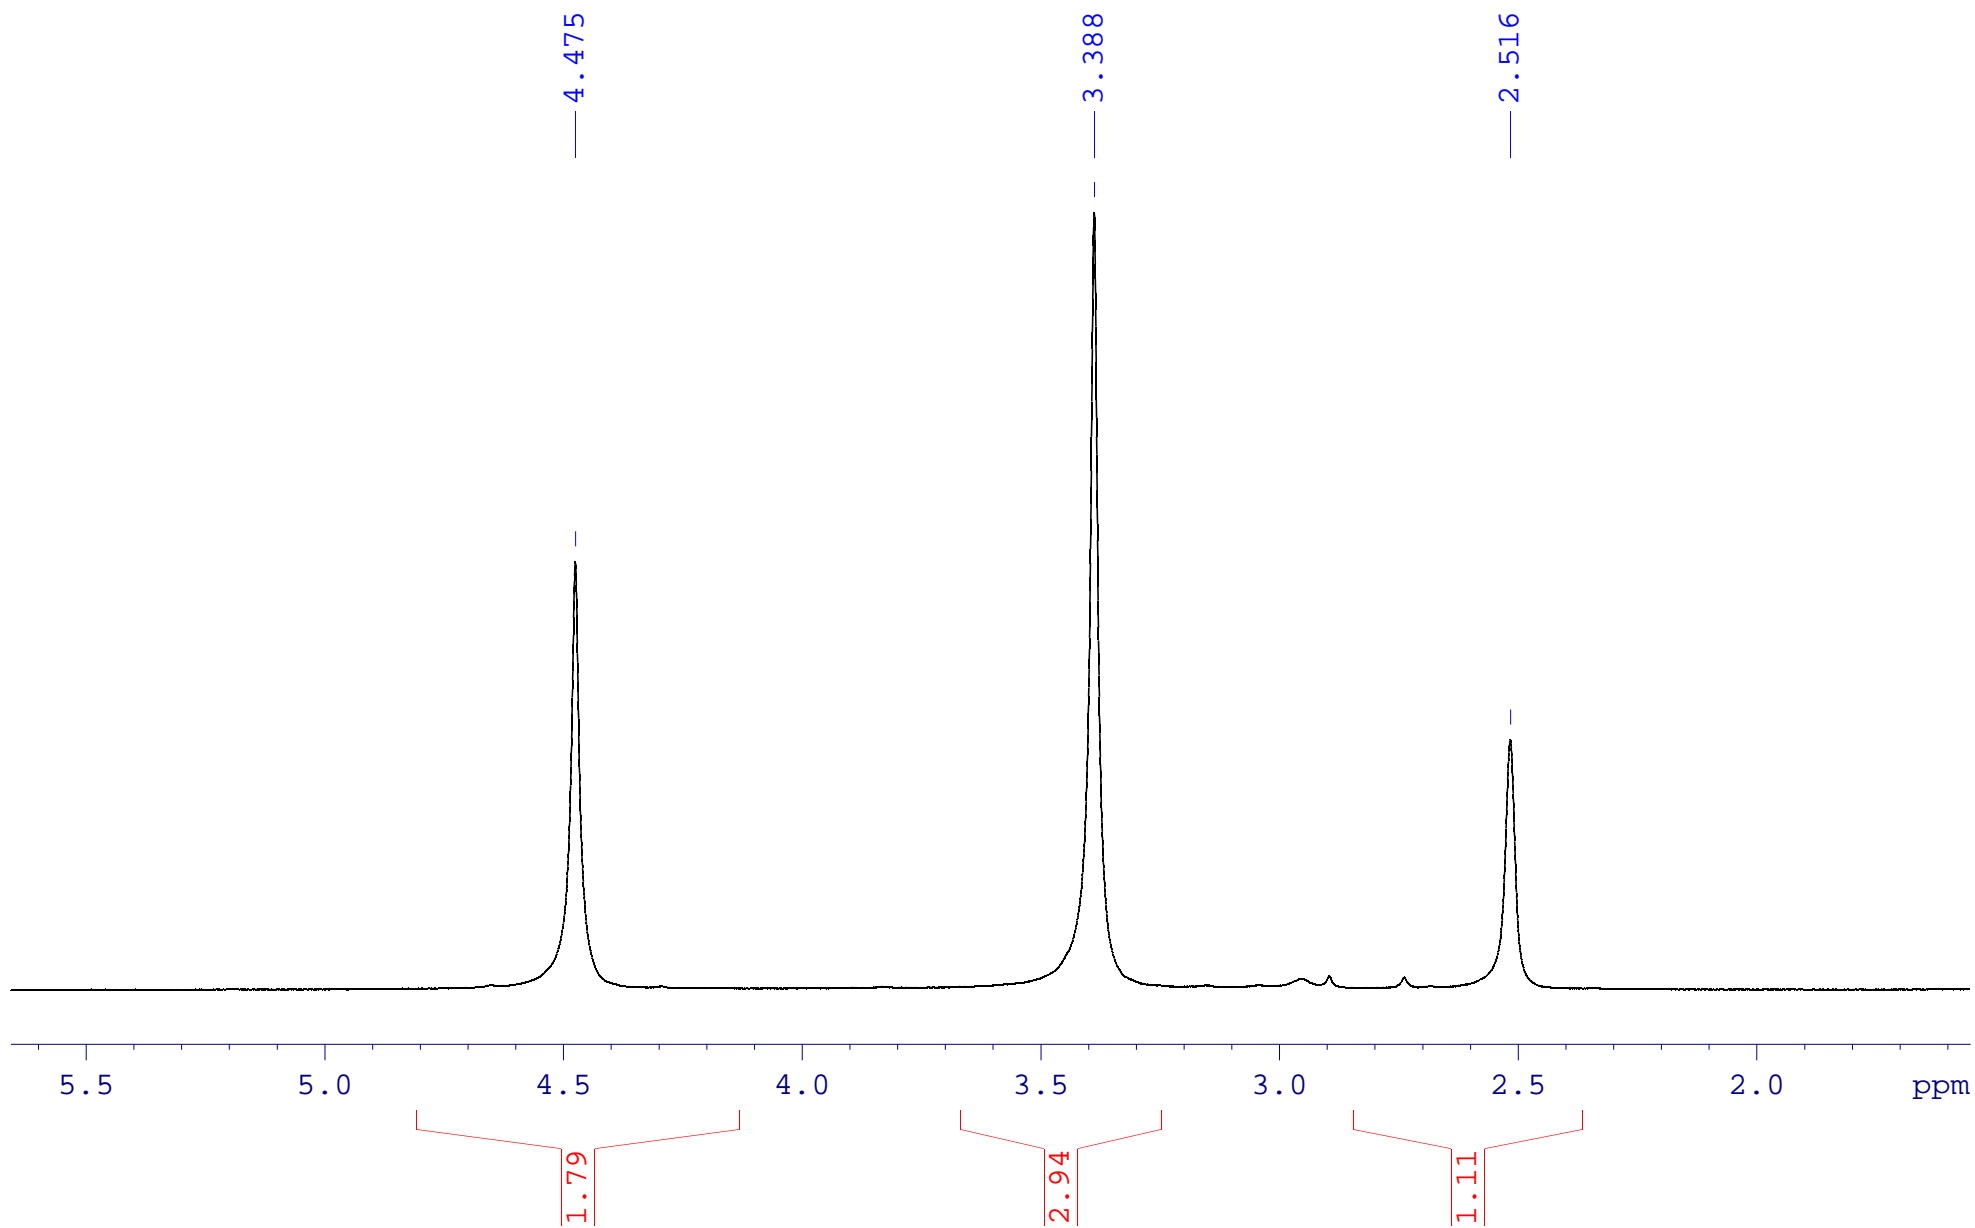

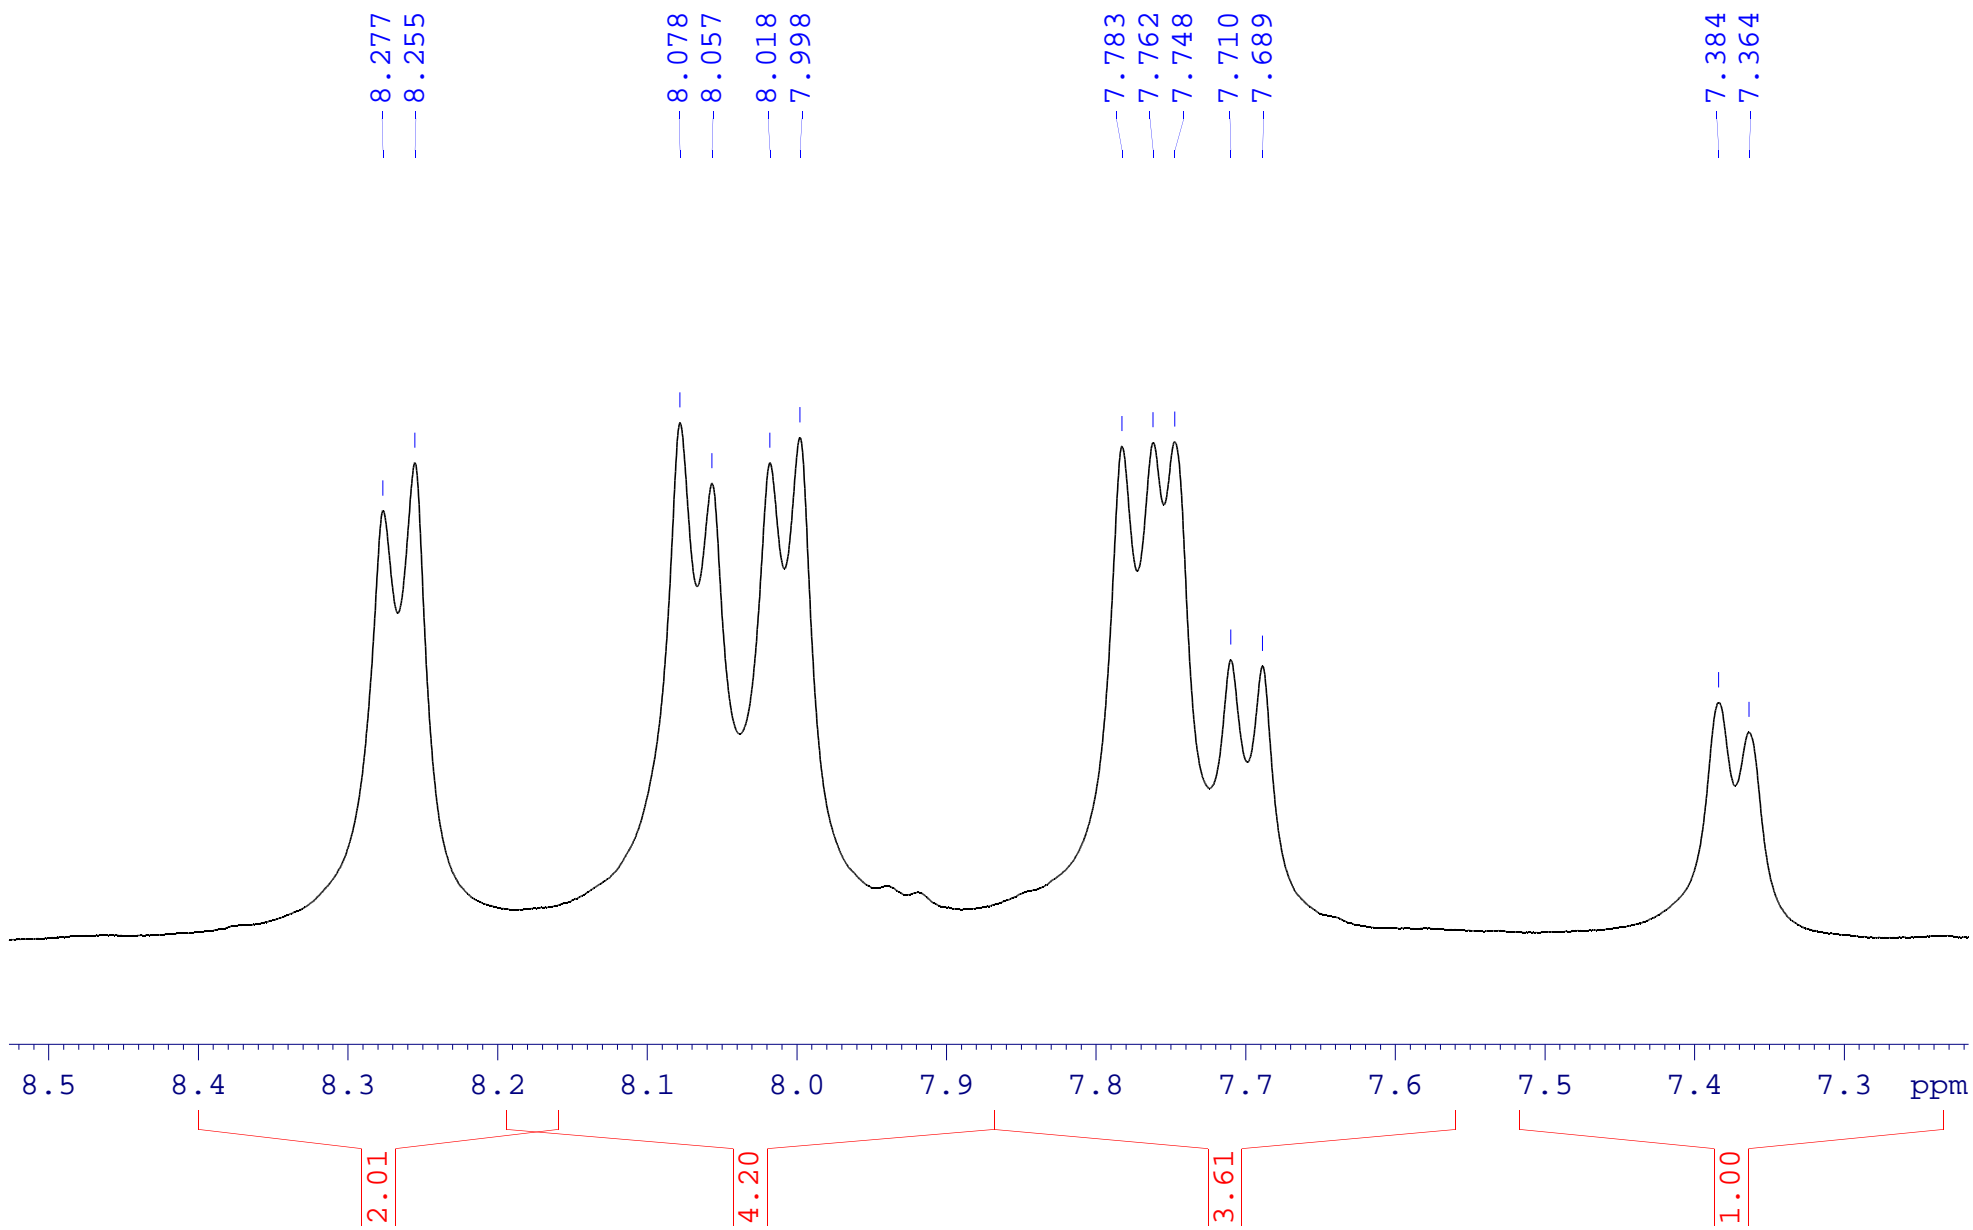

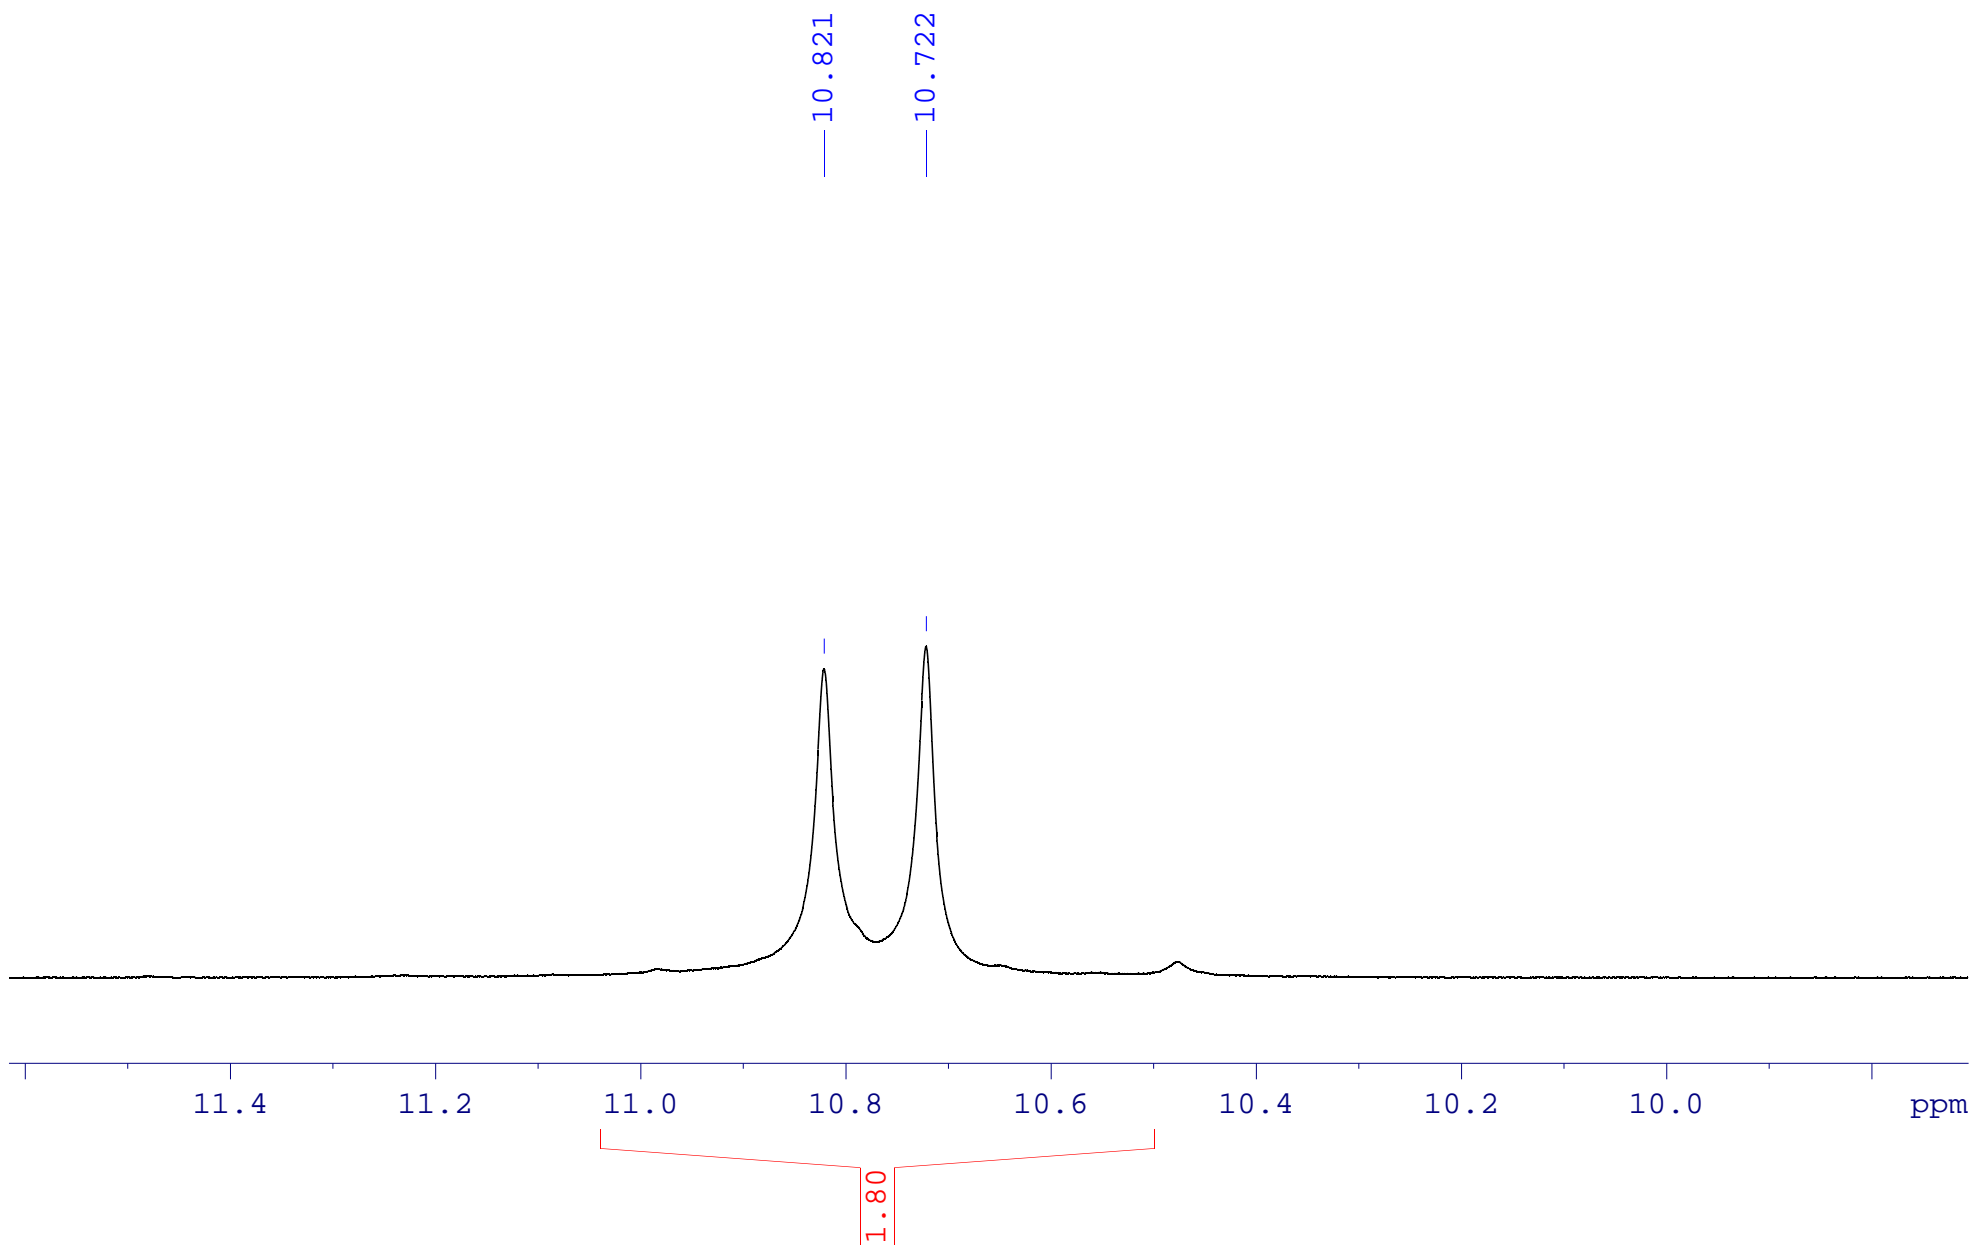

# <sup>13</sup>C NMR of compound 8e

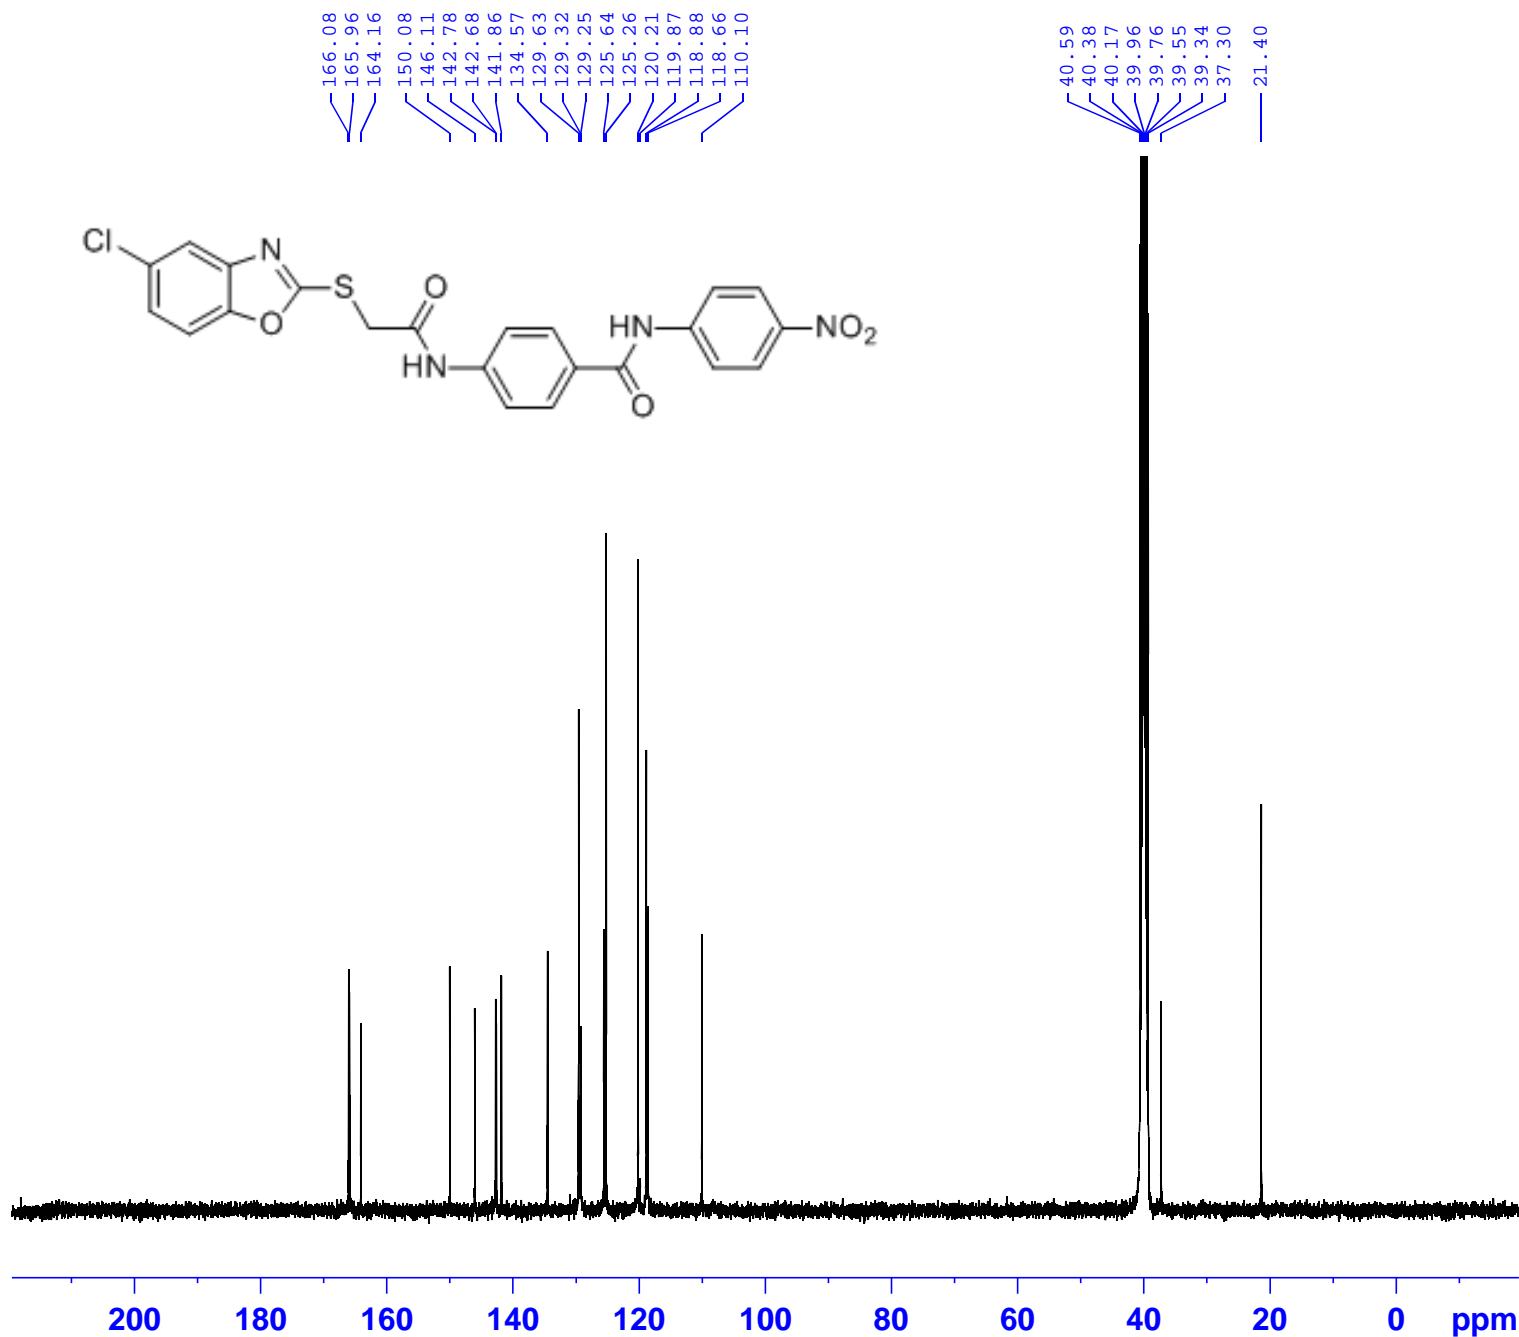

Current Data Parameters  
 NAME ebrahim essa -CBA9-RR-c13  
 EXPNO 11  
 PROCNO 1

F2 - Acquisition Parameters  
 Date\_ 20220110  
 Time 21.52 h  
 INSTRUM spect  
 PROBHD Z108618\_0945 (   
 PULPROG zgpg30  
 TD 65536  
 SOLVENT DMSO  
 NS 2200  
 DS 4  
 SWH 24038.461 Hz  
 FIDRES 0.733596 Hz  
 AQ 1.3631488 sec  
 RG 197.77  
 DW 20.800 usec  
 DE 6.50 usec  
 TE 296.2 K  
 D1 2.00000000 sec  
 D11 0.03000000 sec  
 TD0 1  
 SFO1 100.6404331 MHz  
 NUC1 13C  
 P1 10.00 usec  
 PLW1 47.00000000 W  
 SFO2 400.2016008 MHz  
 NUC2 1H  
 CPDPRG[2] waltz16  
 PCPD2 90.00 usec  
 PLW2 13.00000000 W  
 PLW12 0.29249999 W  
 PLW13 0.14713000 W

F2 - Processing parameters  
 SI 32768  
 SF 100.6303700 MHz  
 WDW EM  
 SSB 0  
 LB 1.00 Hz  
 GB 0  
 PC 1.40

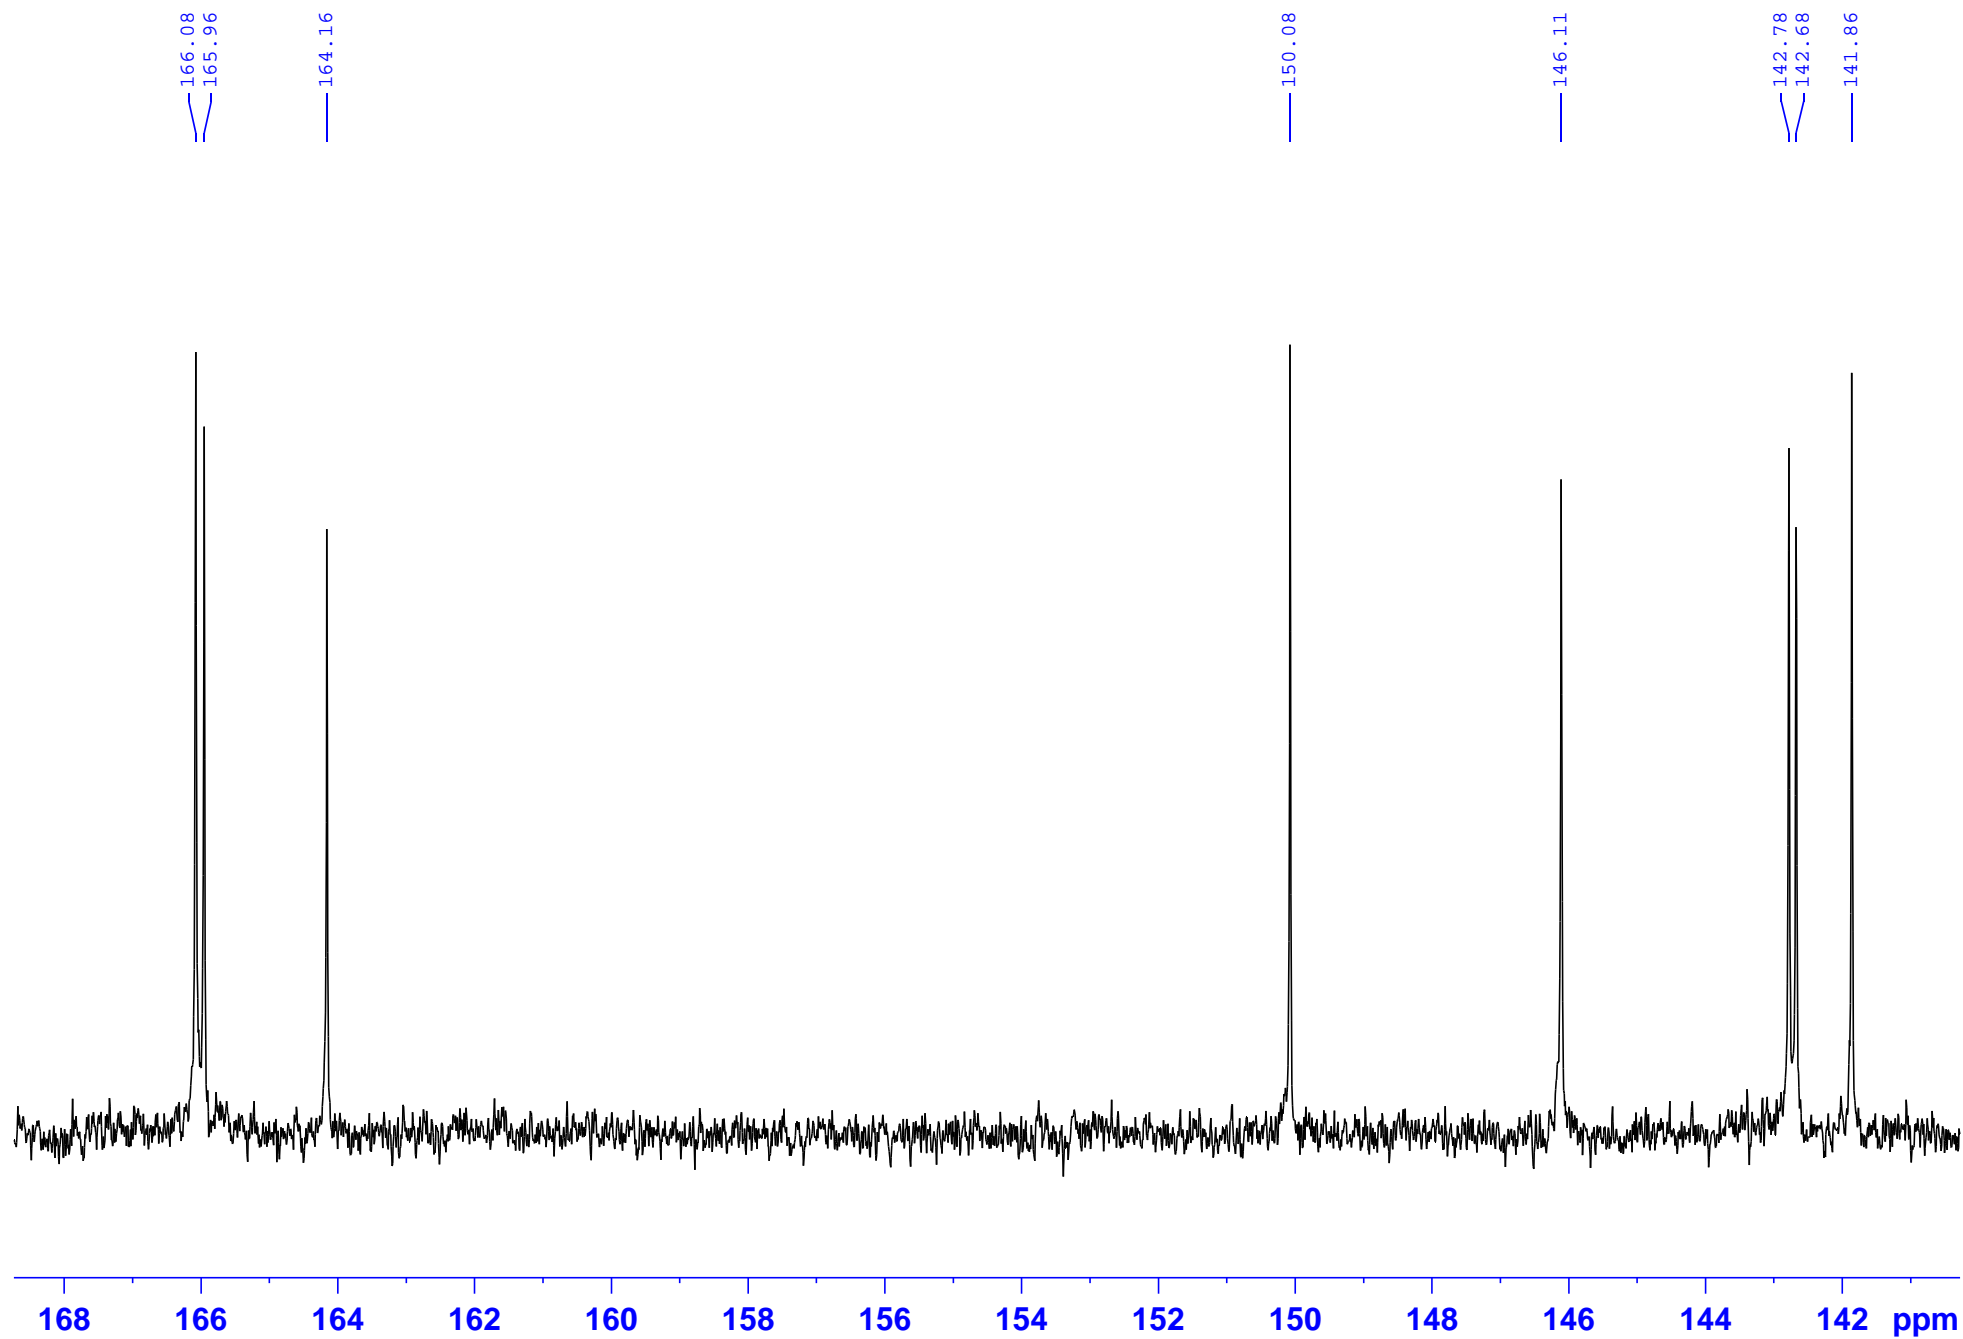

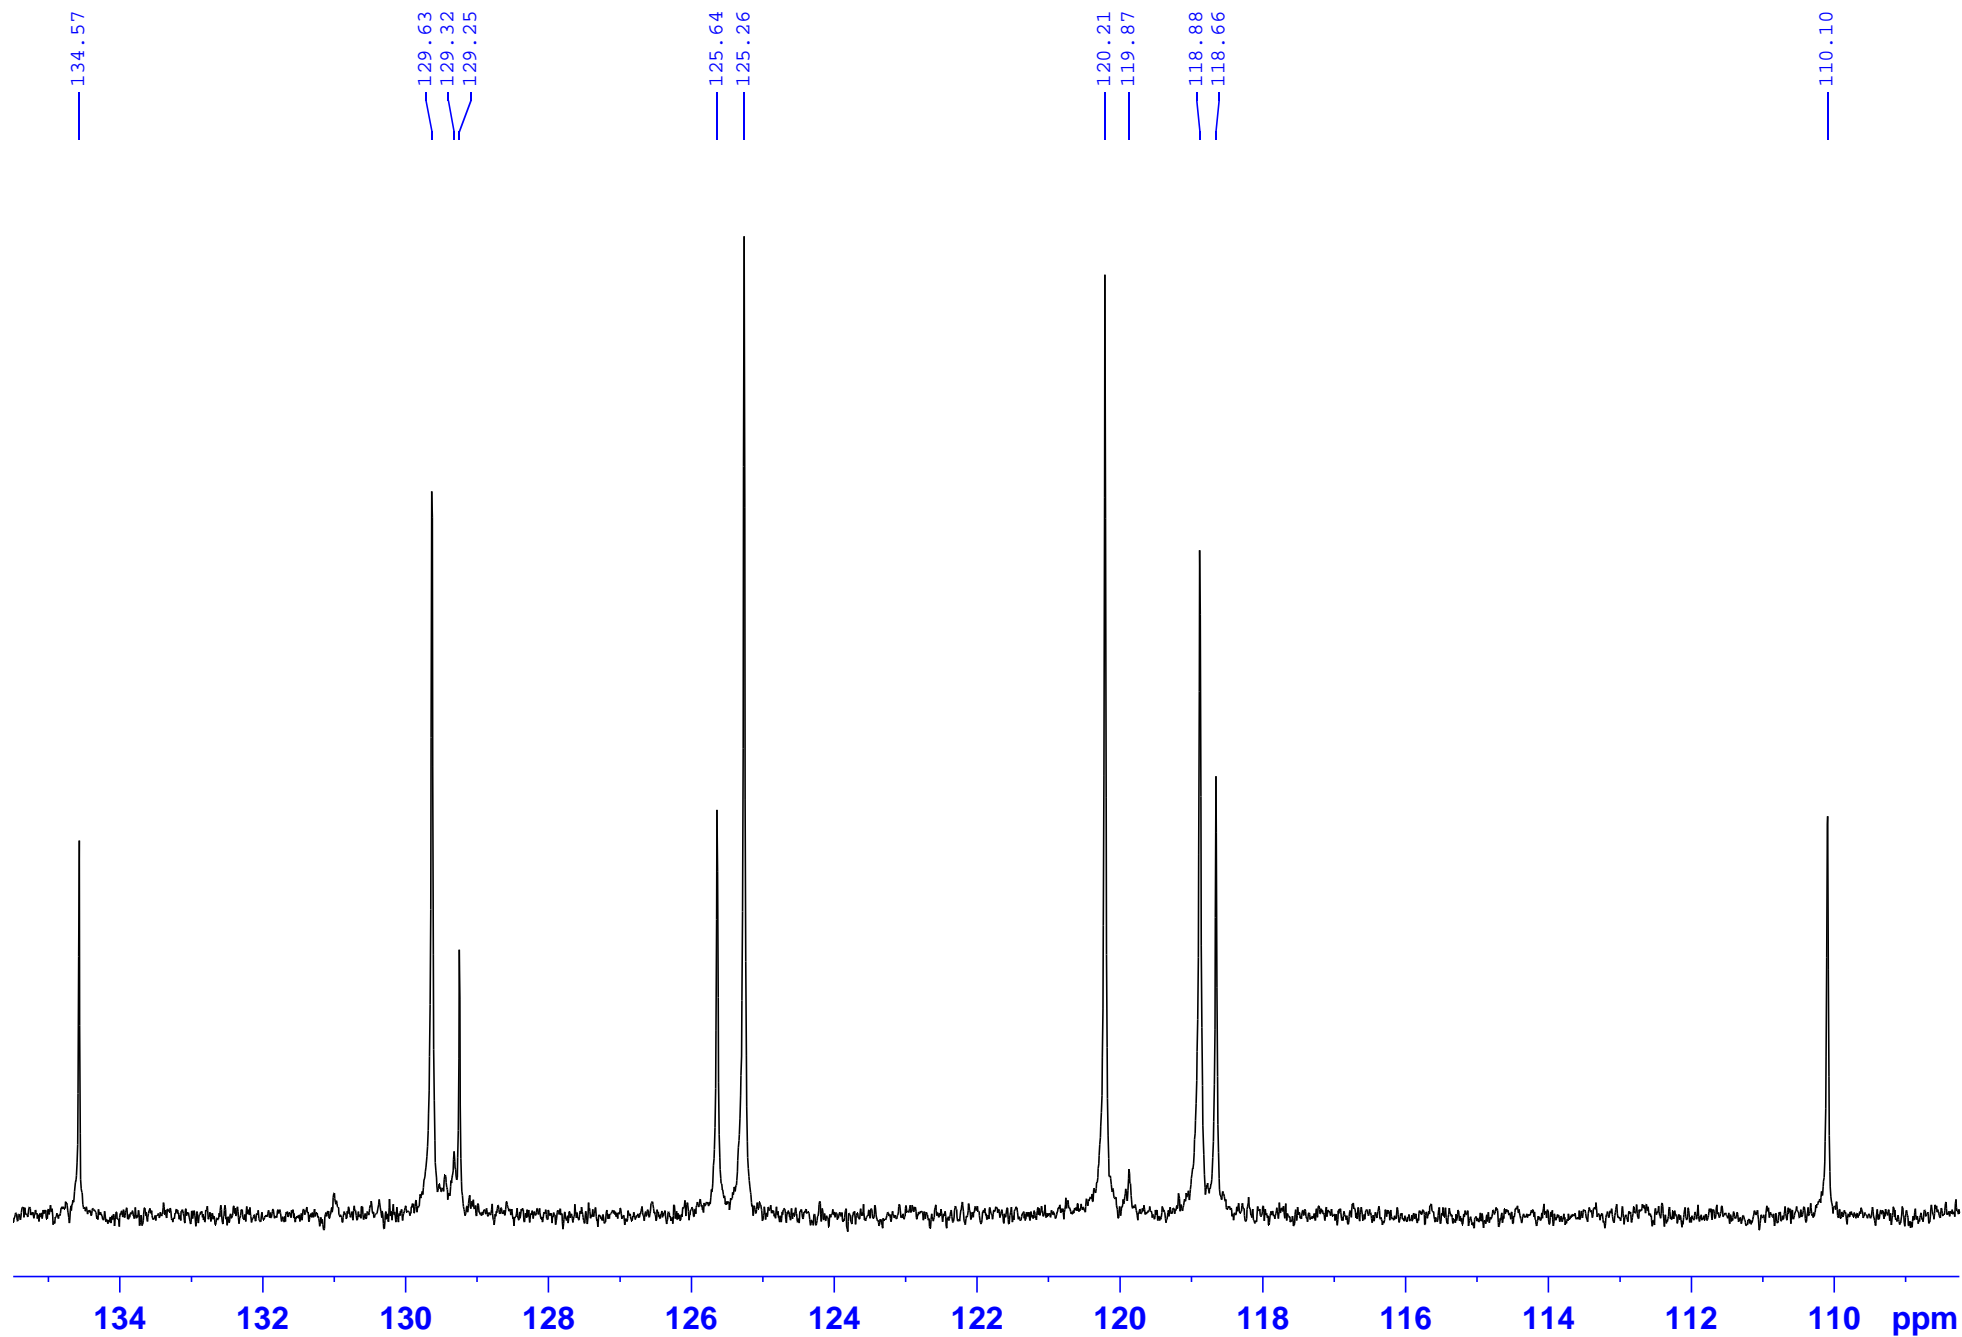

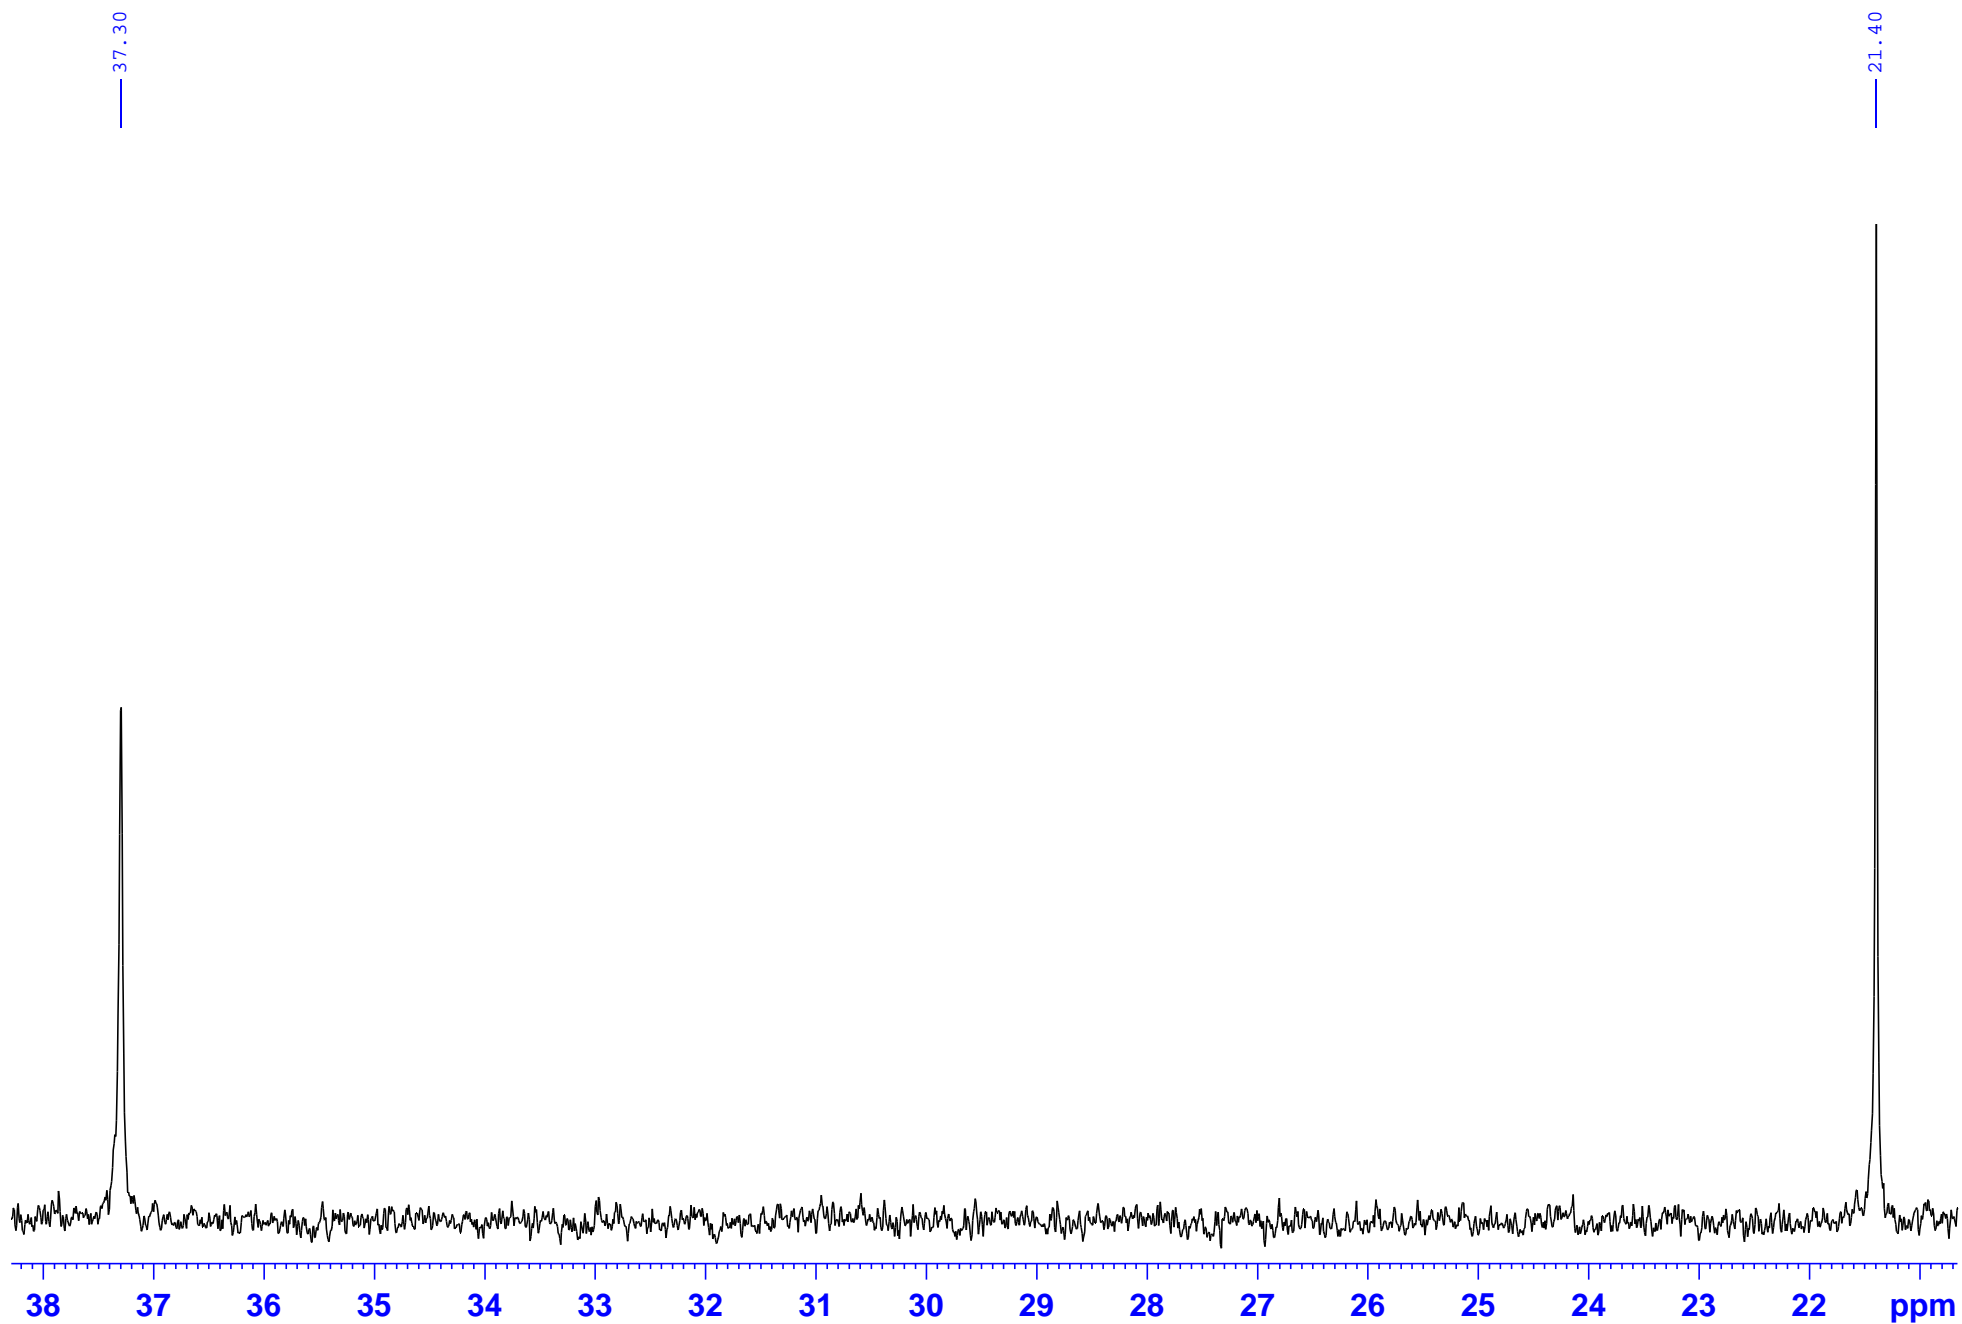



## Cairo University Micro Analytical Center

### DI Analysis Shimadzu Qp-2010 Plus

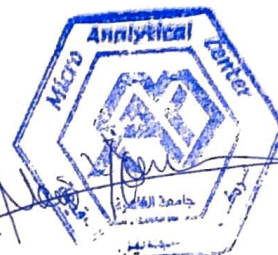

#### Sample Information

Analyzed by : Dr. Mai Younis  
 Analyzed : 01/01/2007 09:39:36  
 Sample Name : 9  
 Sample ID :  
 Customer Name : Dr. Radwan Saeed - Pharmacy - Helwan  
 Data File : C:\GCMSsolution\Data\Project1\9.QGD  
 Org Data File : C:\GCMSsolution\Data\Project1\9.QGD  
 Method File : C:\GCMSsolution\Data\Project1\High Temperature Op  
 Org Method File : C:\GCMSsolution\Data\Project1\High Temperature Op  
 Report File :  
 Tuning File : C:\GCMSsolution\System\Tune1\\_default.qgt  
 \$EndIf\$Modified by : Dr. Mai Younis  
 Modified : 01/01/2007 09:45:36

#### Method

==== Analytical Line 1 ====  
 IonSourceTemp : 250.00 °C  
 [MS Table]  
 --Group 1 - Event 1--  
 Start Time : 0.00min  
 End Time : 10.00min  
 ACQ Mode : Scan  
 Event Time : 0.50sec  
 Scan Speed : 1250  
 Start m/z : 50.00  
 End m/z : 600.00

Electron Voltage : 70 eV  
 Ionization Mode : EI

C:\GCMSsolution\Data\Project1\9.QGD

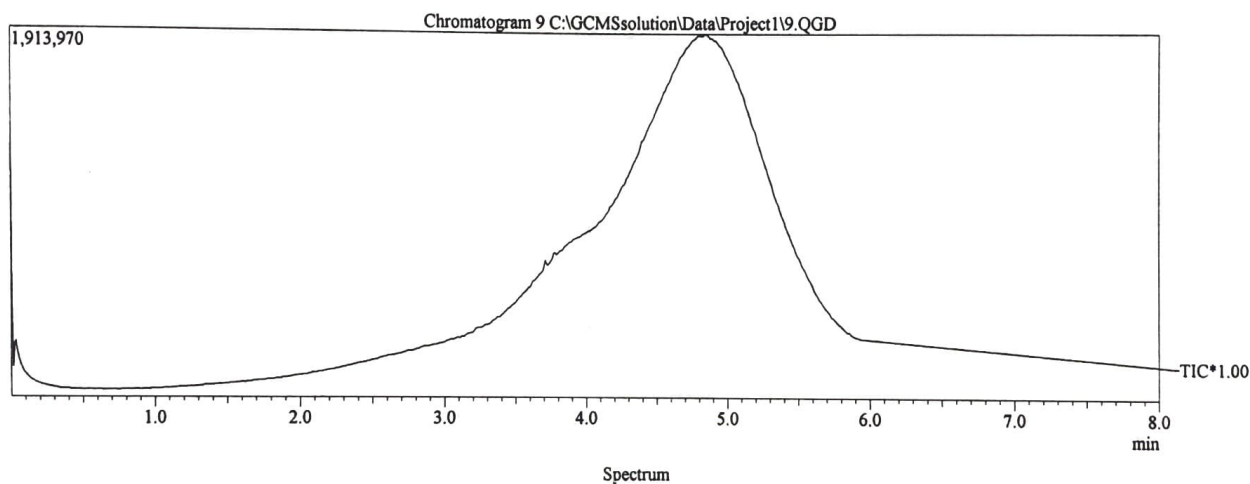

Line#:1 R.Time:4.9(Scan#:583)

MassPeaks:273

RawMode:Single 4.9(583) BasePeak:120(270494)

BG Mode:None Group 1 - Event 1

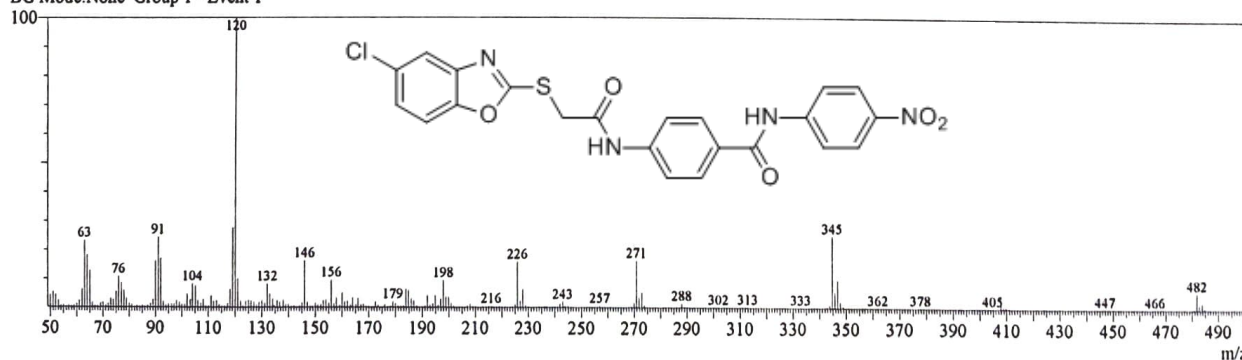

#### Mass Table

Line#:1 R.Time:4.9(Scan#:583)

MassPeaks:273

RawMode:Single 4.9(583) BasePeak:120(270494)

BG Mode:None Group 1 - Event 1

| # | m/z   | Abs. In | Rel. Int. | # | m/z   | Abs. In | Rel. Int. | # | m/z   | Abs. In | Rel. Int. |
|---|-------|---------|-----------|---|-------|---------|-----------|---|-------|---------|-----------|
| 1 | 50.00 | 11770   | 4.35      | 4 | 53.00 | 6228    | 2.30      | 7 | 56.05 | 1058    | 0.39      |
| 2 | 51.00 | 14497   | 5.36      | 5 | 54.00 | 1777    | 0.66      | 8 | 57.00 | 2110    | 0.78      |
| 3 | 52.00 | 11916   | 4.41      | 6 | 55.00 | 2383    | 0.88      | 9 | 57.95 | 1854    | 0.69      |

# IR of compound 8f

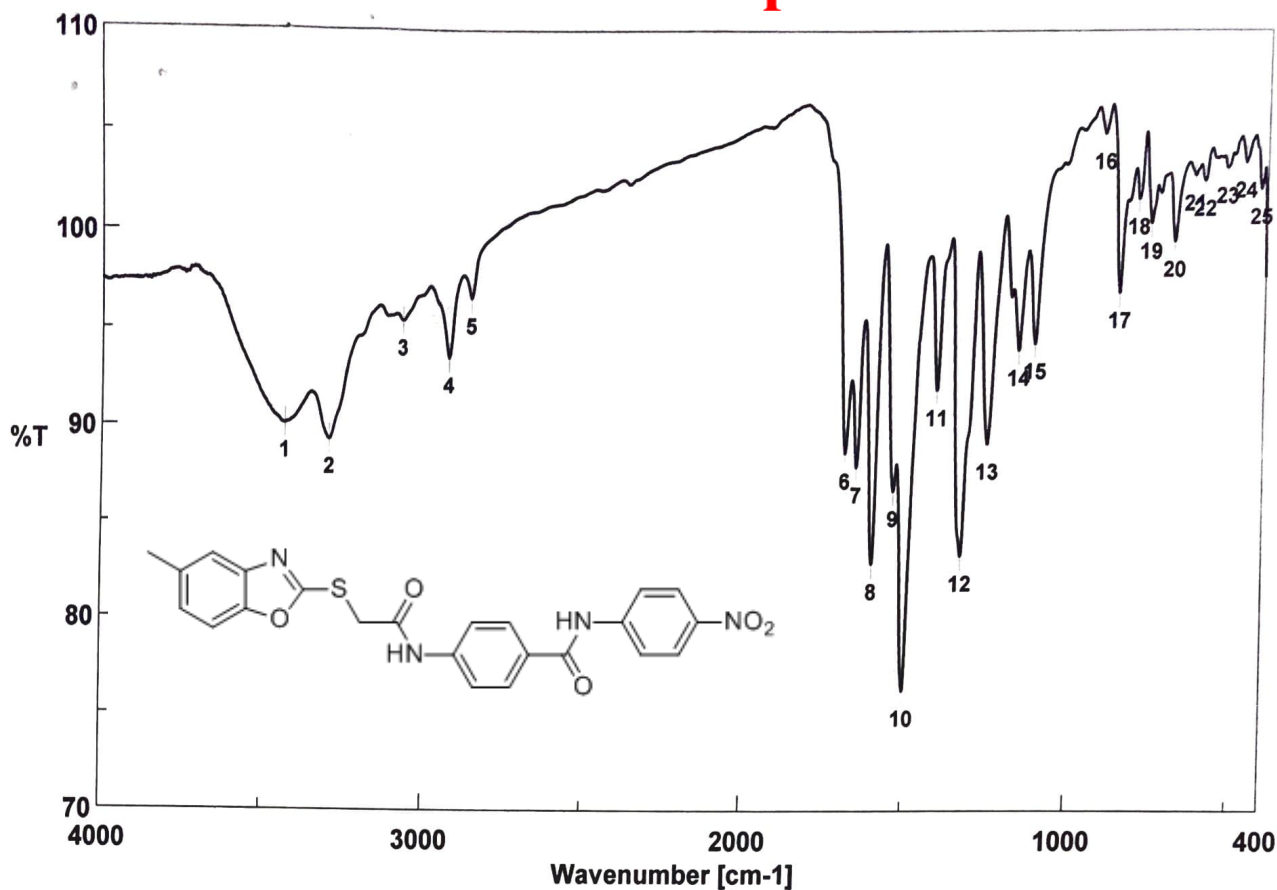

Accumulation 16  
Resolution 4 cm<sup>-1</sup>  
Zero Filling ON  
Apodization Cosine  
Gain Auto (2)  
Scanning Speed Auto (2 mm/sec)  
Date/Time 8/22/2021 1:53PM  
Update 8/22/2021 1:53PM  
Operator IR  
File Name Memory#94  
Sample Name MBA -9  
Comment

| No. | cm-1    | %T      | No. | cm-1    | %T      | No. | cm-1    | %T      |
|-----|---------|---------|-----|---------|---------|-----|---------|---------|
| 1   | 3427.85 | 90.0419 | 2   | 3290.93 | 89.2141 | 3   | 3065.3  | 95.292  |
| 4   | 2920.66 | 93.3357 | 5   | 2853.17 | 96.3965 | 6   | 1687.41 | 88.4209 |
| 7   | 1651.73 | 87.7204 | 8   | 1601.59 | 82.7477 | 9   | 1537.95 | 86.4974 |
| 10  | 1500.35 | 76.2201 | 11  | 1407.78 | 91.6717 | 12  | 1329.68 | 83.1489 |
| 13  | 1251.58 | 88.9348 | 14  | 1158.04 | 93.7334 | 15  | 1108.87 | 94.0763 |
| 16  | 902.523 | 104.848 | 17  | 849.49  | 96.7316 | 18  | 794.528 | 101.526 |
| 19  | 755.959 | 100.277 | 20  | 682.677 | 99.3516 | 21  | 623.859 | 102.726 |
| 22  | 593.968 | 102.447 | 23  | 525.507 | 103.097 | 24  | 467.653 | 103.385 |
| 25  | 420.406 | 102.044 |     |         |         |     |         |         |

فاهد  
هليلج

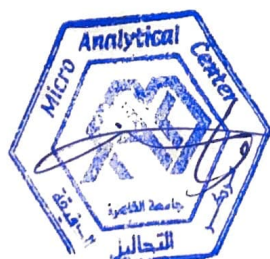

# <sup>1</sup>H NMR of compound 8f

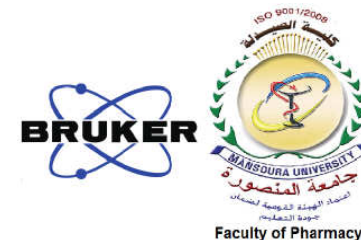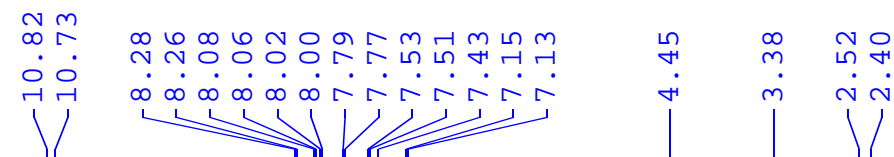

Current Data Parameters  
 NAME ebrahim essa -CBA9-RR-hnmr  
 EXPNO 11  
 PROCNO 1

F2 - Acquisition Parameters  
 Date\_ 20220110  
 Time 11.41 h  
 INSTRUM spect  
 PROBHD Z108618\_0945 (   
 PULPROG zg30  
 TD 65536  
 SOLVENT DMSO  
 NS 16  
 DS 2  
 SWH 8012.820 Hz  
 FIDRES 0.244532 Hz  
 AQ 4.0894465 sec  
 RG 112.56  
 DW 62.400 usec  
 DE 6.50 usec  
 TE 295.1 K  
 D1 1.00000000 sec  
 TD0 1  
 SFO1 400.2024712 MHz  
 NUC1 1H  
 P1 13.50 usec  
 PLW1 13.00000000 W

F2 - Processing parameters  
 SI 65536  
 SF 400.2000000 MHz  
 WDW EM  
 SSB 0  
 LB 0.30 Hz  
 GB 0  
 PC 1.00

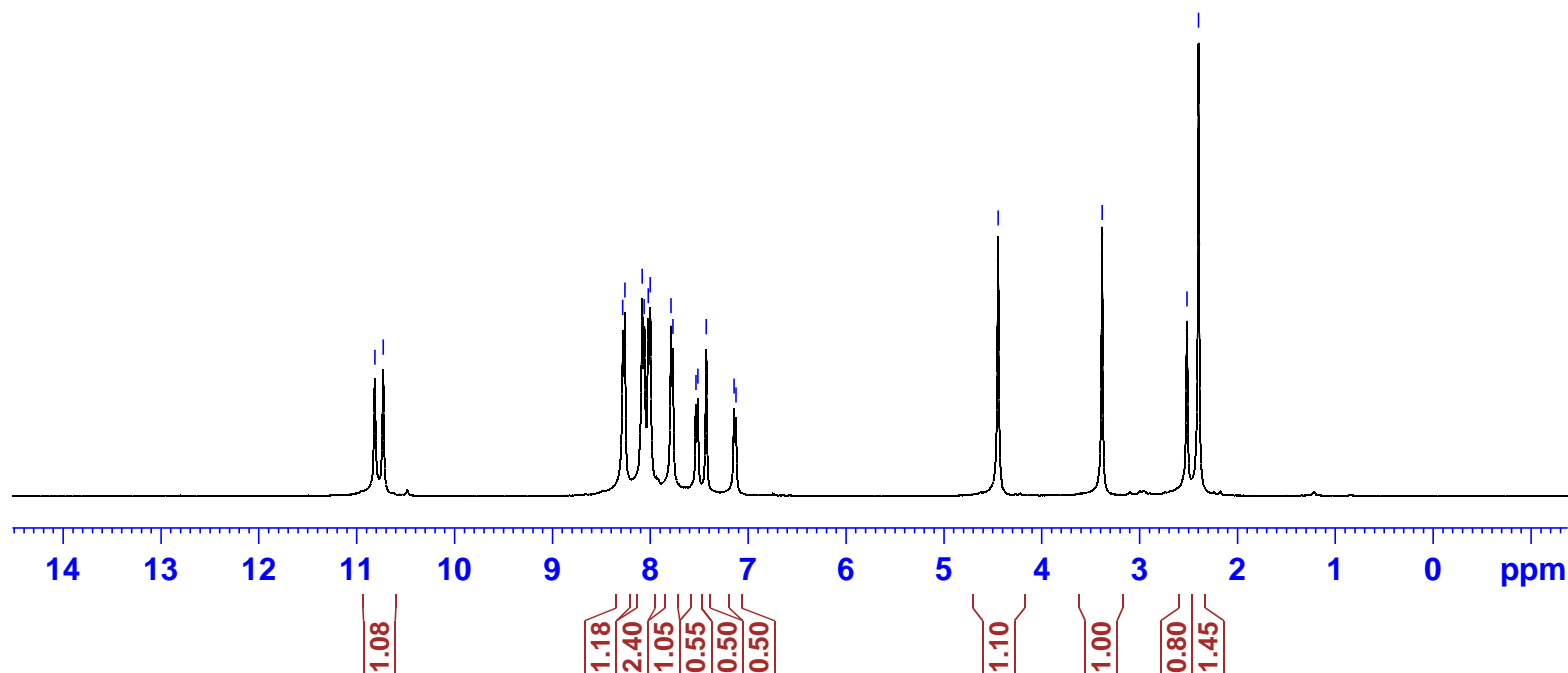

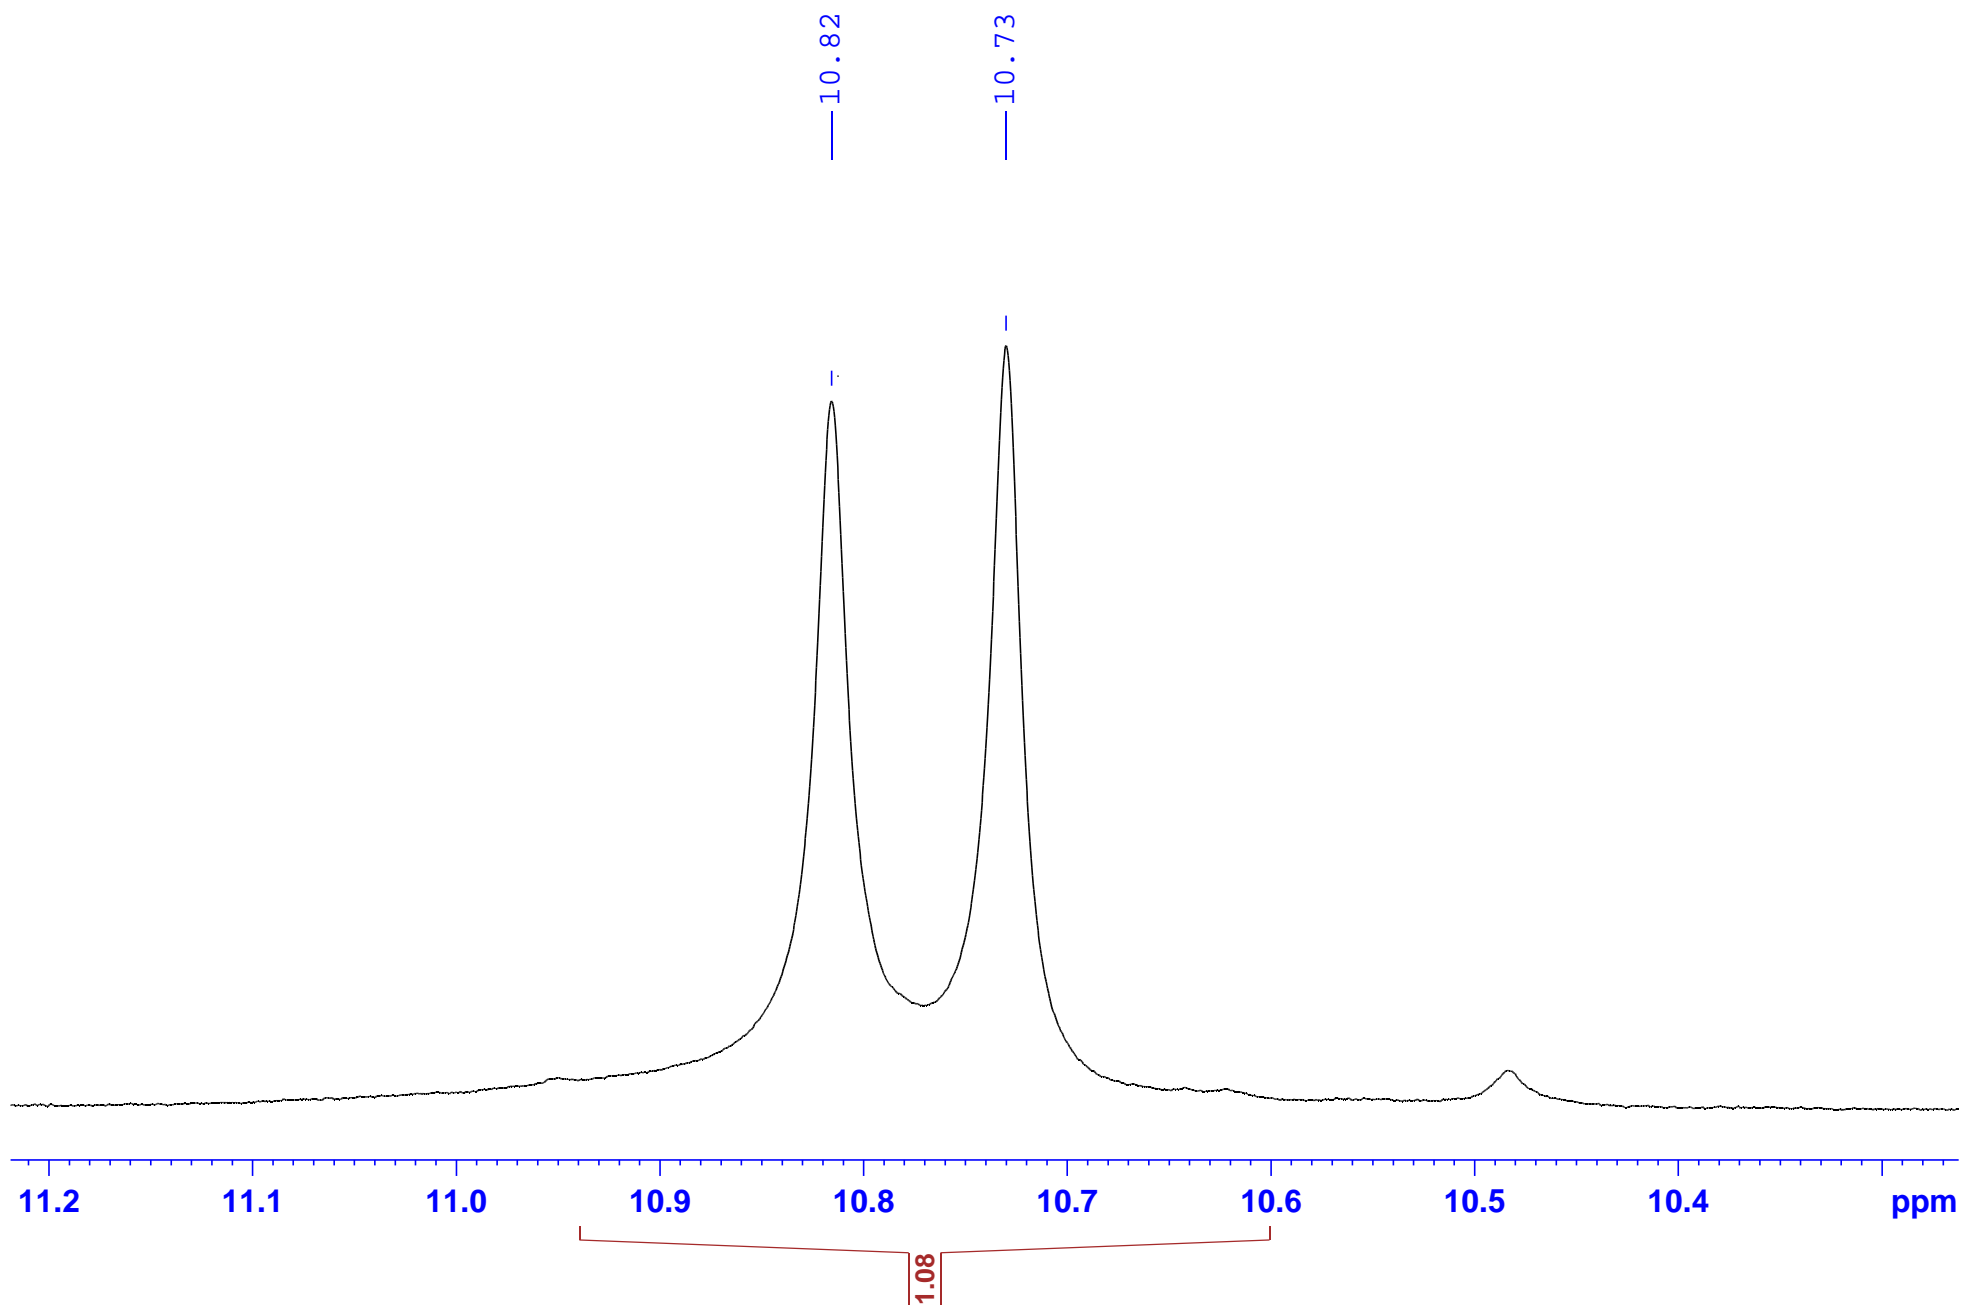

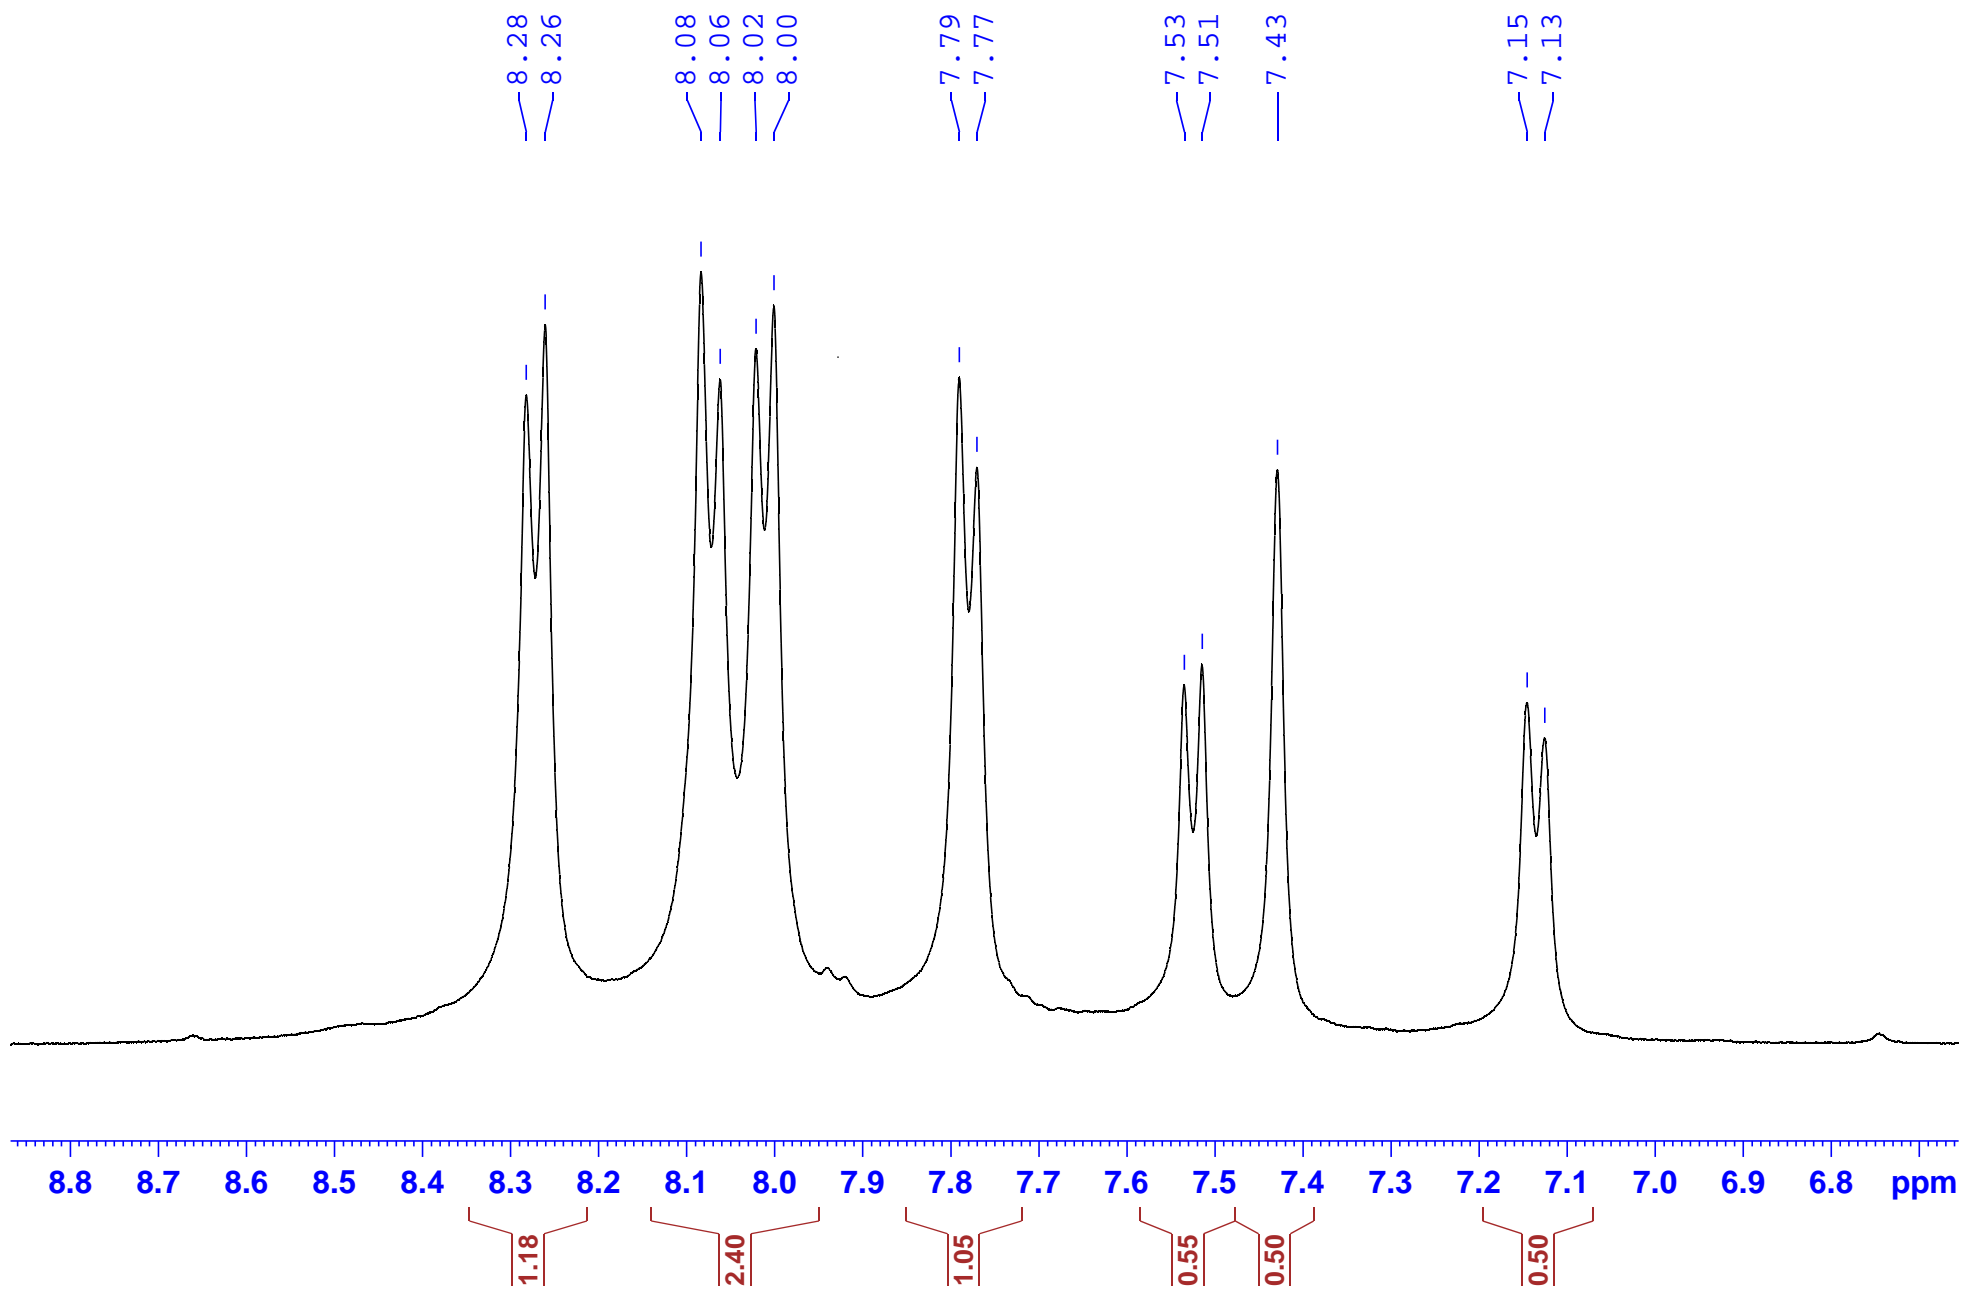

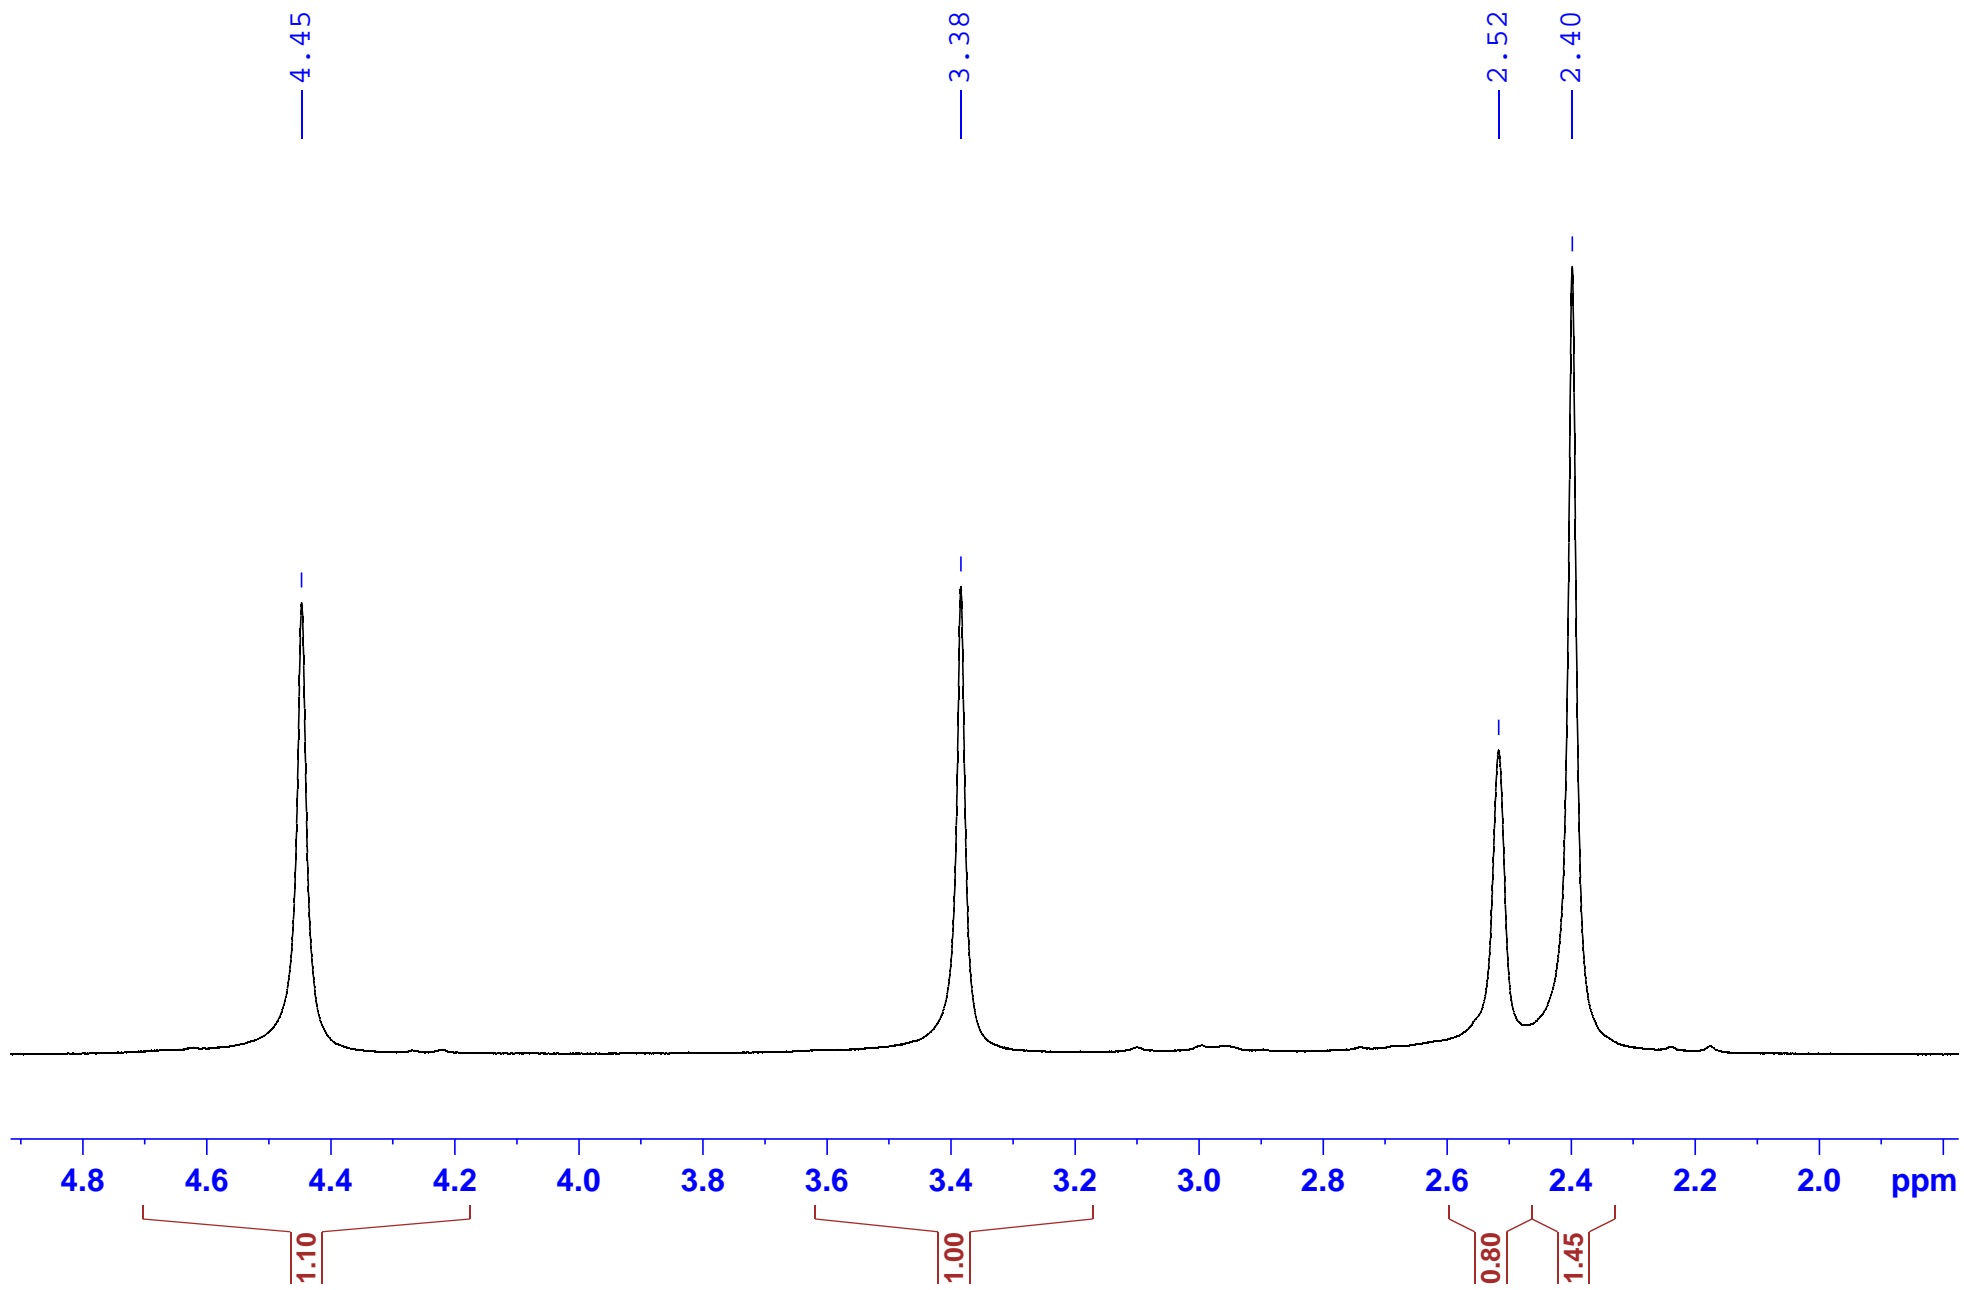

# Cairo University Micro Analytical Center

## DI Analysis Shimadzu Qp-2010 Plus

## Sample Information

Analyzed by : Dr. Mai Younis  
 Analyzed : 01/01/2007 09:47:42  
 Sample Name : 10  
 Sample ID :  
 Customer Name : Dr. Radwan Saeed - Pharmacy - Helwan  
 Data File : C:\GCMSsolution\Data\Project1\10.QGD  
 Org Data File : C:\GCMSsolution\Data\Project1\10.QGD  
 Method File : C:\GCMSsolution\Data\Project1\High Temperature Op  
 Org Method File : C:\GCMSsolution\Data\Project1\High Temperature Op  
 Report File :  
 Tuning File : C:\GCMSsolution\System\Tune1\default.qgt  
 \$EndIf\$Modified by : Dr. Mai Younis  
 Modified : 01/01/2007 09:51:45

## Method

Analytical Line 1  
 IonSourceTemp : 250.00 °C  
 [MS Table]  
 --Group 1 - Event 1--  
 Start Time : 0.00min  
 End Time : 10.00min  
 ACQ Mode : Scan  
 Event Time : 0.50sec  
 Scan Speed : 1250  
 Start m/z : 50.00  
 End m/z : 600.00

Electron Voltage : 70 eV  
 Ionization Mode : EI

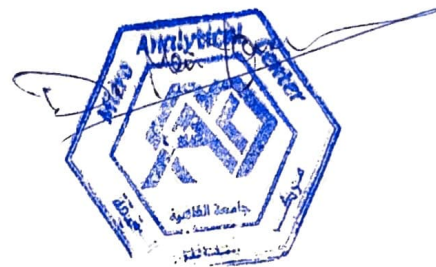

C:\GCMSsolution\Data\Project1\10.QGD

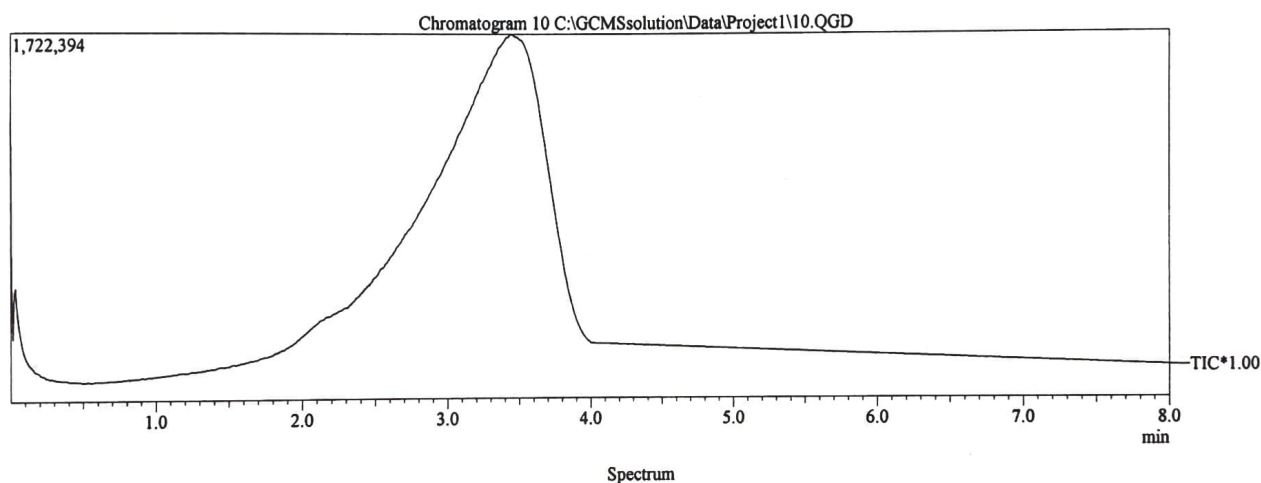

Line#:1 R.Time:3.4(Scan#:410)  
 MassPeaks:229  
 RawMode:Single 3.4(410) BasePeak:120(235859)  
 BG Mode:None Group 1 - Event 1

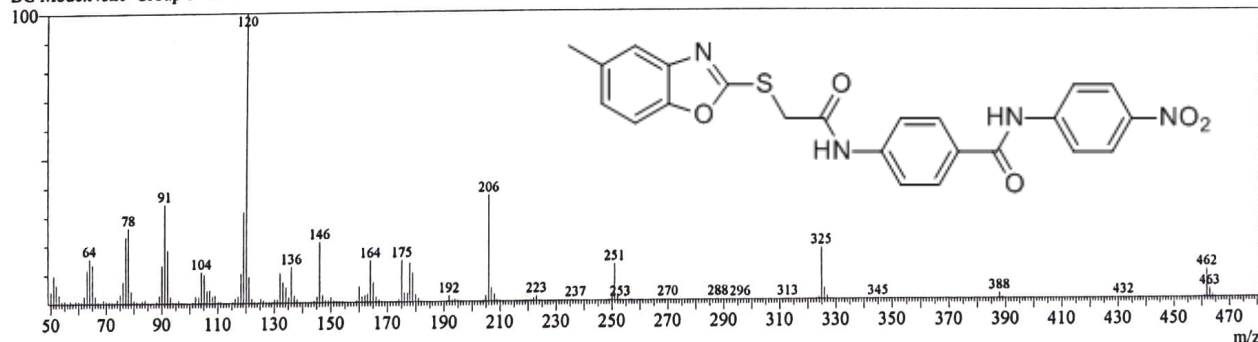

## Mass Table

Line#:1 R.Time:3.4(Scan#:410)

MassPeaks:229

RawMode:Single 3.4(410) BasePeak:120(235859)

BG Mode:None Group 1 - Event 1

| # | m/z   | Abs. In | Rel. Int. | # | m/z   | Abs. In | Rel. Int. | # | m/z   | Abs. In | Rel. Int. |
|---|-------|---------|-----------|---|-------|---------|-----------|---|-------|---------|-----------|
| 1 | 50.00 | 10159   | 4.31      | 4 | 53.00 | 7428    | 3.15      | 7 | 56.05 | 943     | 0.40      |
| 2 | 51.00 | 23111   | 9.80      | 5 | 54.00 | 2020    | 0.86      | 8 | 57.05 | 2349    | 1.00      |
| 3 | 52.00 | 15366   | 6.51      | 6 | 55.00 | 2465    | 1.05      | 9 | 58.00 | 1505    | 0.64      |



# IR of compound 8g

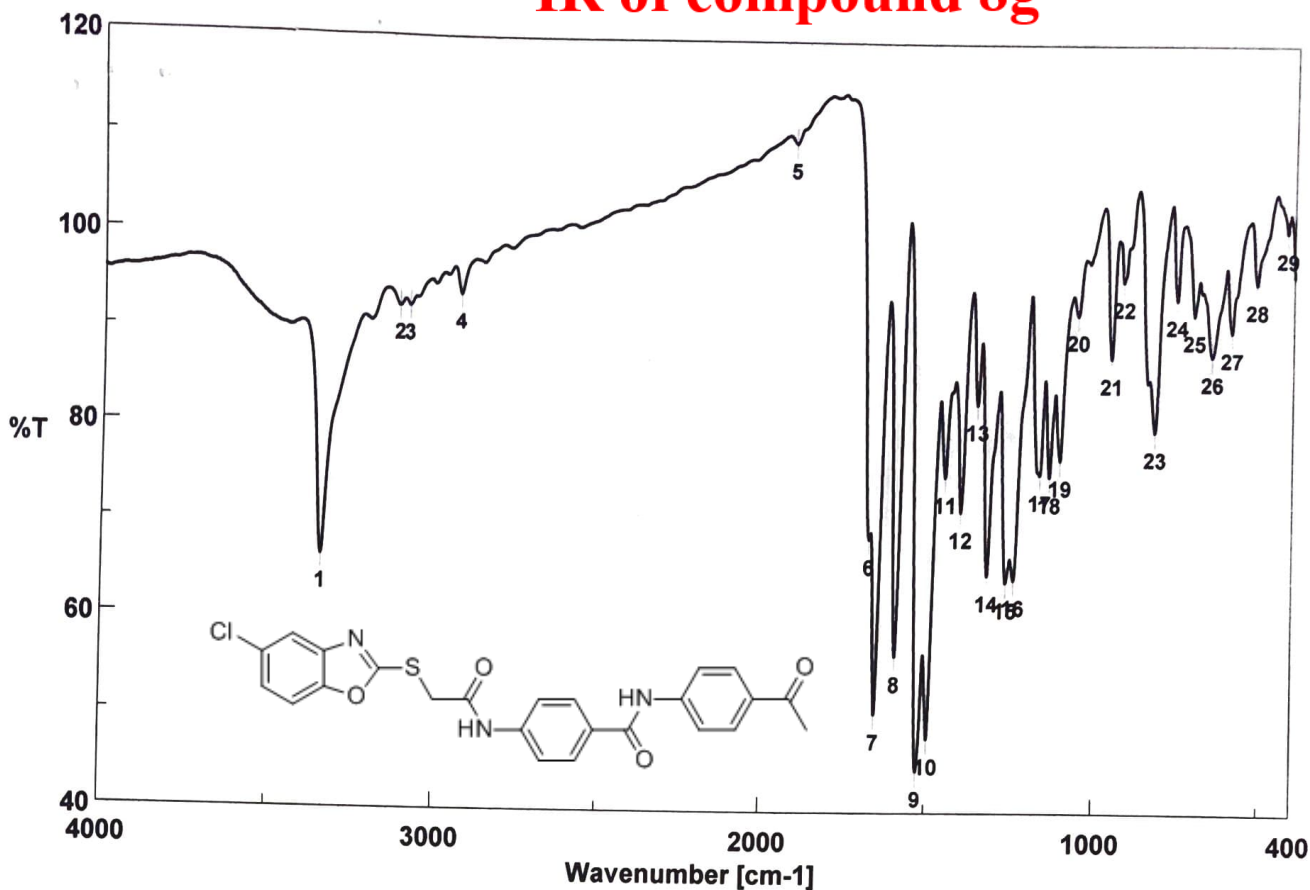

Accumulation 16  
 Resolution 4 cm-1  
 Zero Filling ON  
 Apodization Cosine  
 Gain Auto (2)  
 Scanning Speed Auto (2 mm/sec)  
 Date/Time 8/22/2021 1:55PM  
 Update 8/22/2021 1:56PM  
 Operator IR  
 File Name Memory#101  
 Sample Name CBA-7  
 Comment

| No. | cm-1    | %T      | No. | cm-1    | %T      | No. | cm-1    | %T      |
|-----|---------|---------|-----|---------|---------|-----|---------|---------|
| 1   | 3338.18 | 66.1963 | 2   | 3109.65 | 92.103  | 3   | 3078.8  | 92.0965 |
| 4   | 2924.52 | 93.3319 | 5   | 1913.04 | 109.492 | 6   | 1676.8  | 68.2822 |
| 7   | 1654.62 | 50.2842 | 8   | 1595.81 | 56.2287 | 9   | 1526.38 | 44.3792 |
| 10  | 1495.53 | 47.7376 | 11  | 1451.17 | 74.7303 | 12  | 1403.92 | 71.1495 |
| 13  | 1356.68 | 82.3219 | 14  | 1322.93 | 64.5646 | 15  | 1267.97 | 63.8556 |
| 16  | 1244.83 | 64.1412 | 17  | 1167.69 | 75.0515 | 18  | 1138.76 | 74.8483 |
| 19  | 1107.9  | 76.5776 | 20  | 1056.8  | 91.8273 | 21  | 955.555 | 87.2822 |
| 22  | 919.879 | 95.3831 | 23  | 820.563 | 79.6789 | 24  | 756.923 | 93.5456 |
| 25  | 703.89  | 91.9924 | 26  | 647.965 | 87.6714 | 27  | 589.147 | 90.2032 |
| 28  | 513.936 | 95.3286 | 29  | 423.298 | 100.768 |     |         |         |

فاطمة  
 محمد

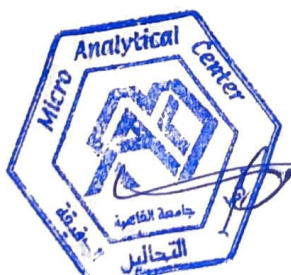



# <sup>1</sup>H NMR of compound 8g

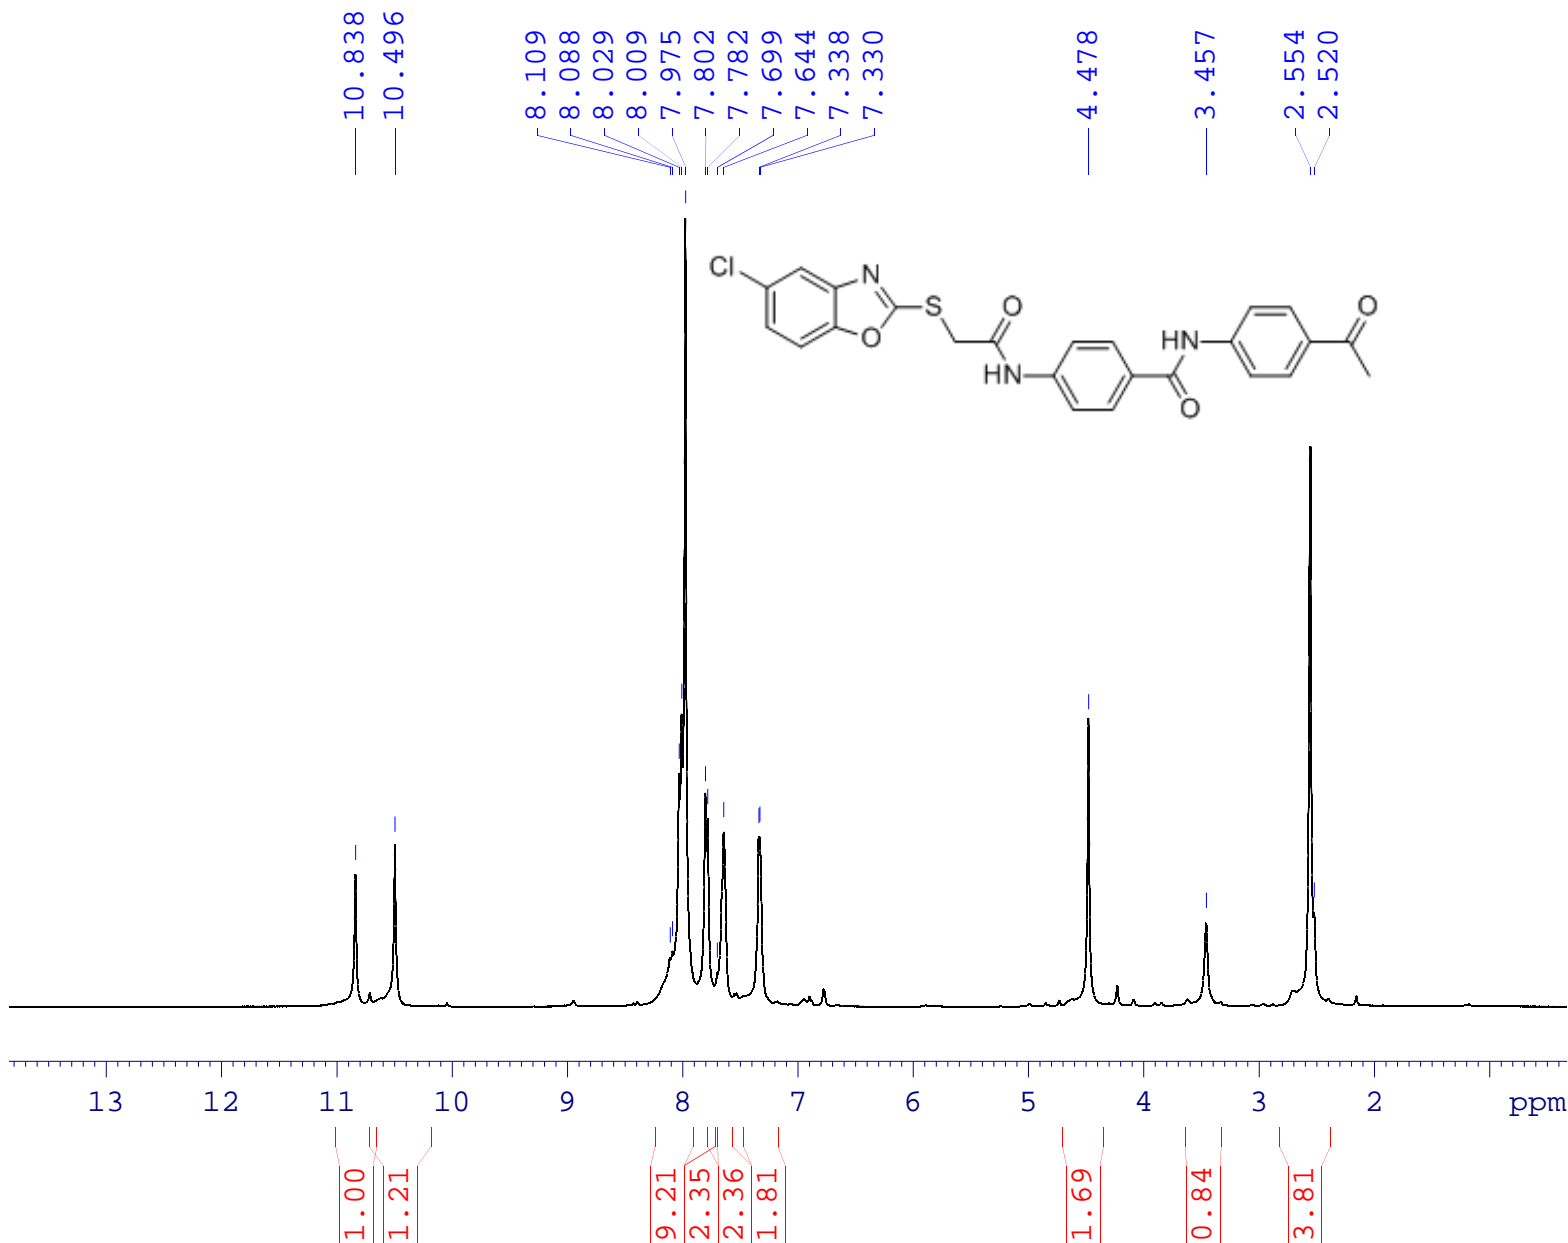

Current Data Parameters  
NAME Ibrahim Eissa- MBA-7-proton-DMSO-D  
EXPNO 10  
PROCNO 1

F2 - Acquisition Parameters  
Date\_ 20220111  
Time 12.53 h  
INSTRUM spect  
PROBHD Z108618\_0945 (   
PULPROG zg30  
TD 65536  
SOLVENT DMSO  
NS 16  
DS 2  
SWH 8012.820 Hz  
FIDRES 0.244532 Hz  
AQ 4.0894465 sec  
RG 48.16  
DW 62.400 usec  
DE 6.50 usec  
TE 0 K  
D1 1.00000000 sec  
TD0 1  
SFO1 400.2024712 MHz  
NUC1 1H  
P1 13.50 usec  
PLW1 13.00000000 W

F2 - Processing parameters  
SI 65536  
SF 400.2000000 MHz  
WDW EM  
SSB 0  
LB 0.30 Hz  
GB 0  
PC 1.00

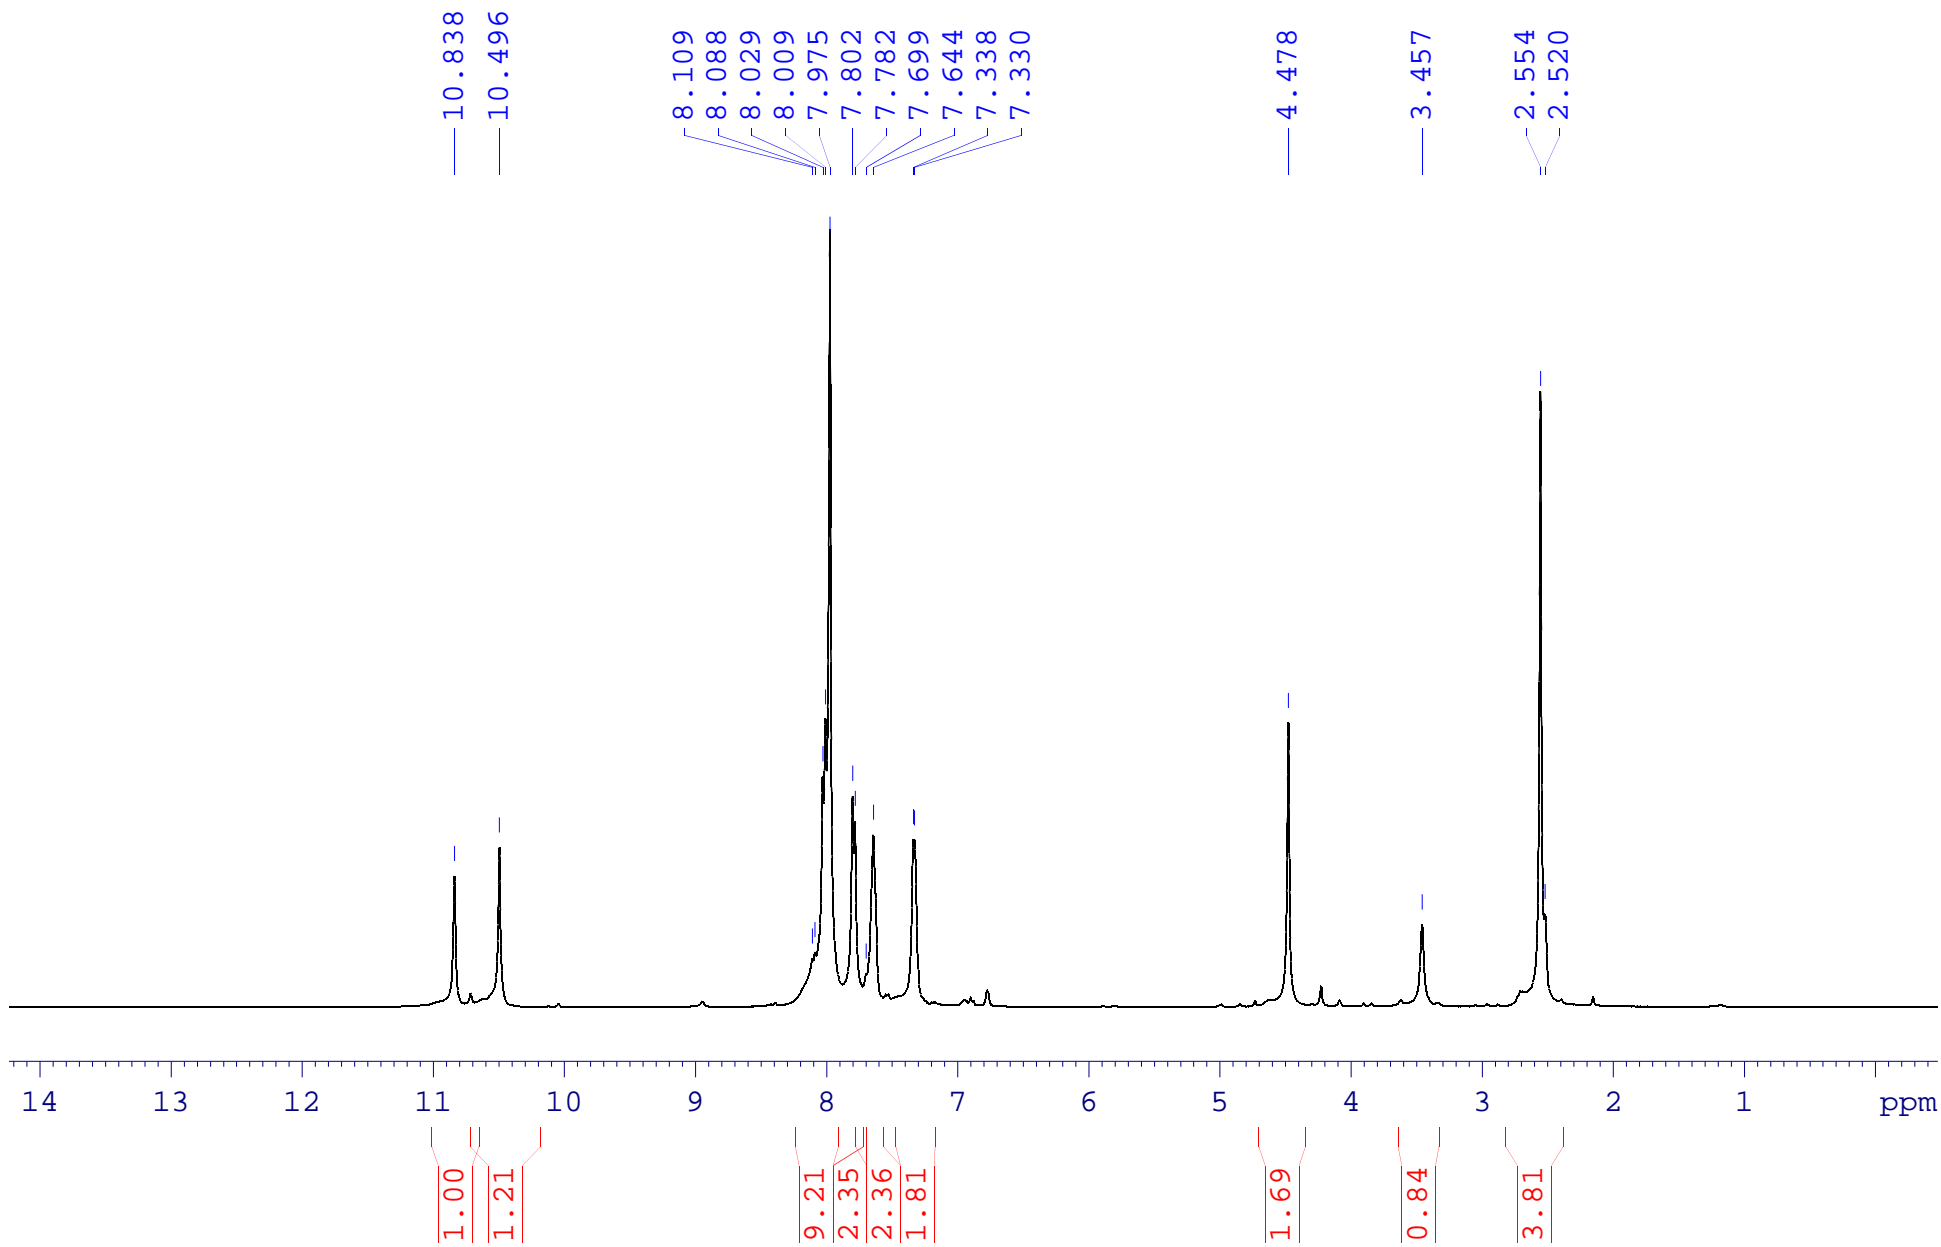

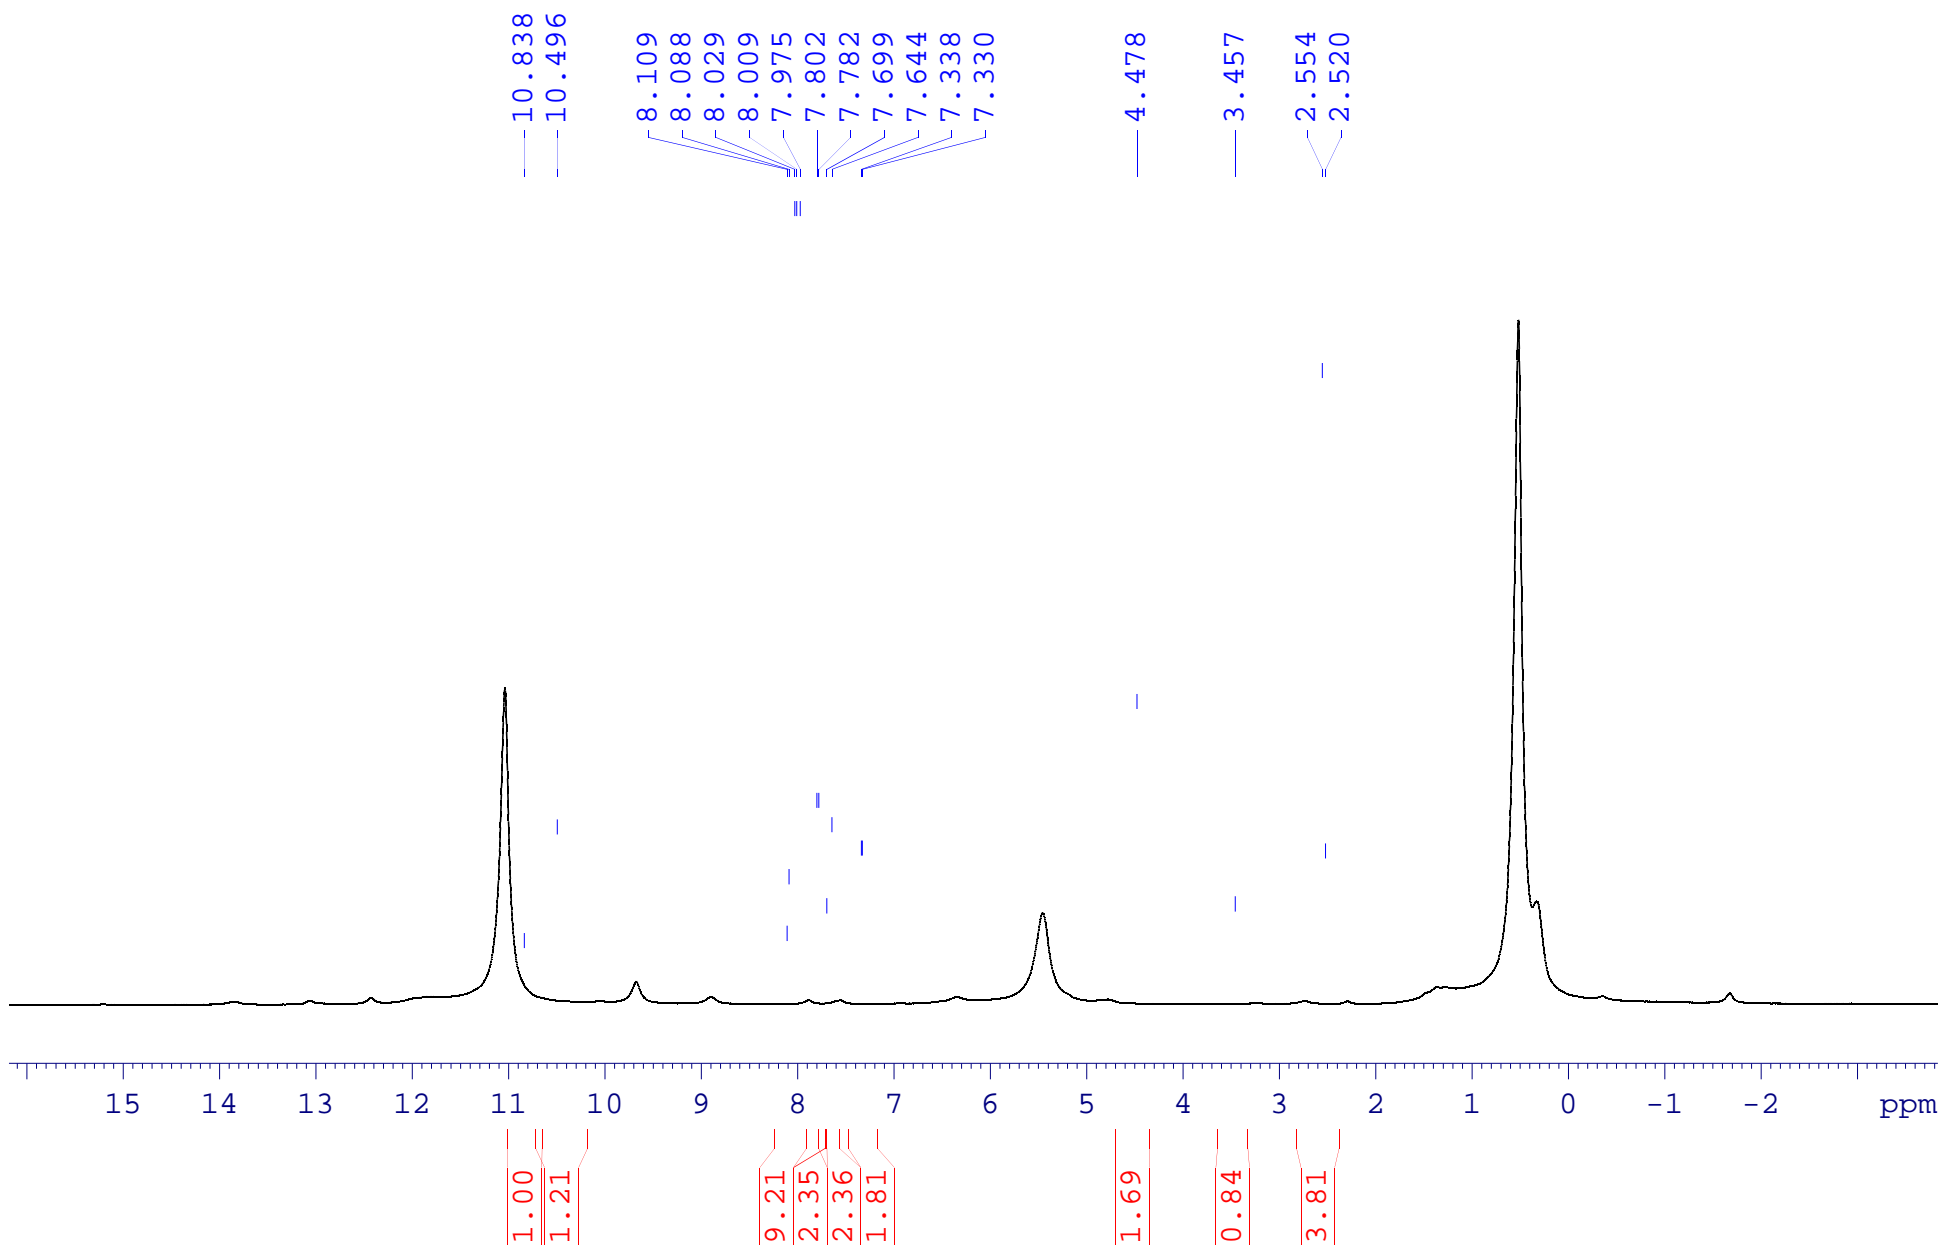

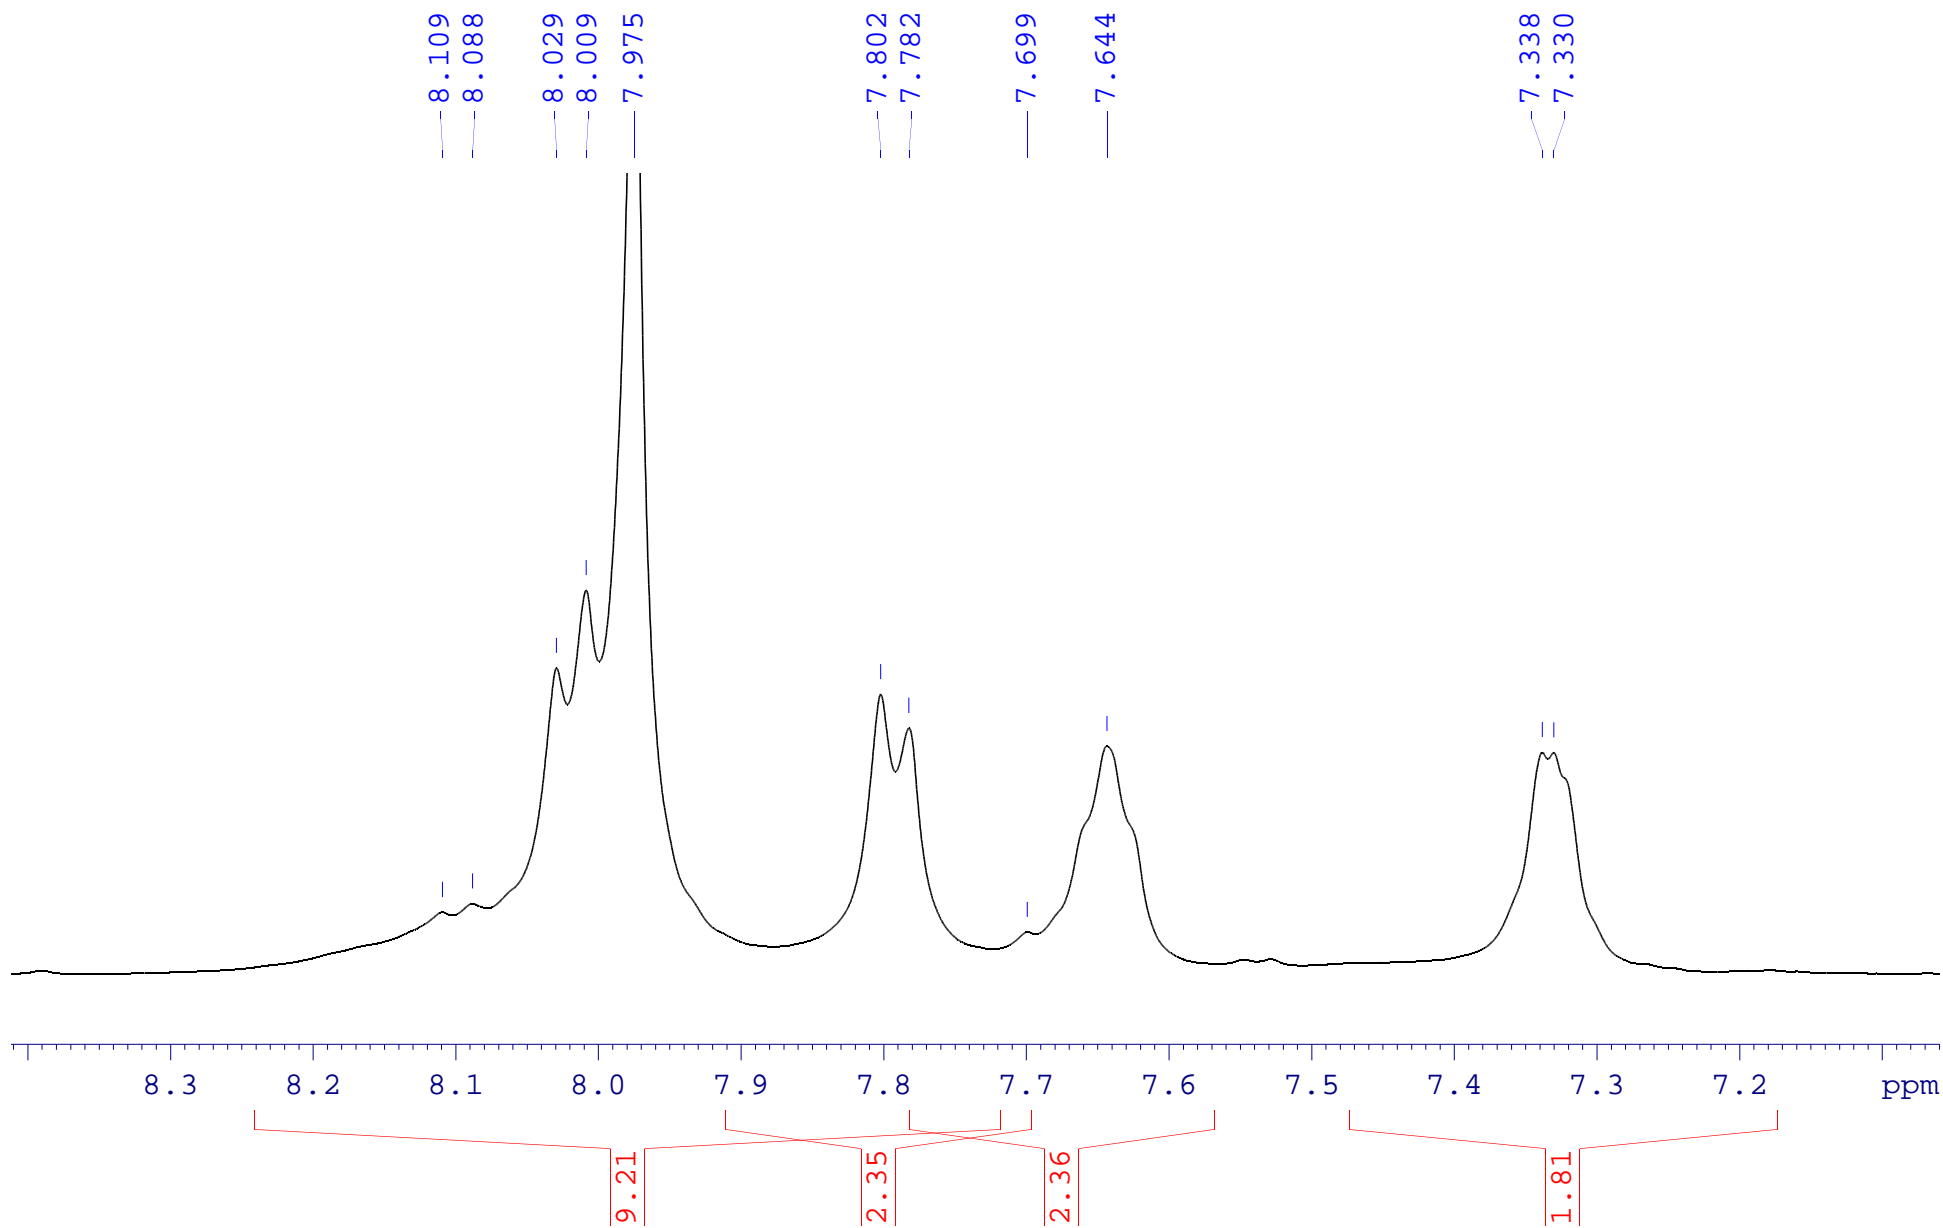

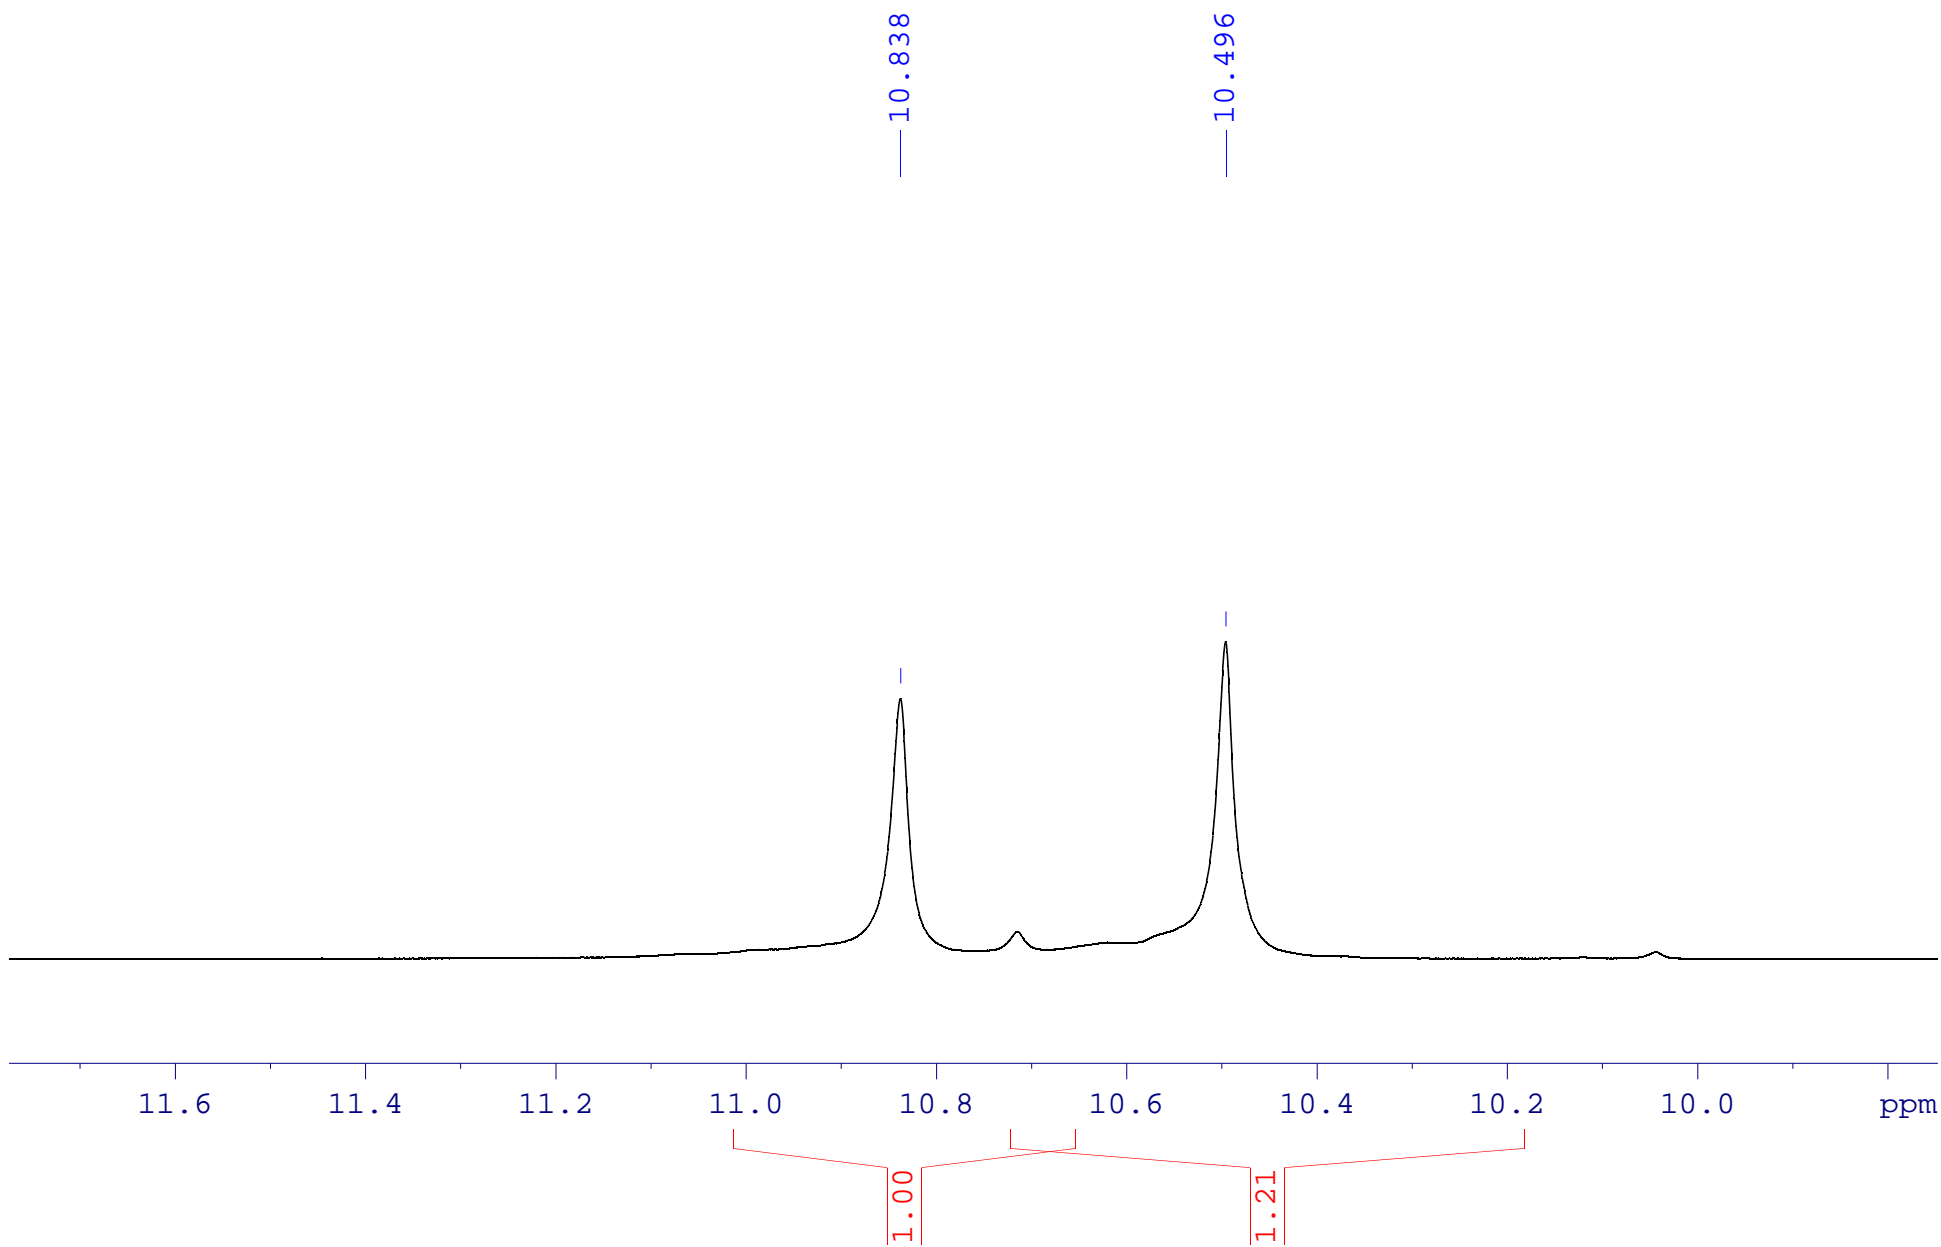

# <sup>13</sup>C NMR of compound 8g

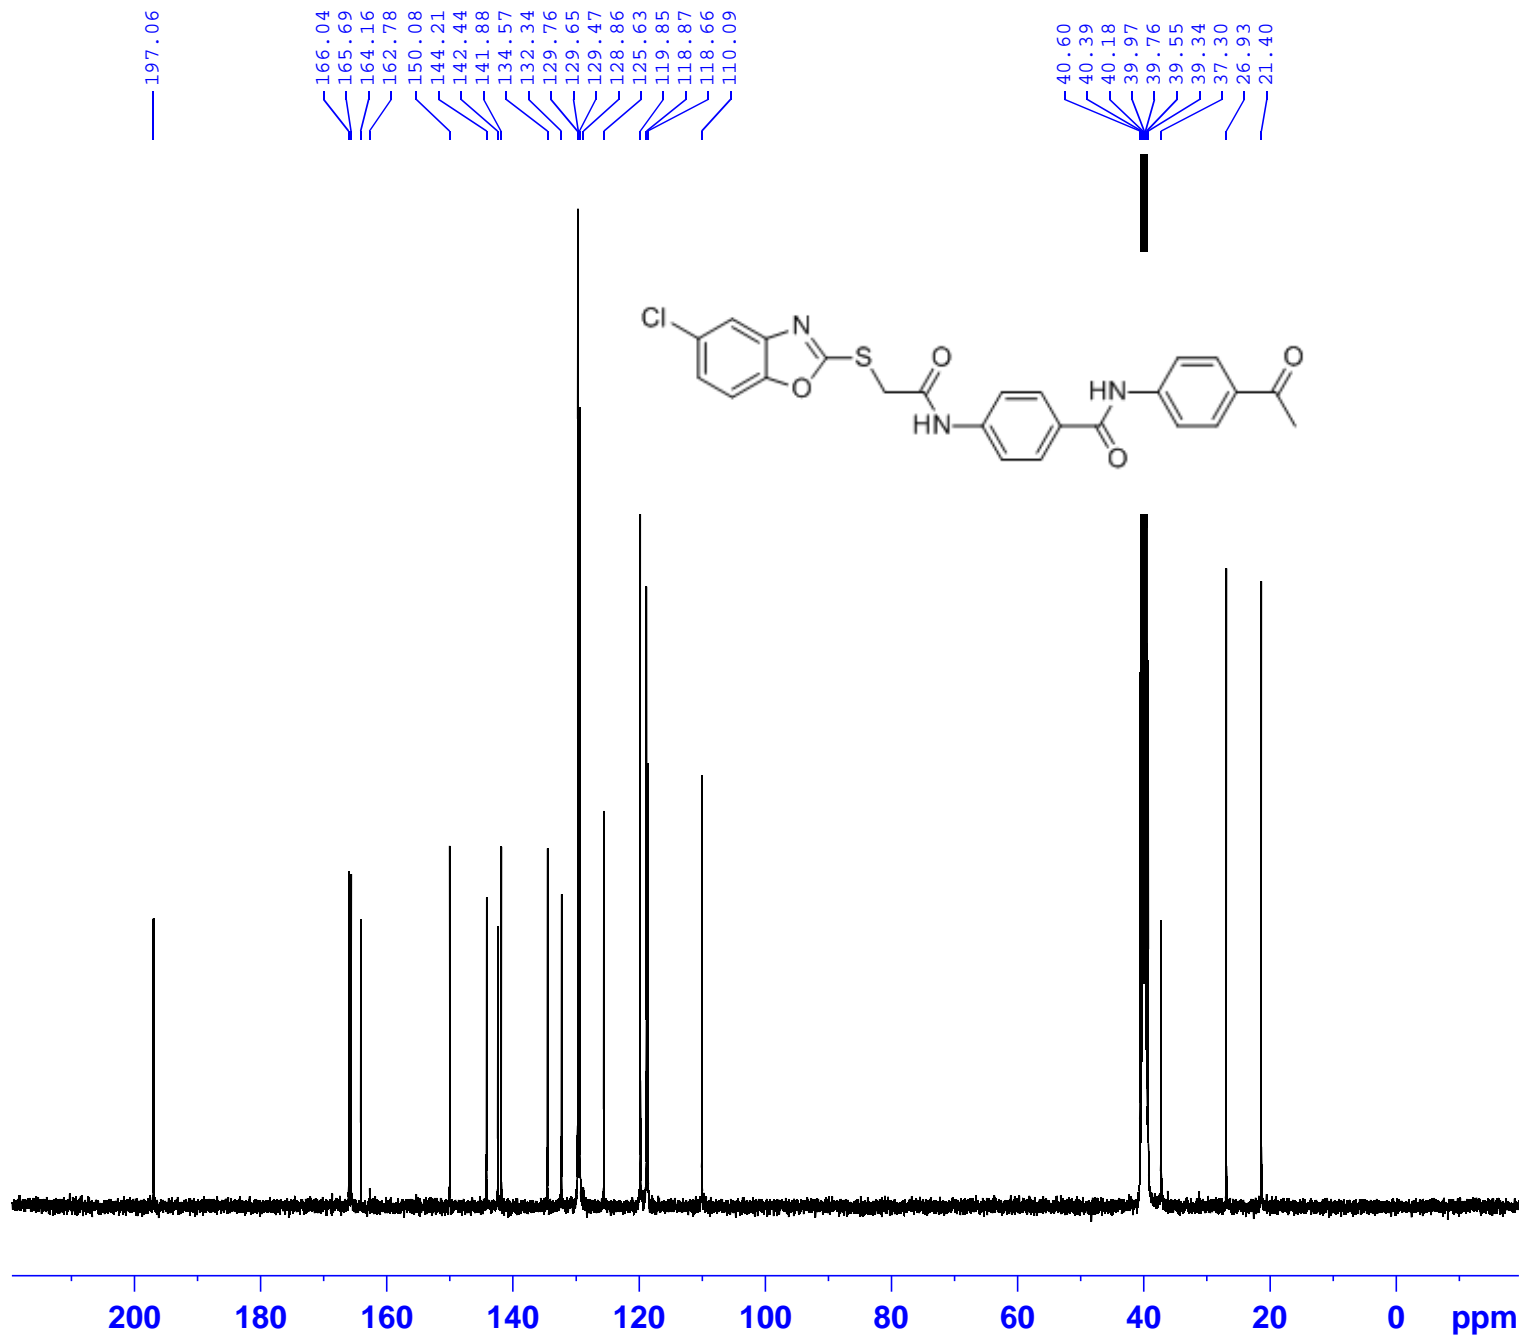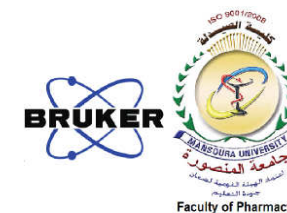

Current Data Parameters  
 NAME ebrahim essa cba-7 (red) -M c13  
 EXPNO 10  
 PROCNO 1

F2 - Acquisition Parameters  
 Date\_ 20220112  
 Time 8.45 h  
 INSTRUM spect  
 PROBHD Z108618\_0945 ( )  
 PULPROG zgpg30  
 TD 65536  
 SOLVENT DMSO  
 NS 2200  
 DS 4  
 SWH 24038.461 Hz  
 FIDRES 0.733596 Hz  
 AQ 1.3631488 sec  
 RG 197.77  
 DW 20.800 usec  
 DE 6.50 usec  
 TE 619.8 K  
 D1 2.00000000 sec  
 D11 0.03000000 sec  
 TD0 1  
 SFO1 100.6404331 MHz  
 NUC1 13C  
 P1 10.00 usec  
 PLW1 47.00000000 W  
 SFO2 400.2016008 MHz  
 NUC2 1H  
 CPDPRG[2] waltz16  
 PCPD2 90.00 usec  
 PLW2 13.00000000 W  
 PLW12 0.29249999 W  
 PLW13 0.14713000 W

F2 - Processing parameters  
 SI 32768  
 SF 100.6303700 MHz  
 WDW EM  
 SSB 0  
 LB 1.00 Hz  
 GB 0  
 PC 1.40

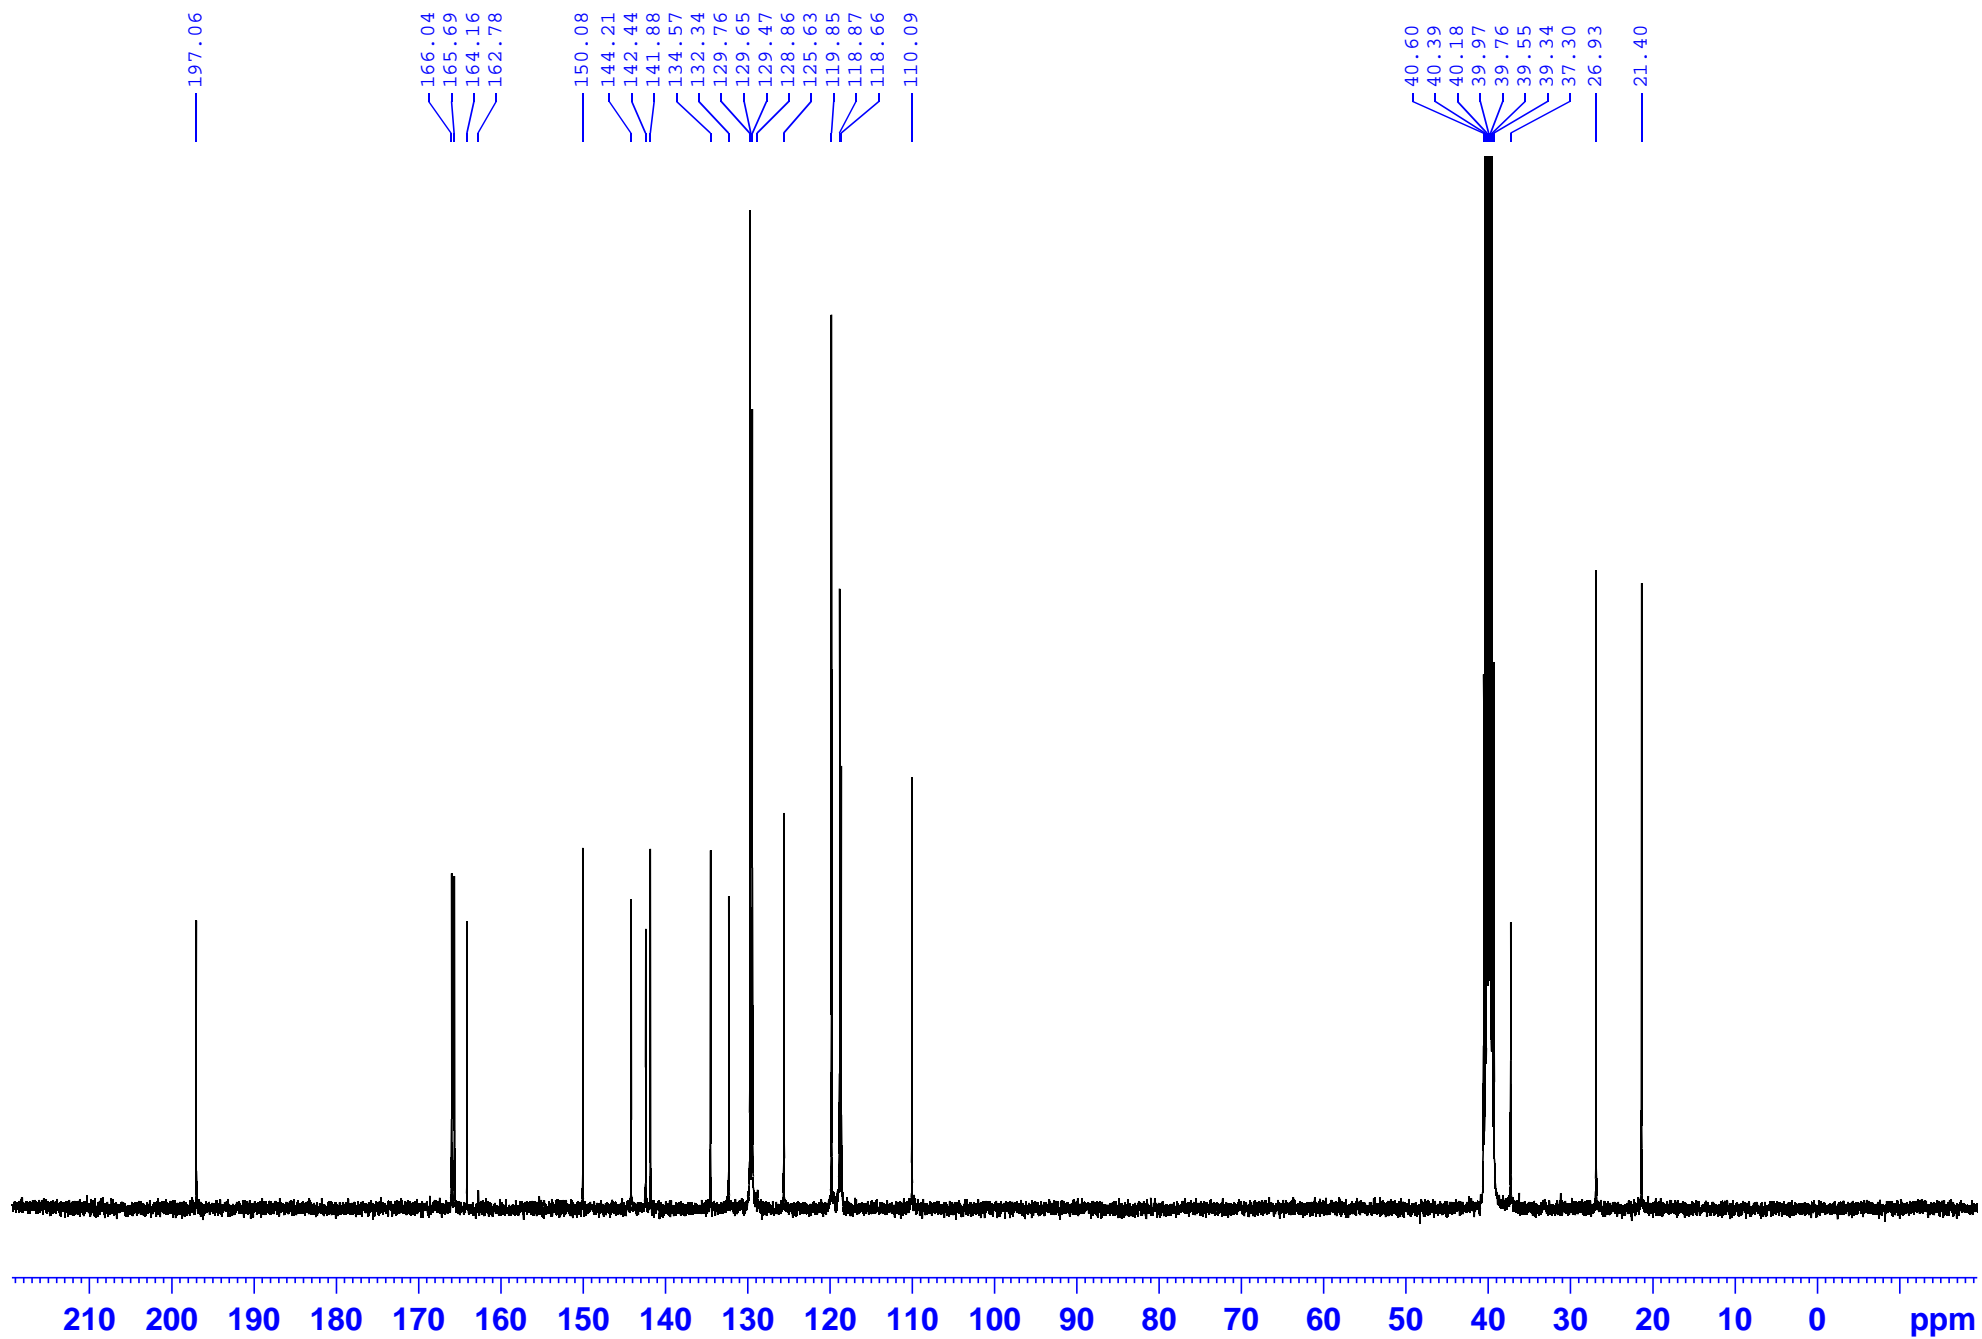

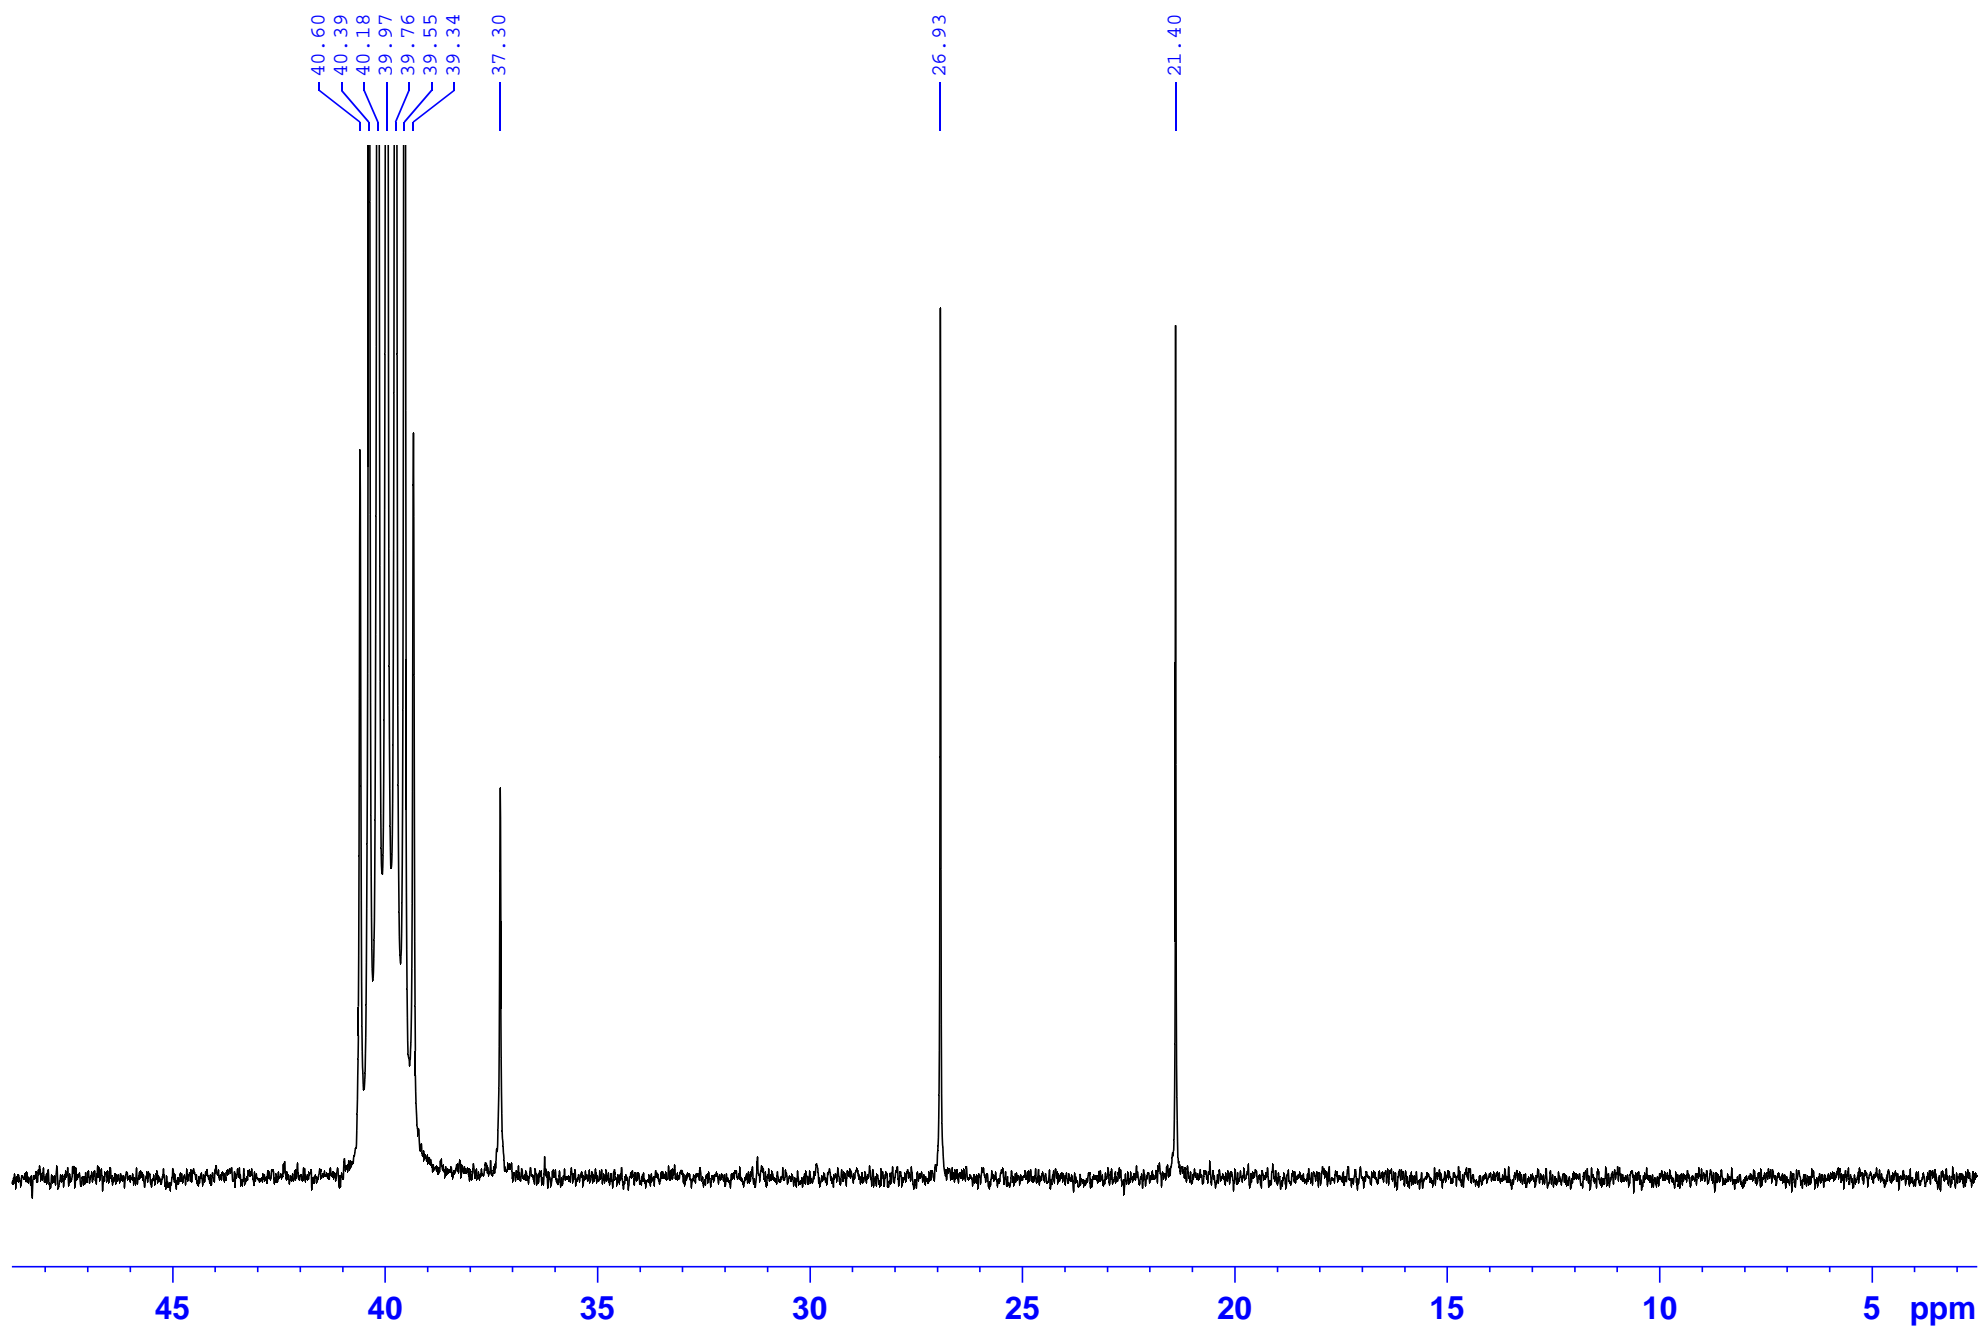



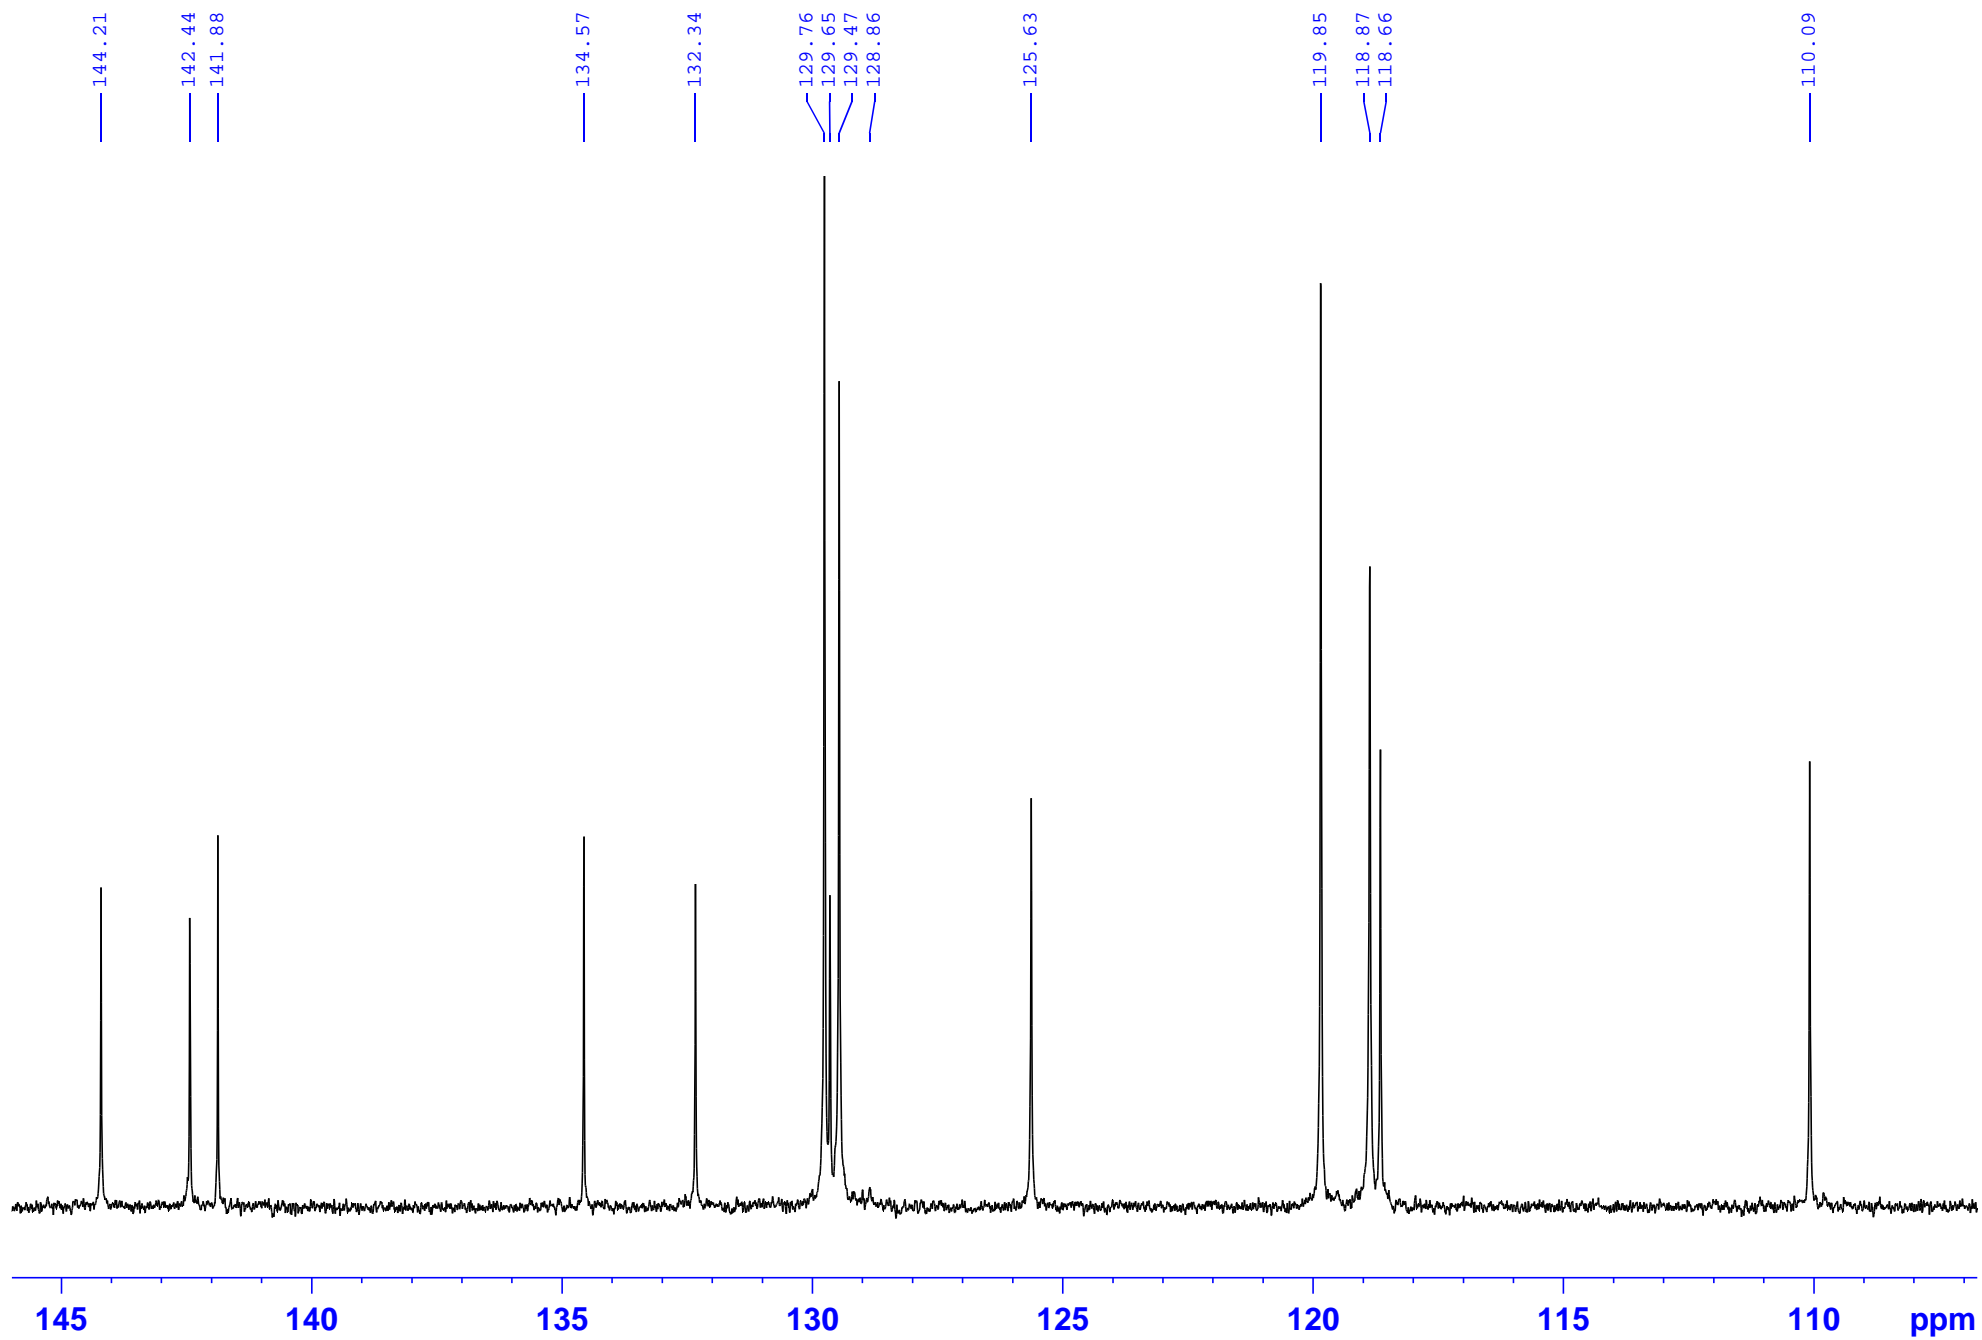

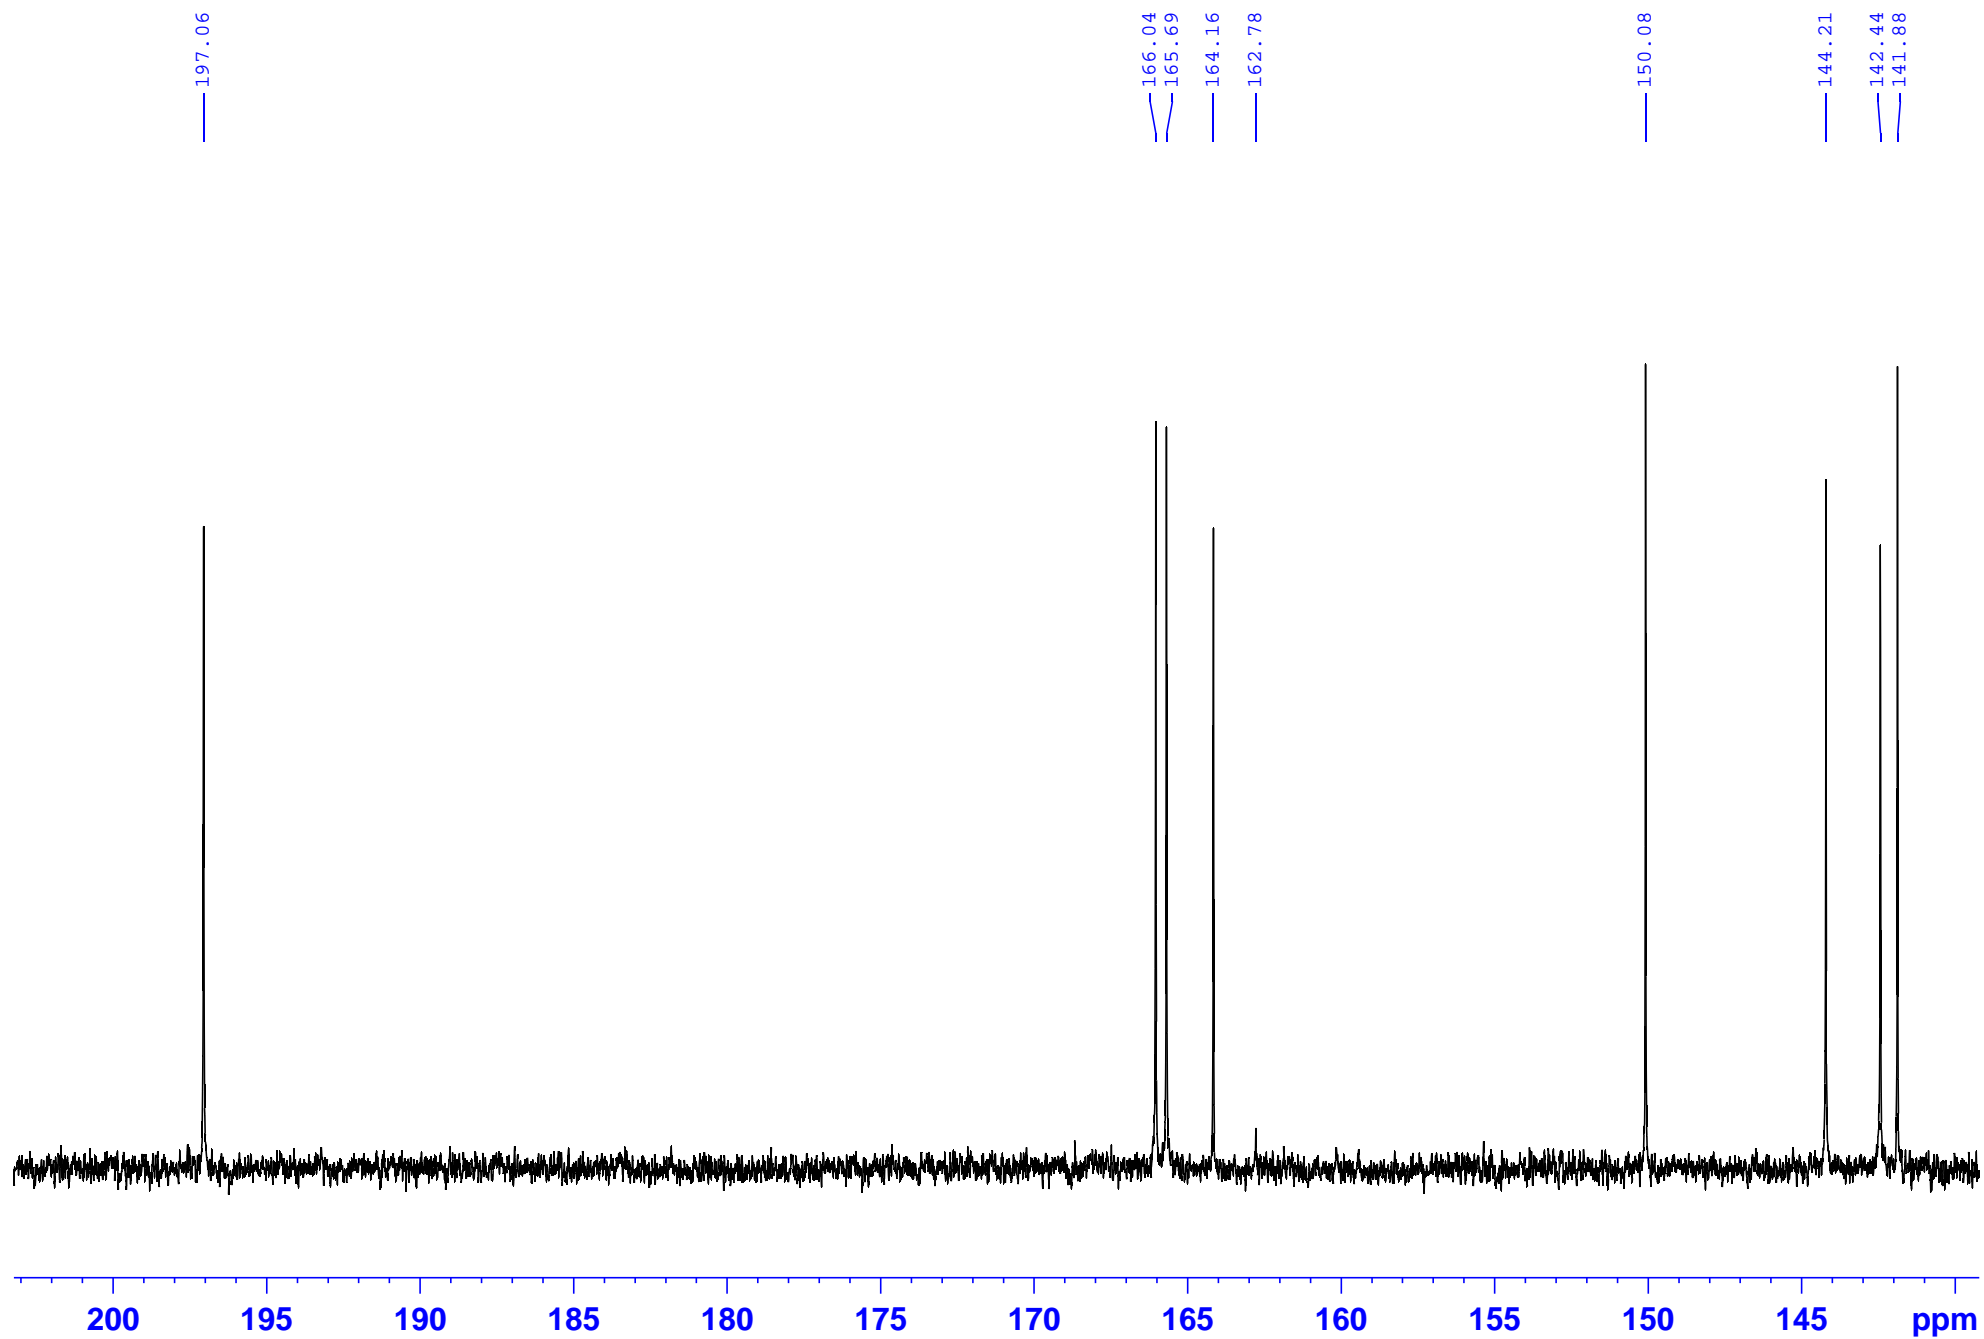

# Cairo University Micro Analytical Center

## DI Analysis Shimadzu Qp-2010 Plus

## Sample Information

Analyzed by : Dr. Mai Younis  
 Analyzed : 01/01/2007 09:12:10  
 Sample Name : 6  
 Sample ID :  
 Customer Name : Dr. Radwan Saeed - Pharmacy - Helwan  
 Data File : C:\GCMSsolution\Data\Project1\6.QGD  
 Org Data File : C:\GCMSsolution\Data\Project1\6.QGD  
 Method File : C:\GCMSsolution\Data\Project1\High Temperature Op  
 Org Method File : C:\GCMSsolution\Data\Project1\High Temperature Op  
 Report File :  
 Tuning File : C:\GCMSsolution\System\Tune1\default.qgt  
 \$EndIf\$Modified by : Dr. Mai Younis  
 Modified : 01/01/2007 09:16:46

## Method

Analytical Line 1  
 IonSourceTemp : 250.00 °C  
 [MS Table]  
 --Group 1 - Event 1--  
 Start Time : 0.00min  
 End Time : 10.00min  
 ACQ Mode : Scan  
 Event Time : 0.50sec  
 Scan Speed : 1250  
 Start m/z : 50.00  
 End m/z : 600.00

Electron Voltage : 70 eV  
 Ionization Mode : EI

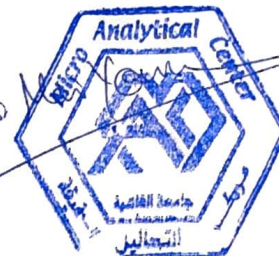

C:\GCMSsolution\Data\Project1\6.QGD

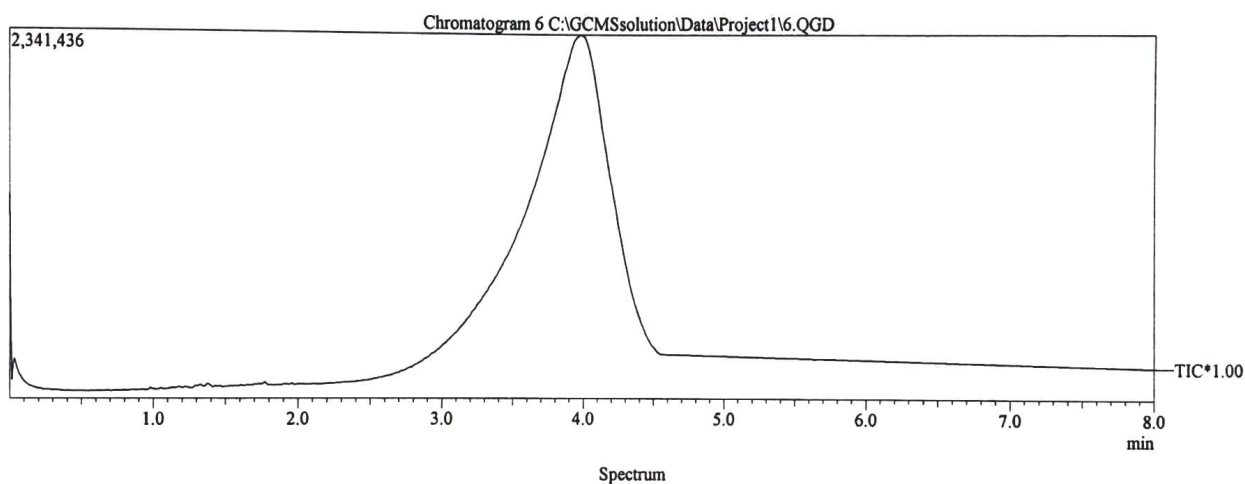

Line#:1 R.Time:4.0(Scan#:480)

MassPeaks:274

RawMode:Single 4.0(480) BasePeak:120(366373)

BG Mode:None Group 1 - Event 1

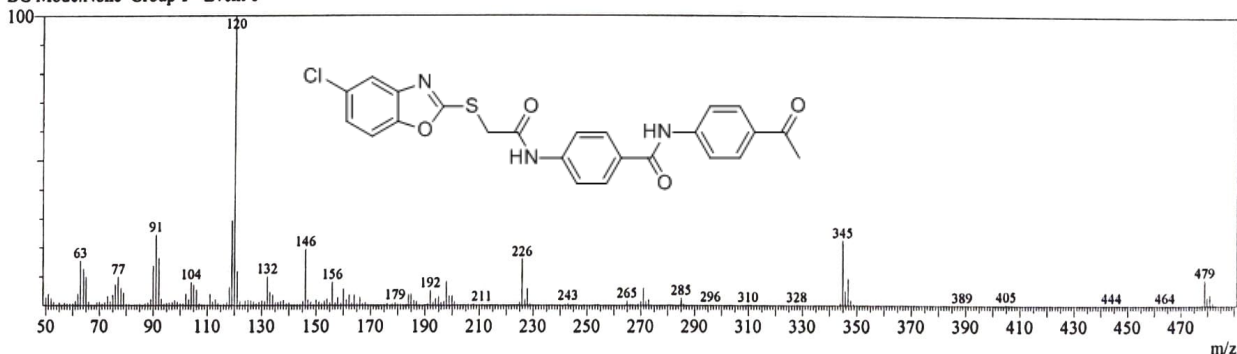

## Mass Table

Line#:1 R.Time:4.0(Scan#:480)

MassPeaks:274

RawMode:Single 4.0(480) BasePeak:120(366373)

BG Mode:None Group 1 - Event 1

| # | m/z   | Abs. In | Rel. Int. | # | m/z   | Abs. In | Rel. Int. | # | m/z   | Abs. In | Rel. Int. |
|---|-------|---------|-----------|---|-------|---------|-----------|---|-------|---------|-----------|
| 1 | 50.00 | 9857    | 2.69      | 4 | 53.00 | 4359    | 1.19      | 7 | 56.05 | 1413    | 0.39      |
| 2 | 51.00 | 14558   | 3.97      | 5 | 54.05 | 1727    | 0.47      | 8 | 57.05 | 3415    | 0.93      |
| 3 | 52.00 | 9274    | 2.53      | 6 | 55.00 | 3511    | 0.96      | 9 | 58.00 | 2670    | 0.73      |

# IR of compound 8h

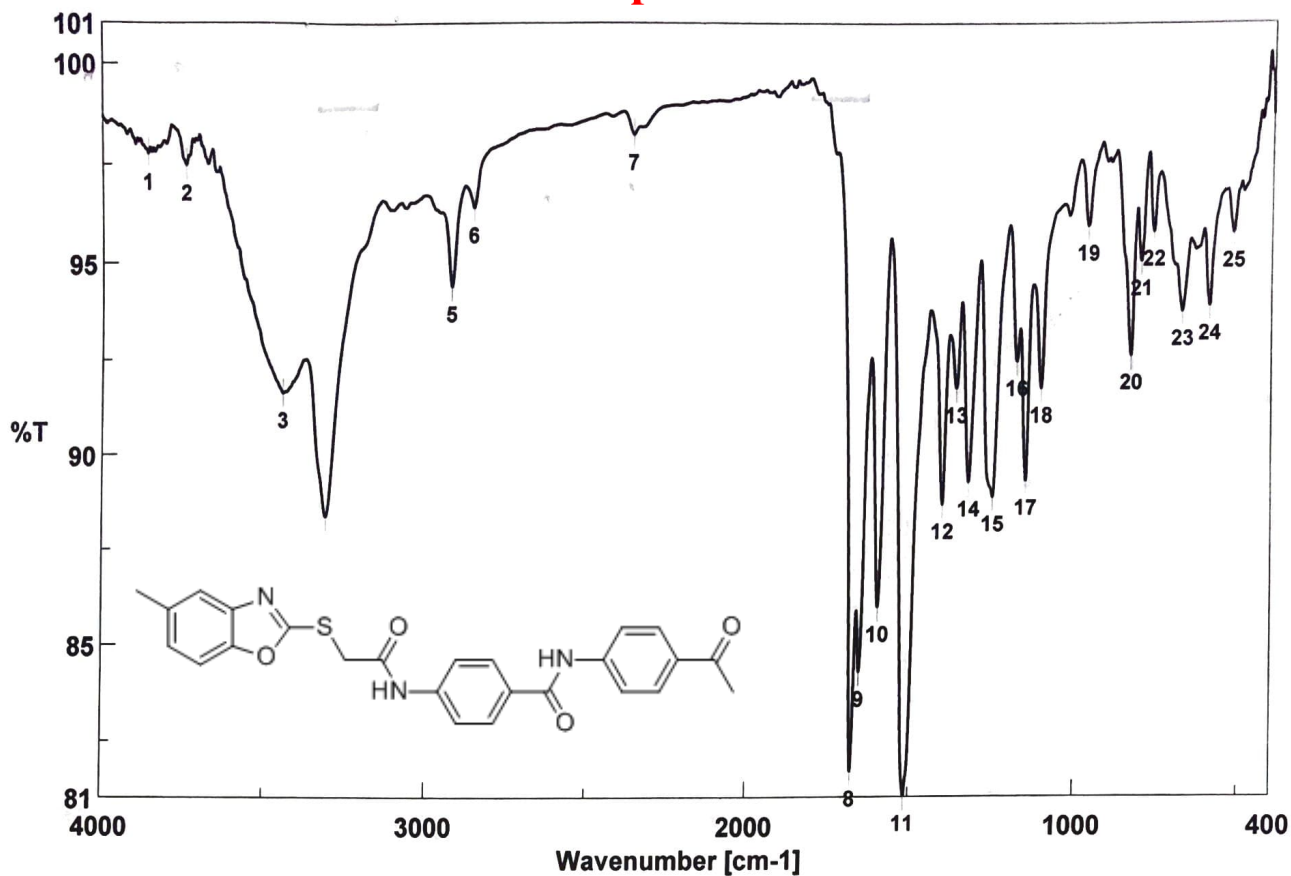

Accumulation 16  
 Resolution 4 cm-1  
 Zero Filling ON  
 Apodization Cosine  
 Gain Auto (2)  
 Scanning Speed Auto (2 mm/sec)  
 Date/Time 8/22/2021 2:08PM  
 Update 8/22/2021 2:09PM  
 Operator IR  
 File Name Memory#129  
 Sample Name MBA -7  
 Comment

| No. | cm-1    | %T      | No. | cm-1    | %T      | No. | cm-1    | %T      |
|-----|---------|---------|-----|---------|---------|-----|---------|---------|
| 1   | 3858.86 | 97.778  | 2   | 3741.23 | 97.499  | 3   | 3438.46 | 91.5807 |
| 4   | 3306.36 | 88.3277 | 5   | 2920.66 | 94.3119 | 6   | 2853.17 | 96.3504 |
| 7   | 2362.37 | 98.1829 | 8   | 1676.8  | 81.6806 | 9   | 1653.66 | 84.2666 |
| 10  | 1598.7  | 85.9334 | 11  | 1513.85 | 81.0351 | 12  | 1404.89 | 88.5881 |
| 13  | 1363.43 | 91.6255 | 14  | 1324.86 | 89.1724 | 15  | 1252.54 | 88.7817 |
| 16  | 1179.26 | 92.327  | 17  | 1151.29 | 89.2078 | 18  | 1105.01 | 91.6272 |
| 19  | 961.341 | 95.8602 | 20  | 829.241 | 92.492  | 21  | 797.421 | 94.9477 |
| 22  | 760.78  | 95.7185 | 23  | 672.071 | 93.6483 | 24  | 589.147 | 93.7833 |
| 25  | 516.829 | 95.6733 |     |         |         |     |         |         |

فاجو  
 محمد

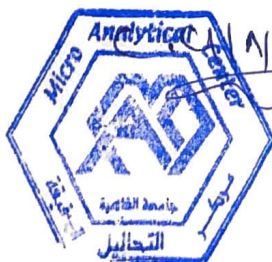

# <sup>1</sup>H NMR of compound 8h

10.81  
10.49

8.02  
7.99  
7.97  
7.94  
7.79  
7.76  
7.53  
7.51  
7.43  
7.14  
7.12

4.45

3.40

2.56  
2.52  
2.39

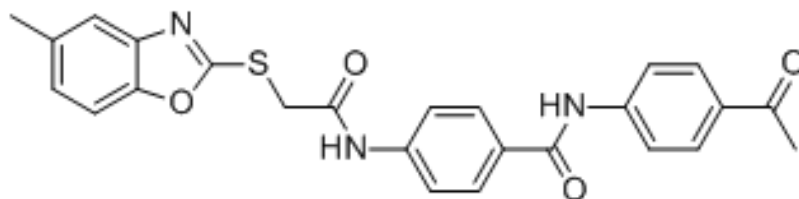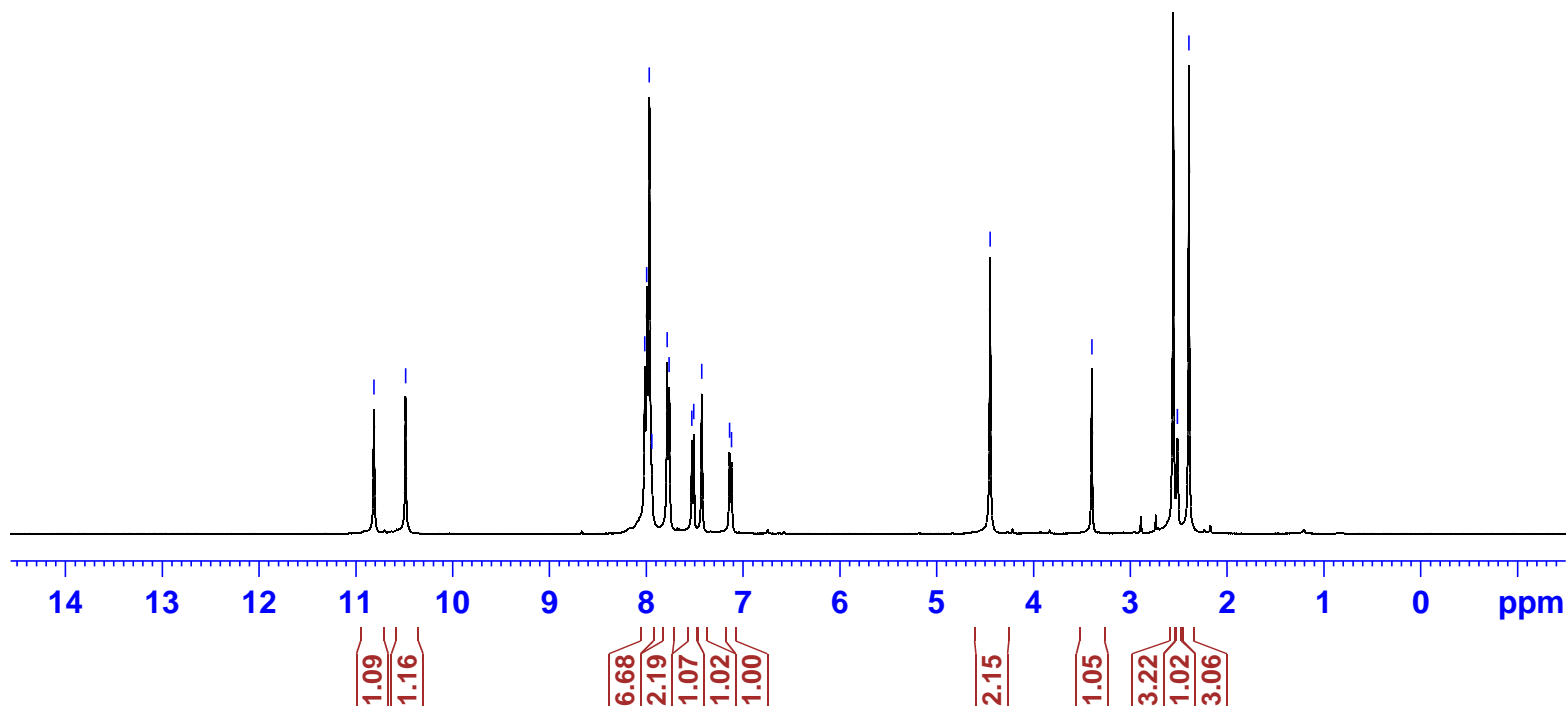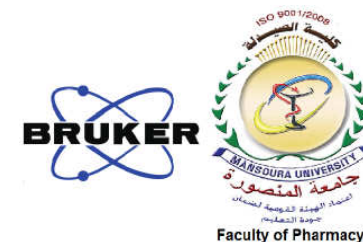

Current Data Parameters  
NAME ebrahim essa cba-7 (red) -M hnmr  
EXPNO 10  
PROCNO 1

F2 - Acquisition Parameters  
Date\_ 20220110  
Time 9.40 h  
INSTRUM spect  
PROBHD Z108618\_0945 (Z108618\_0945)  
PULPROG zg30  
TD 65536  
SOLVENT DMSO  
NS 16  
DS 2  
SWH 8012.820 Hz  
FIDRES 0.244532 Hz  
AQ 4.0894465 sec  
RG 88.92  
DW 62.400 usec  
DE 6.50 usec  
TE 294.8 K  
D1 1.00000000 sec  
TD0 1  
SFO1 400.2024712 MHz  
NUC1 1H  
P1 13.50 usec  
PLW1 13.00000000 W

F2 - Processing parameters  
SI 65536  
SF 400.2000000 MHz  
WDW EM  
SSB 0  
LB 0.30 Hz  
GB 0  
PC 1.00

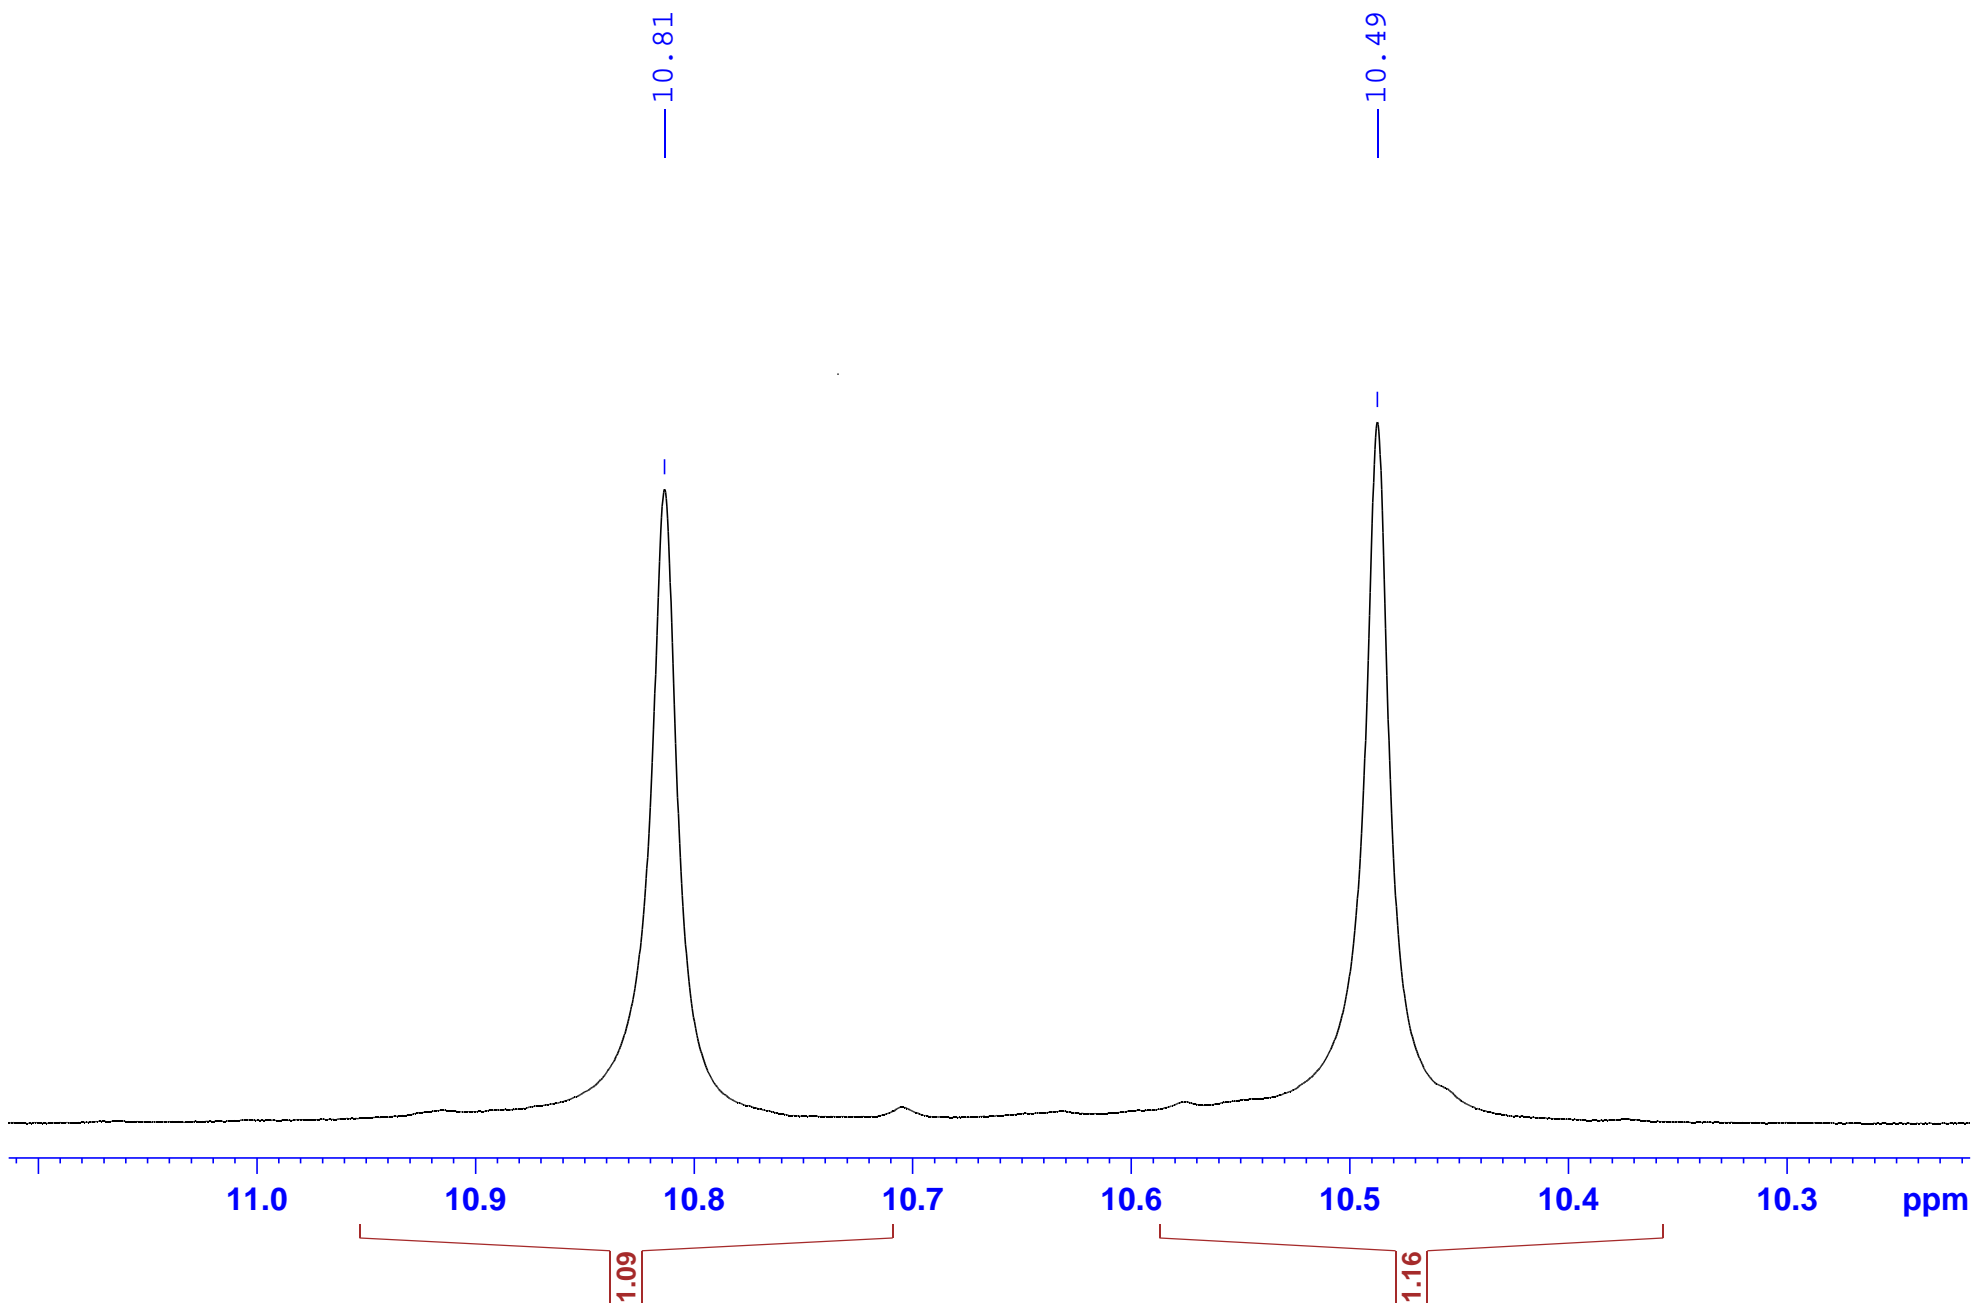

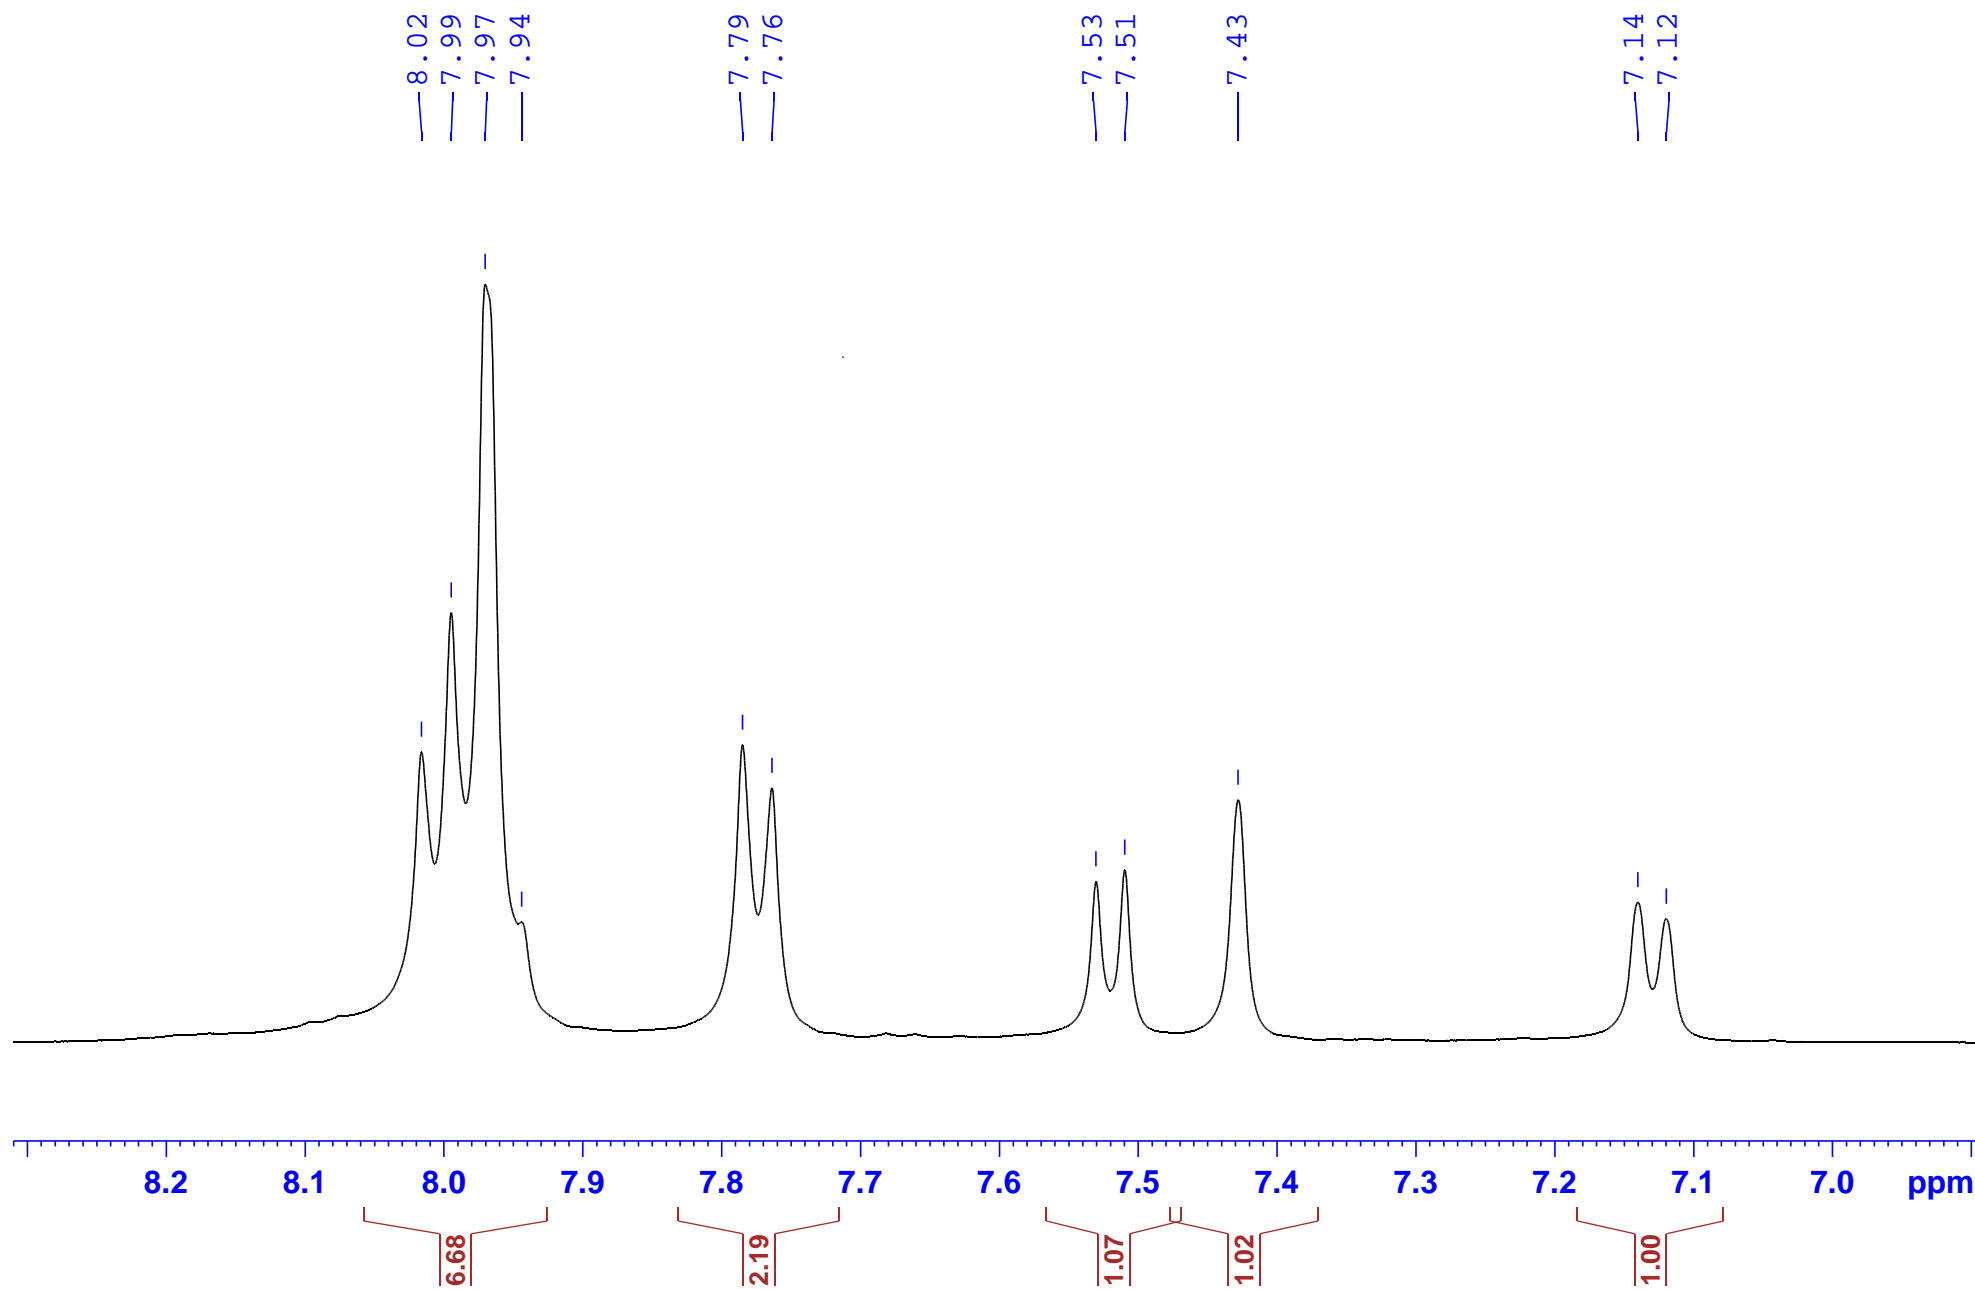

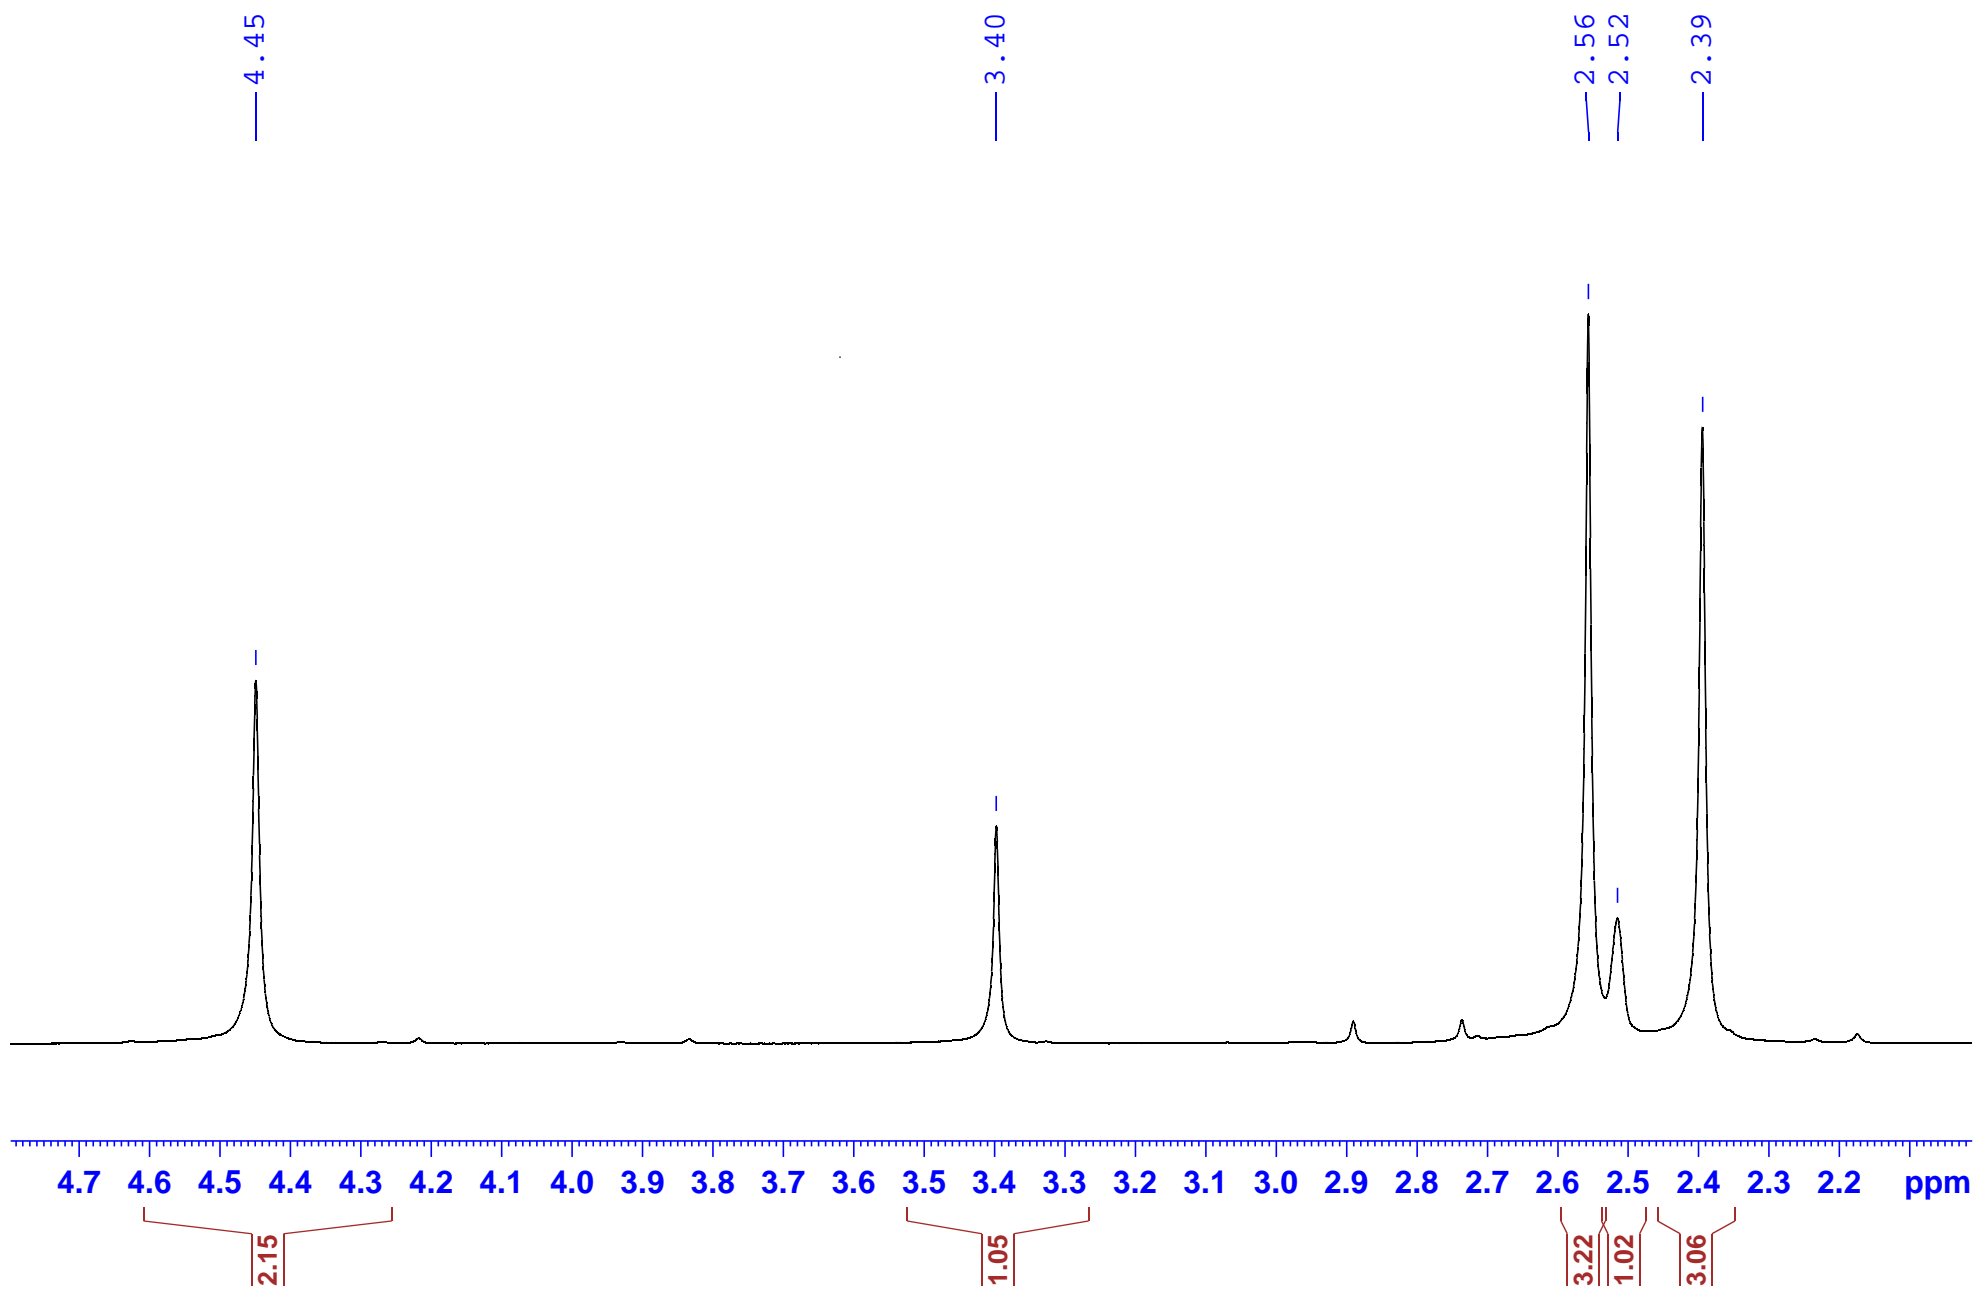



### <sup>13</sup>C NMR of compound 8h

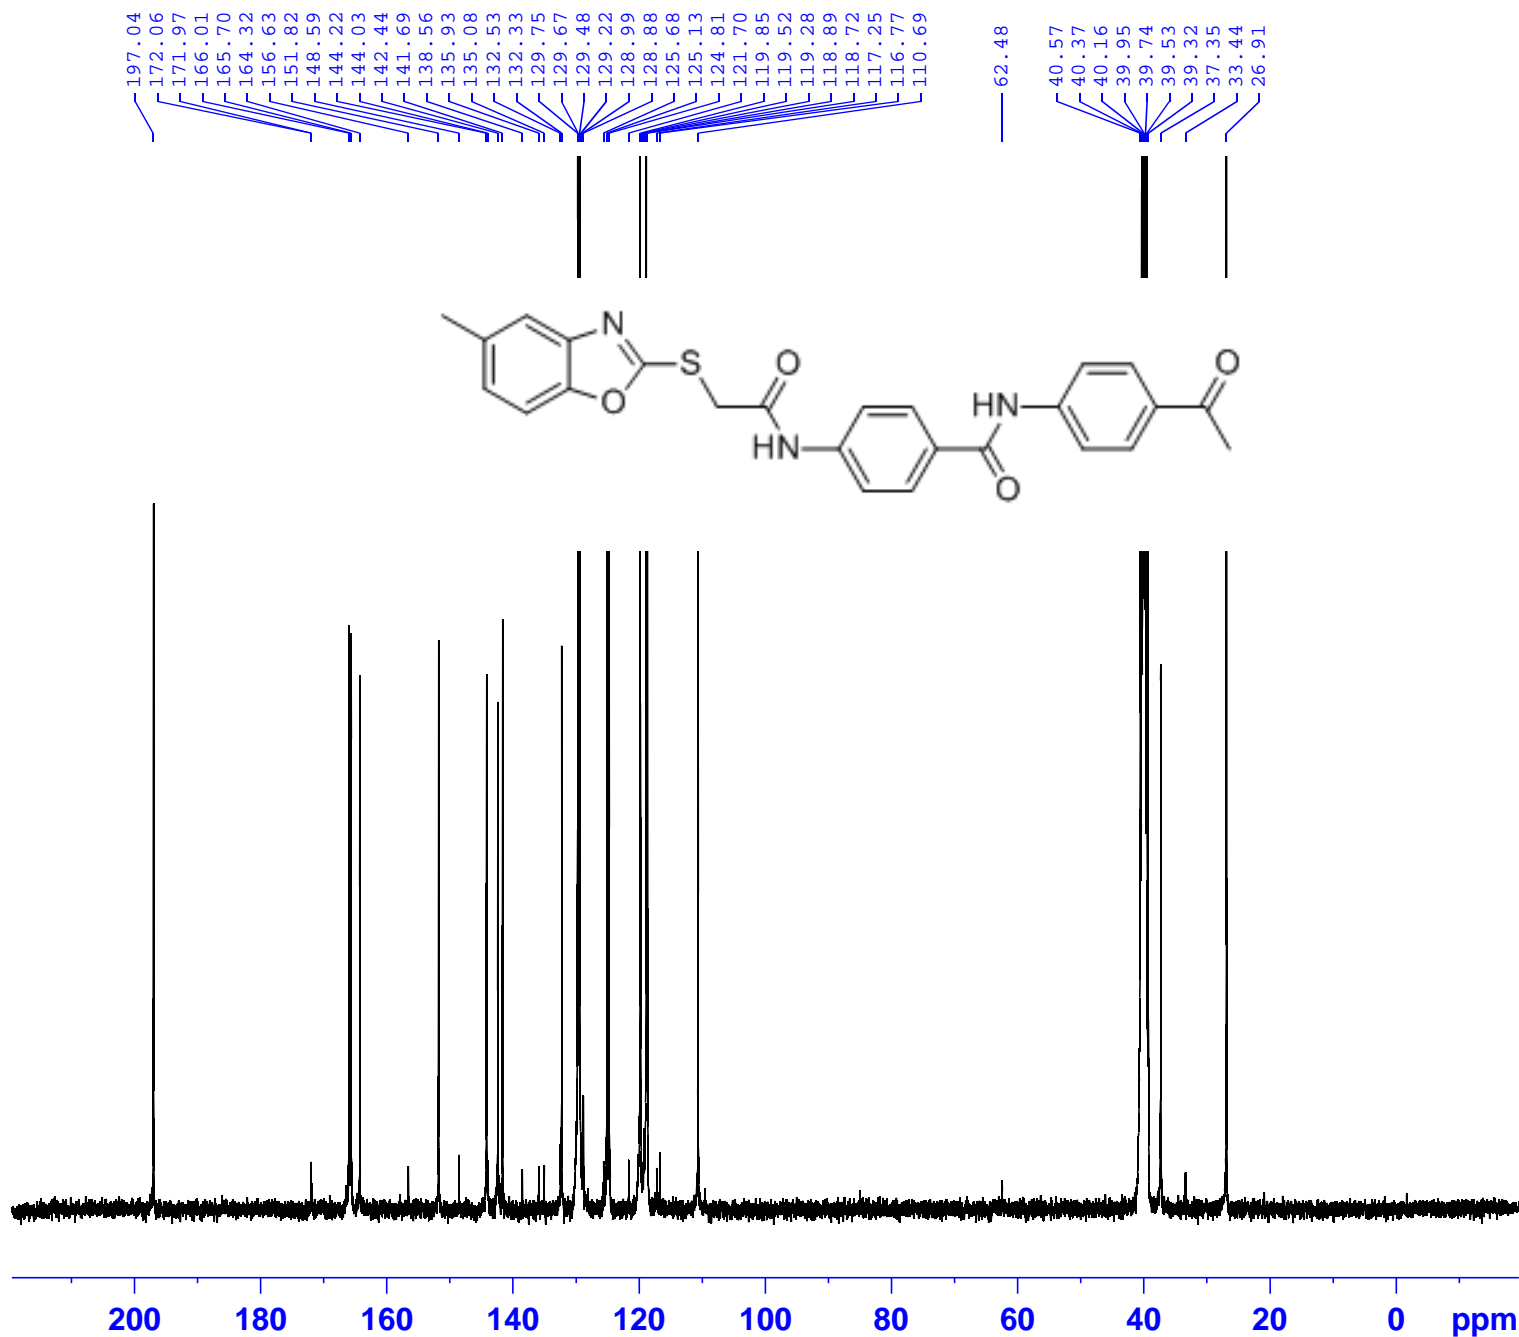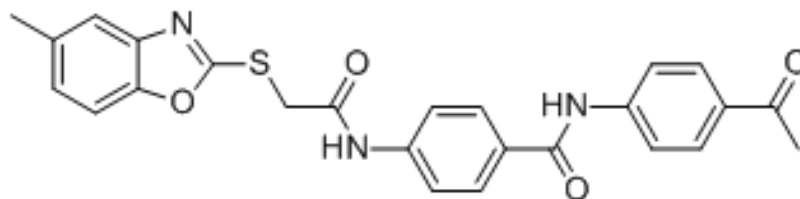

```
Current Data Parameters
NAME      IbrahimEisa-MBA-7-C13NMR-Em
EXPNO          10
PROCNO         1
```

## F2 - Acquisition Parameters

Date\_ 20220113

```

Date_      20220113
Time              1.33 h

```

INSTRUM spect

PROBHD Z108618\_0945 (

PULPROG zgpg30

|    |       |
|----|-------|
| TD | 65536 |
|----|-------|

| SOLVENT | DMSO  |
|---------|-------|
| 100     | 0.000 |

|    |      |
|----|------|
| NS | 2200 |
| DS | 4    |

|     |             |
|-----|-------------|
| DS  | 4           |
| SWH | 24038 461 H |

|        |           |   |
|--------|-----------|---|
| SWH    | 24038.461 | H |
| FIDRES | 0.733506  | H |

|        |           |   |
|--------|-----------|---|
| FIDRES | 0.733596  | H |
| AO     | 1.3631488 | S |

|    |           |    |
|----|-----------|----|
| AQ | 1.3631488 | se |
| PG | 197.77    |    |

|    |            |
|----|------------|
| RG | 197.77     |
| DW | 20.800 118 |

|    |        |    |
|----|--------|----|
| DW | 20.800 | us |
| DE | 6.50   | us |

TE 0 K

D1 2.000000000 se

|     |             |    |
|-----|-------------|----|
| D1  | 2.000000000 | se |
| D11 | 0.030000000 | se |

```

D11      0.050000000  SC
TD0      1

```

SFO1 100.6404331 MHz

NUC1 13C

P1 10.00 us

```
PLW1      47.00000000 W
```

SFO2 400.2016008 ME

NUC2 1H

CPDPRG[2                      waltz16

PCPD2 90.00 us

|      |              |   |
|------|--------------|---|
| PLW2 | 13.000000000 | W |
|------|--------------|---|

|       |            |   |
|-------|------------|---|
| PLW12 | 0.29249999 | W |
|-------|------------|---|

PLW13                    0.14713000 W

## F2 - Processing parameters

SI 32768

SF 100.6303700 ME

WDW EM

SSB 0

LB 1.00 Hz

GB 0

|    |      |
|----|------|
| PC | 1.40 |
|----|------|

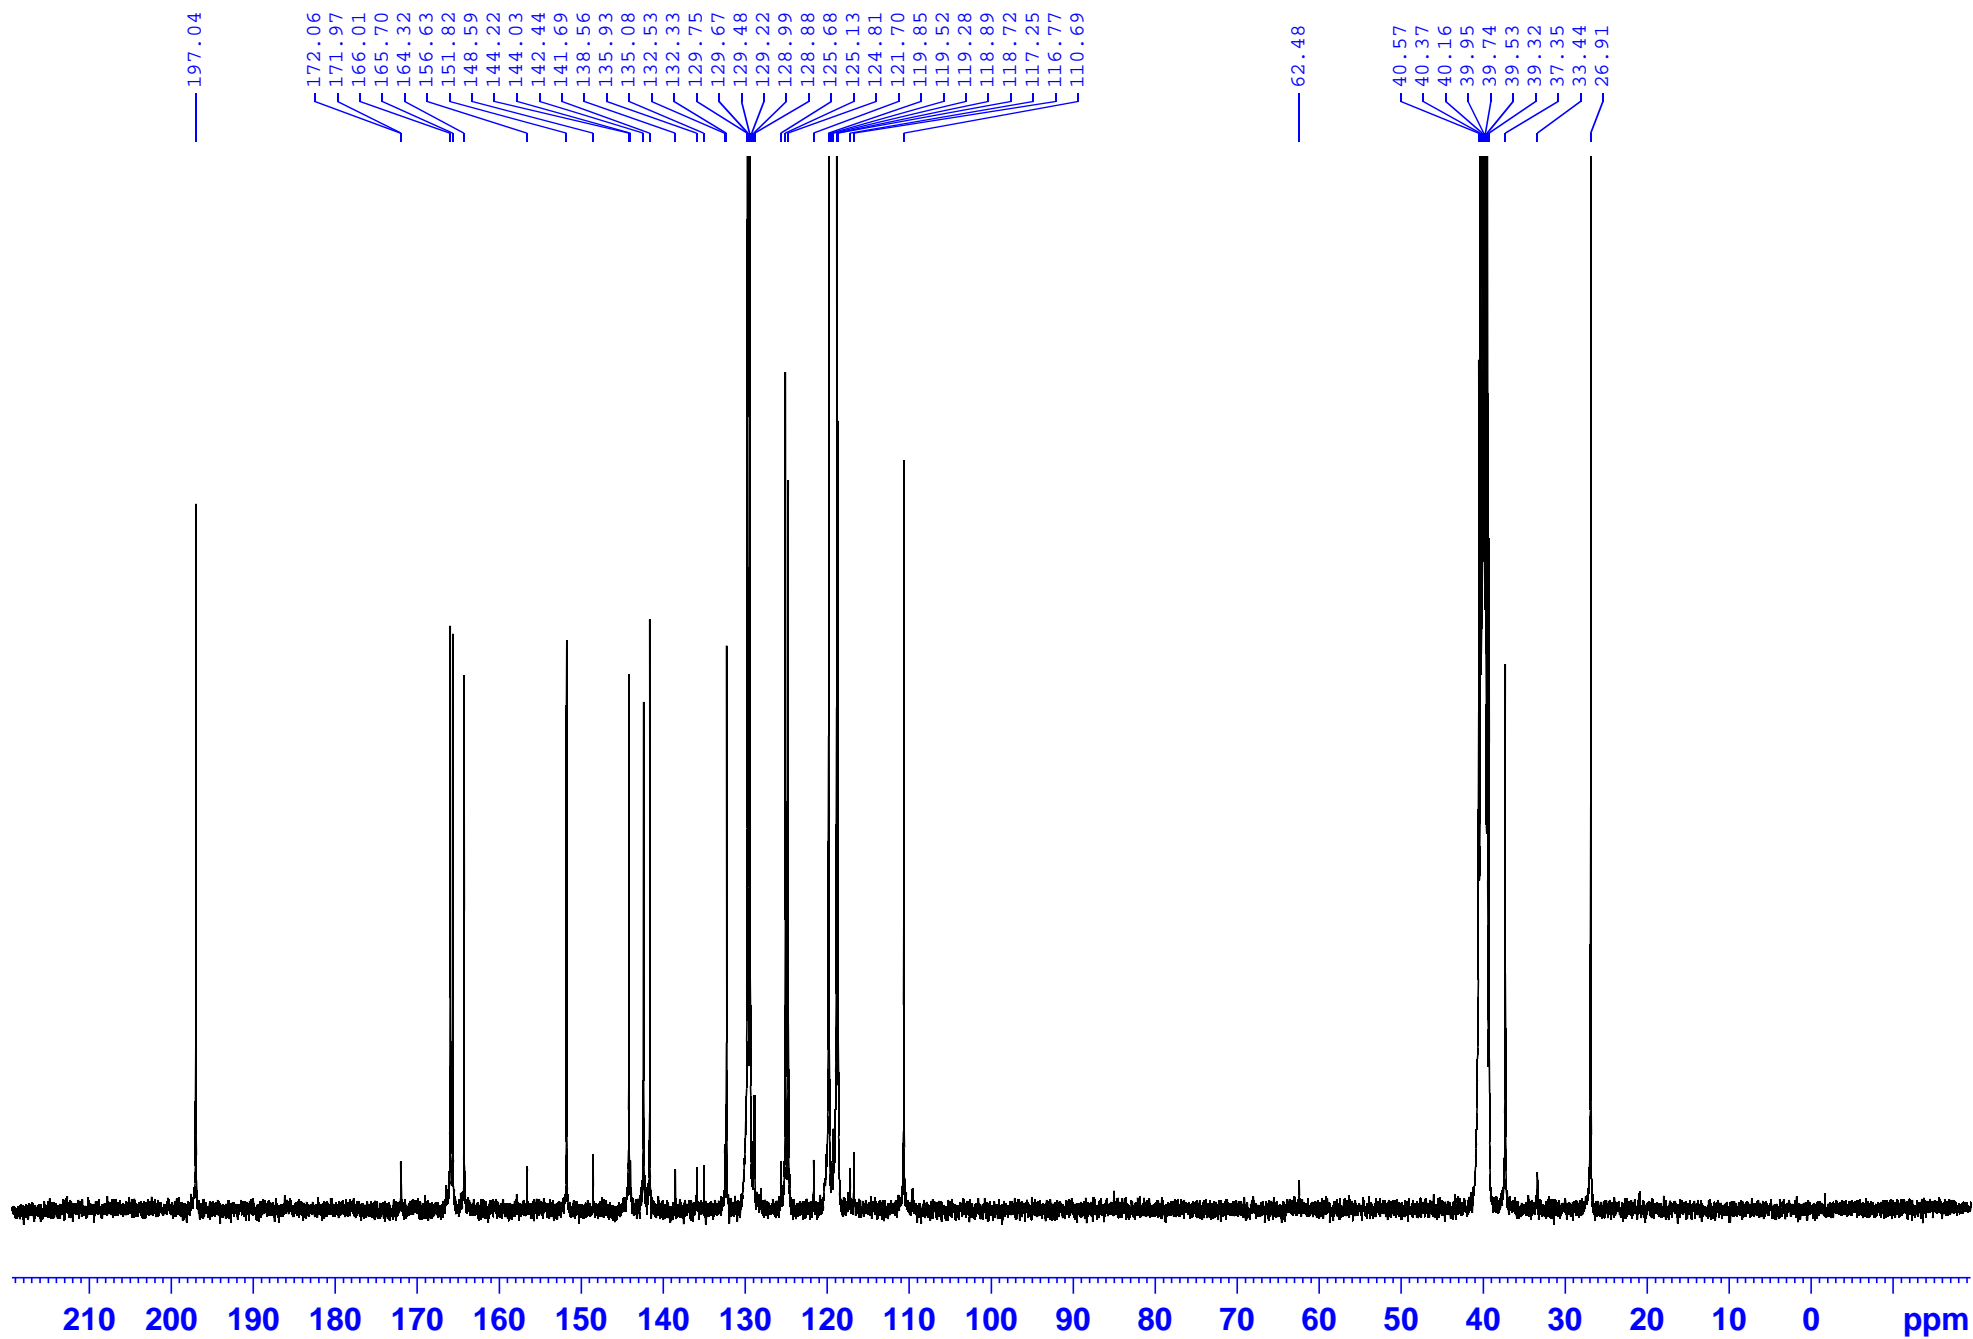

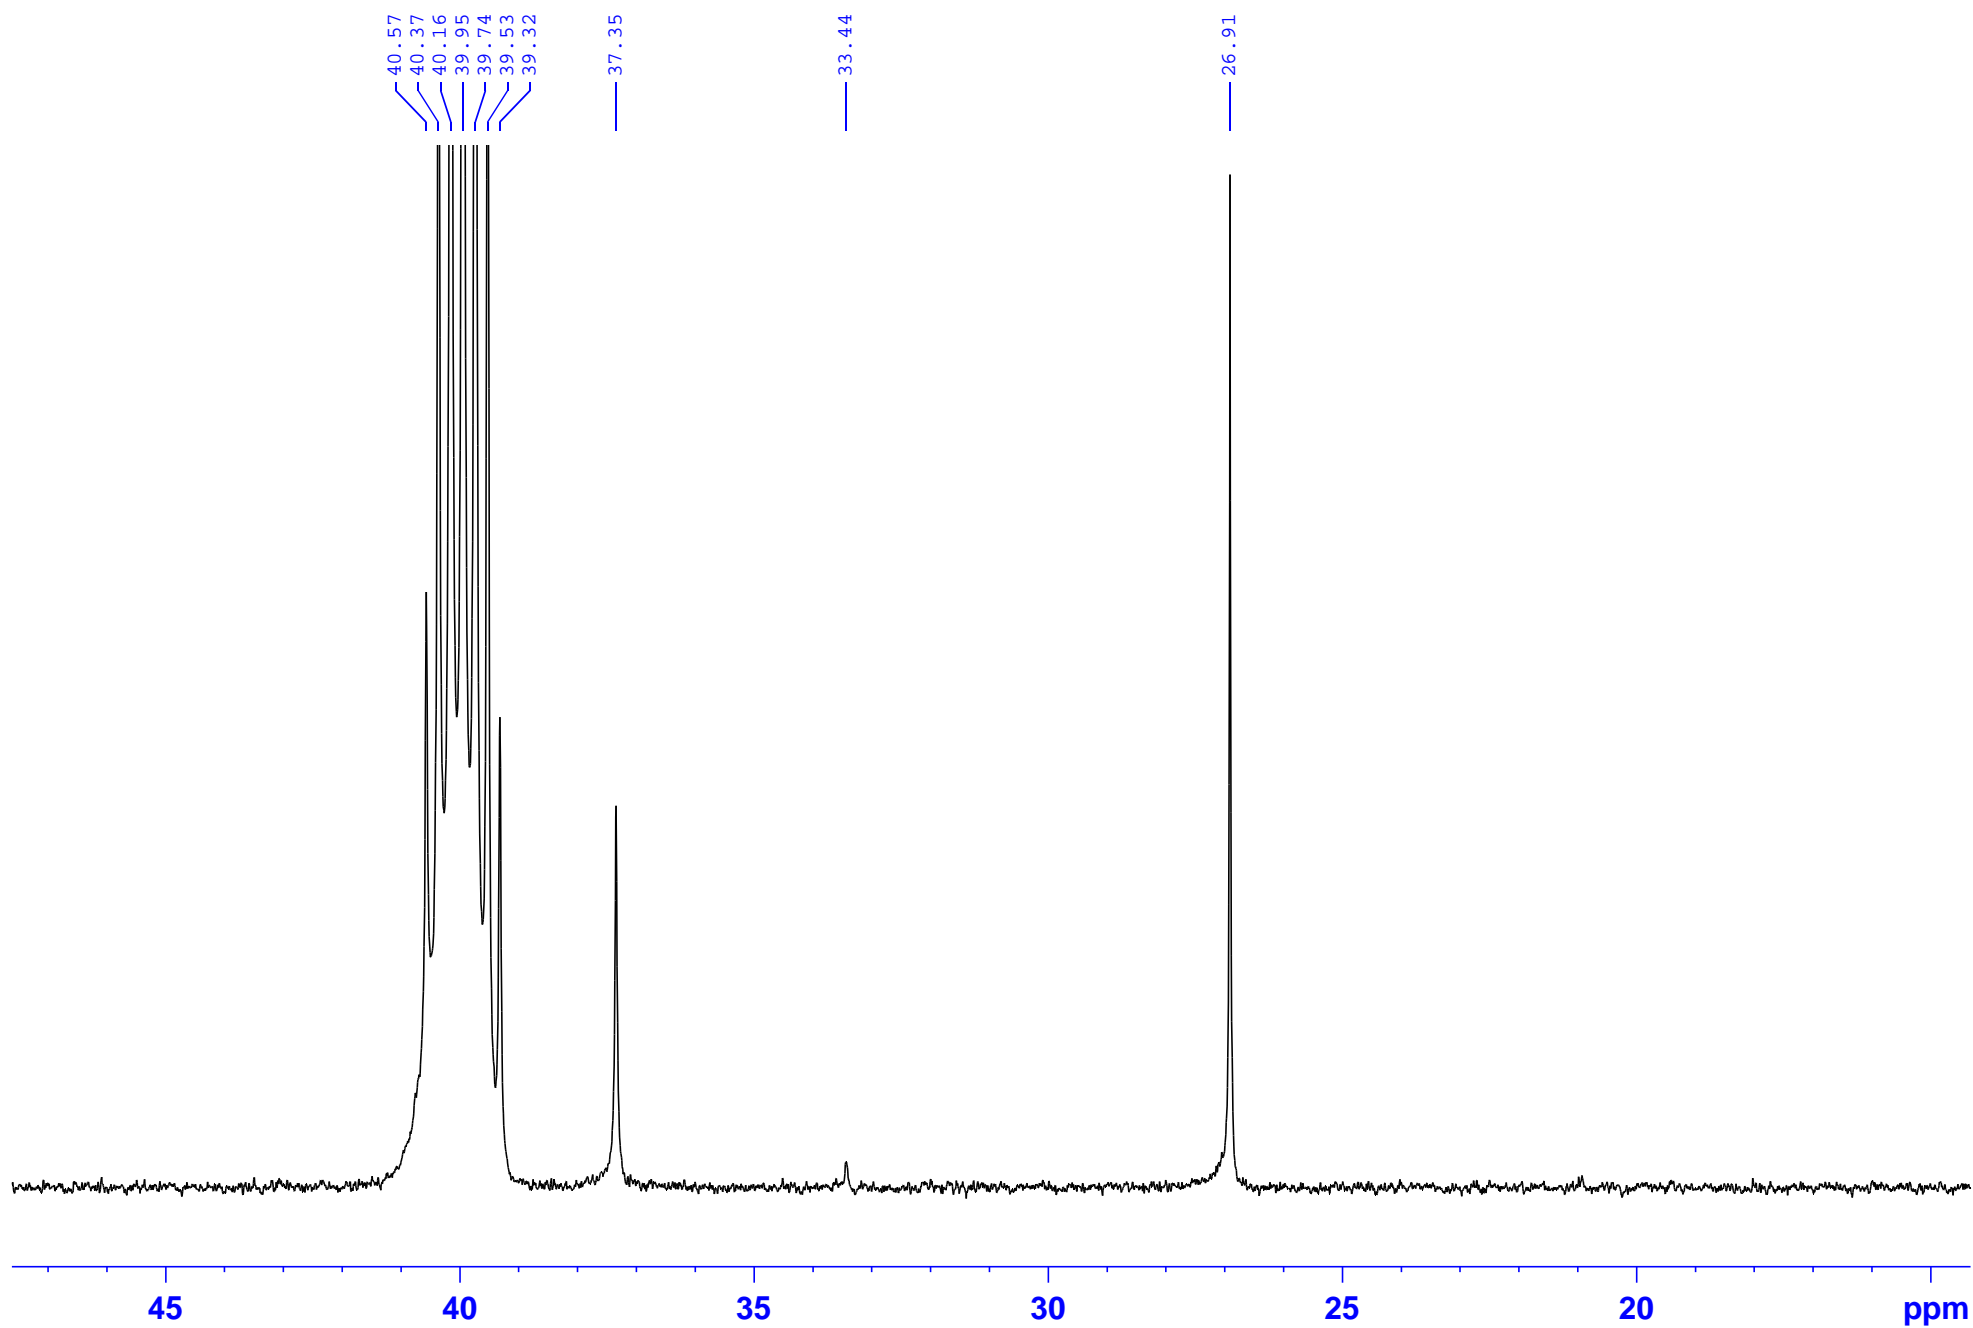

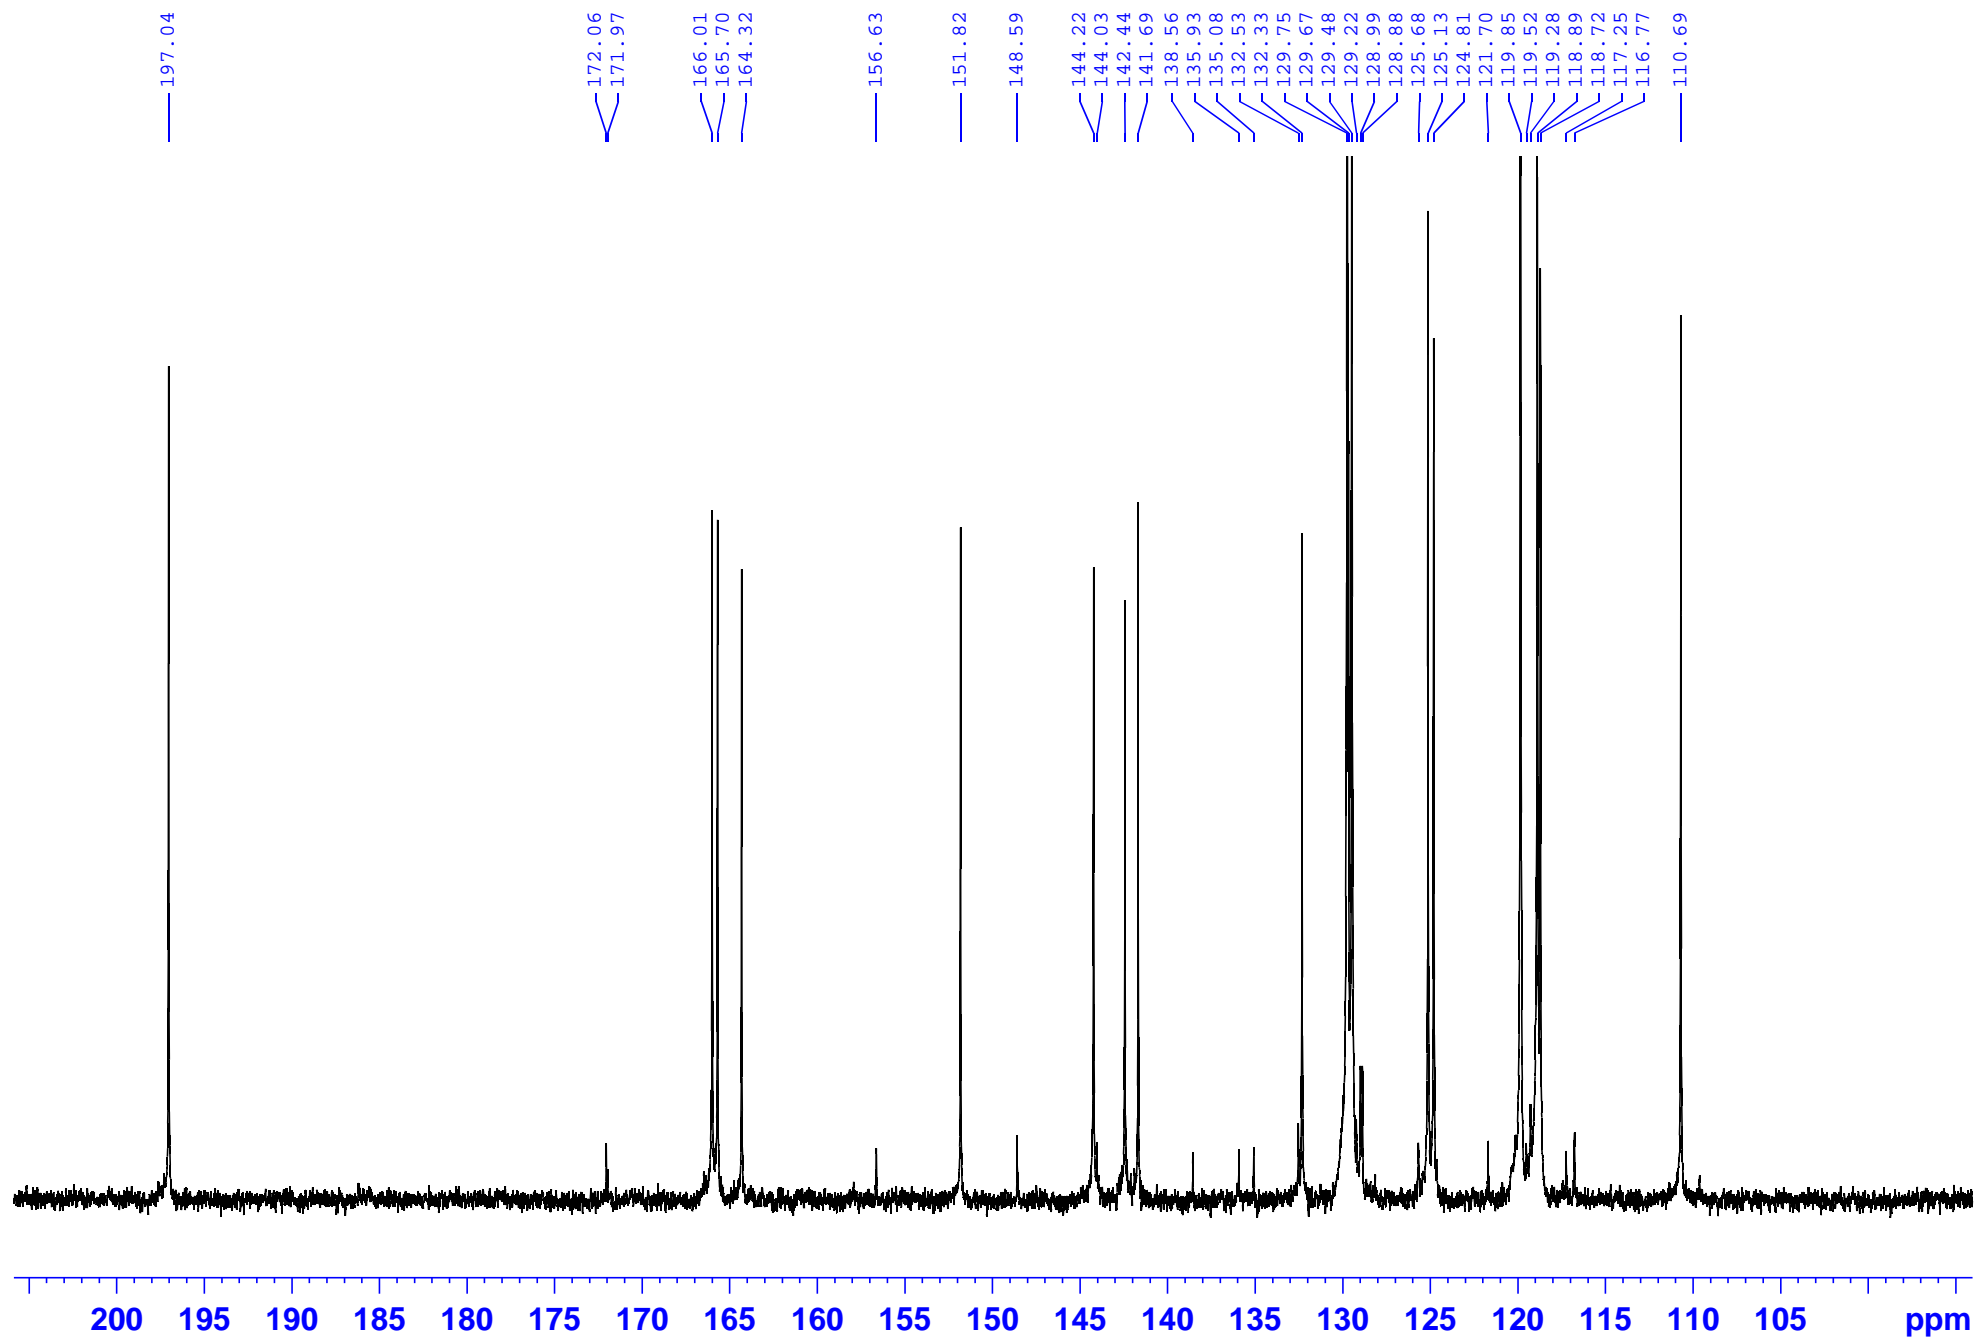

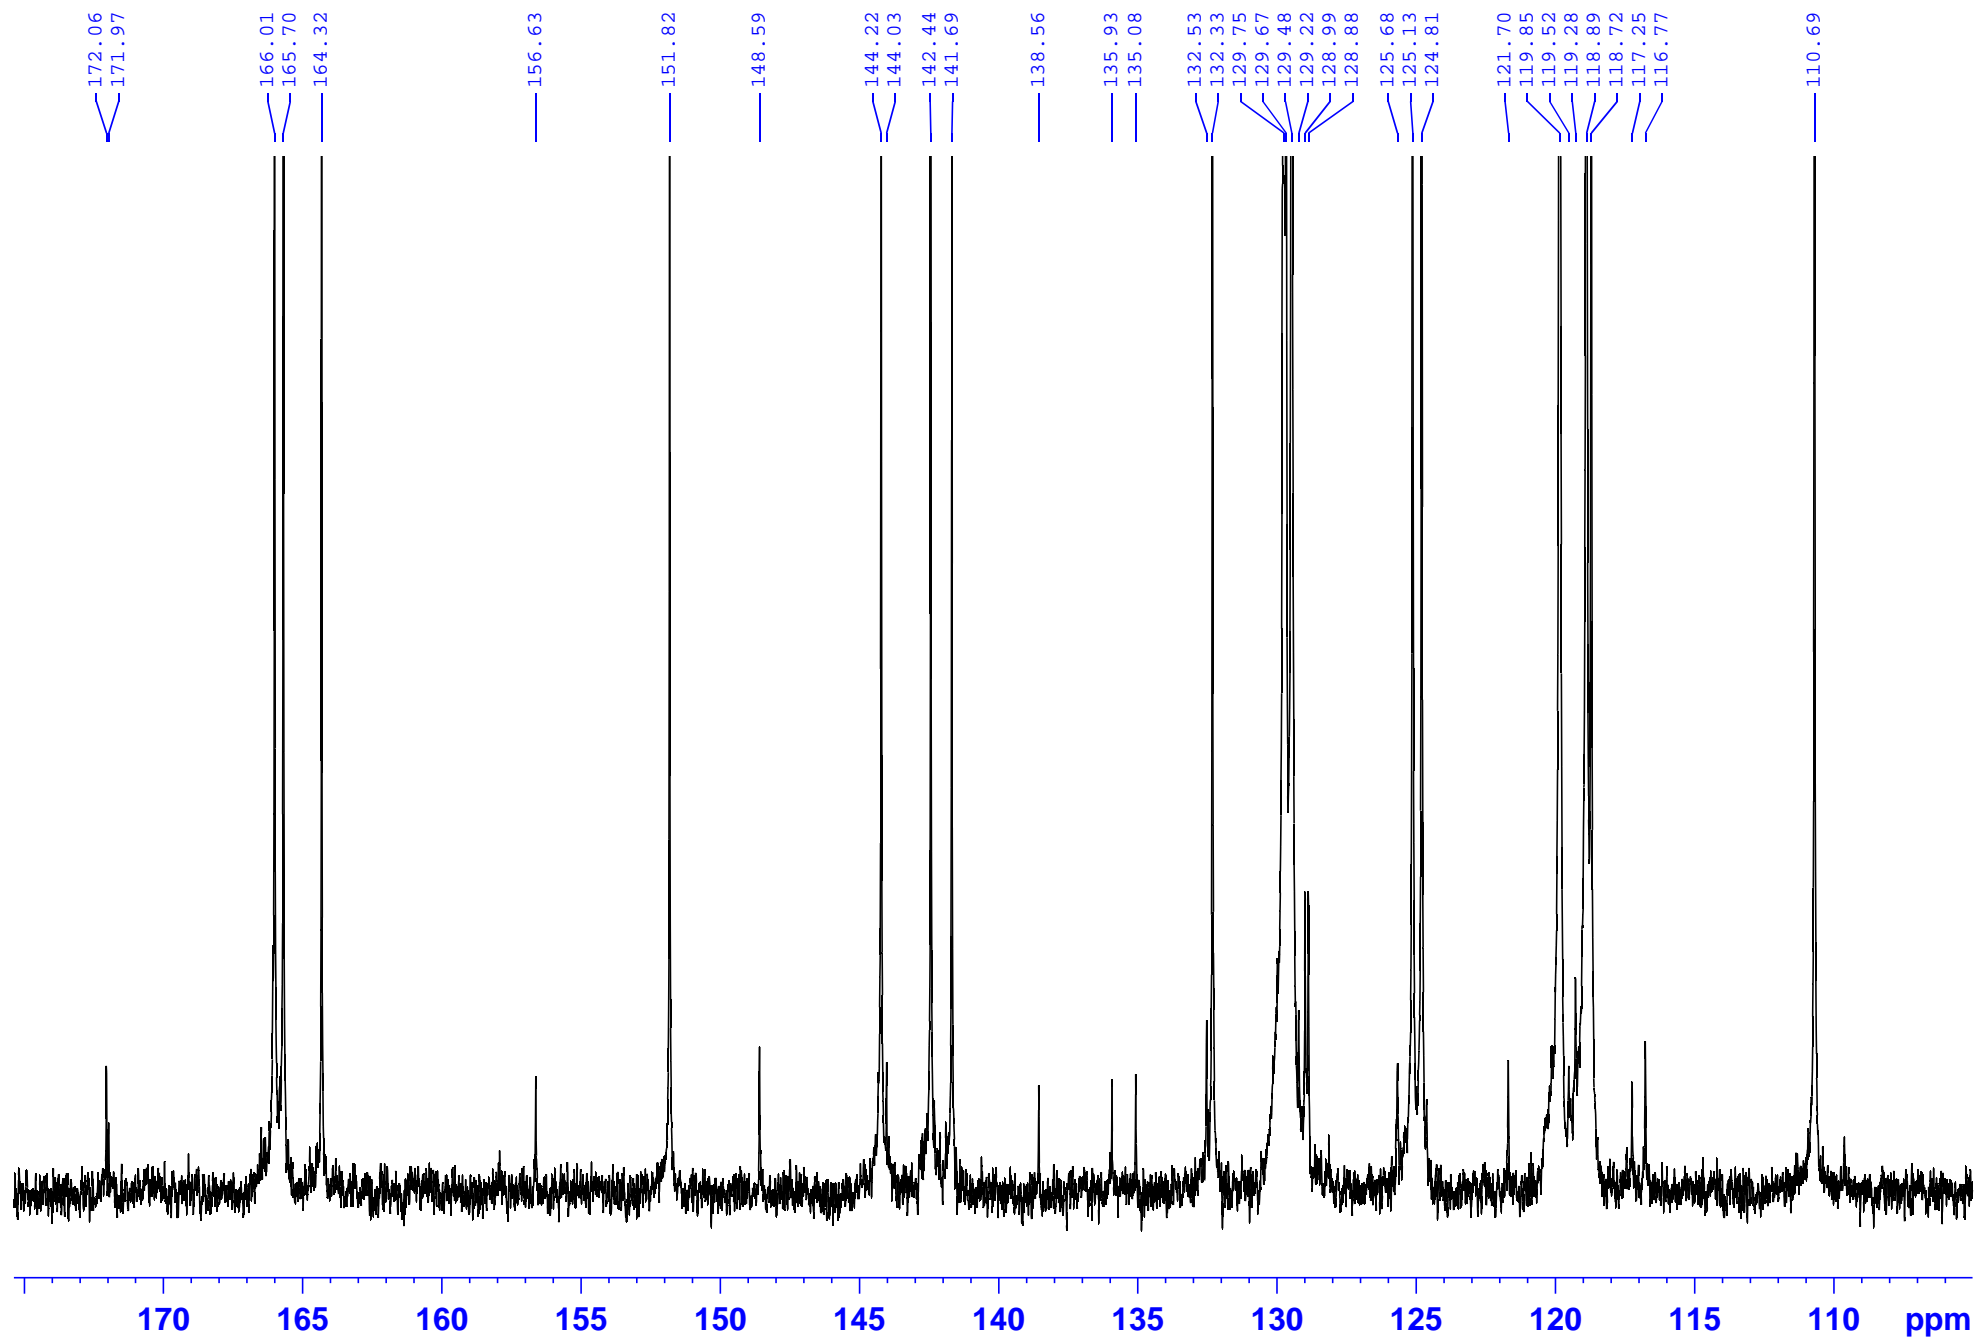

# Cairo University Micro Analytical Center

DI Analysis  
Shimadzu Qp-2010 Plus

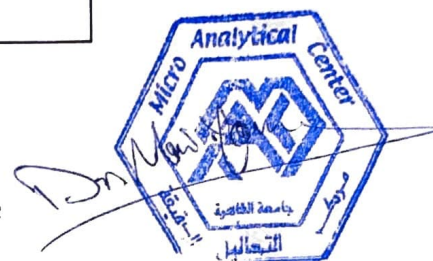

## Sample Information

Analyzed by : Dr. Mai Younis  
 Analyzed : 01/01/2007 09:19:13  
 Sample Name : 7  
 Sample ID :  
 Customer Name : Dr. Radwan Saeed - Pharmacy - Helwan  
 Data File : C:\GCMSsolution\Data\Project1\7.QGD  
 Org Data File : C:\GCMSsolution\Data\Project1\7.QGD  
 Method File : C:\GCMSsolution\Data\Project1\High Temperature Op  
 Org Method File : C:\GCMSsolution\Data\Project1\High Temperature Op  
 Report File :  
 Tuning File : C:\GCMSsolution\System\Tune1\\_default.qgt  
 \$EndIf\$Modified by : Dr. Mai Younis  
 Modified : 01/01/2007 09:23:47

## Method

Analytical Line 1  
 IonSourceTemp : 250.00 °C  
 [MS Table]  
 --Group 1 - Event 1--  
 Start Time : 0.00min  
 End Time : 10.00min  
 ACQ Mode : Scan  
 Event Time : 0.50sec  
 Scan Speed : 1250  
 Start m/z : 50.00  
 End m/z : 600.00

Electron Voltage : 70 eV  
 Ionization Mode : EI

C:\GCMSsolution\Data\Project1\7.QGD

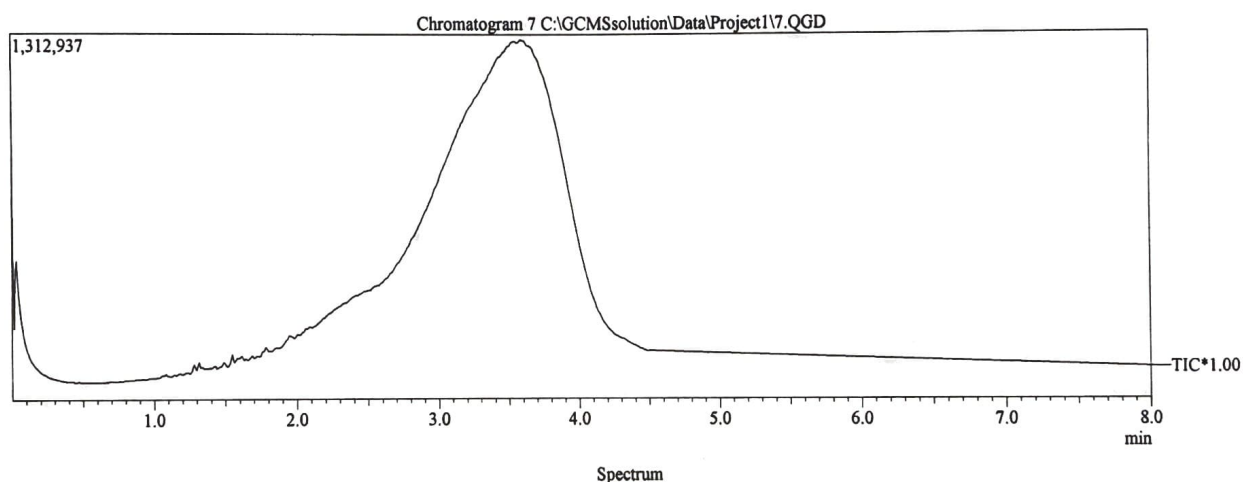

Line#:1 R.Time:3.6(Scan#:437)  
 MassPeaks:228  
 RawMode:Single 3.6(437) BasePeak:120(192245)  
 BG Mode:None Group 1 - Event 1

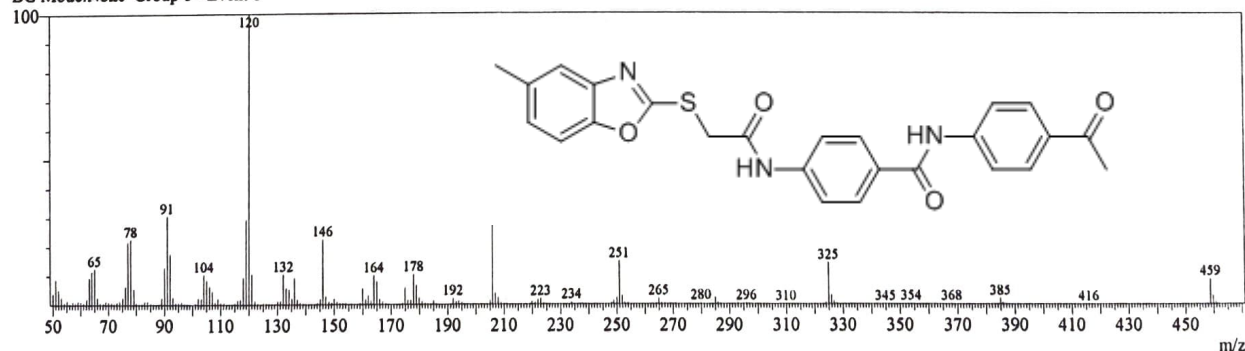

## Mass Table

Line#:1 R.Time:3.6(Scan#:437)

MassPeaks:228

RawMode:Single 3.6(437) BasePeak:120(192245)

BG Mode:None Group 1 - Event 1

| # | m/z   | Abs. In | Rel. Int. | # | m/z   | Abs. In | Rel. Int. | # | m/z   | Abs. In | Rel. Int. |
|---|-------|---------|-----------|---|-------|---------|-----------|---|-------|---------|-----------|
| 1 | 50.05 | 7427    | 3.86      | 4 | 53.00 | 4930    | 2.56      | 7 | 56.05 | 961     | 0.50      |
| 2 | 51.00 | 16862   | 8.77      | 5 | 54.05 | 1463    | 0.76      | 8 | 57.05 | 2195    | 1.14      |
| 3 | 52.00 | 9865    | 5.13      | 6 | 55.05 | 2712    | 1.41      | 9 | 58.00 | 1278    | 0.66      |

# IR of compound 8i

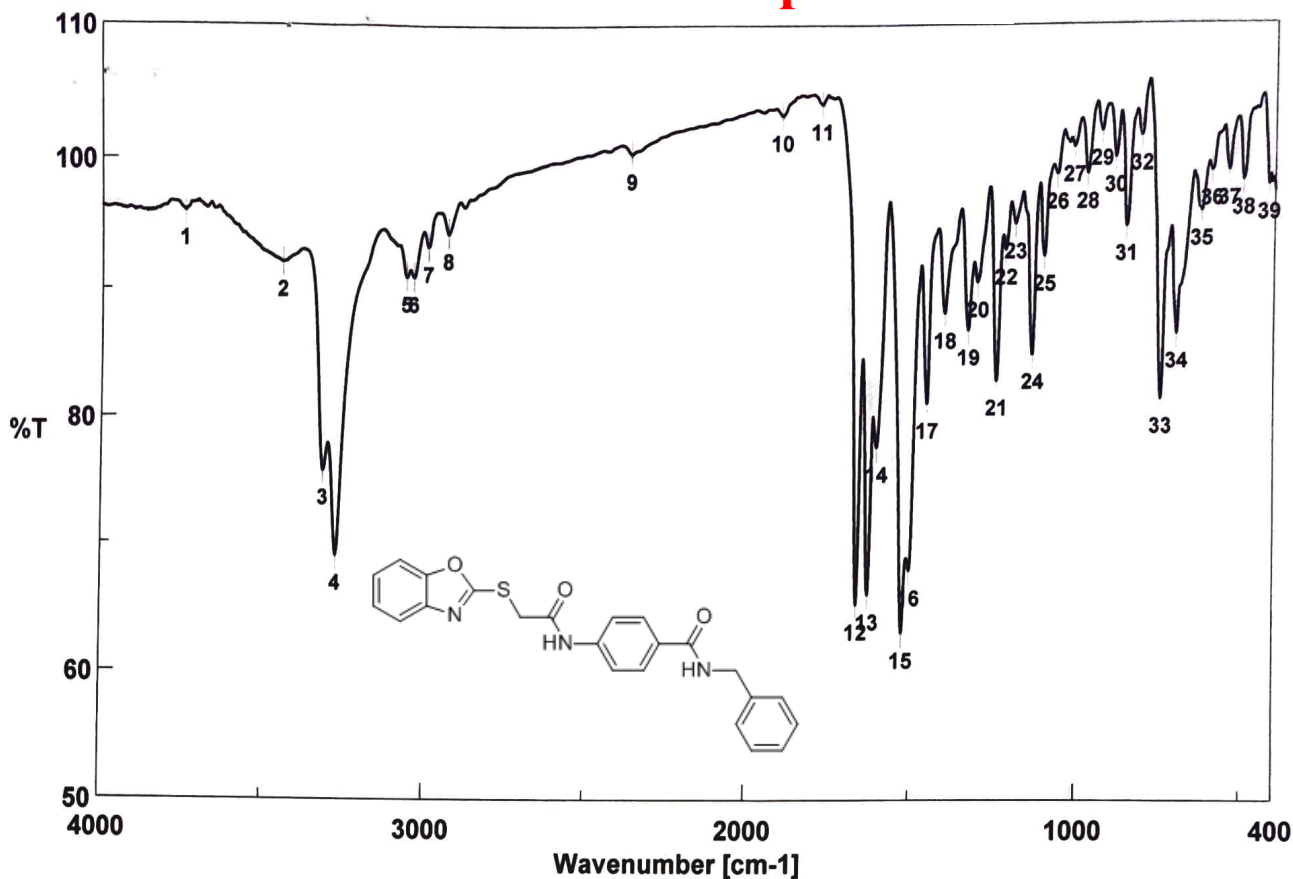

Accumulation 16  
 Resolution 4 cm-1  
 Zero Filling ON  
 Apodization Cosine  
 Gain Auto (2)  
 Scanning Speed Auto (2 mm/sec)  
 Date/Time 8/22/2021 1:57PM  
 Update 8/22/2021 1:58PM  
 Operator IR  
 File Name Memory#107  
 Sample Name PBA -11  
 Comment

| No. | cm-1    | %T      | No. | cm-1    | %T      | No. | cm-1    | %T      |
|-----|---------|---------|-----|---------|---------|-----|---------|---------|
| 1   | 3741.23 | 95.9872 | 2   | 3438.46 | 92.0036 | 3   | 3309.25 | 75.6188 |
| 4   | 3269.72 | 68.9627 | 5   | 3055.66 | 90.684  | 6   | 3032.51 | 90.6725 |
| 7   | 2988.16 | 92.9933 | 8   | 2927.41 | 94.0196 | 9   | 2361.41 | 100.229 |
| 10  | 1898.58 | 103.113 | 11  | 1777.08 | 103.989 | 12  | 1663.3  | 65.0773 |
| 13  | 1629.55 | 65.8723 | 14  | 1604.48 | 77.3178 | 15  | 1525.42 | 62.9047 |
| 16  | 1504.2  | 67.7285 | 17  | 1452.14 | 80.7534 | 18  | 1398.14 | 87.8128 |
| 19  | 1326.79 | 86.5055 | 20  | 1298.82 | 90.2316 | 21  | 1241.93 | 82.5605 |
| 22  | 1213.97 | 92.7693 | 23  | 1185.04 | 94.7916 | 24  | 1132.01 | 84.6488 |
| 25  | 1097.3  | 92.2998 | 26  | 1059.69 | 98.6393 | 27  | 1008.59 | 100.705 |
| 28  | 967.126 | 98.6414 | 29  | 925.664 | 101.931 | 30  | 883.238 | 99.9124 |
| 31  | 847.561 | 94.6247 | 32  | 804.171 | 101.538 | 33  | 742.46  | 81.2419 |
| 34  | 693.284 | 86.3378 | 35  | 620.966 | 95.769  | 36  | 591.075 | 98.8195 |
| 37  | 539.007 | 98.8521 | 38  | 495.616 | 98.1091 | 39  | 419.442 | 97.7309 |

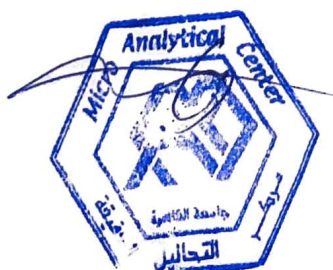

Handwritten signature in blue ink.

# <sup>1</sup>H NMR of compound 8i

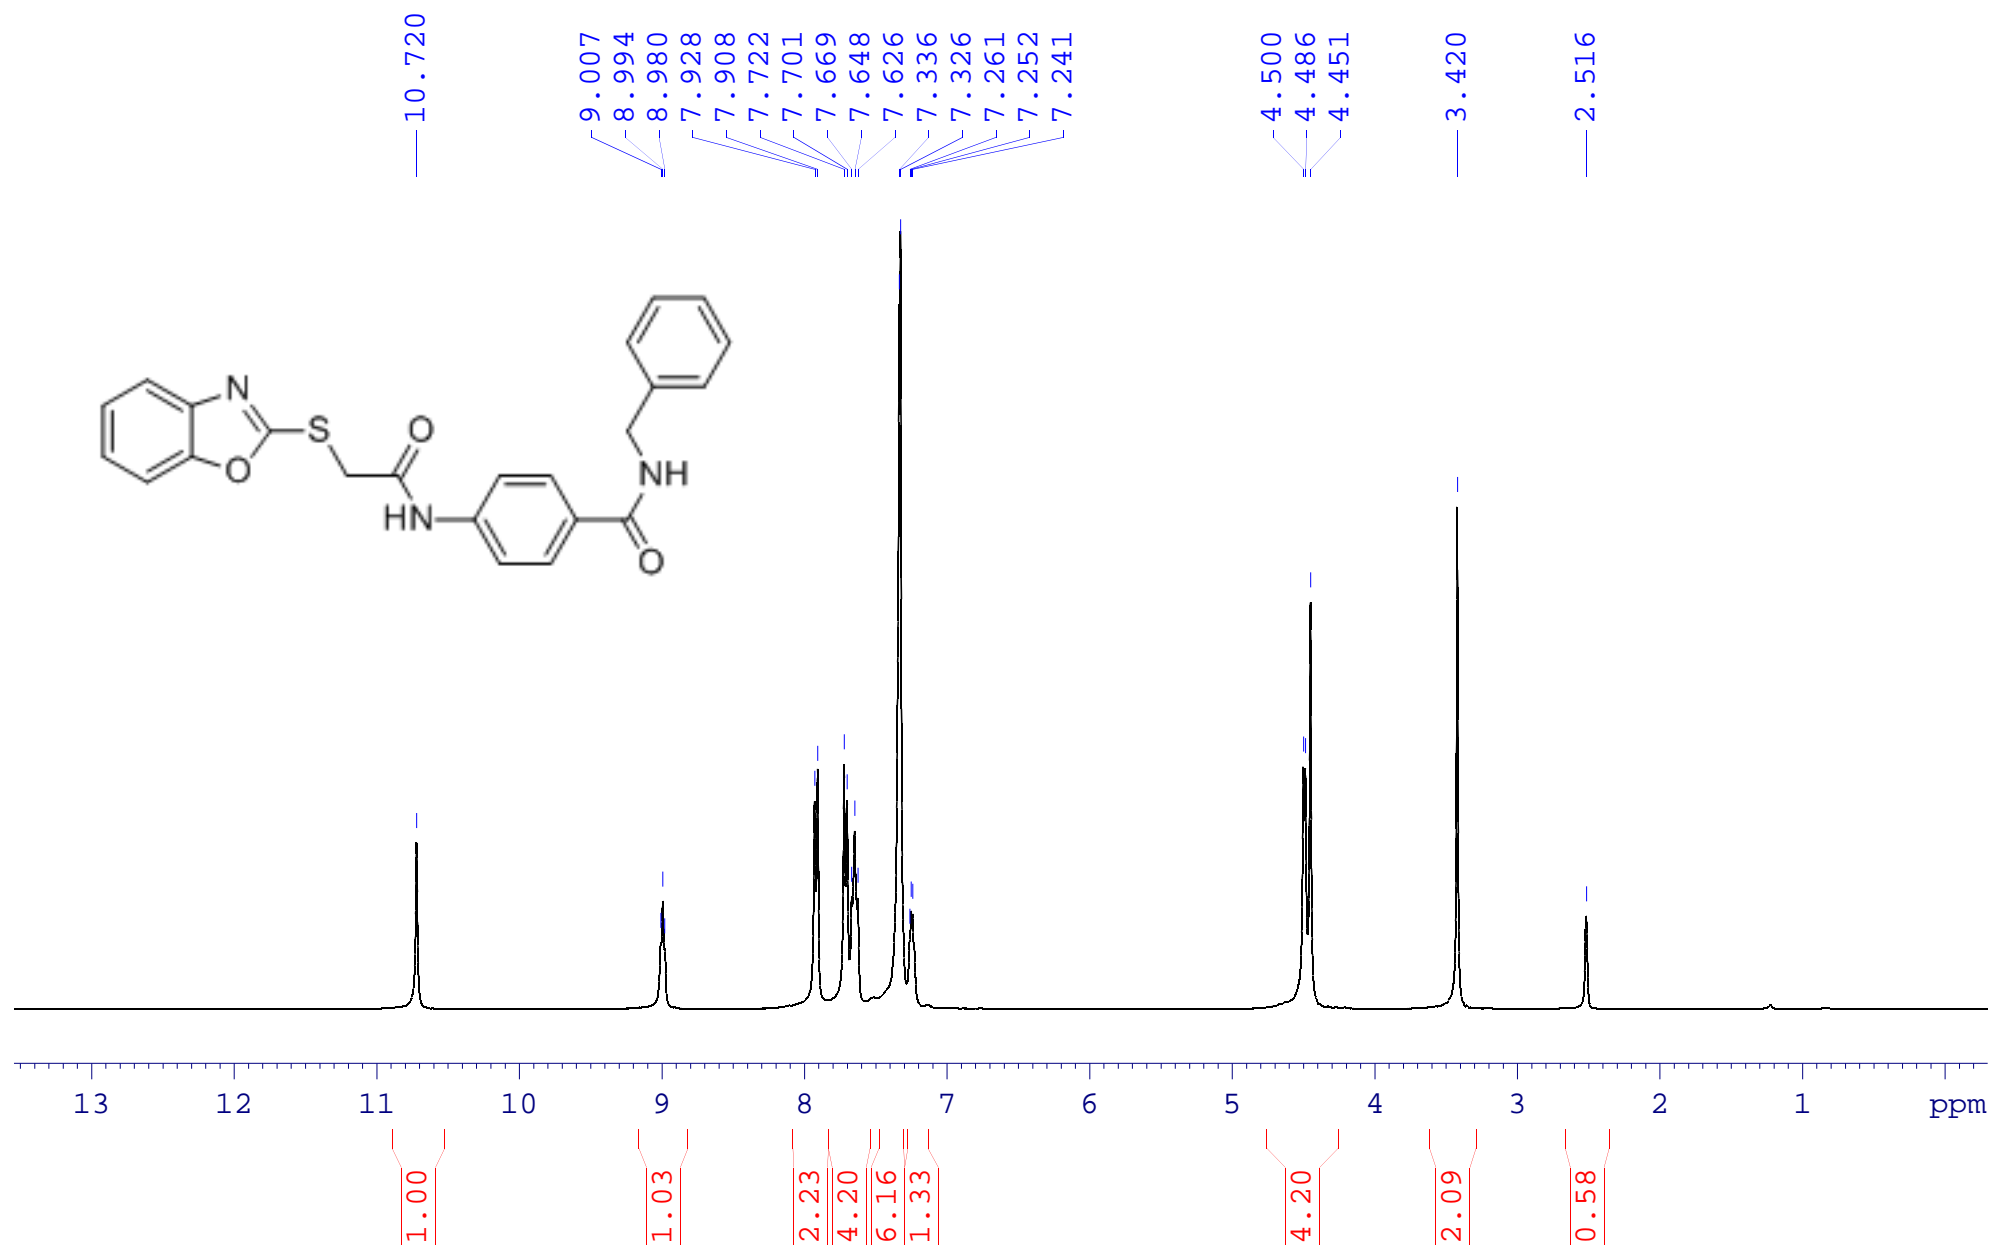



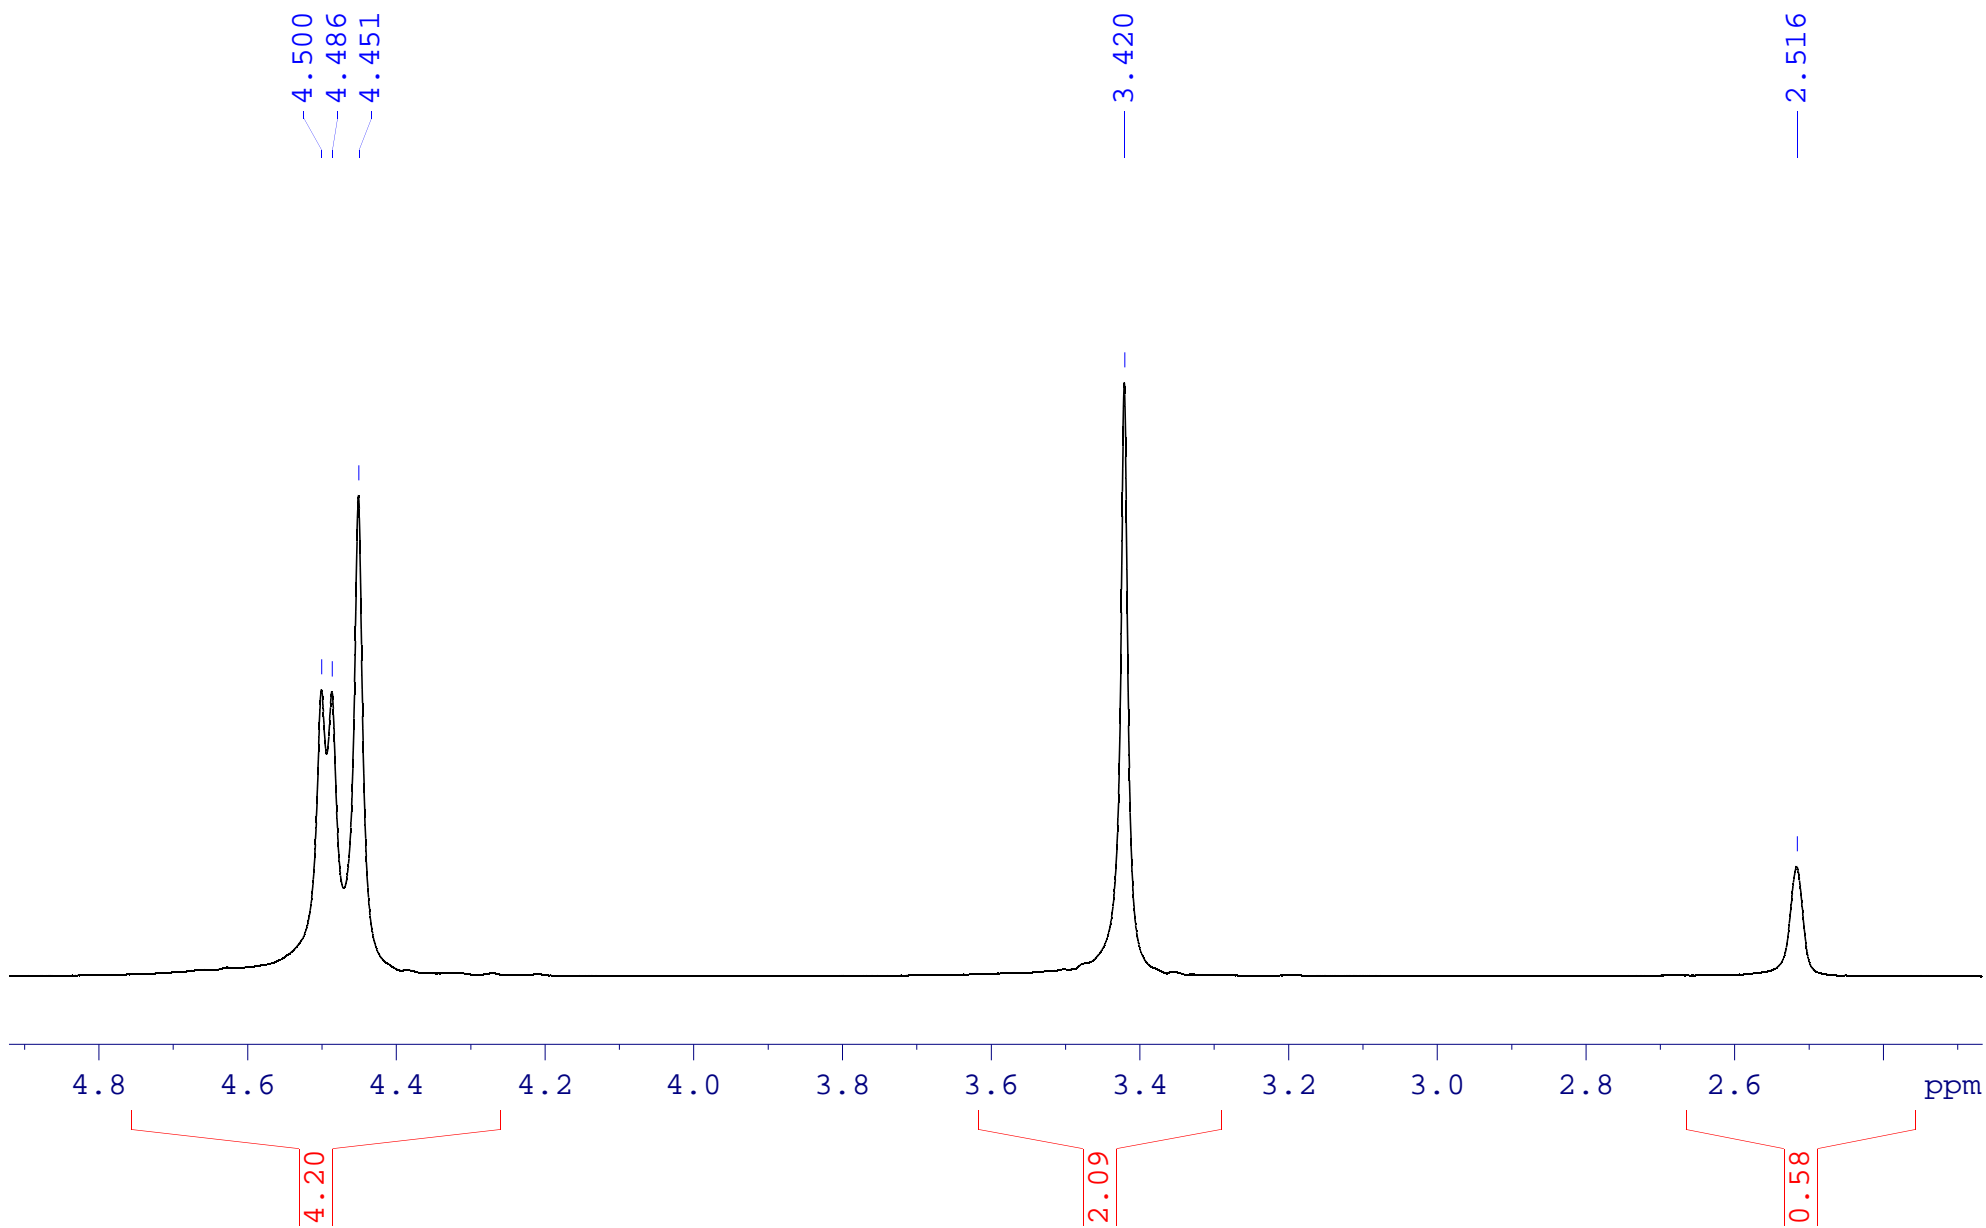

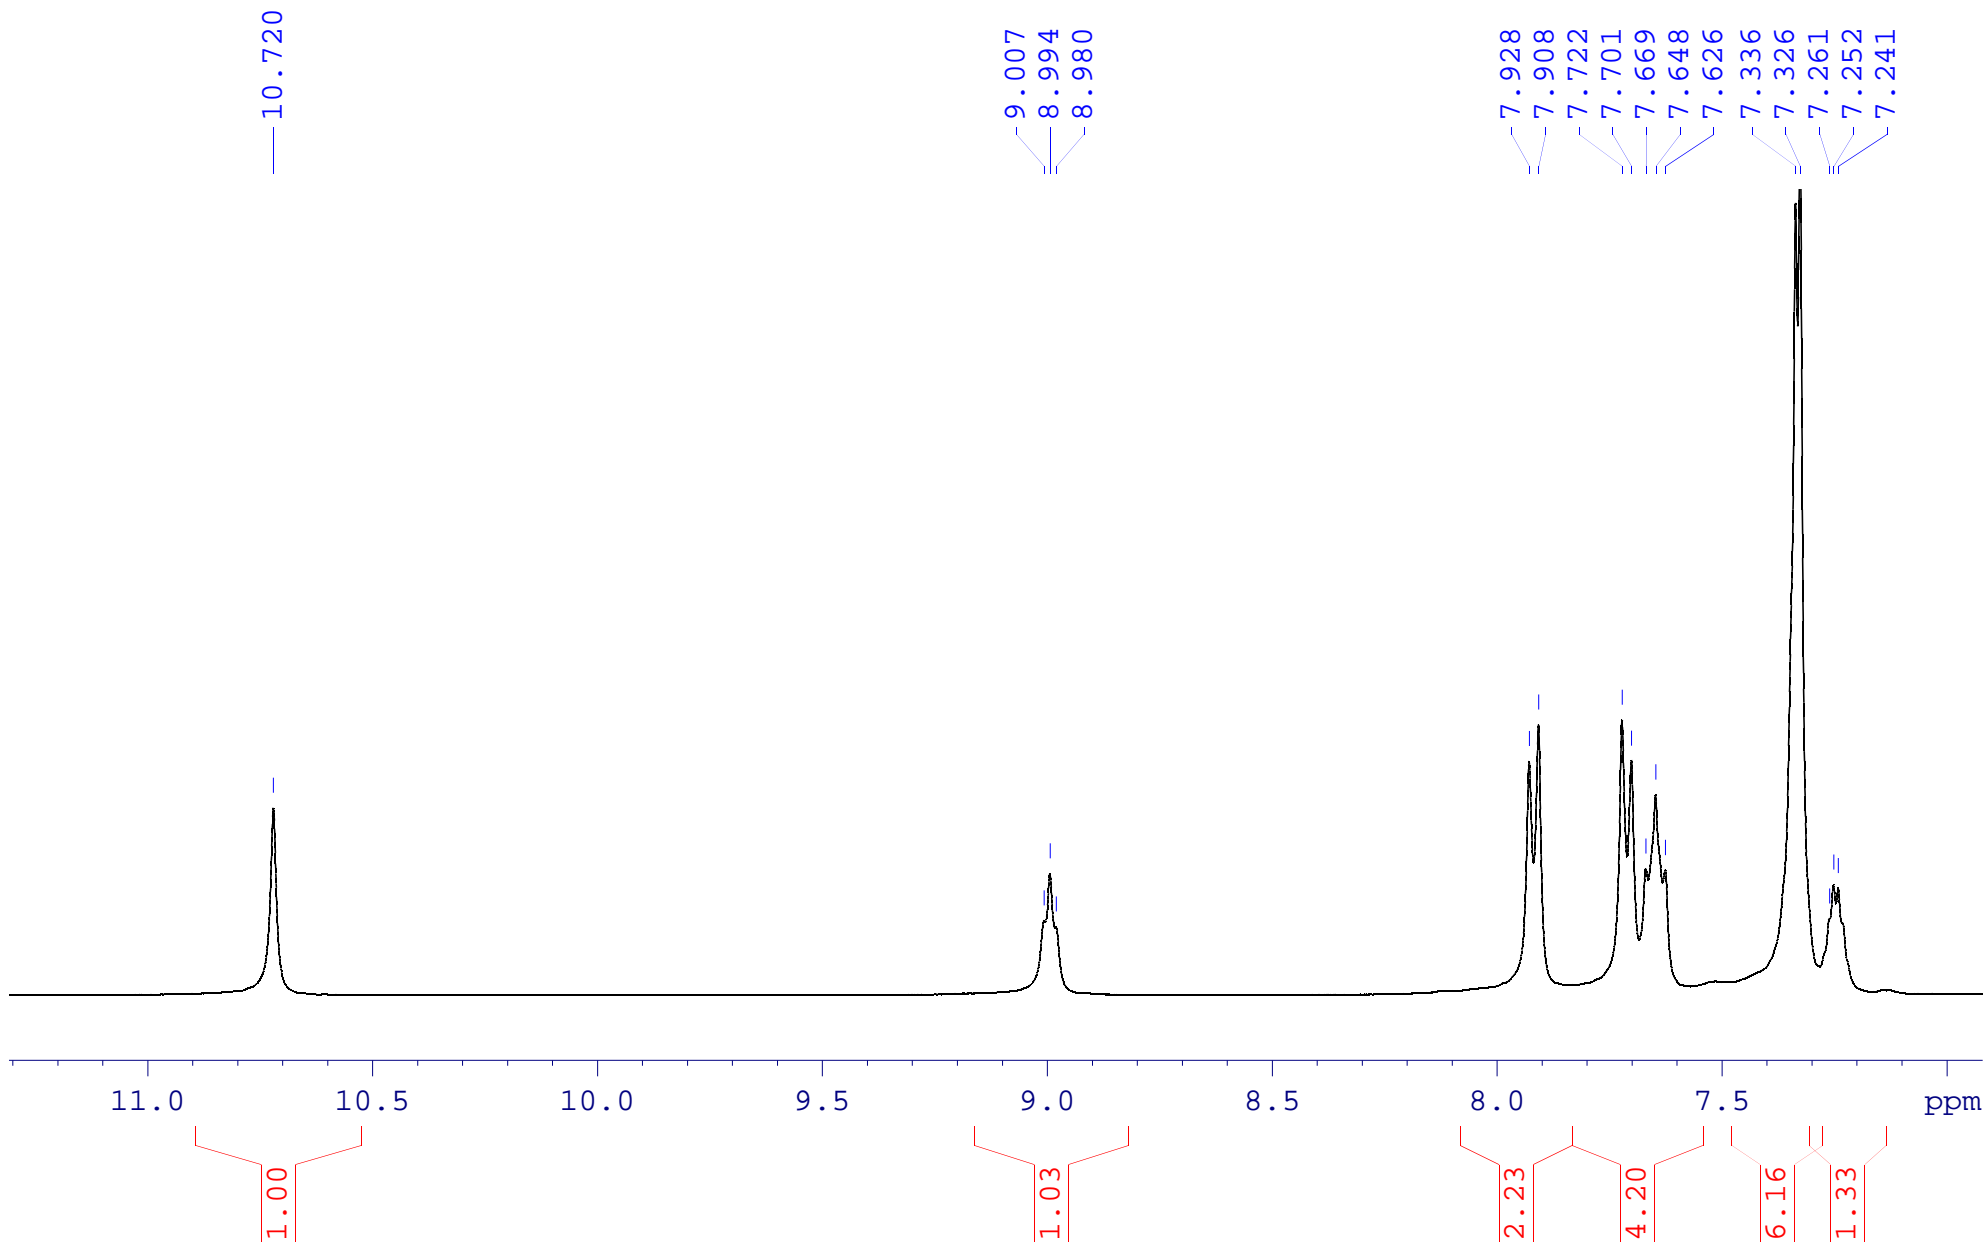

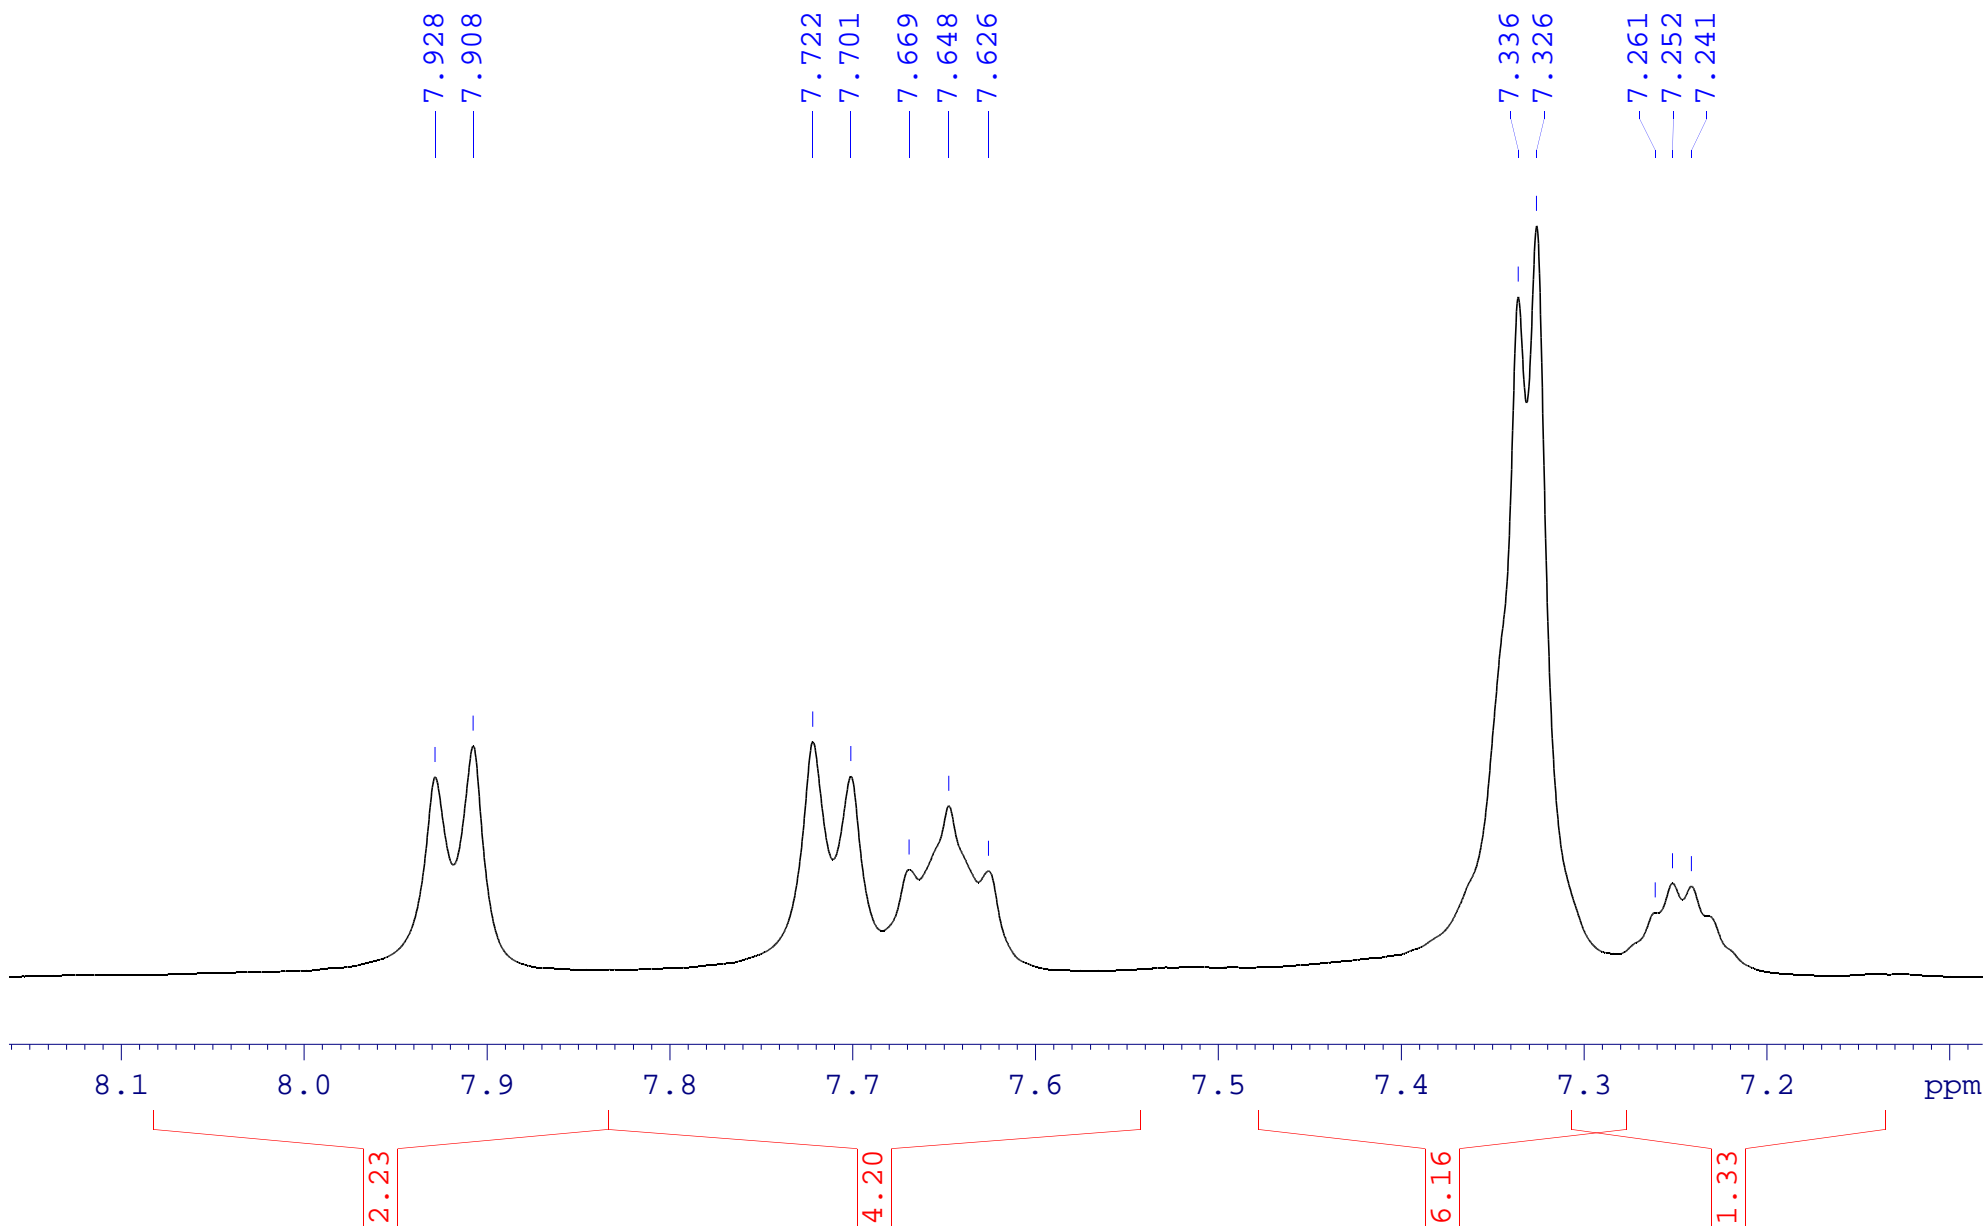

# <sup>13</sup>C NMR of compound 8i

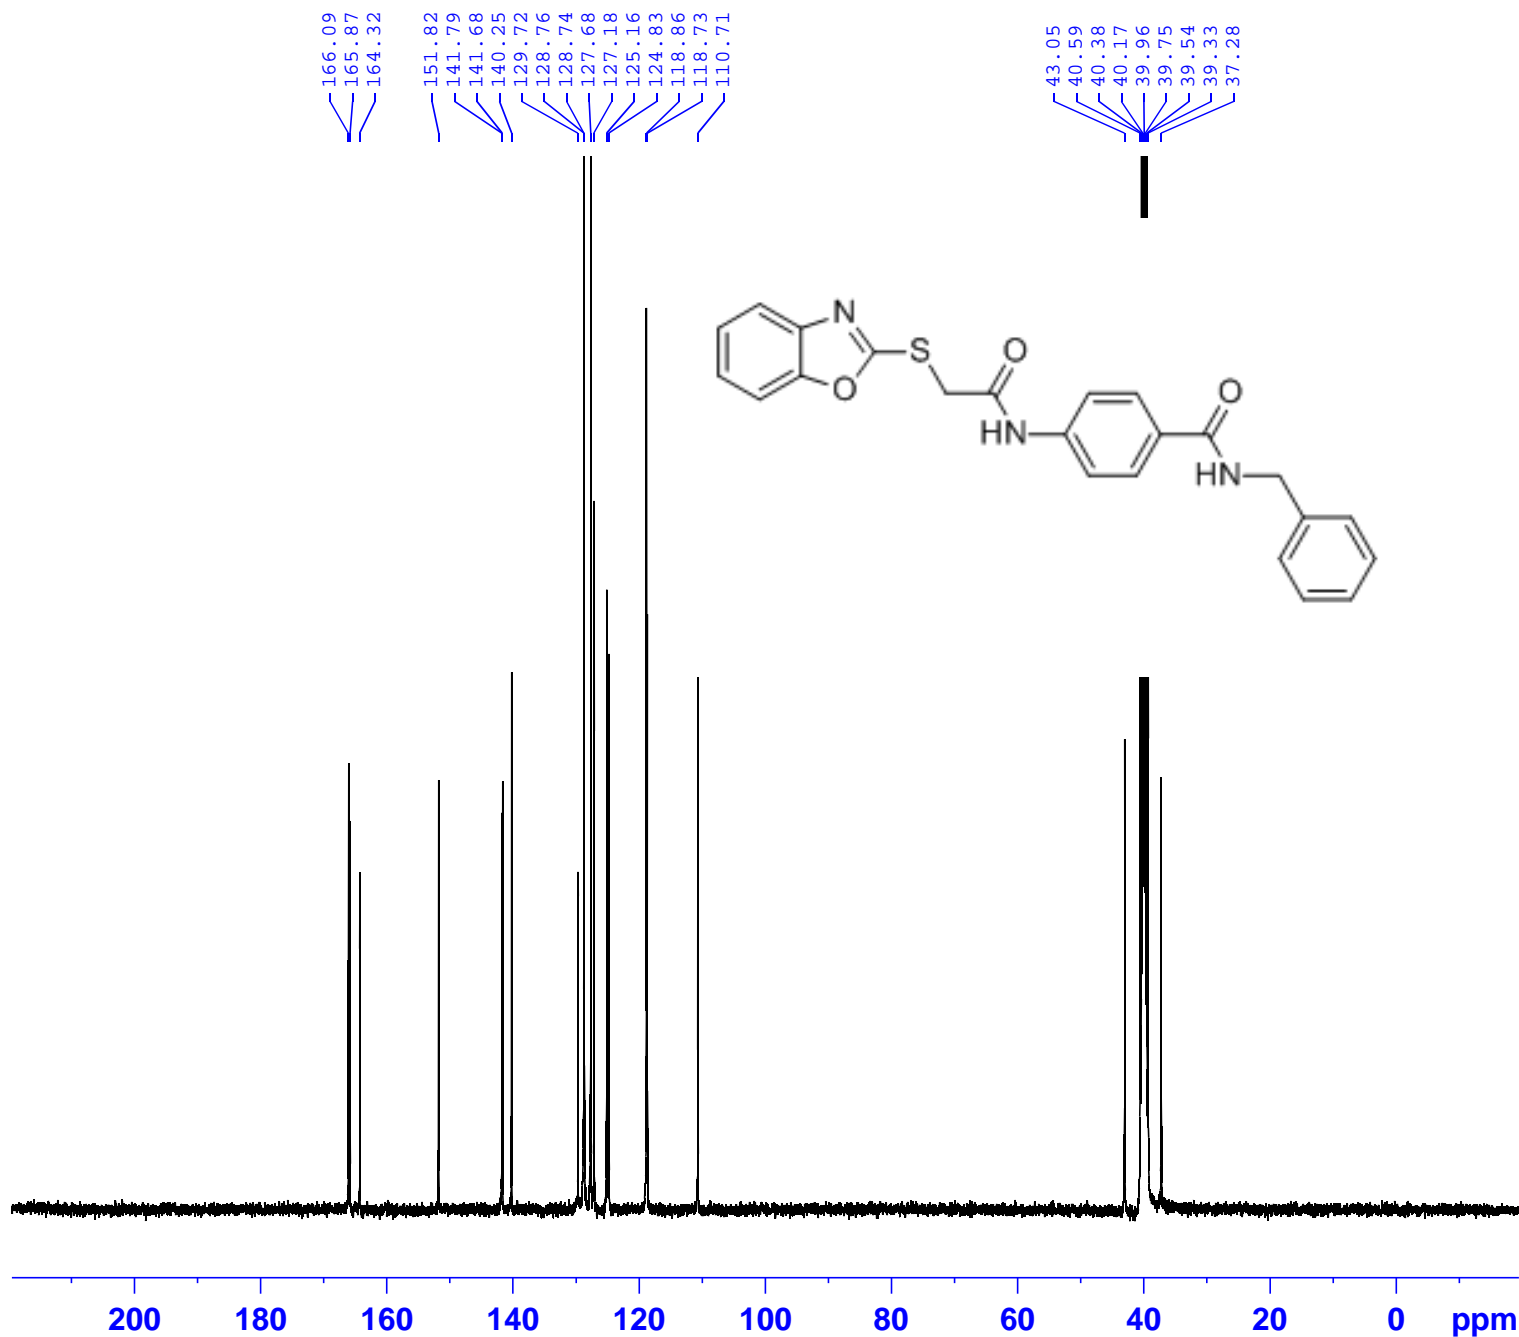

Current Data Parameters  
 NAME IbrahimEisa-PBA-11-C13NMR-Em  
 EXPNO 10  
 PROCNO 1

F2 - Acquisition Parameters  
 Date\_ 20220112  
 Time 23.23 h  
 INSTRUM spect  
 PROBHD Z108618\_0945 (   
 PULPROG zgpg30  
 TD 65536  
 SOLVENT DMSO  
 NS 2200  
 DS 4  
 SWH 24038.461 Hz  
 FIDRES 0.733596 Hz  
 AQ 1.3631488 sec  
 RG 197.77  
 DW 20.800 usec  
 DE 6.50 usec  
 TE 0 K  
 D1 2.00000000 sec  
 D11 0.03000000 sec  
 TD0 1  
 SFO1 100.6404331 MHz  
 NUC1 13C  
 P1 10.00 usec  
 PLW1 47.00000000 W  
 SFO2 400.2016008 MHz  
 NUC2 1H  
 CPDPRG[2] waltz16  
 PCPD2 90.00 usec  
 PLW2 13.00000000 W  
 PLW12 0.29249999 W  
 PLW13 0.14713000 W

F2 - Processing parameters  
 SI 32768  
 SF 100.6303700 MHz  
 WDW EM  
 SSB 0  
 LB 1.00 Hz  
 GB 0  
 PC 1.40

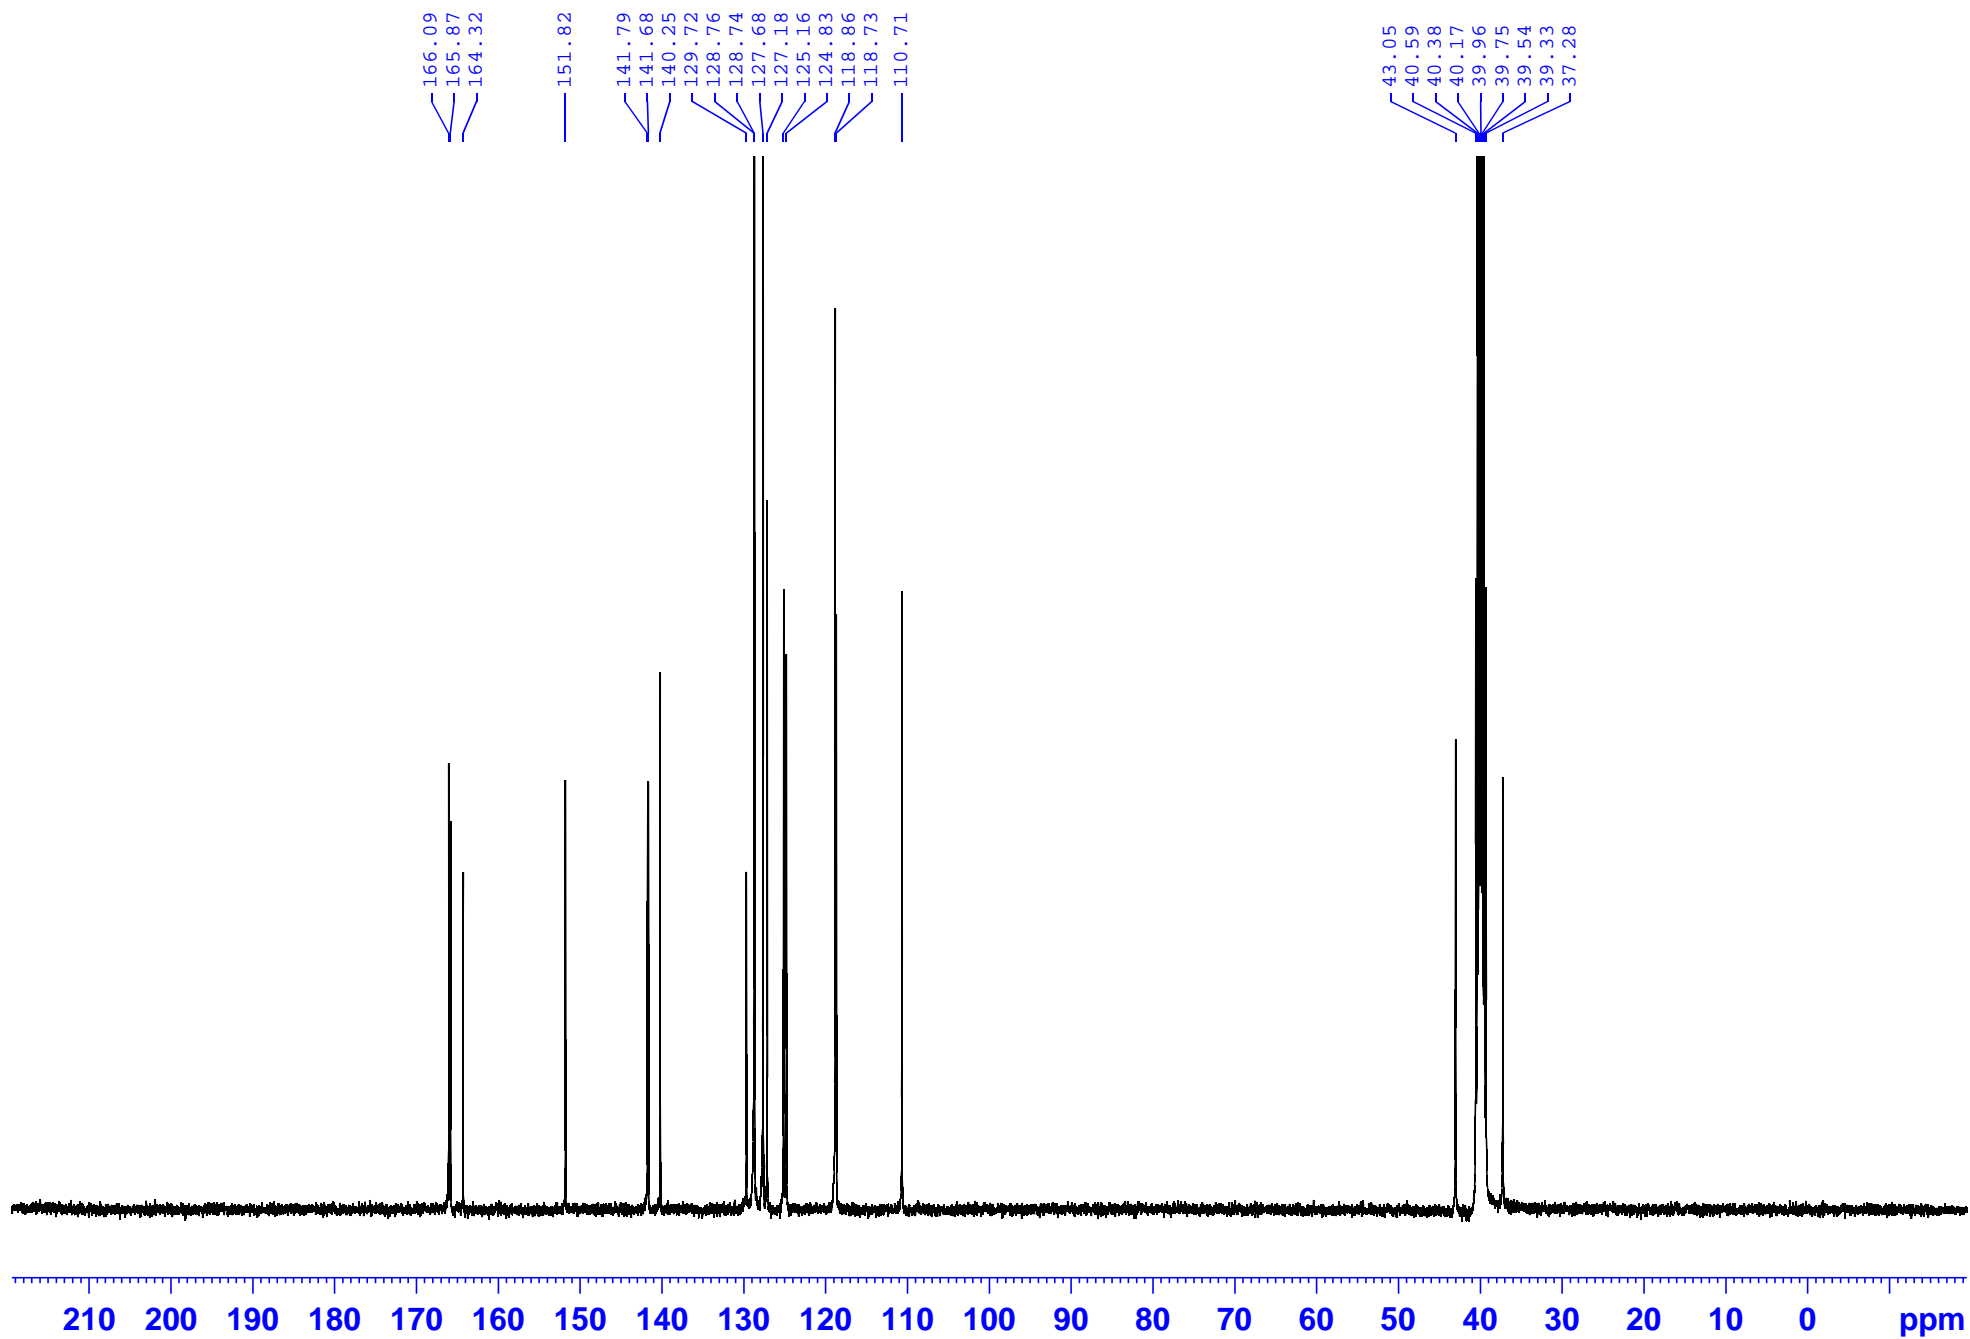

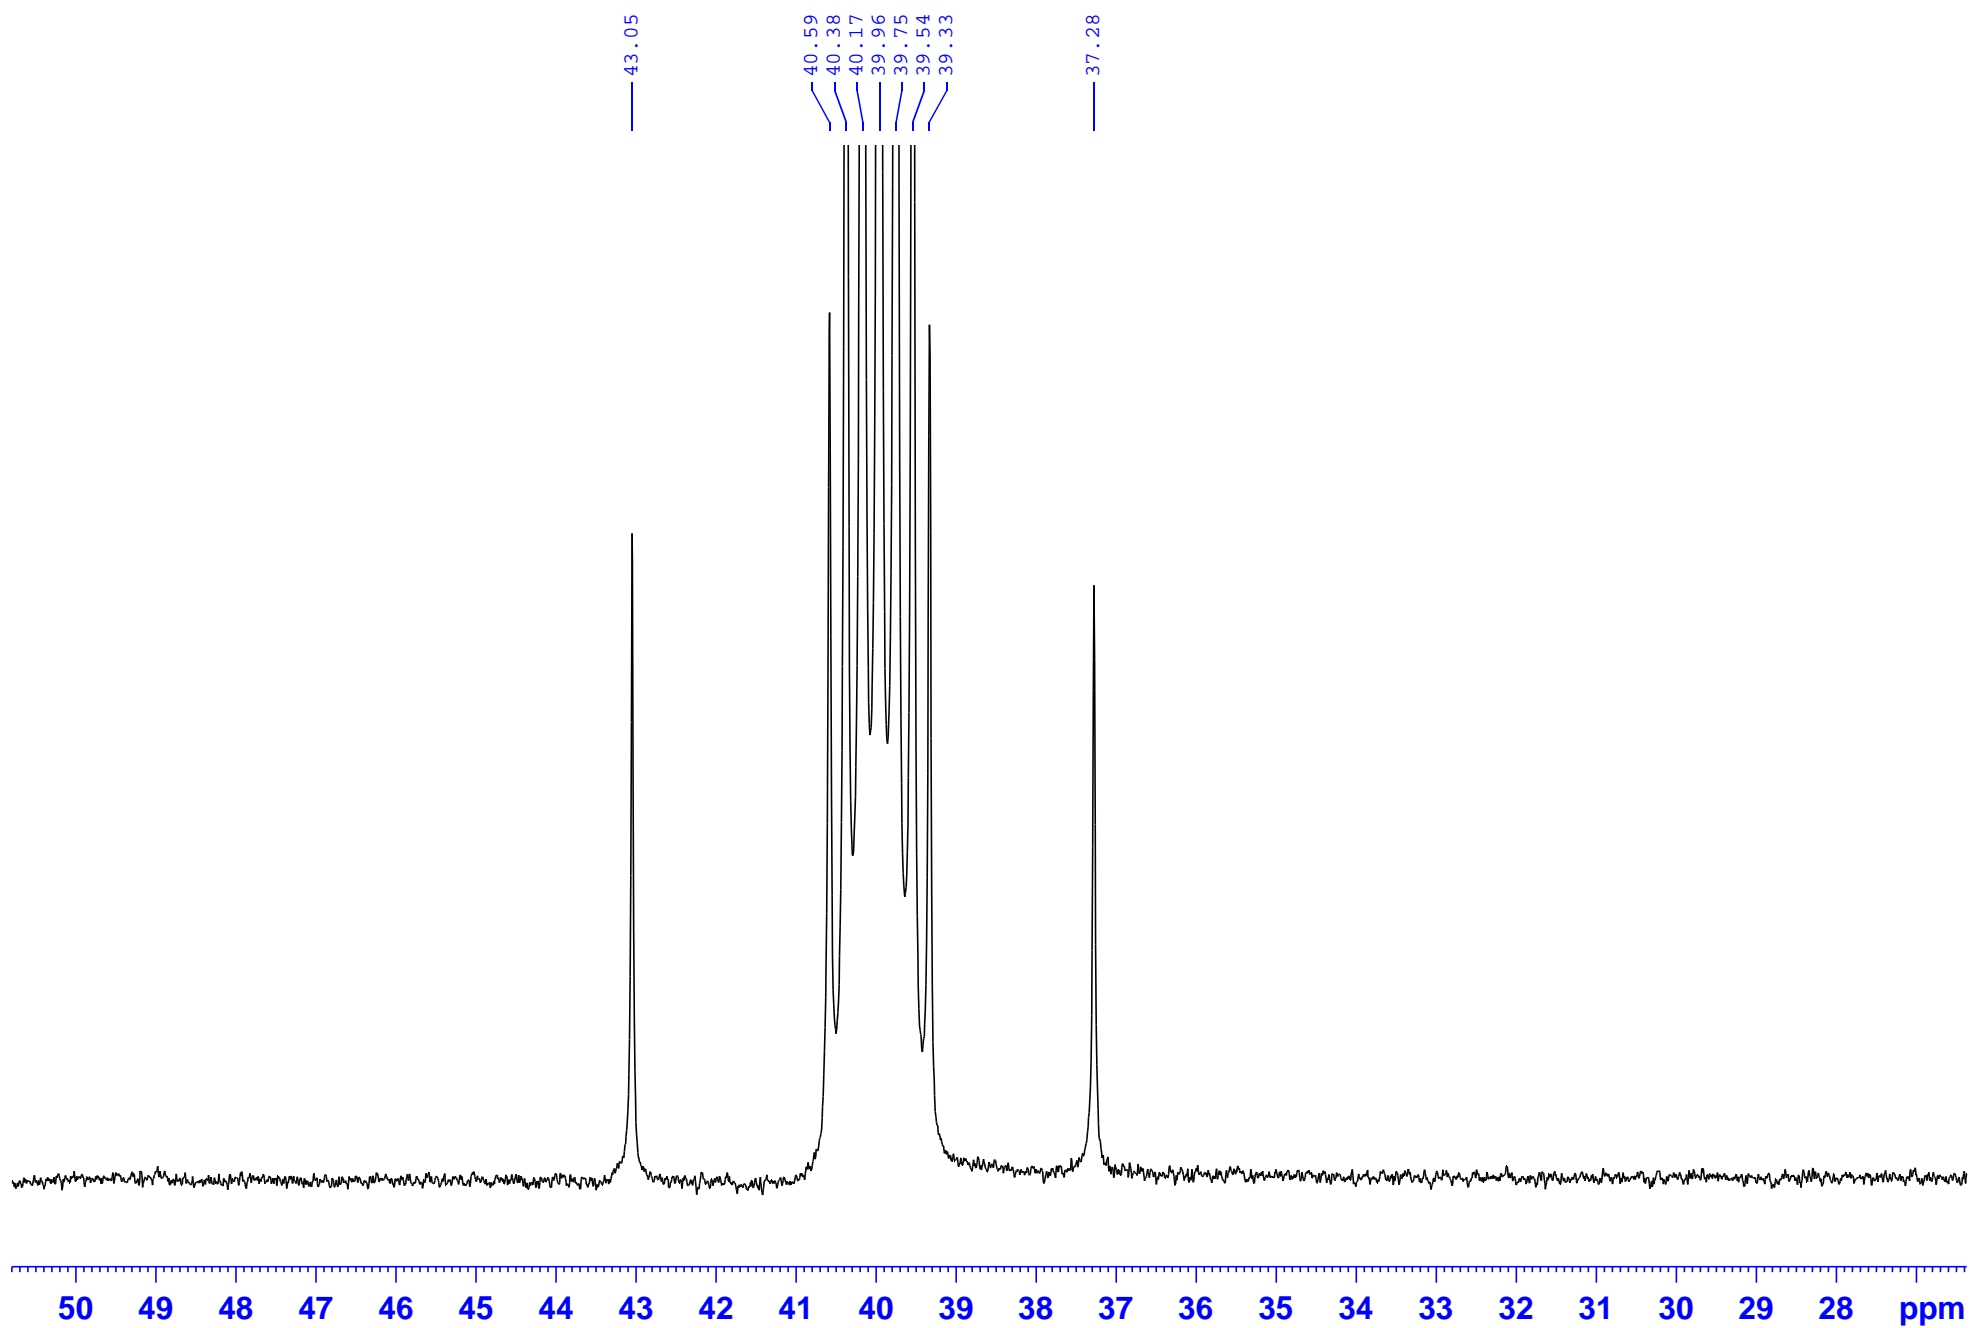

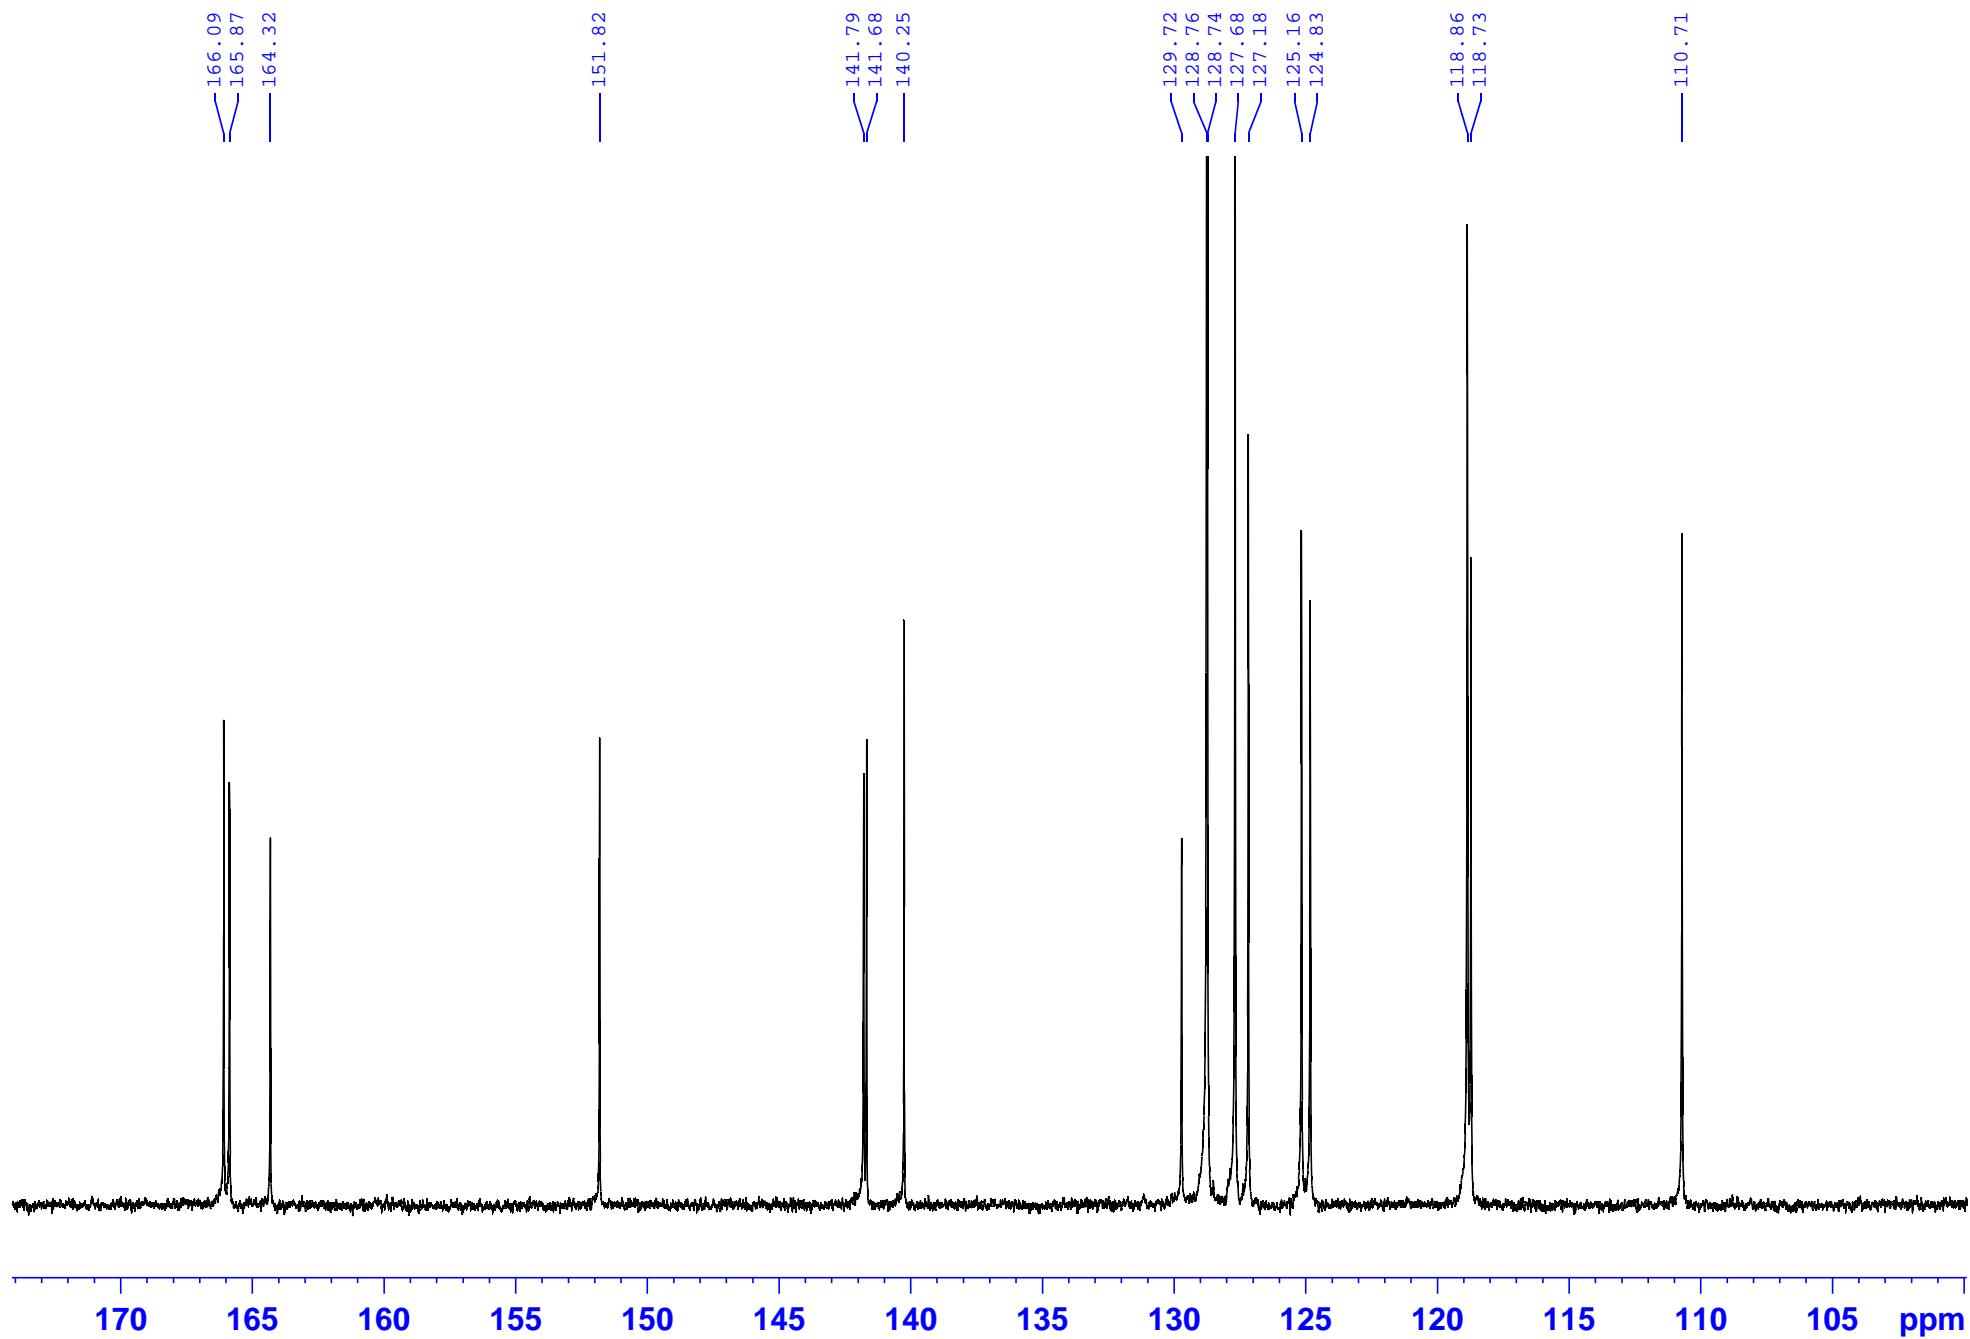

# Cairo University Micro Analytical Center

## DI Analysis Shimadzu Qp-2010 Plus

## Sample Information

Analyzed by : Dr. Mai Younis  
 Analyzed : 01/01/2007 09:54:40  
 Sample Name : 11  
 Sample ID :  
 Customer Name : Dr. Radwan Saeed - Pharmacy - Helwan  
 Data File : C:\GCMSsolution\Data\Project1\11.QGD  
 Org Data File : C:\GCMSsolution\Data\Project1\11.QGD  
 Method File : C:\GCMSsolution\Data\Project1\High Temperature Op  
 Org Method File : C:\GCMSsolution\Data\Project1\High Temperature Op  
 Report File :  
 Tuning File : C:\GCMSsolution\System\Tune1\\_default.qgt  
 \$EndIf\$Modified by : Dr. Mai Younis  
 Modified : 01/01/2007 09:58:42

## Method

Analytical Line 1  
 IonSourceTemp : 250.00 °C  
 [MS Table]  
 --Group 1 - Event 1--  
 Start Time : 0.00min  
 End Time : 10.00min  
 ACQ Mode : Scan  
 Event Time : 0.50sec  
 Scan Speed : 1250  
 Start m/z : 50.00  
 End m/z : 600.00

Electron Voltage : 70 eV  
 Ionization Mode : EI

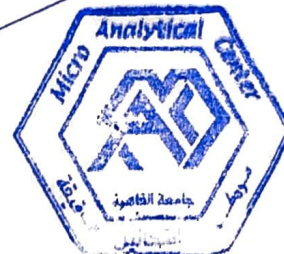

C:\GCMSsolution\Data\Project1\11.QGD

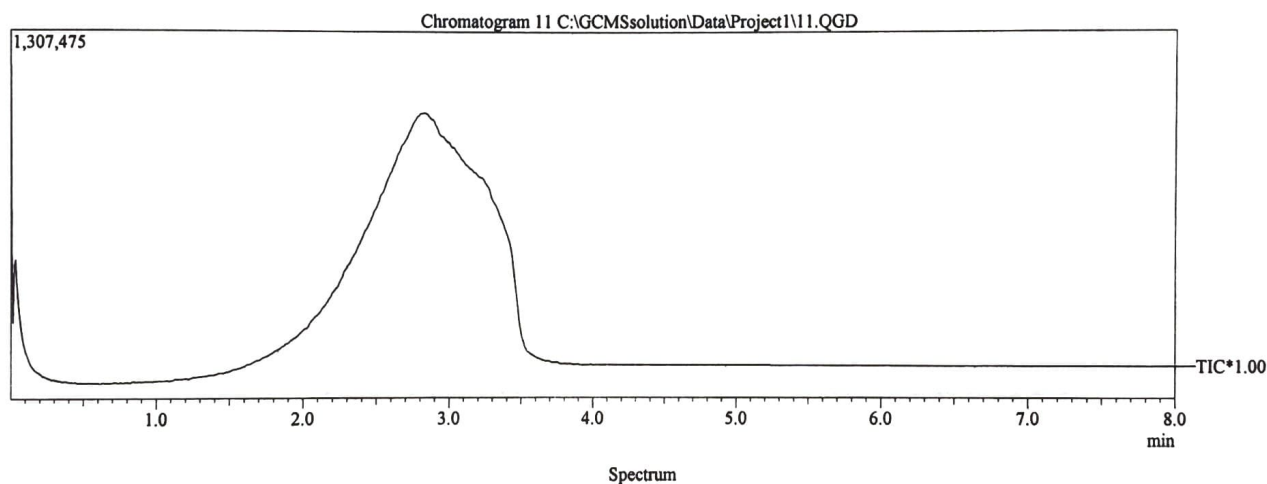

Line#:1 R.Time:2.9(Scan#:345)

MassPeaks:205

RawMode:Single 2.9(345) BasePeak:91(109930)

BG Mode:None Group 1 - Event 1

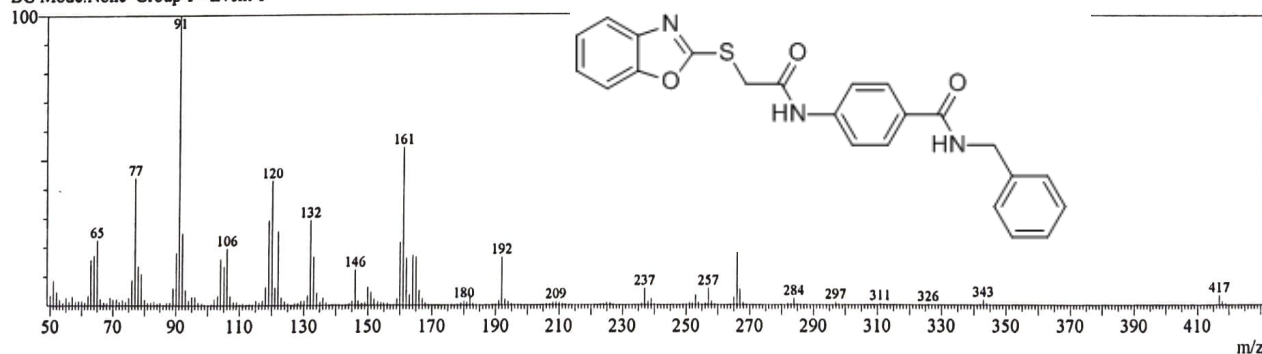

## Mass Table

Line#:1 R.Time:2.9(Scan#:345)

MassPeaks:205

RawMode:Single 2.9(345) BasePeak:91(109930)

BG Mode:None Group 1 - Event 1

| # | m/z   | Abs. In | Rel. Int. | # | m/z   | Abs. In | Rel. Int. | # | m/z   | Abs. In | Rel. Int. |
|---|-------|---------|-----------|---|-------|---------|-----------|---|-------|---------|-----------|
| 1 | 50.00 | 3788    | 3.45      | 4 | 53.00 | 2175    | 1.98      | 7 | 56.05 | 1398    | 1.27      |
| 2 | 51.00 | 9628    | 8.76      | 5 | 54.05 | 1088    | 0.99      | 8 | 57.00 | 3508    | 3.19      |
| 3 | 52.00 | 5138    | 4.67      | 6 | 55.00 | 3108    | 2.83      | 9 | 58.00 | 1494    | 1.36      |



# IR of compound 8j

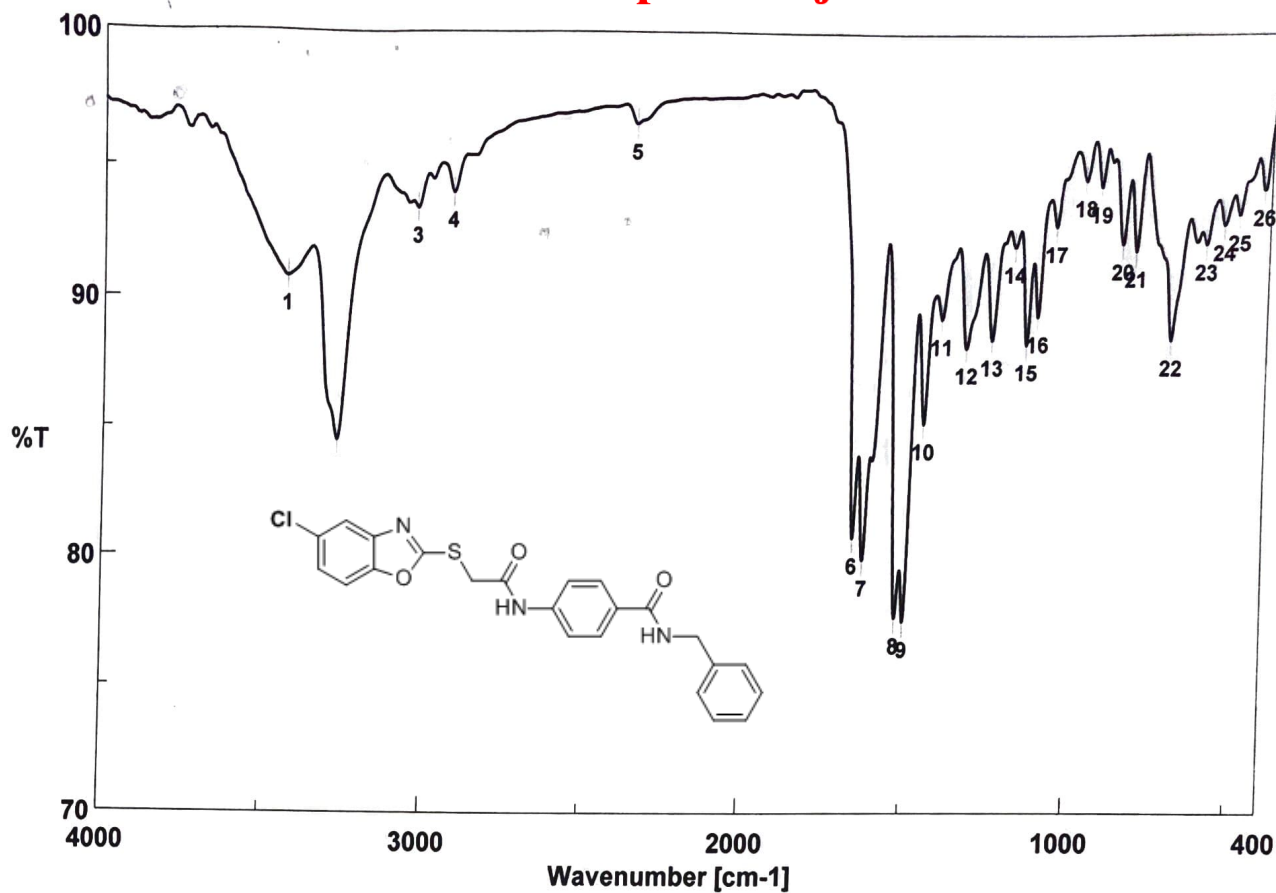

Accumulation 16  
 Resolution 4 cm-1  
 Zero Filling ON  
 Apodization Cosine  
 Gain Auto (2)  
 Scanning Speed Auto (2 mm/sec)  
 Date/Time 8/22/2021 2:09PM  
 Update 8/22/2021 2:10PM  
 Operator IR  
 File Name Memory#133  
 Sample Name CBA -11  
 Comment

| No. | cm-1    | %T      | No. | cm-1    | %T      | No. | cm-1    | %T      |
|-----|---------|---------|-----|---------|---------|-----|---------|---------|
| 1   | 3431.71 | 90.7747 | 2   | 3271.64 | 84.4334 | 3   | 3033.48 | 93.3552 |
| 4   | 2923.56 | 93.9516 | 5   | 2359.48 | 96.5564 | 6   | 1662.34 | 80.6504 |
| 7   | 1630.52 | 79.7941 | 8   | 1527.35 | 77.5667 | 9   | 1501.31 | 77.437  |
| 10  | 1452.14 | 85.0721 | 11  | 1402    | 89.1454 | 12  | 1324.86 | 88.0203 |
| 13  | 1247.72 | 88.337  | 14  | 1181.19 | 91.9549 | 15  | 1141.65 | 88.1656 |
| 16  | 1108.87 | 89.2503 | 17  | 1055.84 | 92.7487 | 18  | 968.09  | 94.5116 |
| 19  | 920.843 | 94.2747 | 20  | 850.454 | 92.0703 | 21  | 808.992 | 91.7935 |
| 22  | 695.212 | 88.365  | 23  | 593.968 | 92.0569 | 24  | 539.971 | 92.7973 |
| 25  | 494.652 | 93.1686 | 26  | 422.334 | 94.1241 |     |         |         |

فأله الم  
 محمد الم

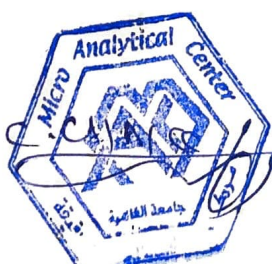

# <sup>1</sup>H NMR of compound 8j



10.737  
9.003  
8.989  
8.975  
7.914  
7.892  
7.757  
7.753  
7.716  
7.703  
7.695  
7.682  
7.392  
7.388  
7.371  
7.366  
7.332  
7.323  
7.263  
7.254  
7.243  
4.490  
4.475  
4.458  
3.382  
2.515

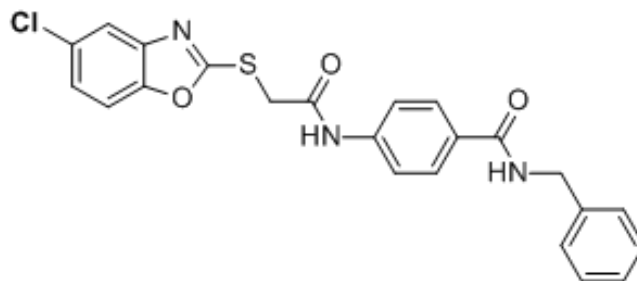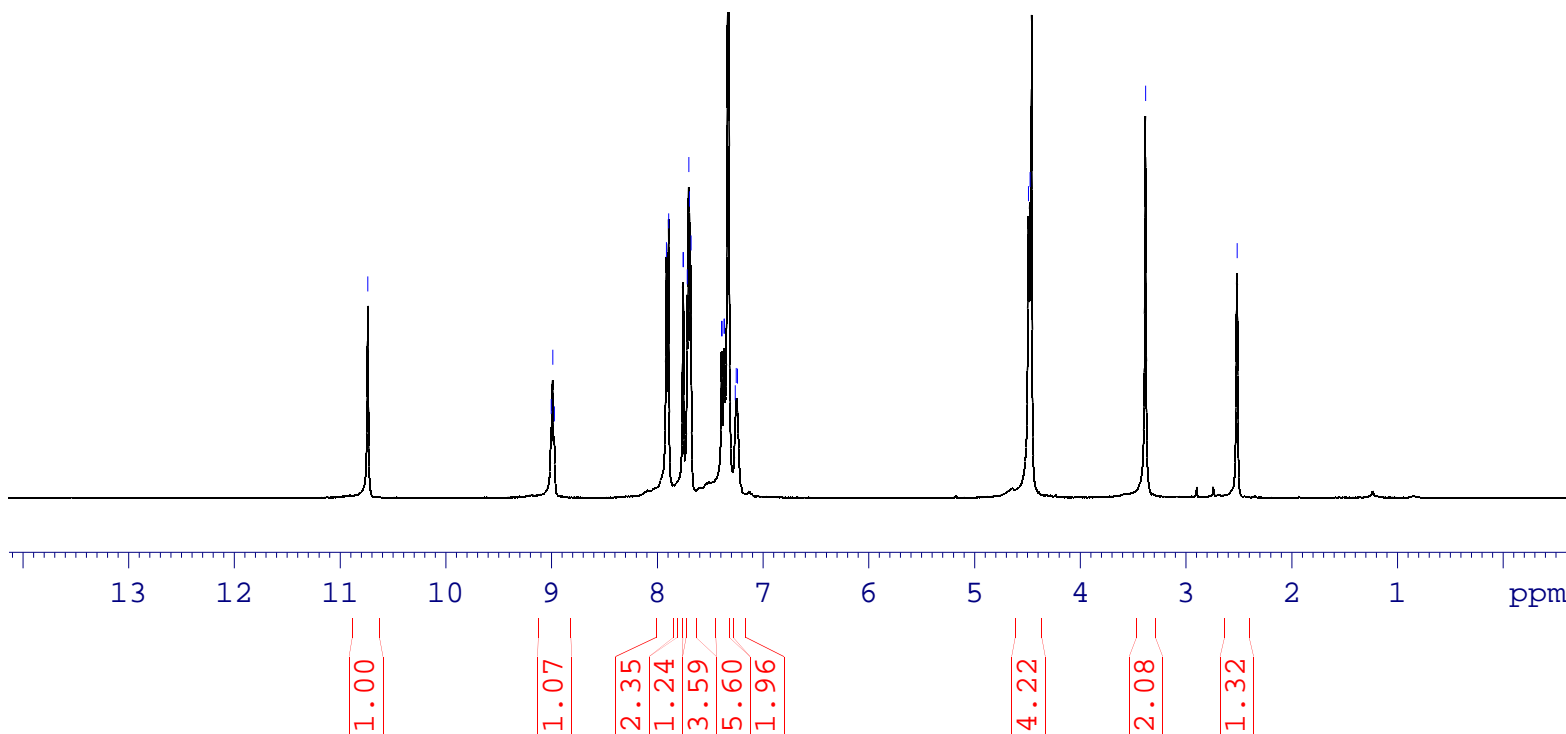

Current Data Parameters  
NAME Ibrahim Eissa- CBA11x-proton-DMSO-D  
EXPNO 10  
PROCNO 1

F2 - Acquisition Parameters  
Date\_ 20220111  
Time 12.39 h  
INSTRUM spect  
PROBHD Z108618\_0945 (  
PULPROG zg30  
TD 65536  
SOLVENT DMSO  
NS 16  
DS 2  
SWH 8012.820 Hz  
FIDRES 0.244532 Hz  
AQ 4.0894465 sec  
RG 120.93  
DW 62.400 usec  
DE 6.50 usec  
TE 0 K  
D1 1.00000000 sec  
TD0 1  
SF01 400.2024712 MHz  
NUC1 1H  
P1 13.50 usec  
PLW1 13.00000000 W

F2 - Processing parameters  
SI 65536  
SF 400.2000000 MHz  
WDW EM  
SSB 0  
LB 0.30 Hz  
GB 0  
PC 1.00

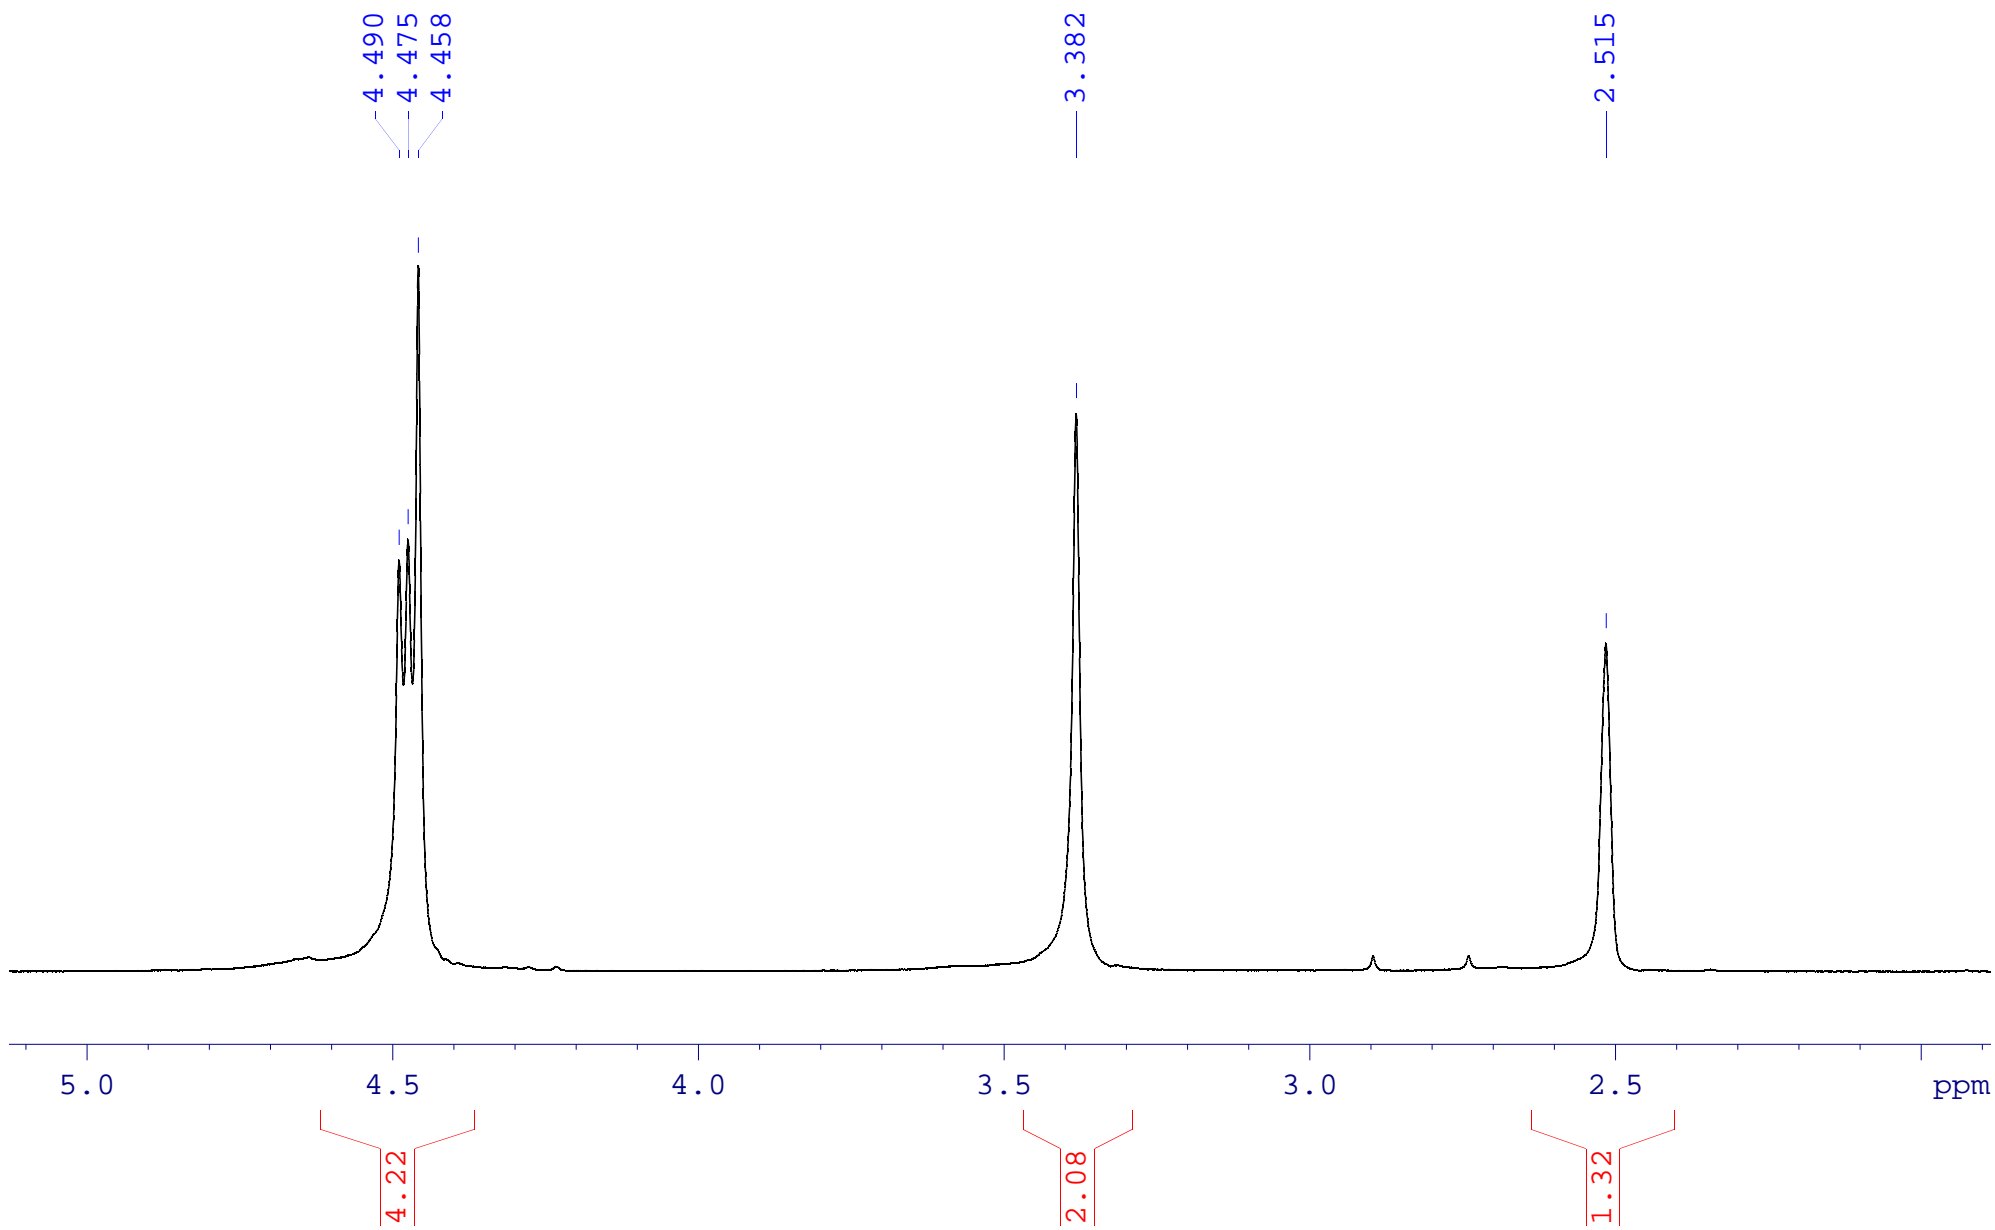

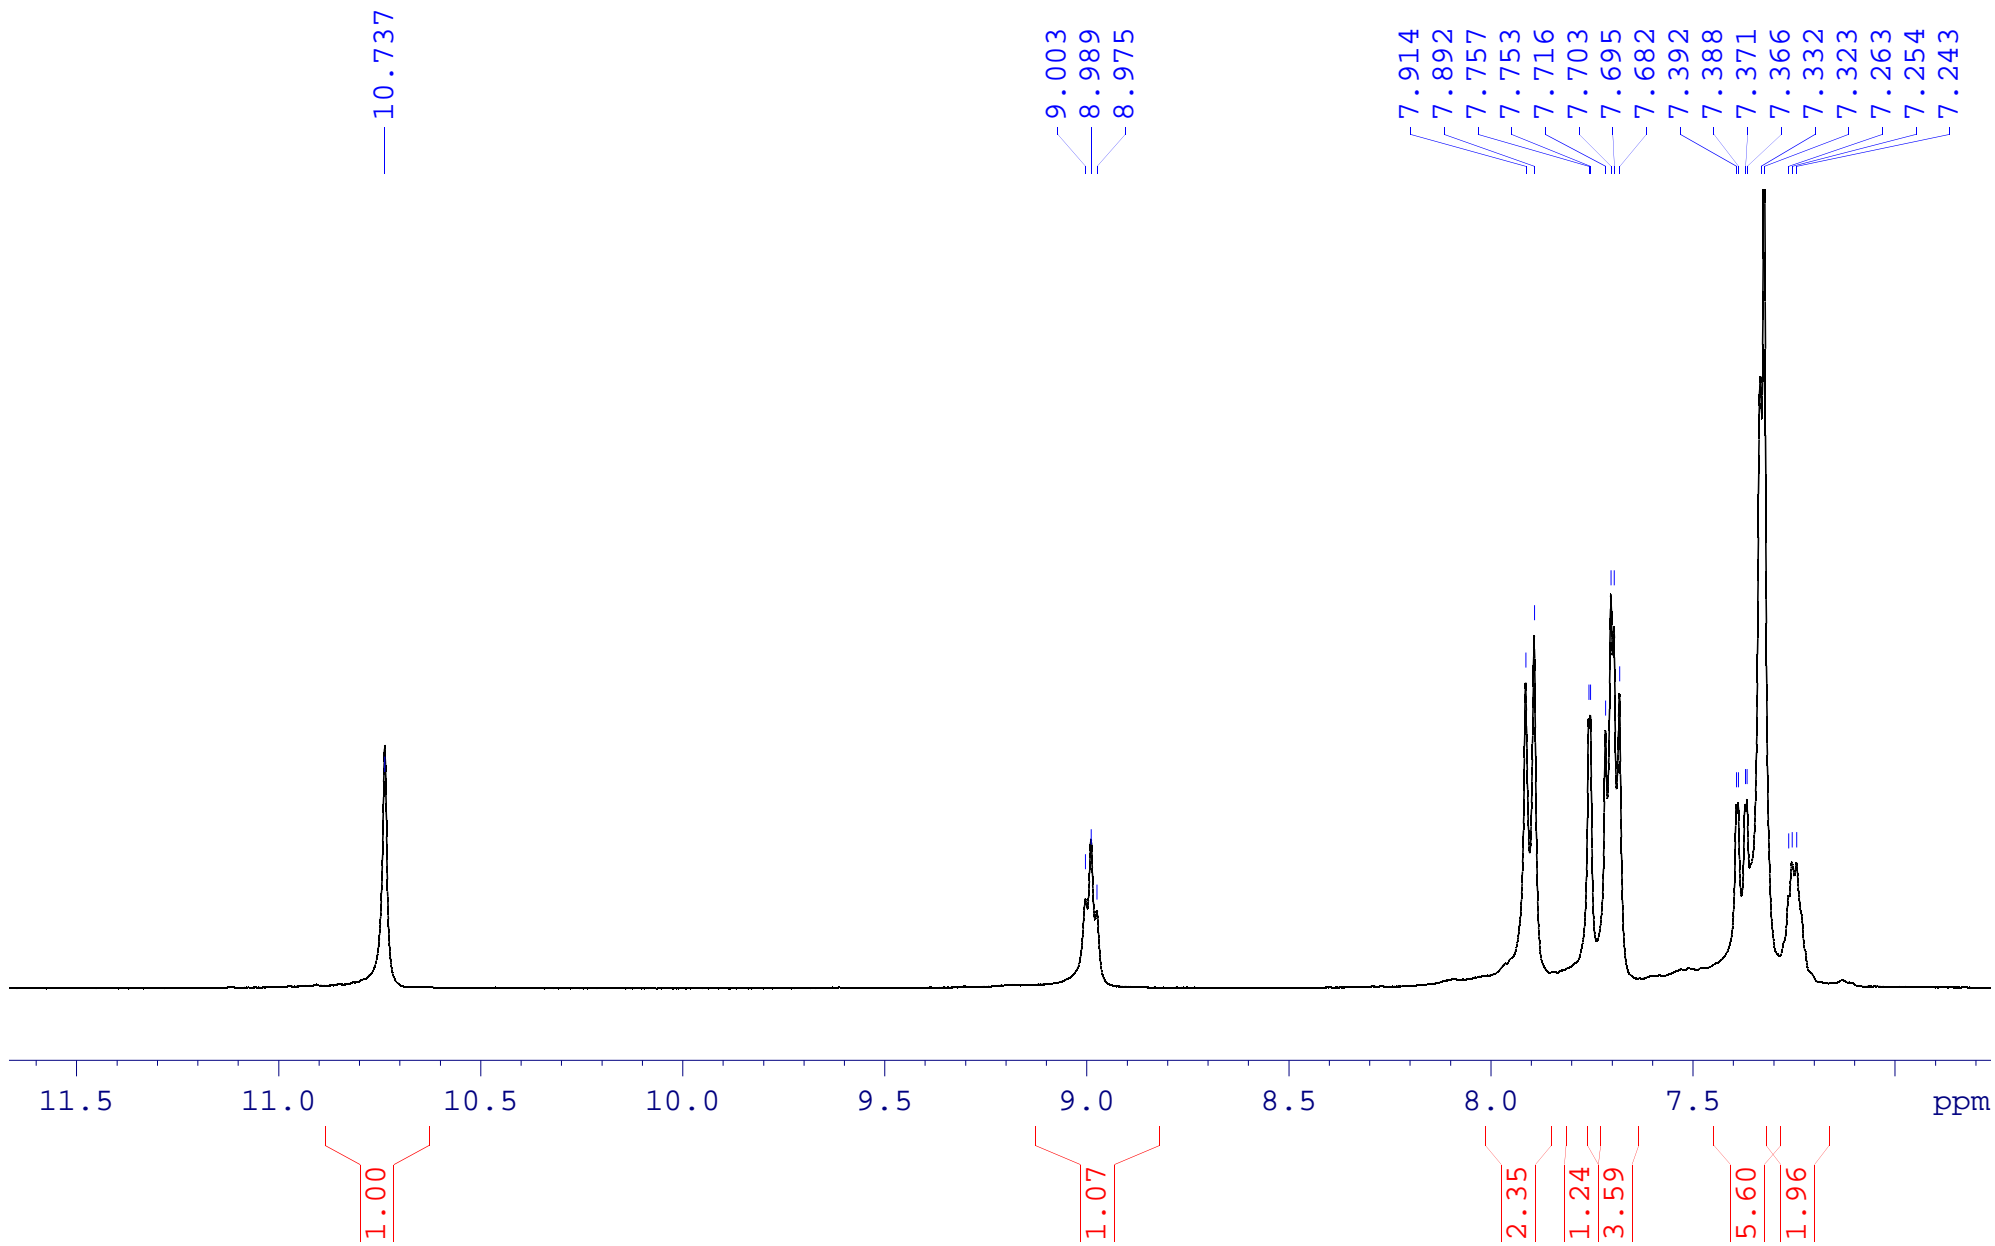

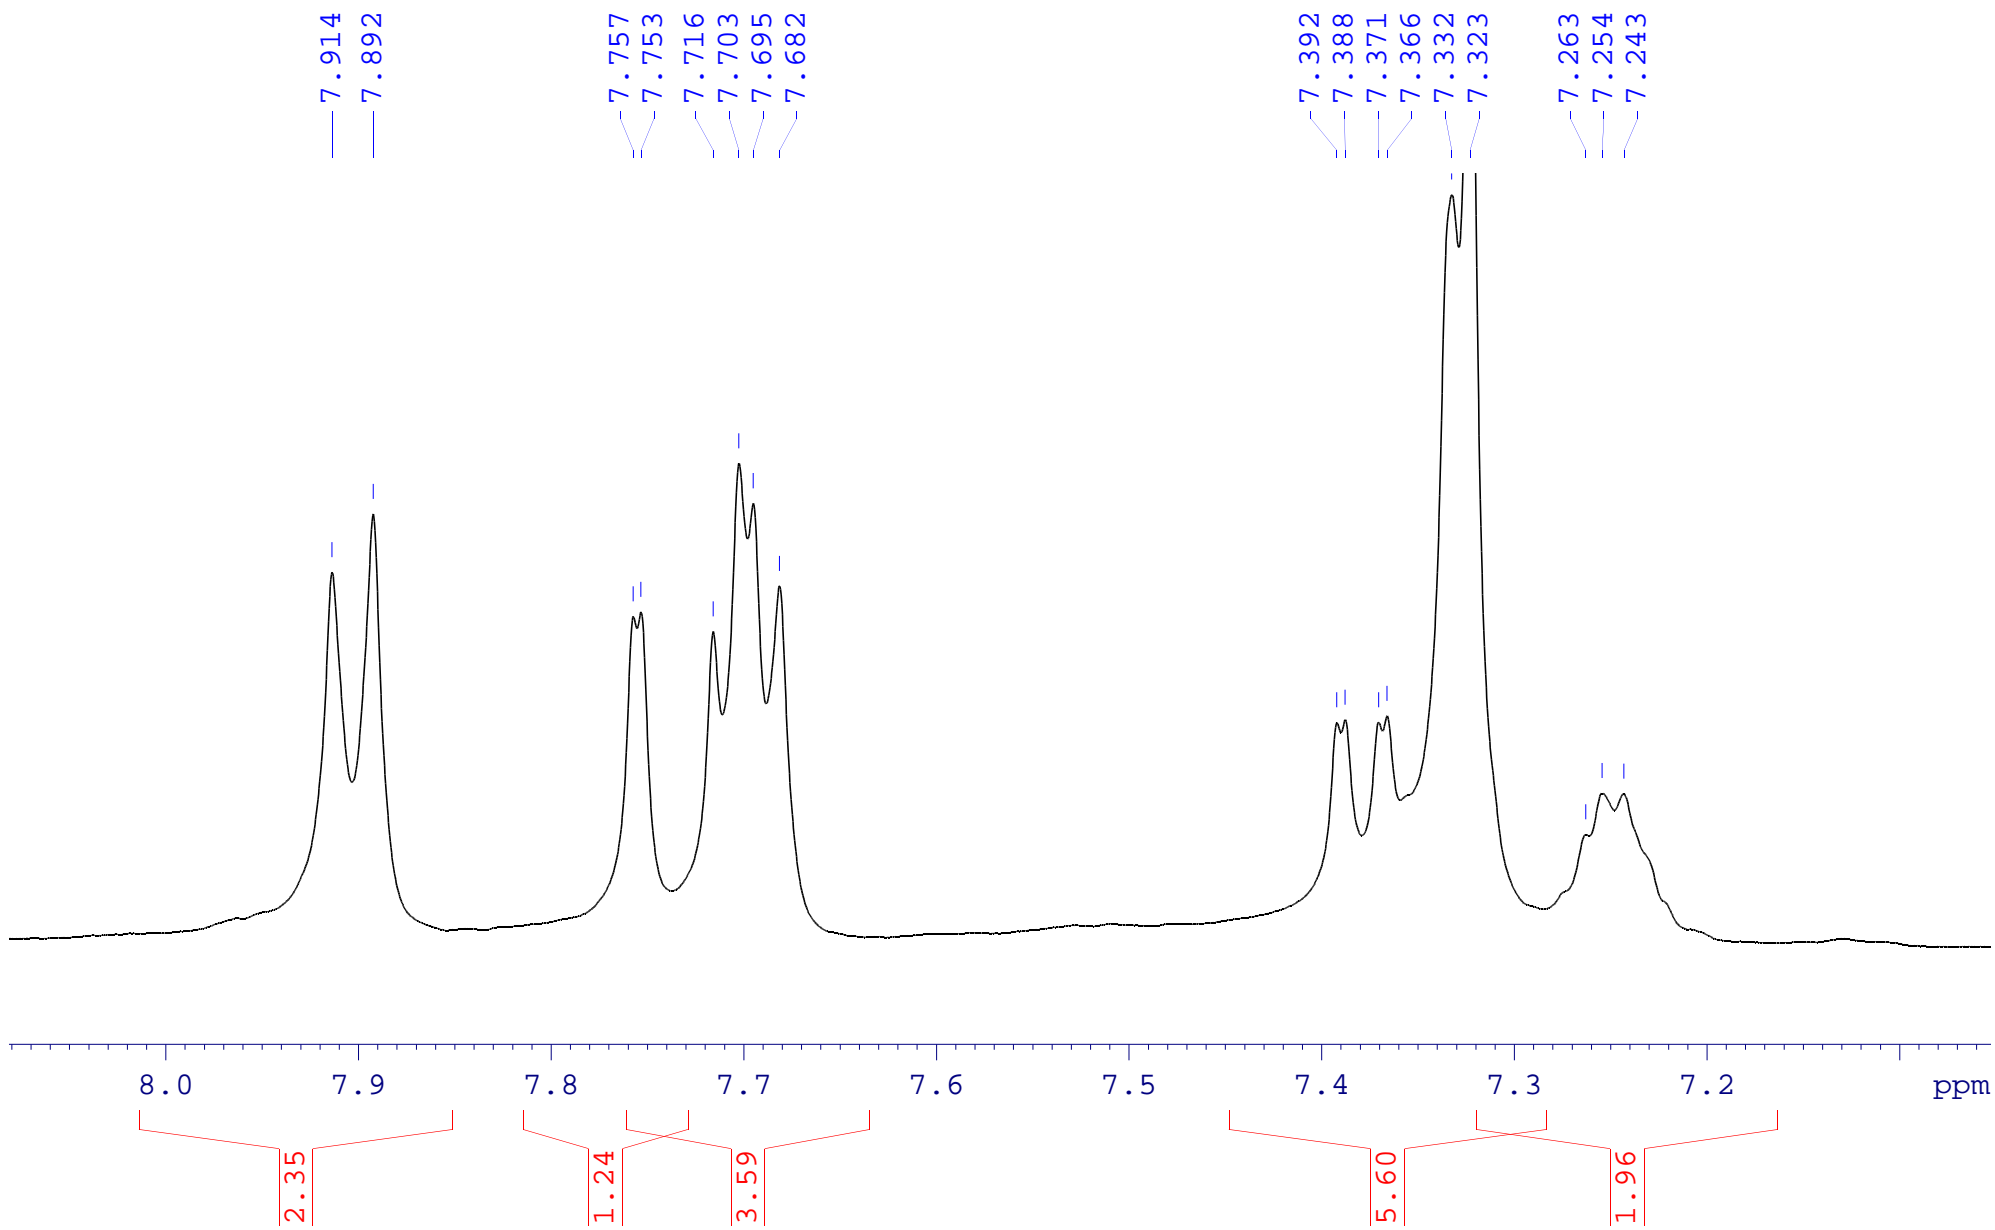

### <sup>13</sup>C NMR of compound 8j

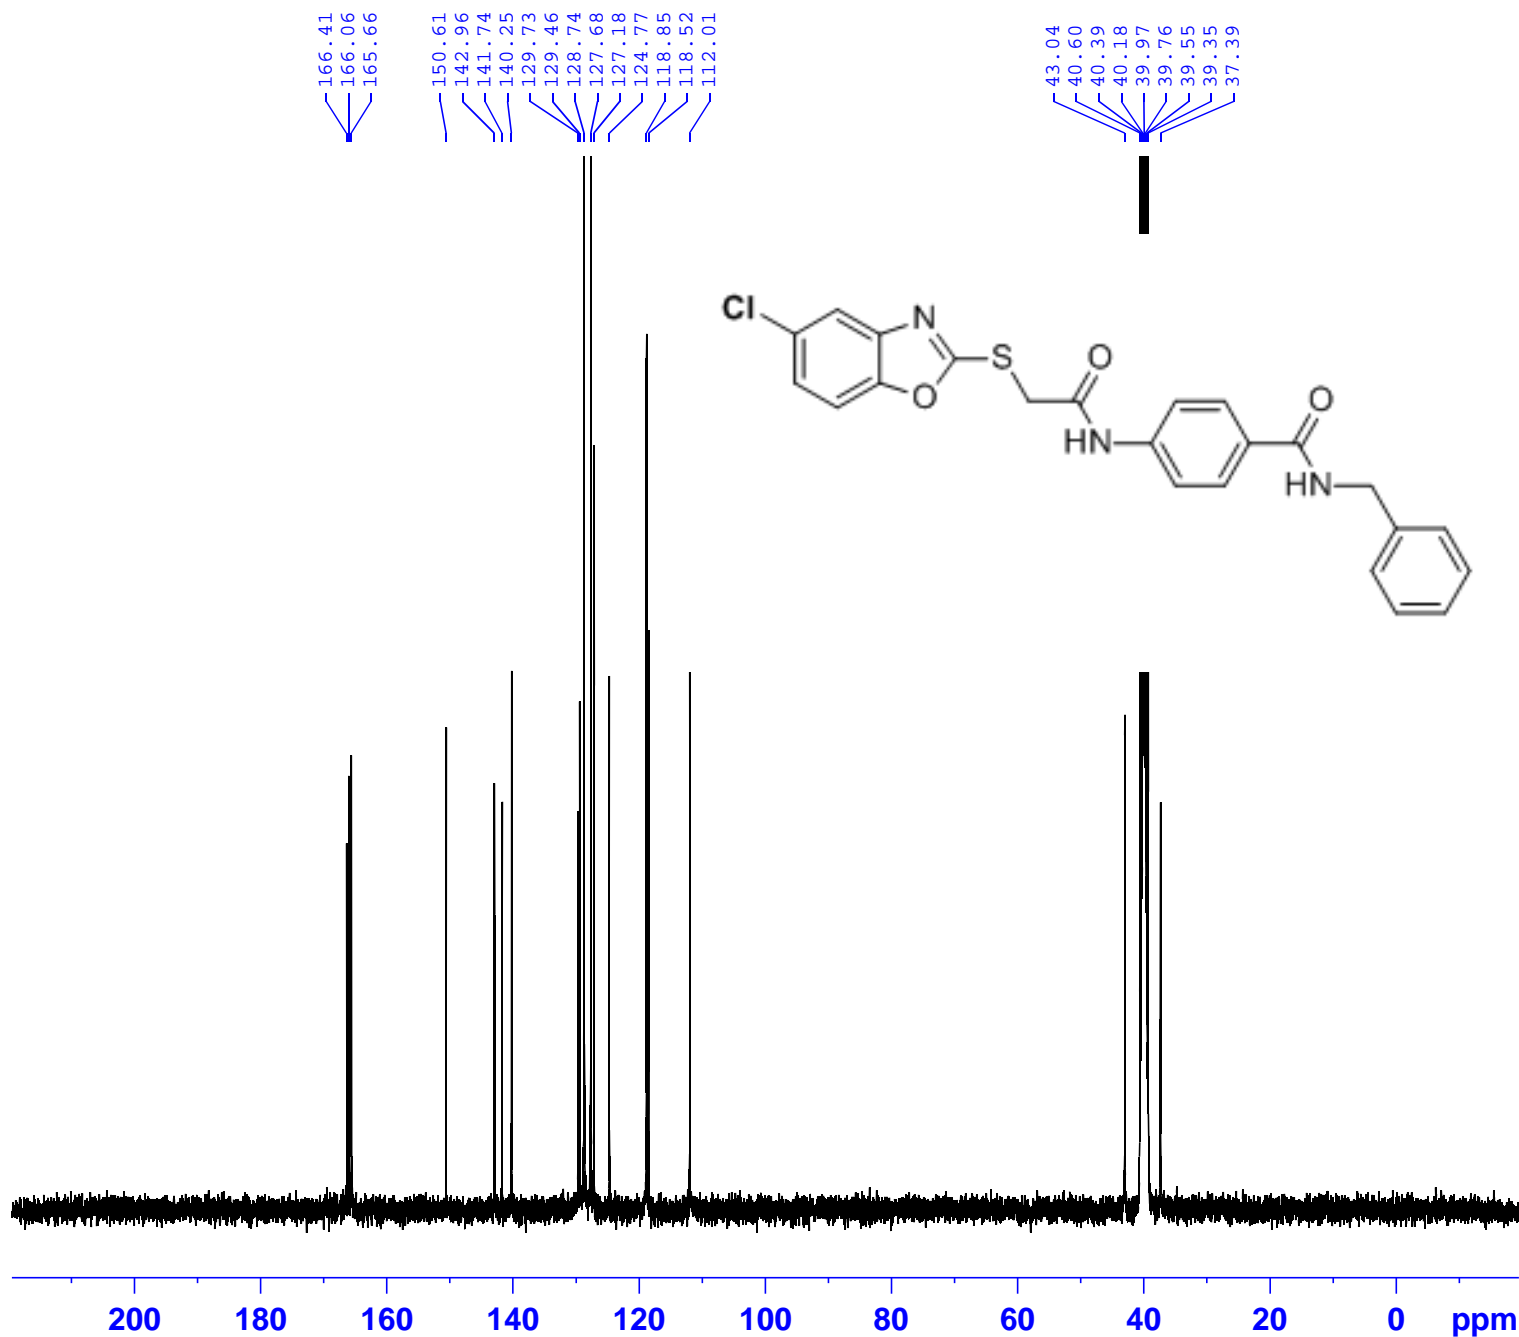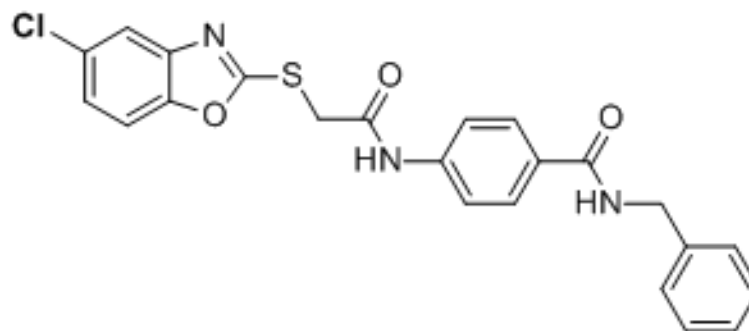

```
Current Data Parameters
NAME      IbrahimEisa-CBA-11X-Cl3NMR-Em
EXPNO           10
PROCNO          1
```

## F2 - Acquisition Parameters

Date\_ 20220112

```
Time          16.55 h
```

INSTRUM spect

PROBHD Z108618\_0945 (

|         |        |
|---------|--------|
| PULPROG | zgpg30 |
| TD      | 65536  |

|         |       |
|---------|-------|
| TD      | 65536 |
| SOLVENT | DMSO  |

|         |      |
|---------|------|
| SOLVENT | DMSO |
| NS      | 2200 |

|    |      |
|----|------|
| NS | 2200 |
| DS | 4    |

|     |           |
|-----|-----------|
| DS  | 4         |
| SWH | 24038.461 |

|        |           |    |
|--------|-----------|----|
| SWH    | 24050.401 | Hz |
| FIDRES | 0.733596  | Hz |

```
AQ      1.3631488 sec
```

|    |        |
|----|--------|
| RG | 197.77 |
|----|--------|

|    |        |     |
|----|--------|-----|
| DW | 20.800 | use |
| FF | 1.50   |     |

|    |           |
|----|-----------|
| DE | 6.50 usec |
| TE | 0.15      |

TE 0 K  
D1 2.000000000 500

|     |             |     |
|-----|-------------|-----|
| D1  | 2.000000000 | sec |
| D11 | 0.030000000 | sec |

```

D11          0.03000000 sec
TR0          1

```

SFO1 100.6404331 MHz

NUC1 13C

```

P1          10.00 usec

```

PLW1            47.00000000 W

SFO2 400.2016008 MHz

|         |       |
|---------|-------|
| NUC2    | 1H    |
| CCCCC1C | 14 16 |

```
CPDPRG[2          waltz16
BCDD2            00 00 0000
```

```
PCPD2          90.00 usec
PLW2          13.000000000 W
```

|       |             |   |
|-------|-------------|---|
| PLW2  | 13.00000000 | W |
| PLW12 | 0.29249999  | W |

|       |            |   |
|-------|------------|---|
| PLW12 | 0.29249999 | W |
| PLW13 | 0.14713000 | W |

PLW13 0.14713000 W

## F2 - Processing parameters

SI 32768

SF 100.6303700 MHz

WDW EM

SSB 0  
LB 1.00 U=

|    |      |    |
|----|------|----|
| LB | 1.00 | Hz |
| CB | 0    |    |

|    |   |    |  |
|----|---|----|--|
| GB | 0 |    |  |
| PC | 1 | 40 |  |

|    |      |
|----|------|
| PC | 1.40 |
|----|------|

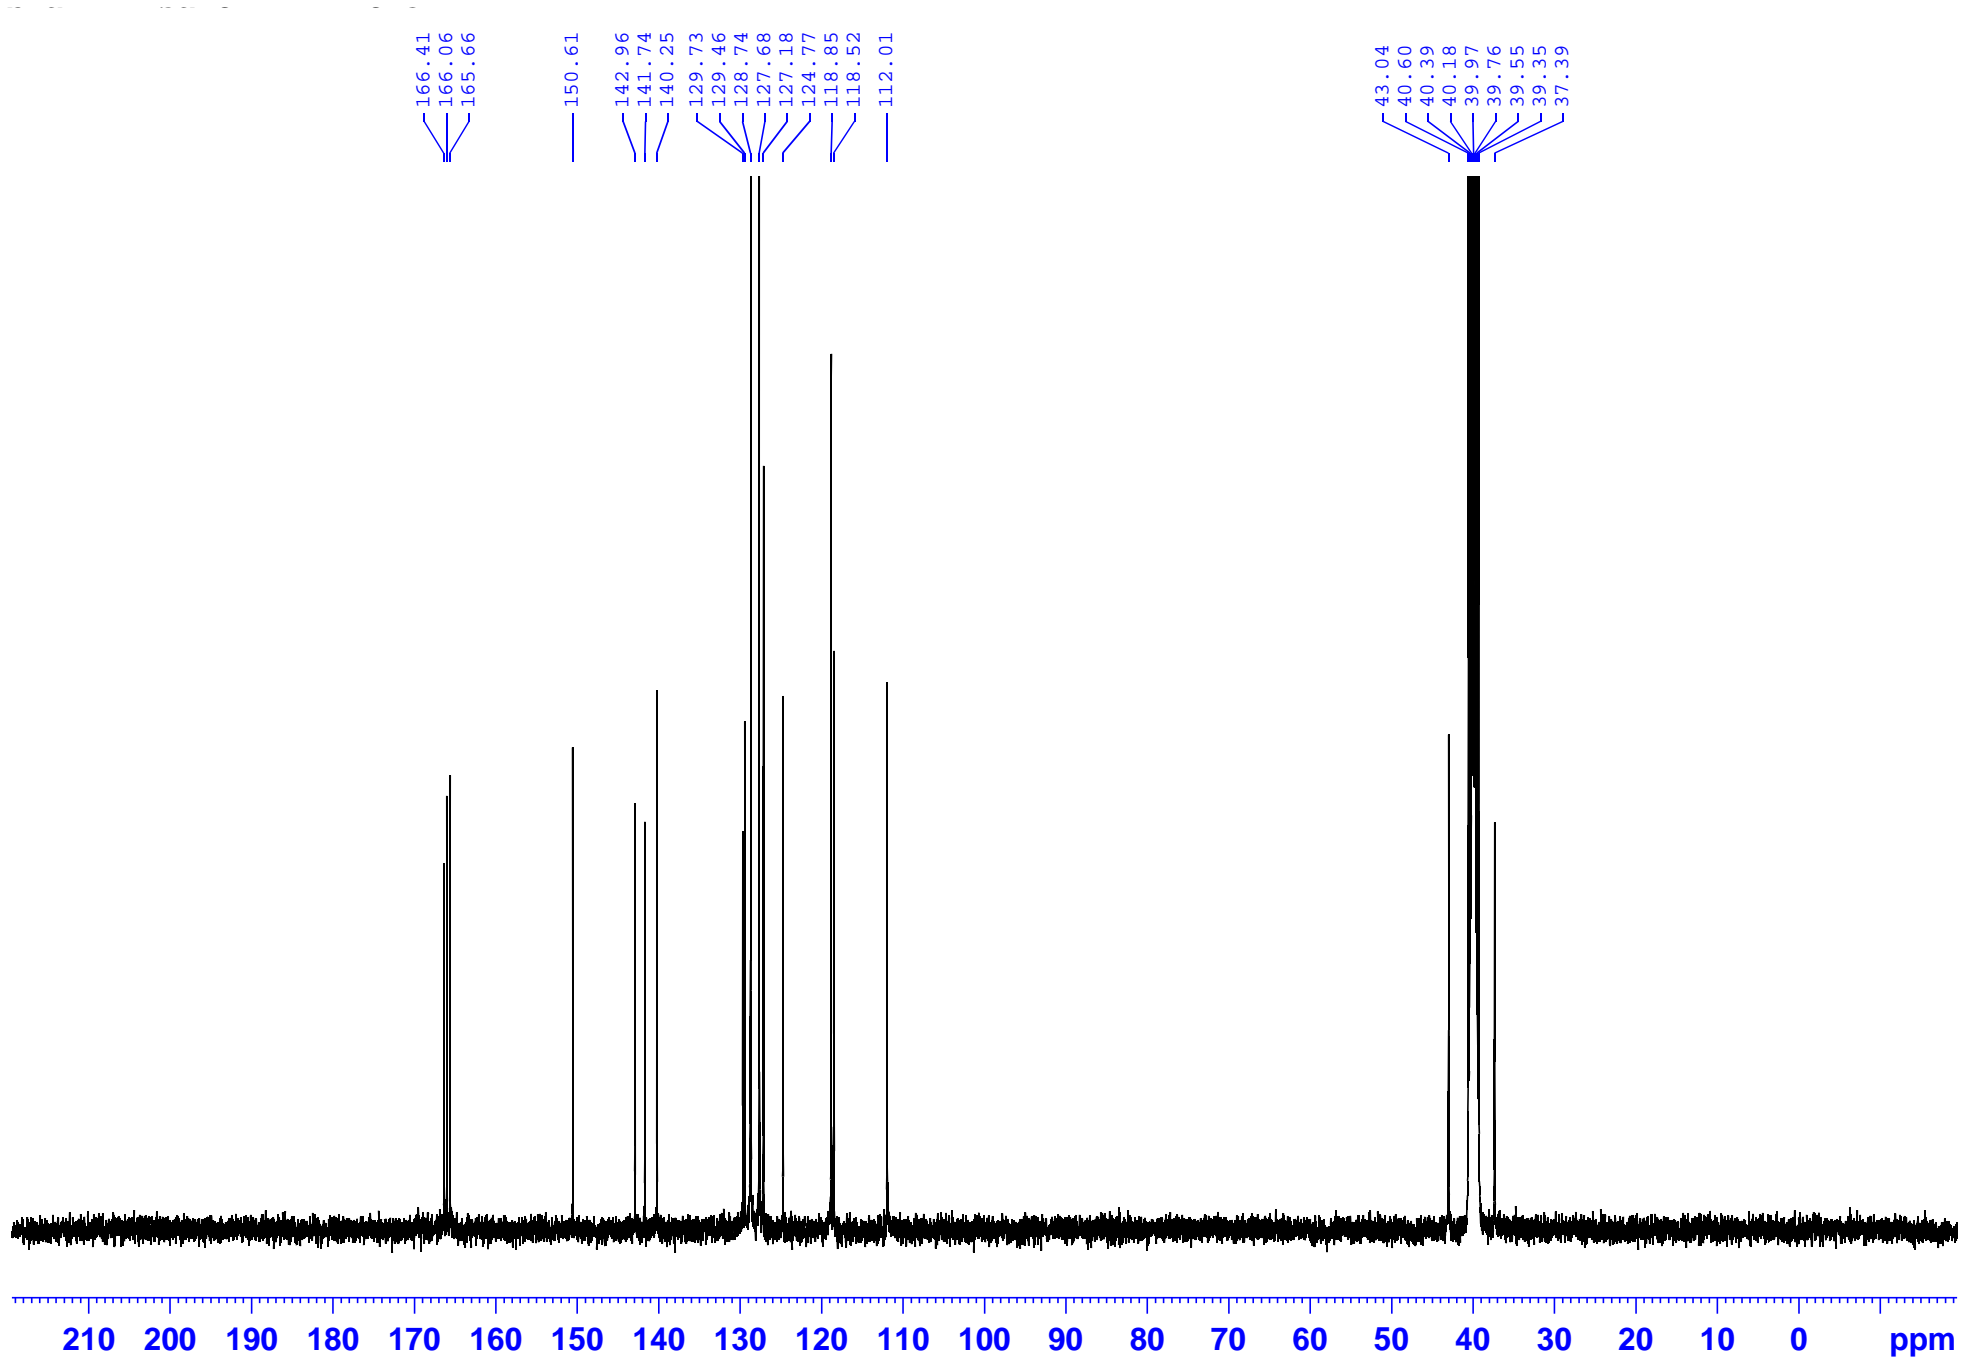

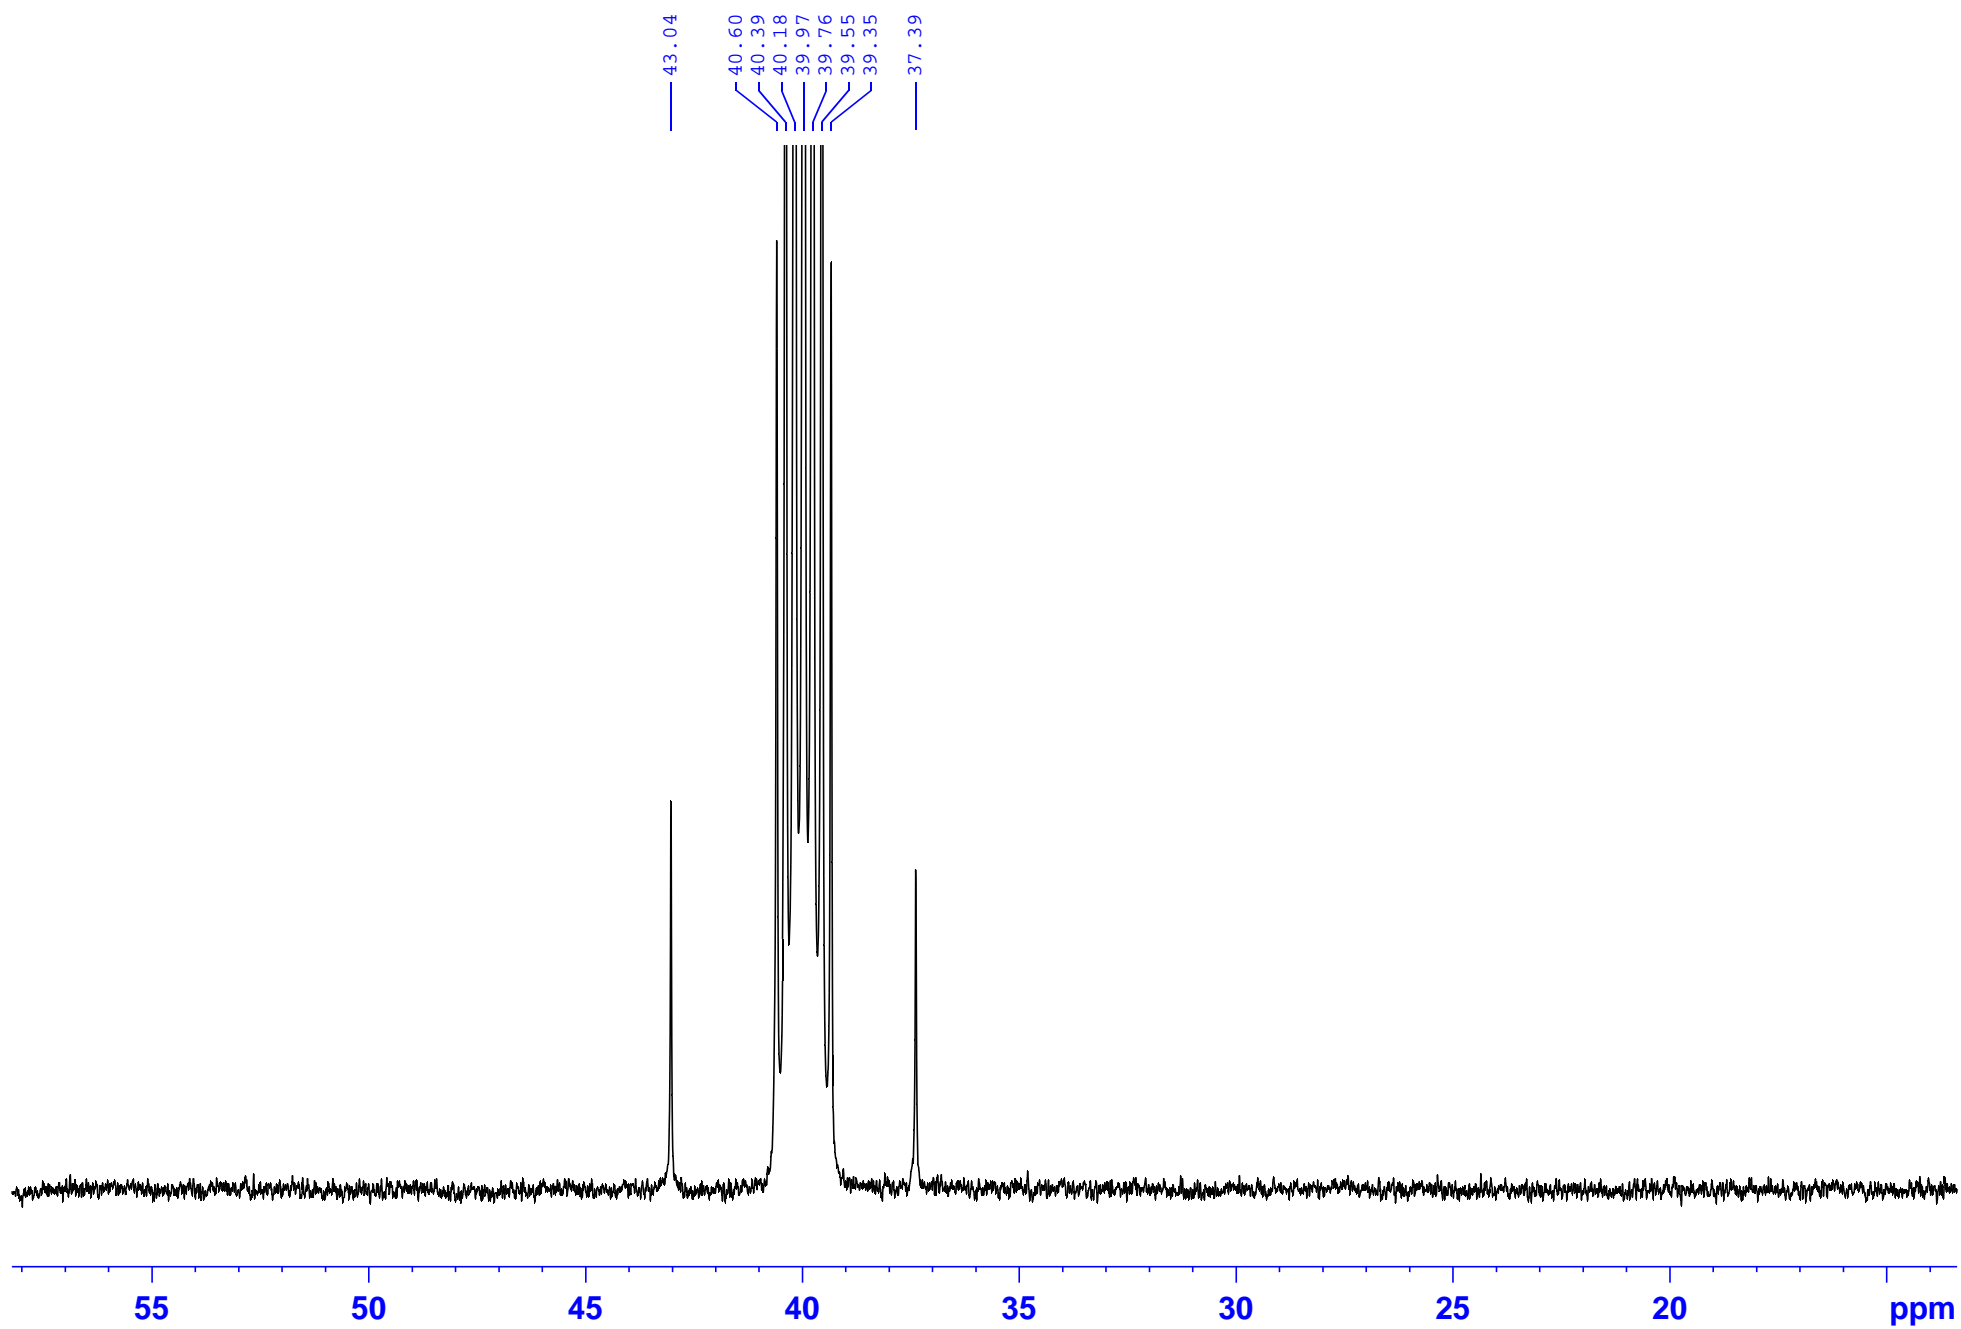



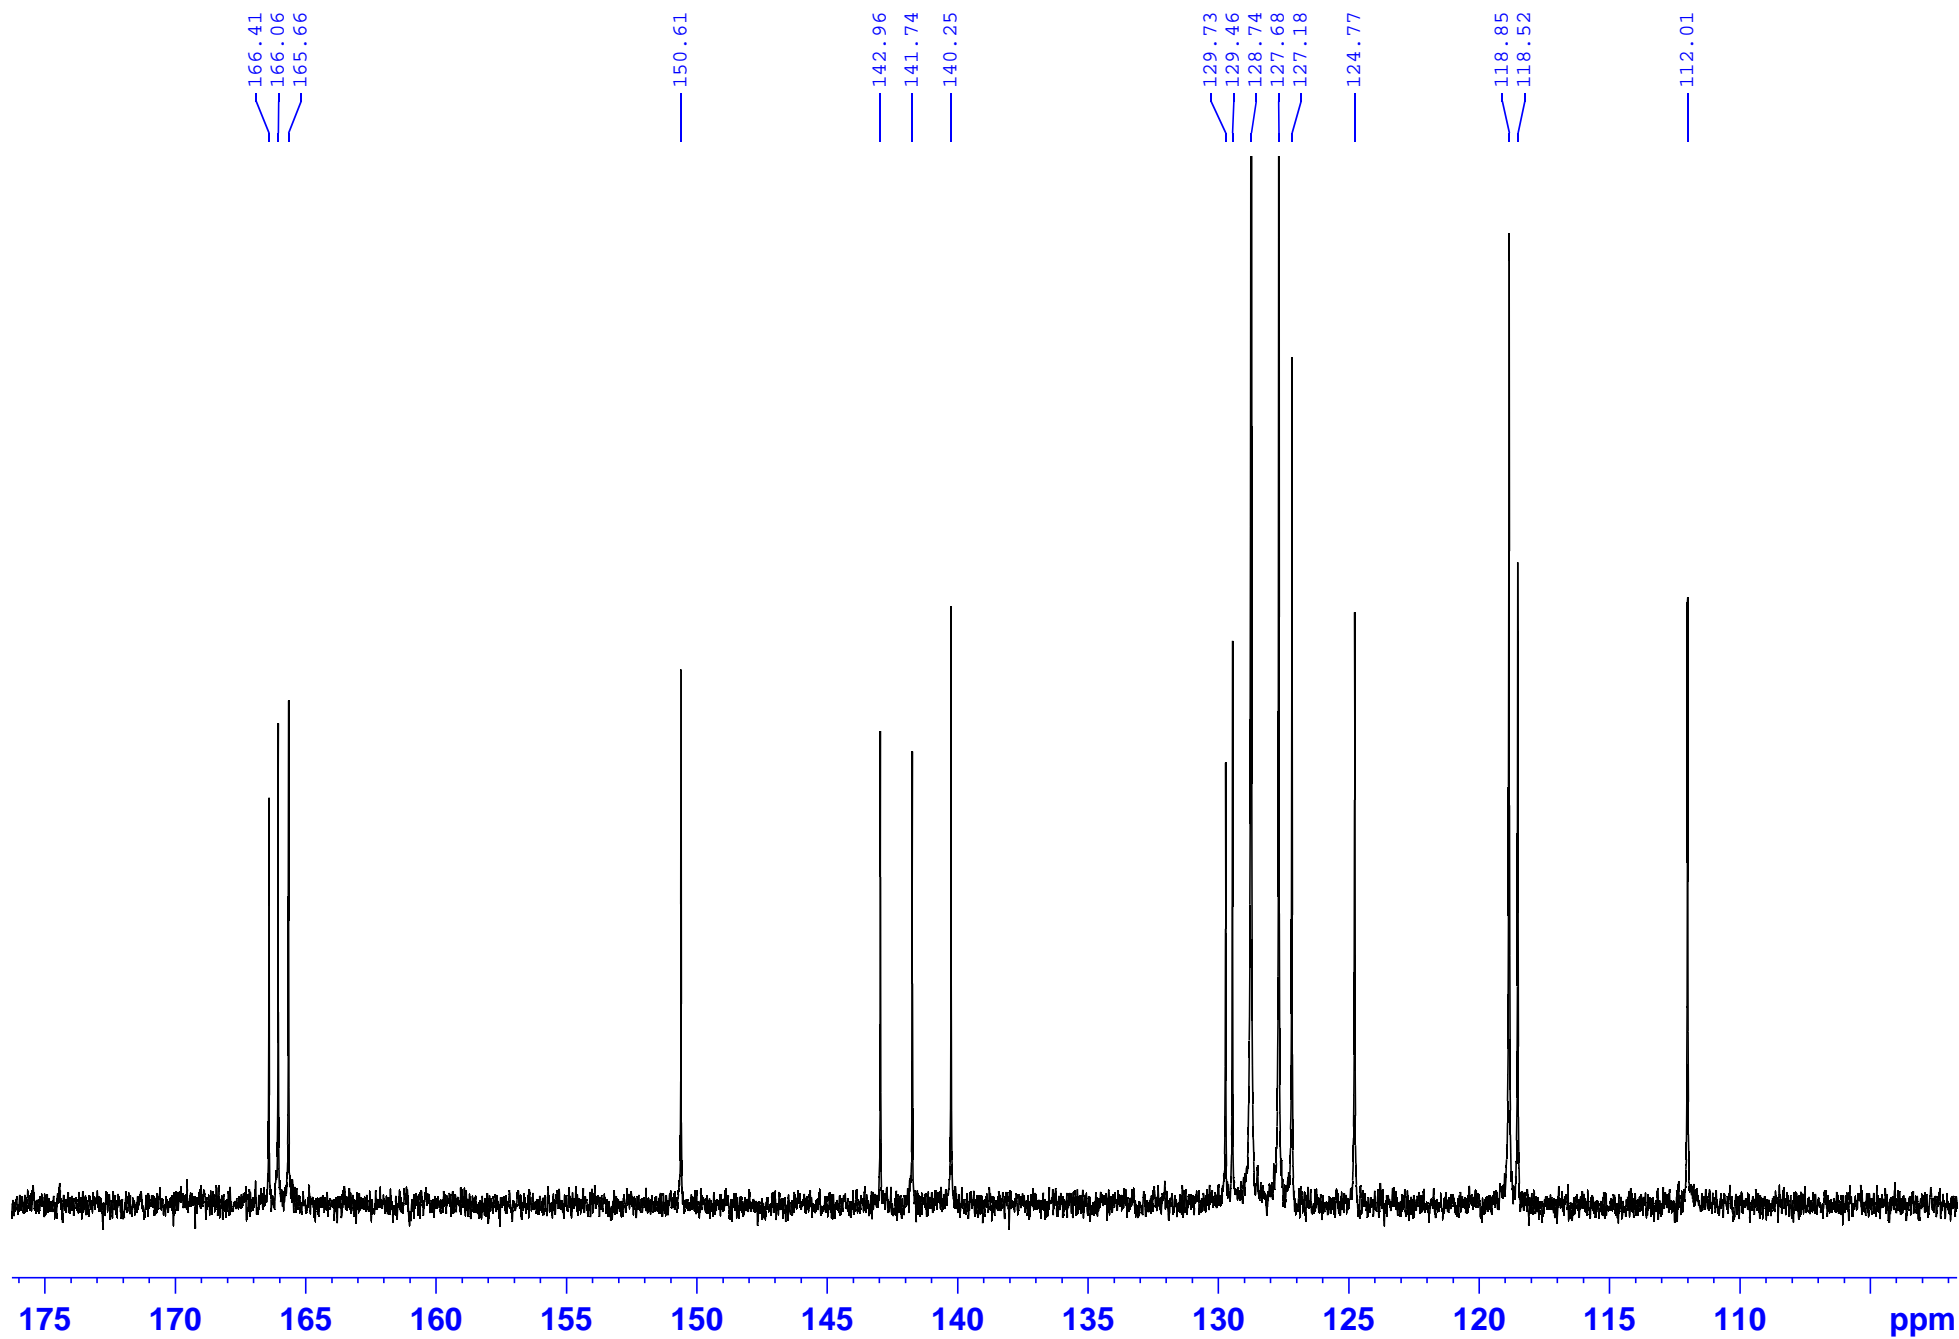

# Cairo University Micro Analytical Center

## DI Analysis Shimadzu Qp-2010 Plus

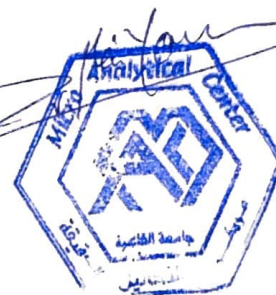

## Sample Information

Analyzed by : Dr. Mai Younis  
 Analyzed : 01/01/2007 10:01:23  
 Sample Name : 12  
 Sample ID :  
 Customer Name : Dr. Radwan Saeed - Pharmacy - Helwan  
 Data File : C:\GCMSsolution\Data\Project1\12.QGD  
 Org Data File : C:\GCMSsolution\Data\Project1\12.QGD  
 Method File : C:\GCMSsolution\Data\Project1\High Temperature Op  
 Org Method File : C:\GCMSsolution\Data\Project1\High Temperature Op  
 Report File :  
 Tuning File : C:\GCMSsolution\System\Tune1\\_default.qgt  
 \$EndIf\$Modified by : Dr. Mai Younis  
 Modified : 01/01/2007 10:05:40

## Method

Analytical Line 1  
 IonSourceTemp : 250.00 °C  
 [MS Table]  
 --Group 1 - Event 1--  
 Start Time : 0.00min  
 End Time : 10.00min  
 ACQ Mode : Scan  
 Event Time : 0.50sec  
 Scan Speed : 1250  
 Start m/z : 50.00  
 End m/z : 600.00

Electron Voltage : 70 eV  
 Ionization Mode : EI

C:\GCMSsolution\Data\Project1\12.QGD

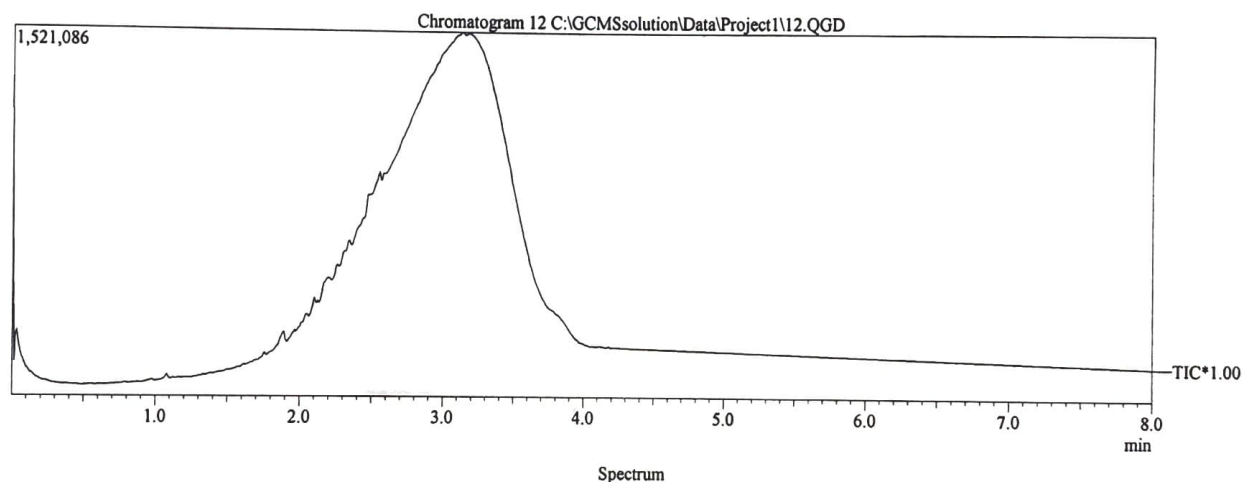

Line#:1 R.Time:3.2(Scan#:386)

MassPeaks:264

RawMode:Single 3.2(386) BasePeak:91(160091)

BG Mode:None Group 1 - Event 1

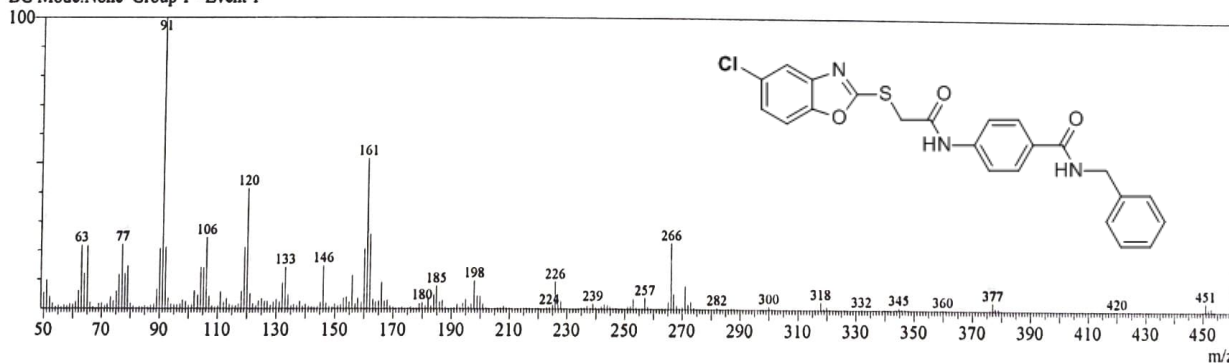

## Mass Table

Line#:1 R.Time:3.2(Scan#:386)

MassPeaks:264

RawMode:Single 3.2(386) BasePeak:91(160091)

BG Mode:None Group 1 - Event 1

| # | m/z   | Abs. In | Rel. Int. | # | m/z   | Abs. In | Rel. Int. | # | m/z   | Abs. In | Rel. Int. |
|---|-------|---------|-----------|---|-------|---------|-----------|---|-------|---------|-----------|
| 1 | 50.00 | 8790    | 5.49      | 4 | 53.00 | 3142    | 1.96      | 7 | 56.05 | 989     | 0.62      |
| 2 | 50.95 | 15820   | 9.88      | 5 | 54.05 | 1298    | 0.81      | 8 | 57.05 | 2086    | 1.30      |
| 3 | 52.00 | 6790    | 4.24      | 6 | 55.05 | 2061    | 1.29      | 9 | 58.00 | 1793    | 1.12      |

# IR of compound 8k

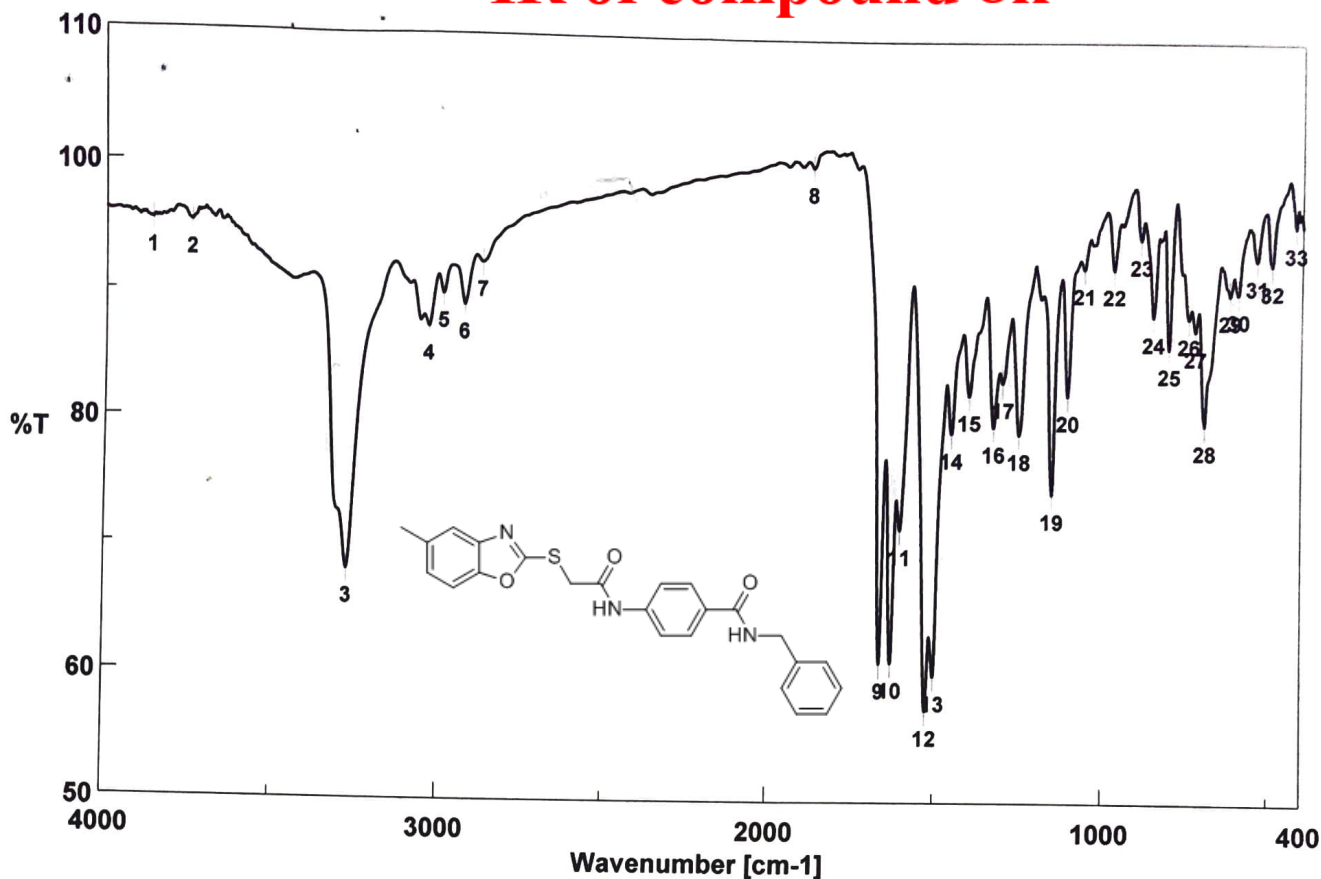

Accumulation 16  
 Resolution 4 cm-1  
 Zero Filling ON  
 Apodization Cosine  
 Gain Auto (2)  
 Scanning Speed Auto (2 mm/sec)  
 Date/Time 8/22/2021 2:03PM  
 Update 8/22/2021 2:06PM  
 Operator IR  
 File Name Memory#122  
 Sample Name MBA -11  
 Comment

| No. | cm-1    | %T      | No. | cm-1    | %T      | No. | cm-1    | %T      |
|-----|---------|---------|-----|---------|---------|-----|---------|---------|
| 1   | 3860.79 | 95.437  | 2   | 3743.15 | 95.346  | 3   | 3271.64 | 68.004  |
| 4   | 3029.62 | 87.1391 | 5   | 2986.23 | 89.7323 | 6   | 2923.56 | 88.8649 |
| 7   | 2869.56 | 92.2186 | 8   | 1872.54 | 100.053 | 9   | 1663.3  | 60.9628 |
| 10  | 1630.52 | 61.0304 | 11  | 1605.45 | 71.4592 | 12  | 1525.42 | 57.2578 |
| 13  | 1502.28 | 59.978  | 14  | 1453.1  | 79.0838 | 15  | 1400.07 | 82.1058 |
| 16  | 1326.79 | 79.6118 | 17  | 1299.79 | 83.1353 | 18  | 1251.58 | 79.0351 |
| 19  | 1152.26 | 74.334  | 20  | 1105.98 | 82.1051 | 21  | 1057.76 | 92.2179 |
| 22  | 968.09  | 92.1838 | 23  | 887.095 | 94.5568 | 24  | 848.525 | 88.443  |
| 25  | 800.314 | 85.9075 | 26  | 741.496 | 88.3009 | 27  | 721.247 | 87.3219 |
| 28  | 692.32  | 79.8409 | 29  | 618.074 | 90.1969 | 30  | 593.004 | 90.289  |
| 31  | 537.078 | 92.9469 | 32  | 491.759 | 92.5476 | 33  | 421.37  | 95.5738 |

فانوس  
 هادي

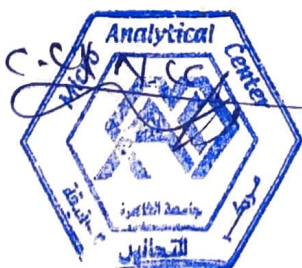

# <sup>1</sup>H NMR of compound 8k



Current Data Parameters  
NAME ebrahim essa -CBA11-RR-hnmr  
EXPNO 11  
PROCNO 1

F2 - Acquisition Parameters  
Date\_ 20220110  
Time 11.45 h  
INSTRUM spect  
PROBHD Z108618\_0945  
PULPROG zg30  
TD 65536  
SOLVENT DMSO  
NS 16  
DS 2  
SWH 8012.820 Hz  
FIDRES 0.244532 Hz  
AQ 4.0894465 sec  
RG 60.97  
DW 62.400 usec  
DE 6.50 usec  
TE 295.1 K  
D1 1.00000000 sec  
TD0 1  
SFO1 400.2024712 MHz  
NUC1 1H  
P1 13.50 usec  
PLW1 13.00000000 W

F2 - Processing parameters  
SI 65536  
SF 400.2000000 MHz  
WDW EM  
SSB 0  
LB 0.30 Hz  
GB 0  
PC 1.00

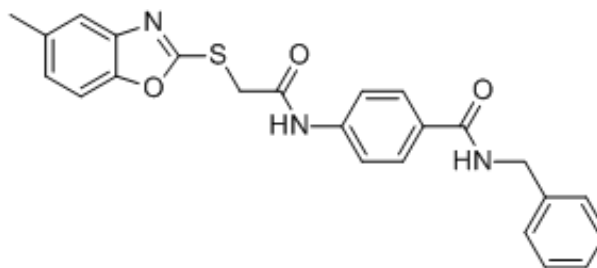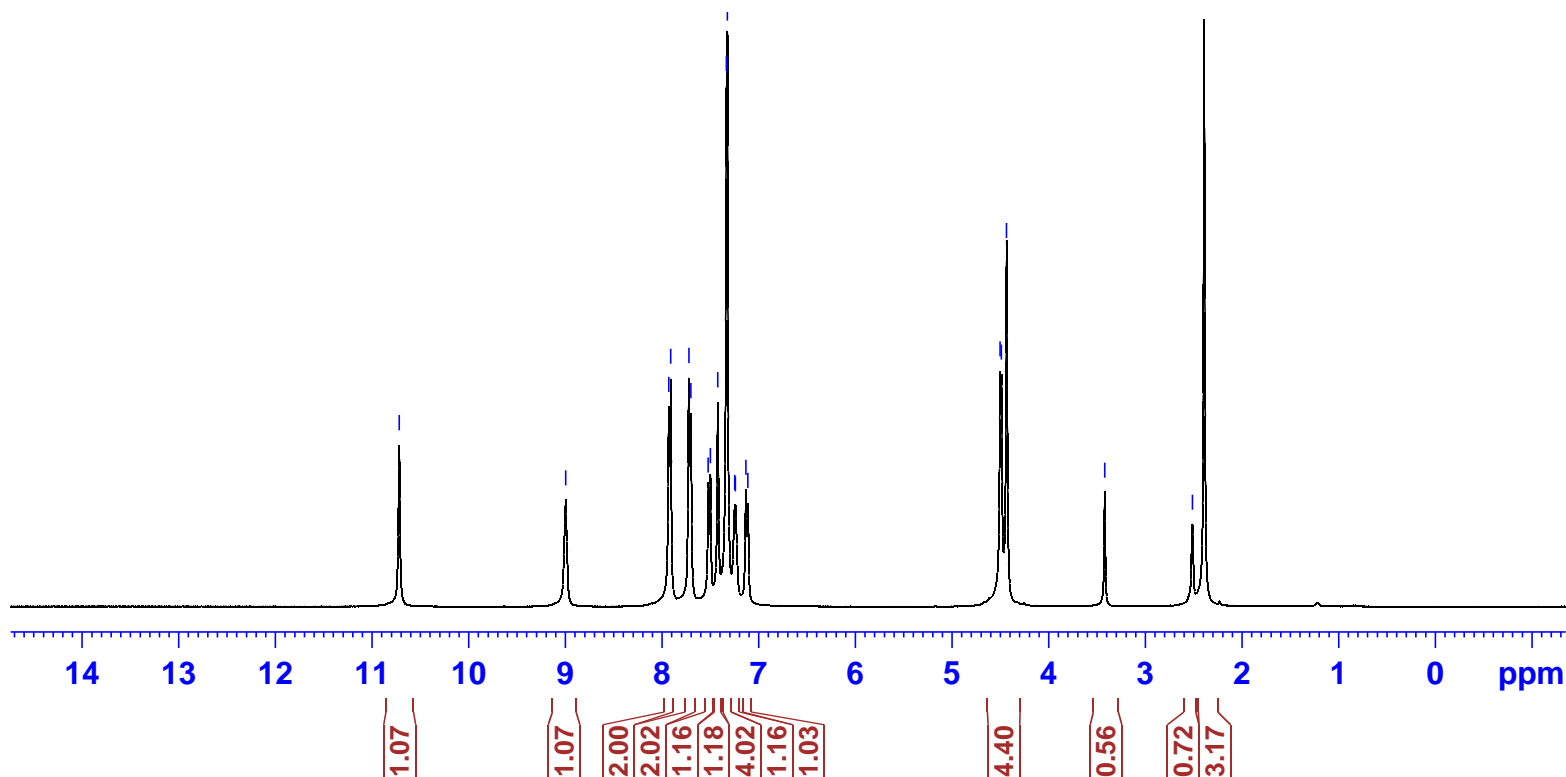

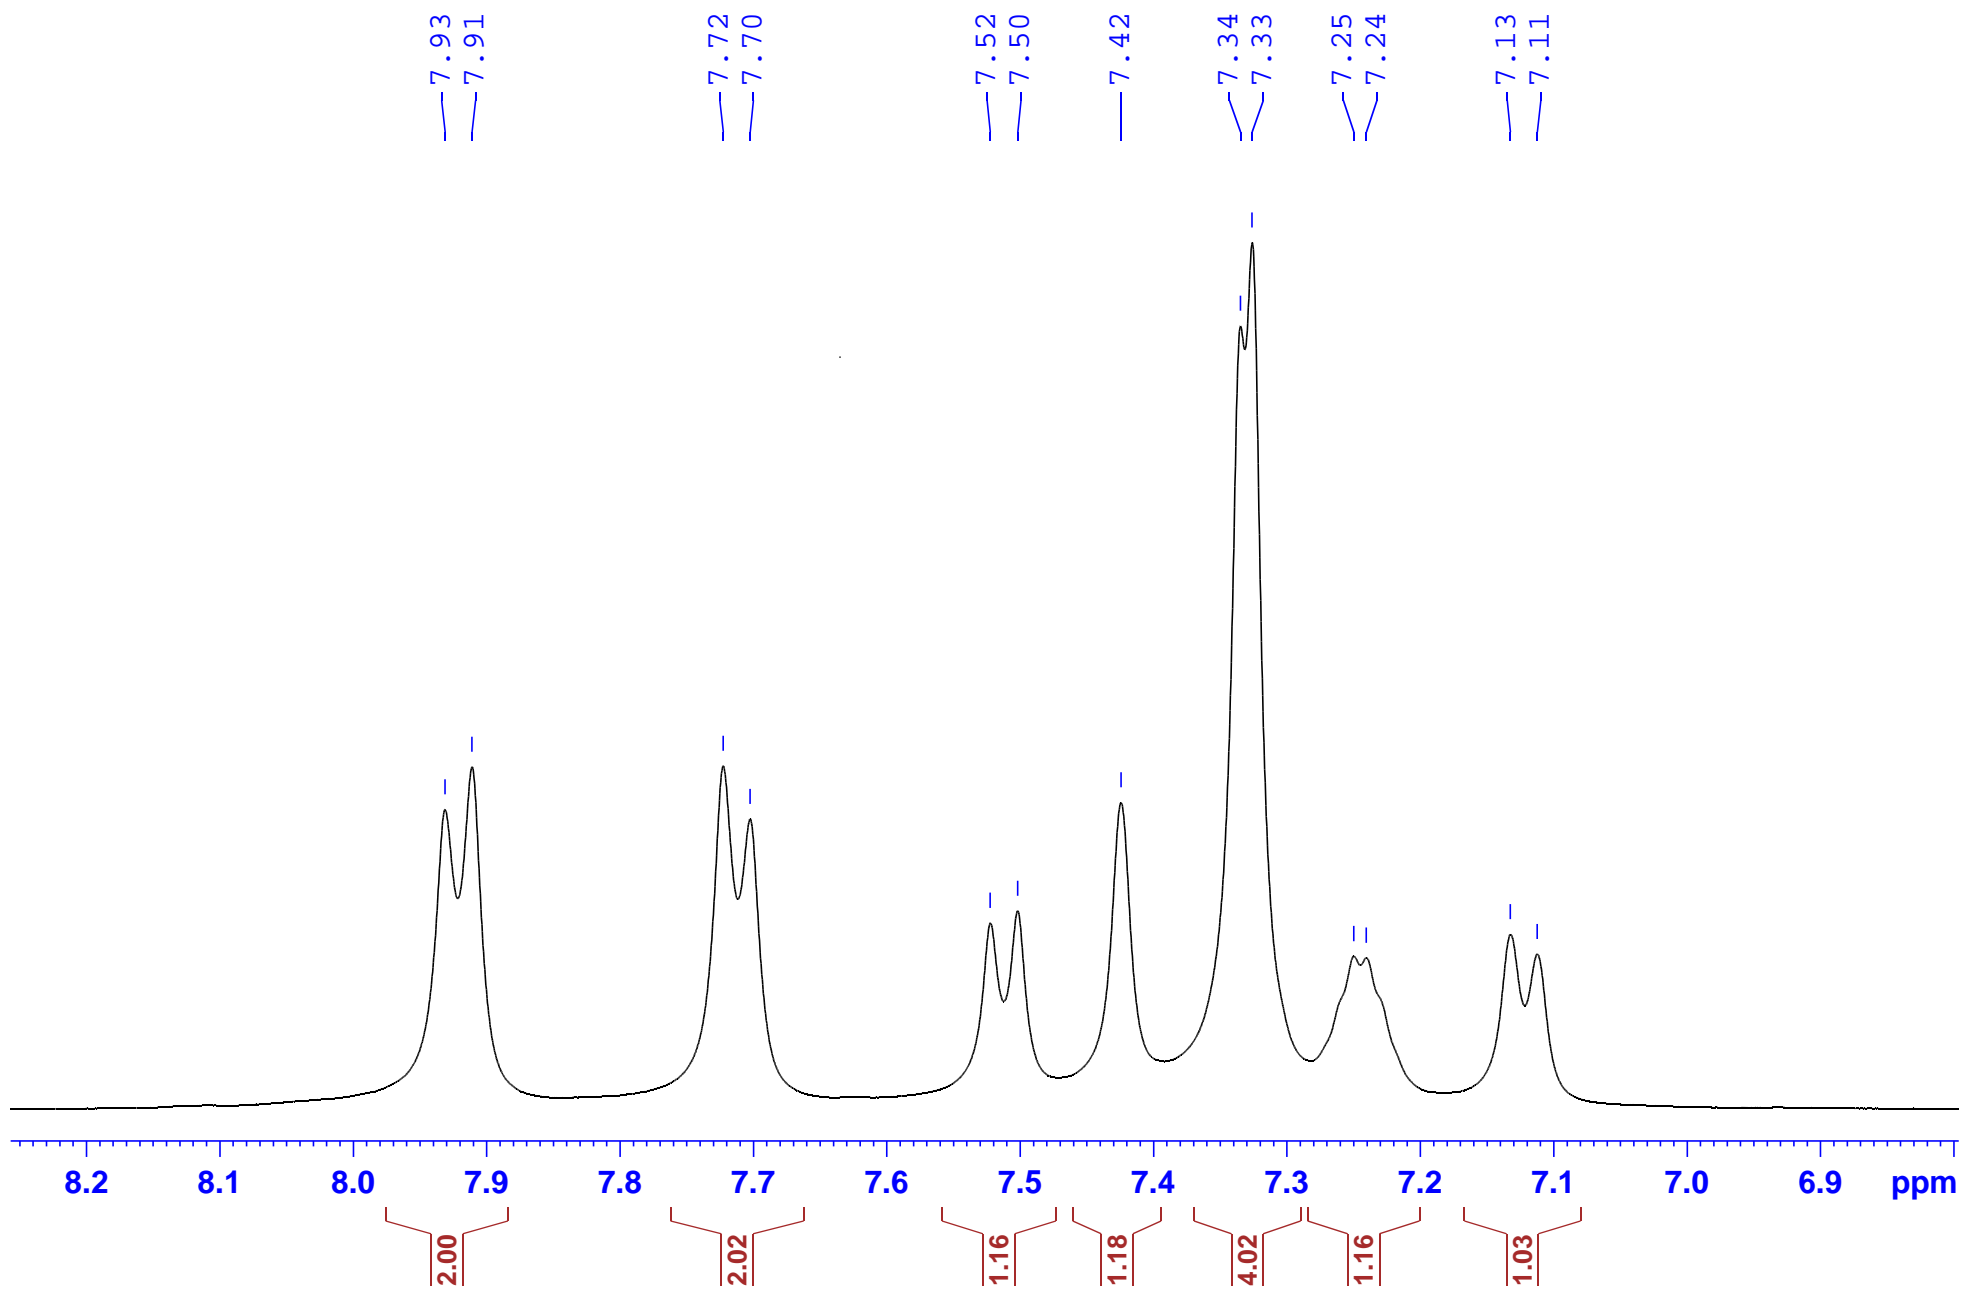

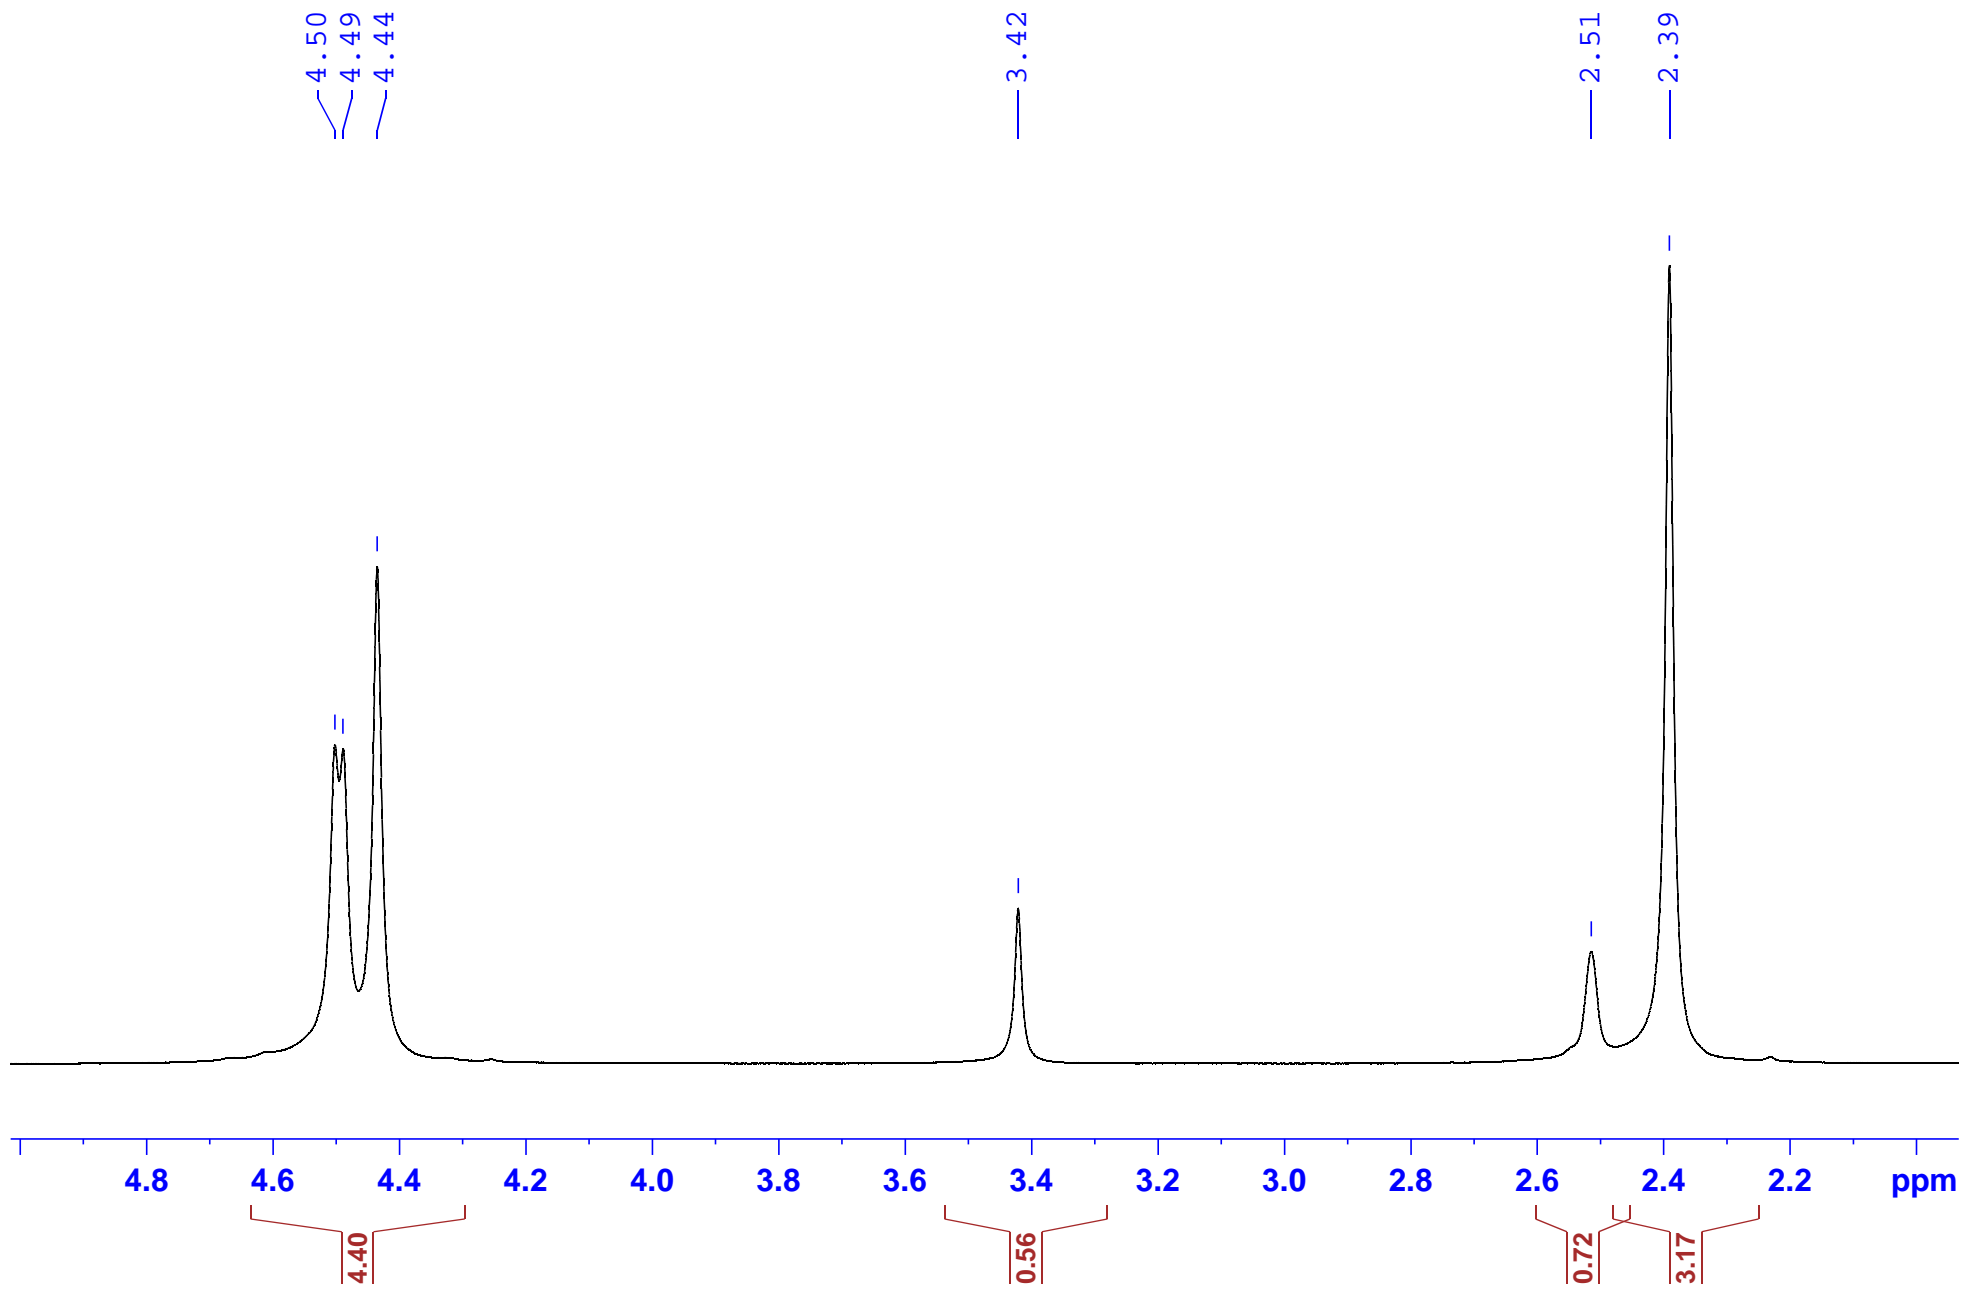

# Cairo University Micro Analytical Center

## DI Analysis Shimadzu Qp-2010 Plus

## Sample Information

Analyzed by : Dr. Mai Younis  
 Analyzed : 01/01/2007 10:11:59  
 Sample Name : 13  
 Sample ID :  
 Customer Name : Dr. Radwan Saeed - Pharmacy - Helwan  
 Data File : C:\GCMSsolution\Data\Project1\13.QGD  
 Org Data File : C:\GCMSsolution\Data\Project1\13.QGD  
 Method File : C:\GCMSsolution\Data\Project1\High Temperature Op  
 Org Method File : C:\GCMSsolution\Data\Project1\High Temperature Op  
 Report File :  
 Tuning File : C:\GCMSsolution\System\Tune1\\_default.qgt  
 \$EndIf\$Modified by : Dr. Mai Younis  
 Modified : 01/01/2007 10:18:41

## Method

Analytical Line 1  
 IonSourceTemp : 250.00 °C  
 [MS Table]  
 --Group 1 - Event 1--  
 Start Time : 0.00min  
 End Time : 10.00min  
 ACQ Mode : Scan  
 Event Time : 0.50sec  
 Scan Speed : 1250  
 Start m/z : 50.00  
 End m/z : 600.00

Electron Voltage : 70 eV  
 Ionization Mode : EI

C:\GCMSsolution\Data\Project1\13.QGD

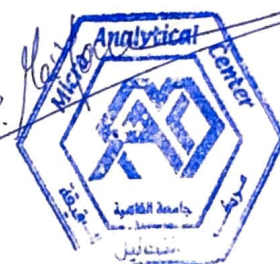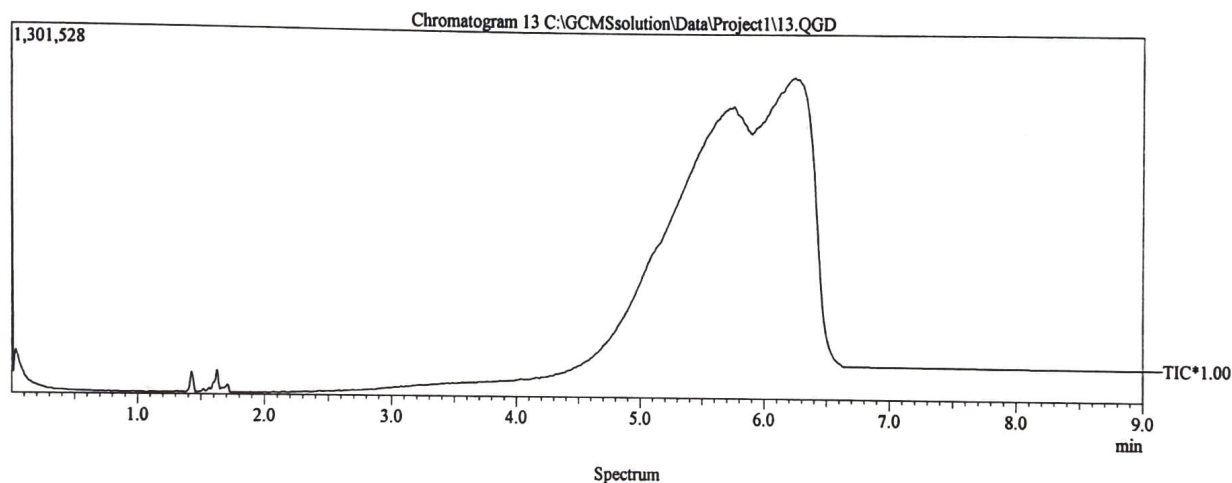

Line#:1 R.Time:6.3(Scan#:751)

MassPeaks:203

RawMode:Single 6.3(751) BasePeak:91(140361)

BG Mode:None Group 1 - Event 1

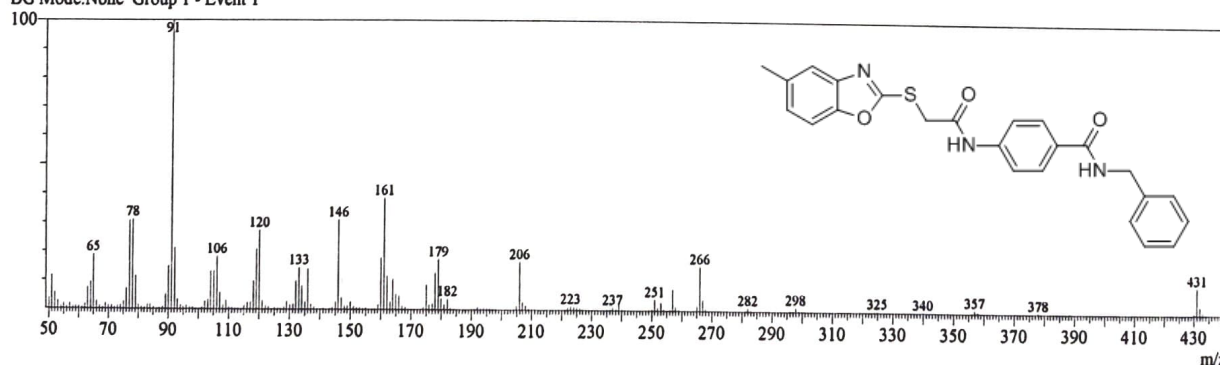

## Mass Table

Line#:1 R.Time:6.3(Scan#:751)

MassPeaks:203

RawMode:Single 6.3(751) BasePeak:91(140361)

BG Mode:None Group 1 - Event 1

| # | m/z   | Abs. In | Rel. Int. | # | m/z   | Abs. In | Rel. Int. | # | m/z   | Abs. In | Rel. Int. |
|---|-------|---------|-----------|---|-------|---------|-----------|---|-------|---------|-----------|
| 1 | 50.05 | 5269    | 3.75      | 4 | 53.00 | 3791    | 2.70      | 7 | 56.05 | 1098    | 0.78      |
| 2 | 51.00 | 16150   | 11.51     | 5 | 54.05 | 1434    | 1.02      | 8 | 57.05 | 2673    | 1.90      |
| 3 | 52.00 | 7847    | 5.59      | 6 | 55.00 | 2668    | 1.90      | 9 | 58.05 | 1116    | 0.80      |



# IR of compound 8L

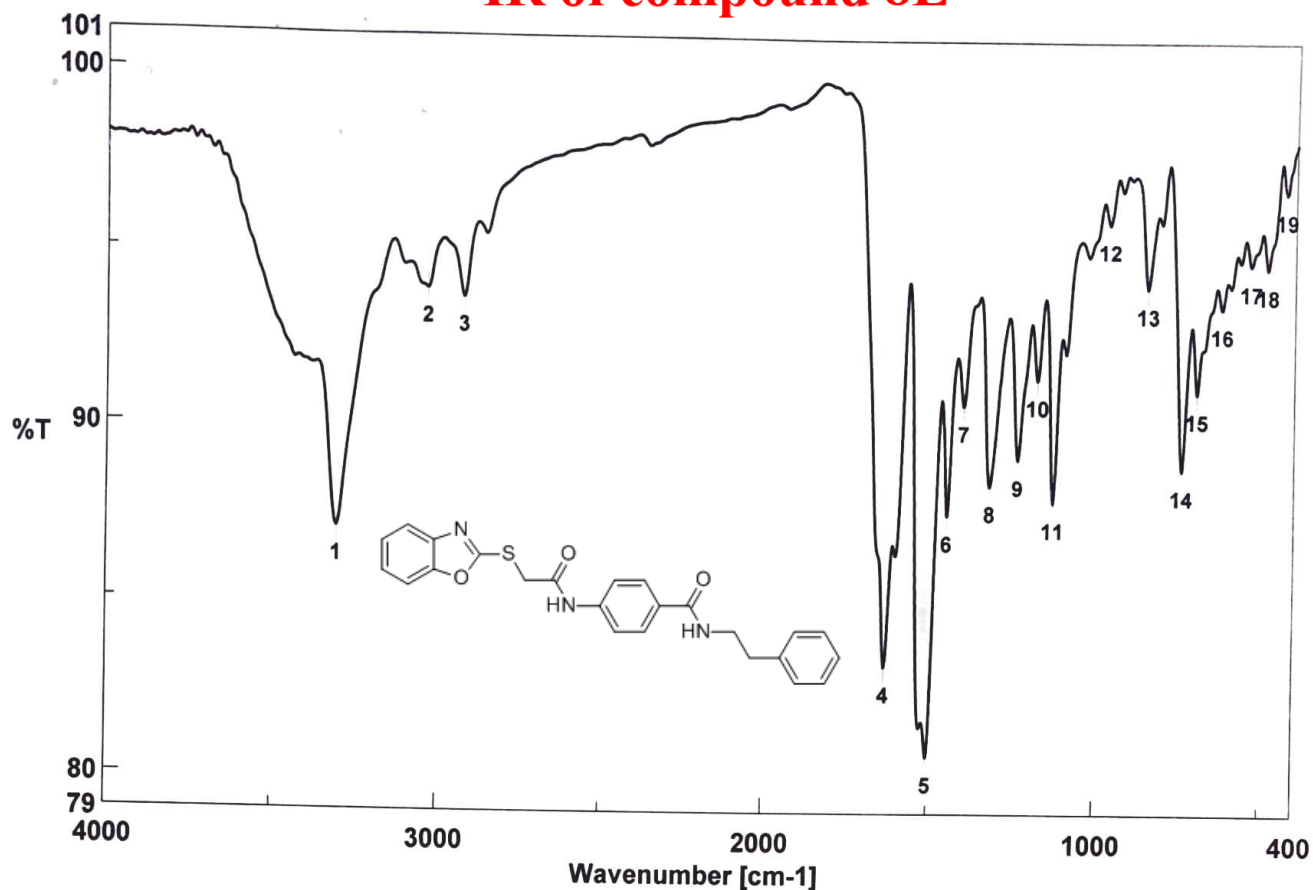

Accumulation 16  
 Resolution 4 cm-1  
 Zero Filling ON  
 Apodization Cosine  
 Gain Auto (2)  
 Scanning Speed Auto (2 mm/sec)  
 Date/Time 8/22/2021 1:46PM  
 Update 8/22/2021 1:46PM  
 Operator IR  
 File Name Memory#76  
 Sample Name PBA -2  
 Comment

| No. | cm-1    | %T      | No. | cm-1    | %T      | No. | cm-1    | %T      |
|-----|---------|---------|-----|---------|---------|-----|---------|---------|
| 1   | 3304.43 | 87.0549 | 2   | 3032.51 | 93.8406 | 3   | 2922.59 | 93.5926 |
| 4   | 1633.41 | 83.1883 | 5   | 1503.24 | 80.6308 | 6   | 1452.14 | 87.4775 |
| 7   | 1403.92 | 90.6033 | 8   | 1323.89 | 88.3232 | 9   | 1240.97 | 89.0809 |
| 10  | 1183.11 | 91.3651 | 11  | 1132.97 | 87.8681 | 12  | 967.126 | 95.875  |
| 13  | 849.49  | 94.0353 | 14  | 743.424 | 88.8239 | 15  | 698.105 | 91.0252 |
| 16  | 623.859 | 93.4779 | 17  | 536.114 | 94.7259 | 18  | 485.009 | 94.629  |
| 19  | 430.048 | 96.8064 |     |         |         |     |         |         |

تحليل  
 طيفي

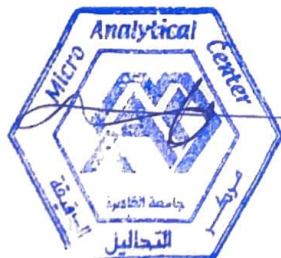



# <sup>1</sup>H NMR of compound 8L

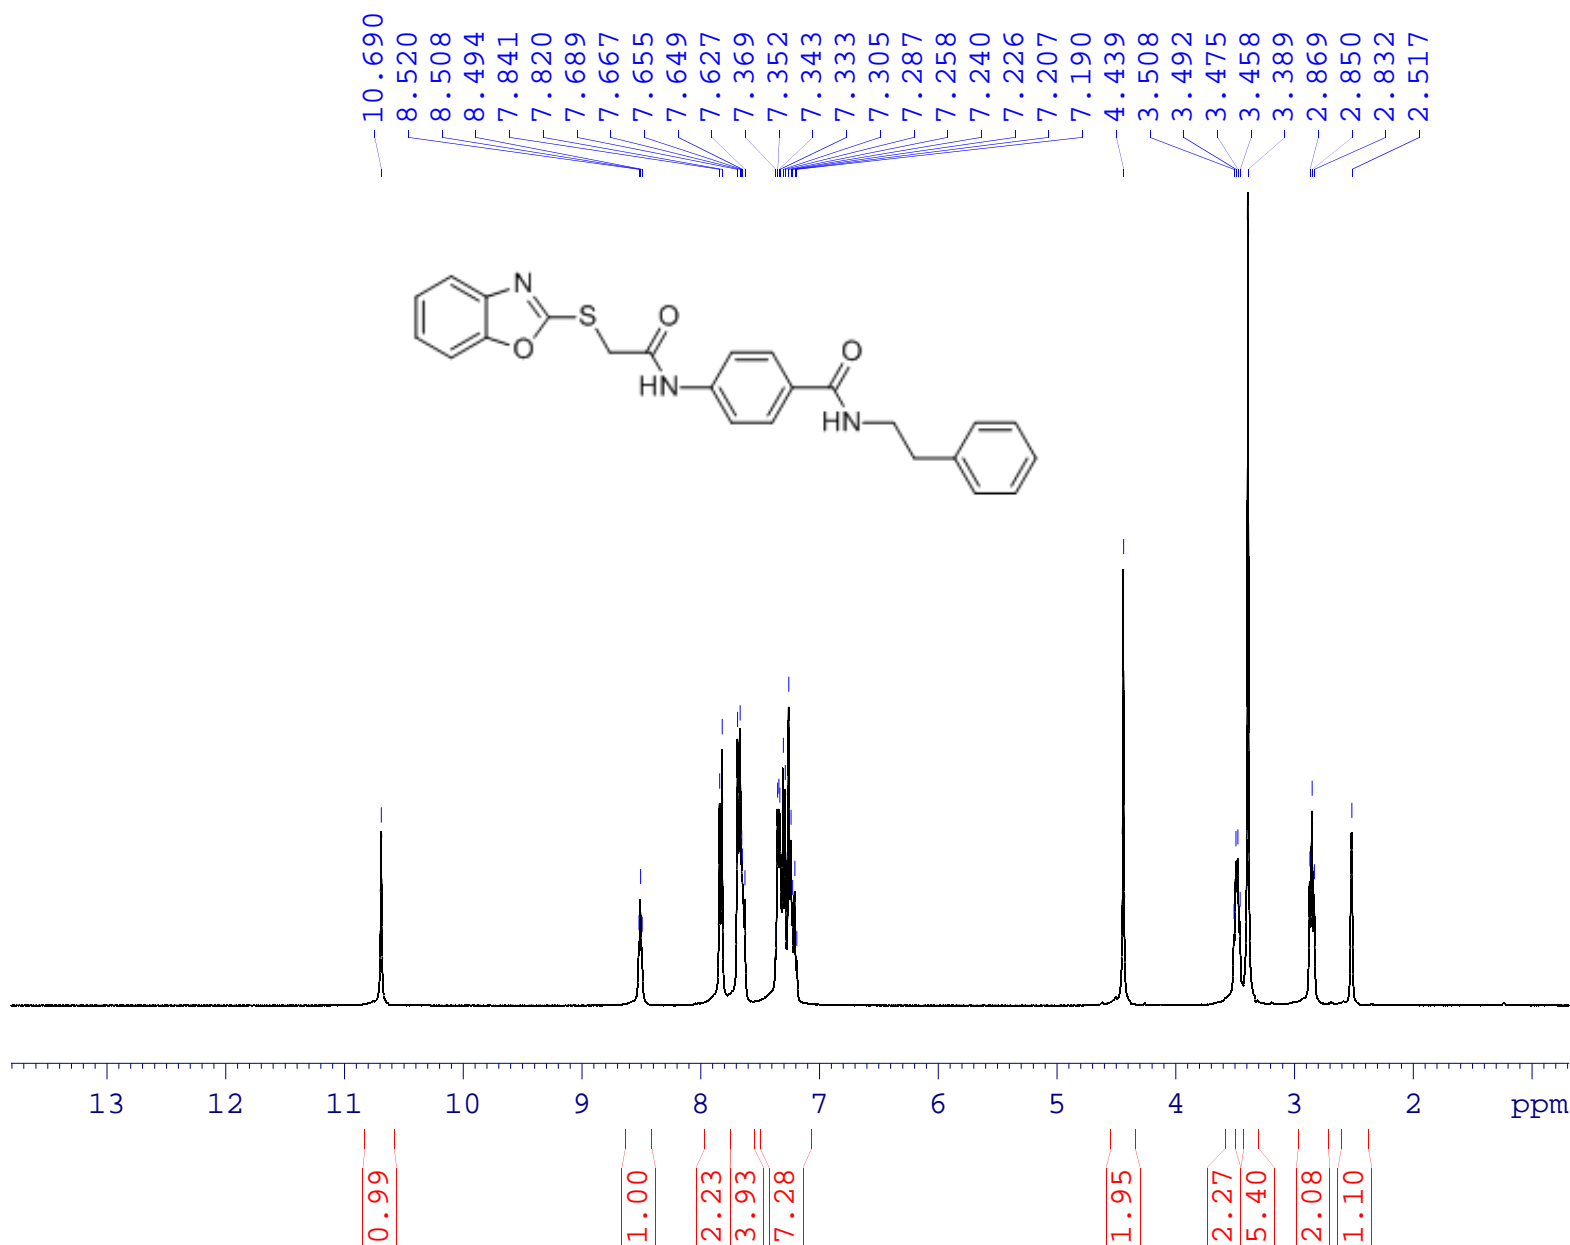

Current Data Parameters  
 NAME Ebrahim Eissa- PBA-2-proton-DMSO-D  
 EXPNO 10  
 PROCNO 1

F2 - Acquisition Parameters  
 Date\_ 20220112  
 Time 8.50 h  
 INSTRUM spect  
 PROBHD Z108618\_0945 (  
 PULPROG zg30  
 TD 65536  
 SOLVENT DMSO  
 NS 16  
 DS 2  
 SWH 8012.820 Hz  
 FIDRES 0.244532 Hz  
 AQ 4.0894465 sec  
 RG 112.56  
 DW 62.400 usec  
 DE 6.50 usec  
 TE 619.5 K  
 D1 1.00000000 sec  
 TD0 1  
 SFO1 400.2024712 MHz  
 NUC1 1H  
 P1 13.50 usec  
 PLW1 13.00000000 W

F2 - Processing parameters  
 SI 65536  
 SF 400.2000000 MHz  
 WDW EM  
 SSB 0  
 LB 0.30 Hz  
 GB 0  
 PC 1.00

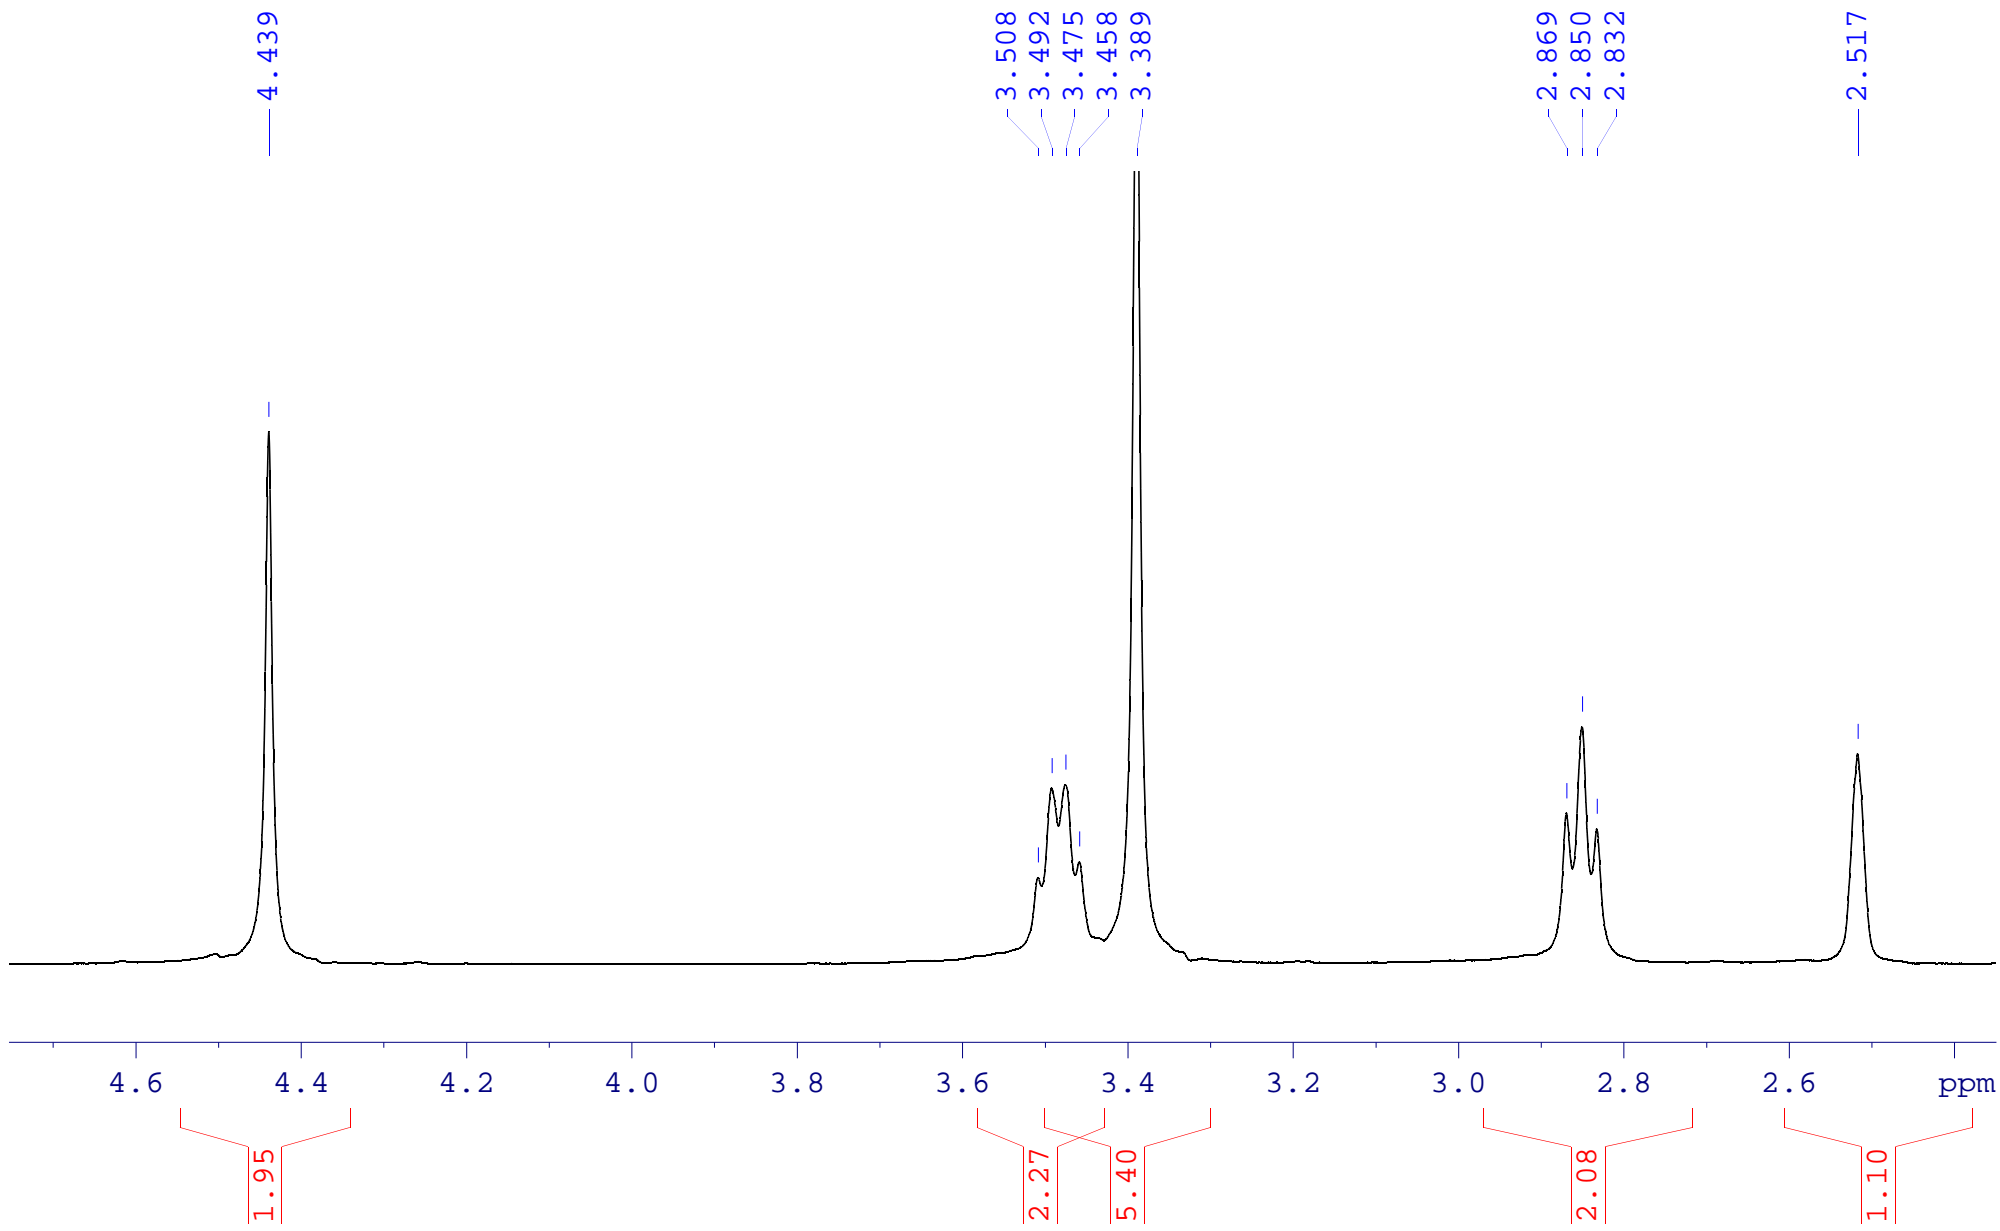

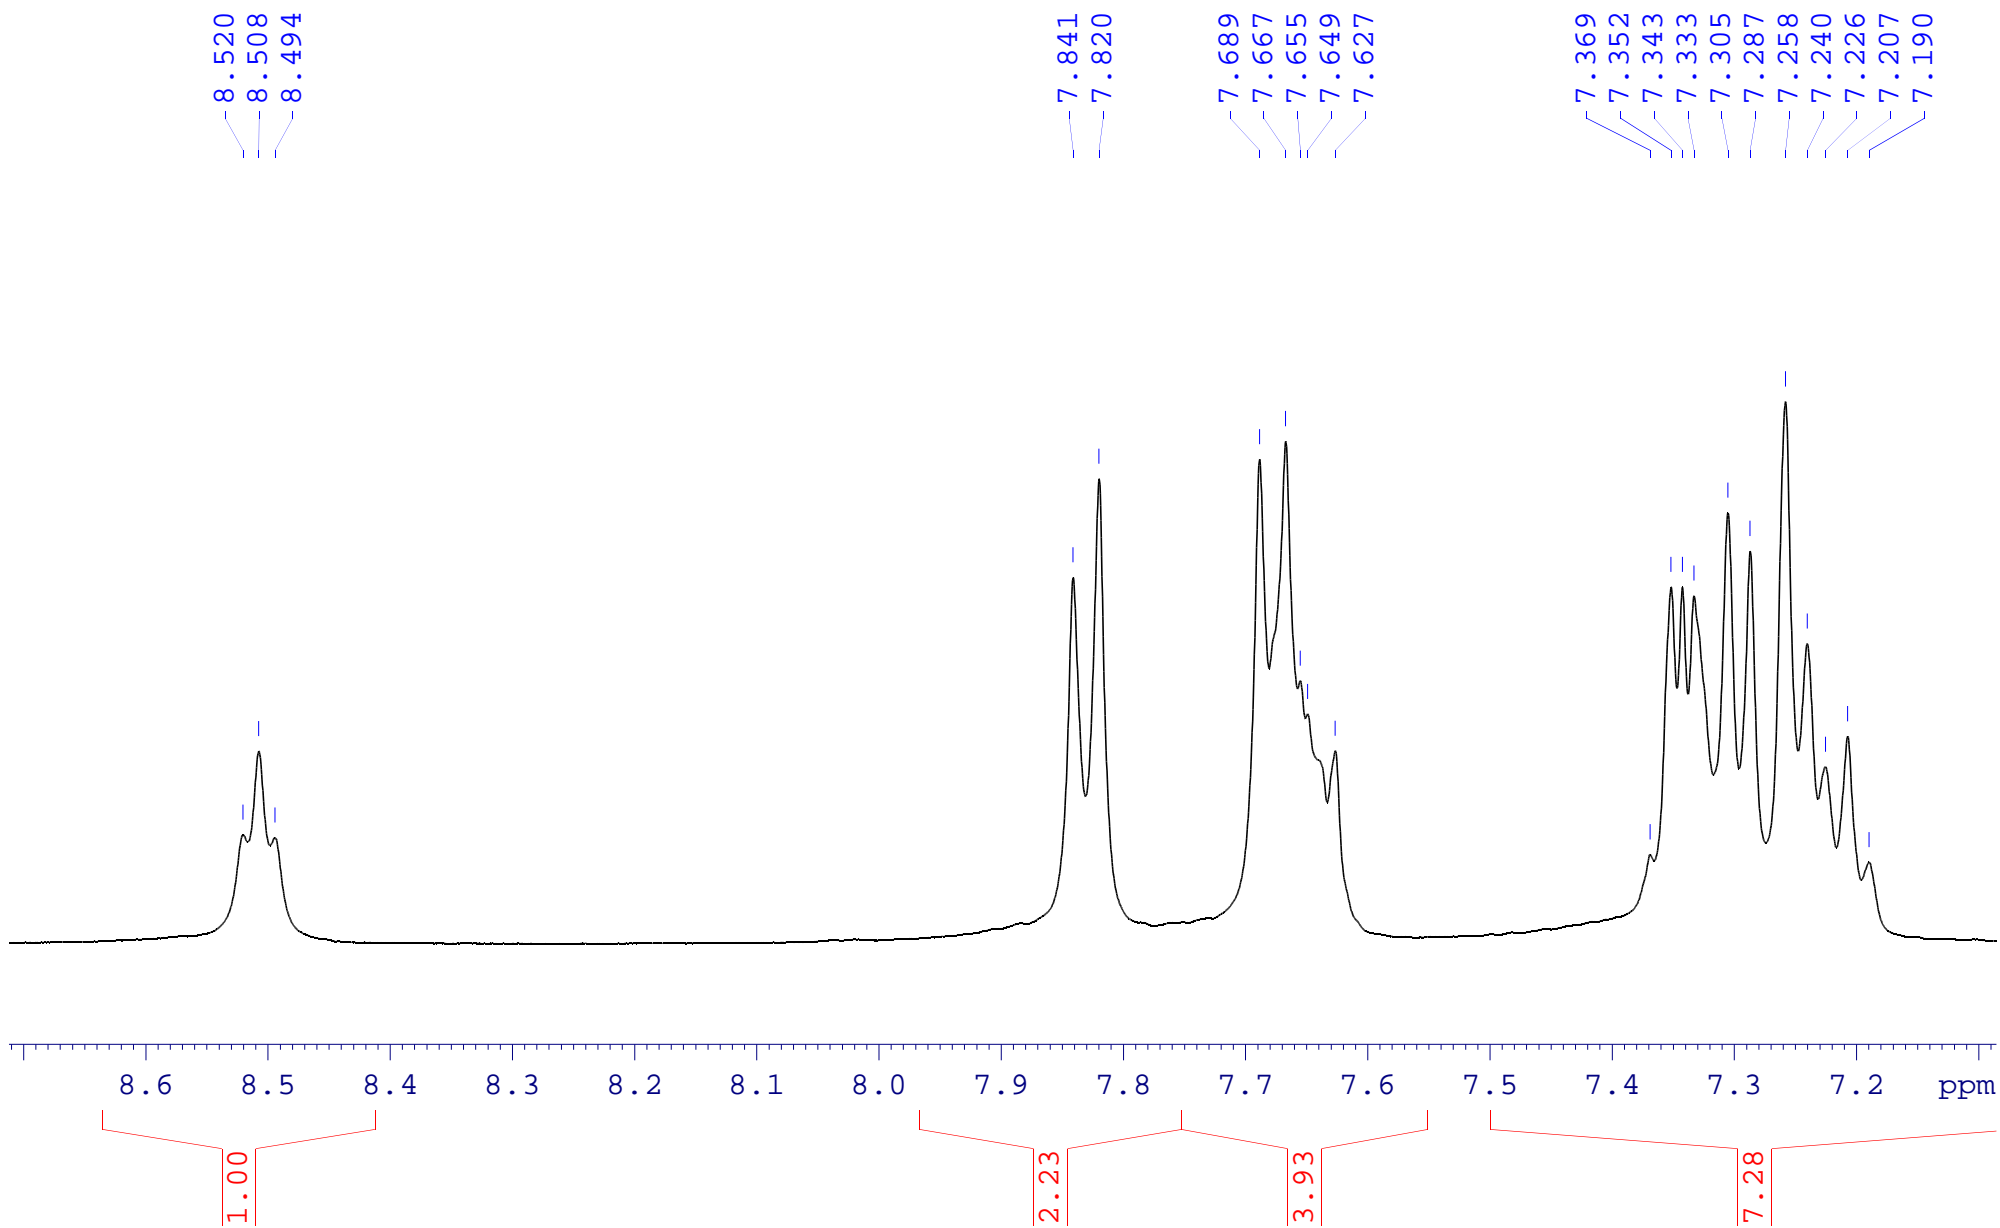

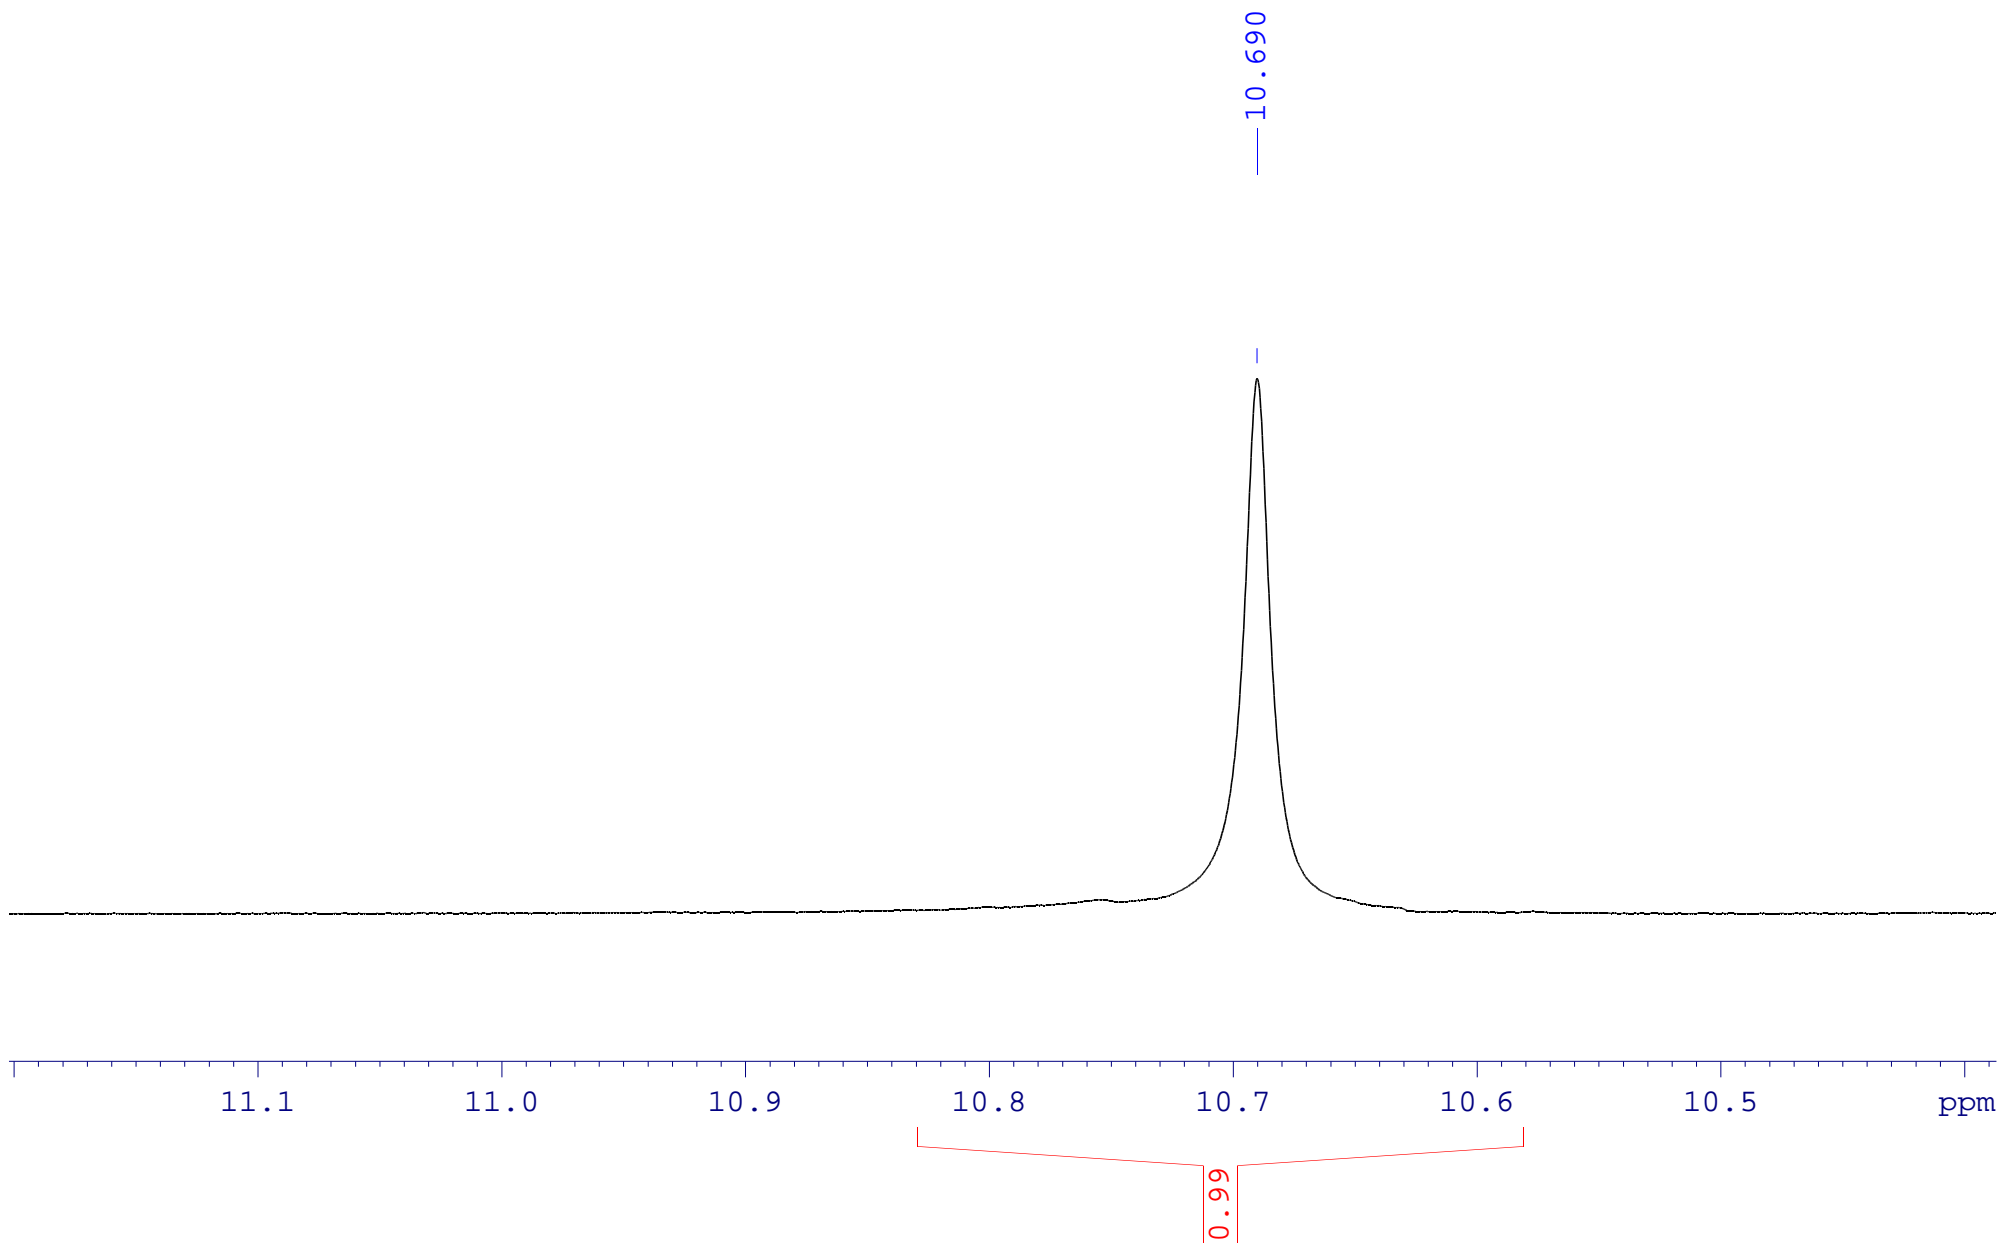

# Cairo University Micro Analytical Center

## DI Analysis Shimadzu Qp-2010 Plus

## Sample Information

Analyzed by : Dr. Mai Younis  
 Analyzed : 01/01/2007 08:41:01 μ  
 Sample Name : 2  
 Sample ID :  
 Customer Name : Dr. Radwan Saeed - Pharmacy - Helwan  
 Data File : C:\GCMSsolution\Data\Project1\2.QGD  
 Org Data File : C:\GCMSsolution\Data\Project1\2.QGD  
 Method File : C:\GCMSsolution\Data\Project1\High Temperature Op  
 Org Method File : C:\GCMSsolution\Data\Project1\High Temperature Op  
 Report File :  
 Tuning File : C:\GCMSsolution\System\Tune1\\_default.qgt  
 \$EndIf\$Modified by : Dr. Mai Younis  
 Modified : 01/01/2007 08:46:56 μ

## Method

Analytical Line 1  
 IonSourceTemp : 250.00 °C  
 [MS Table]  
 --Group 1 - Event 1--  
 Start Time : 0.00min  
 End Time : 10.00min  
 ACQ Mode : Scan  
 Event Time : 0.50sec  
 Scan Speed : 1250  
 Start m/z : 50.00  
 End m/z : 600.00

Electron Voltage : 70 eV  
 Ionization Mode : EI

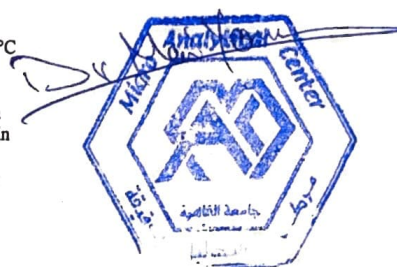

C:\GCMSsolution\Data\Project1\2.QGD

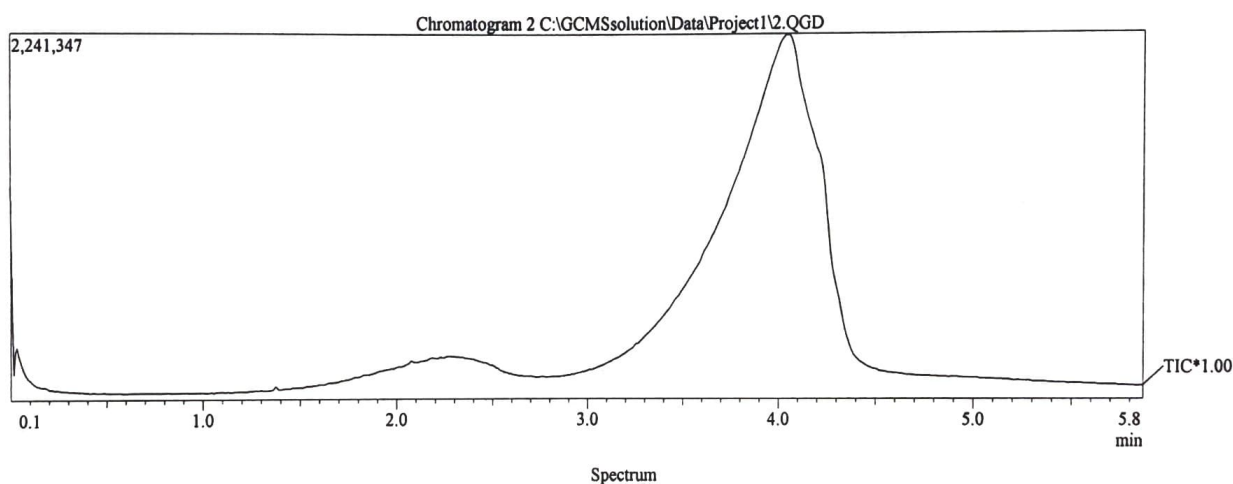

Line#:1 R.Time:4.0(Scan#:487)

MassPeaks:221

RawMode:Single 4.0(487) BasePeak:120(249470)

BG Mode:None Group 1 - Event 1

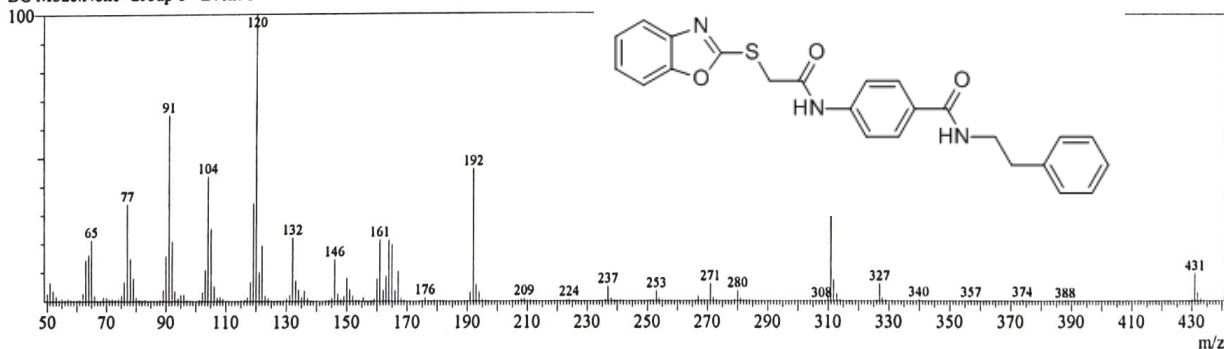

## Mass Table

Line#:1 R.Time:4.0(Scan#:487)

MassPeaks:221

RawMode:Single 4.0(487) BasePeak:120(249470)

BG Mode:None Group 1 - Event 1

| # | m/z   | Abs. In | Rel. Int. | # | m/z   | Abs. In | Rel. Int. | # | m/z   | Abs. In | Rel. Int. |
|---|-------|---------|-----------|---|-------|---------|-----------|---|-------|---------|-----------|
| 1 | 50.05 | 6510    | 2.61      | 4 | 53.00 | 3802    | 1.52      | 7 | 56.05 | 1293    | 0.52      |
| 2 | 51.00 | 16193   | 6.49      | 5 | 54.05 | 1408    | 0.56      | 8 | 57.05 | 2154    | 0.86      |
| 3 | 52.00 | 9186    | 3.68      | 6 | 55.00 | 2238    | 0.90      | 9 | 58.00 | 1604    | 0.64      |

# IR of compound 8m

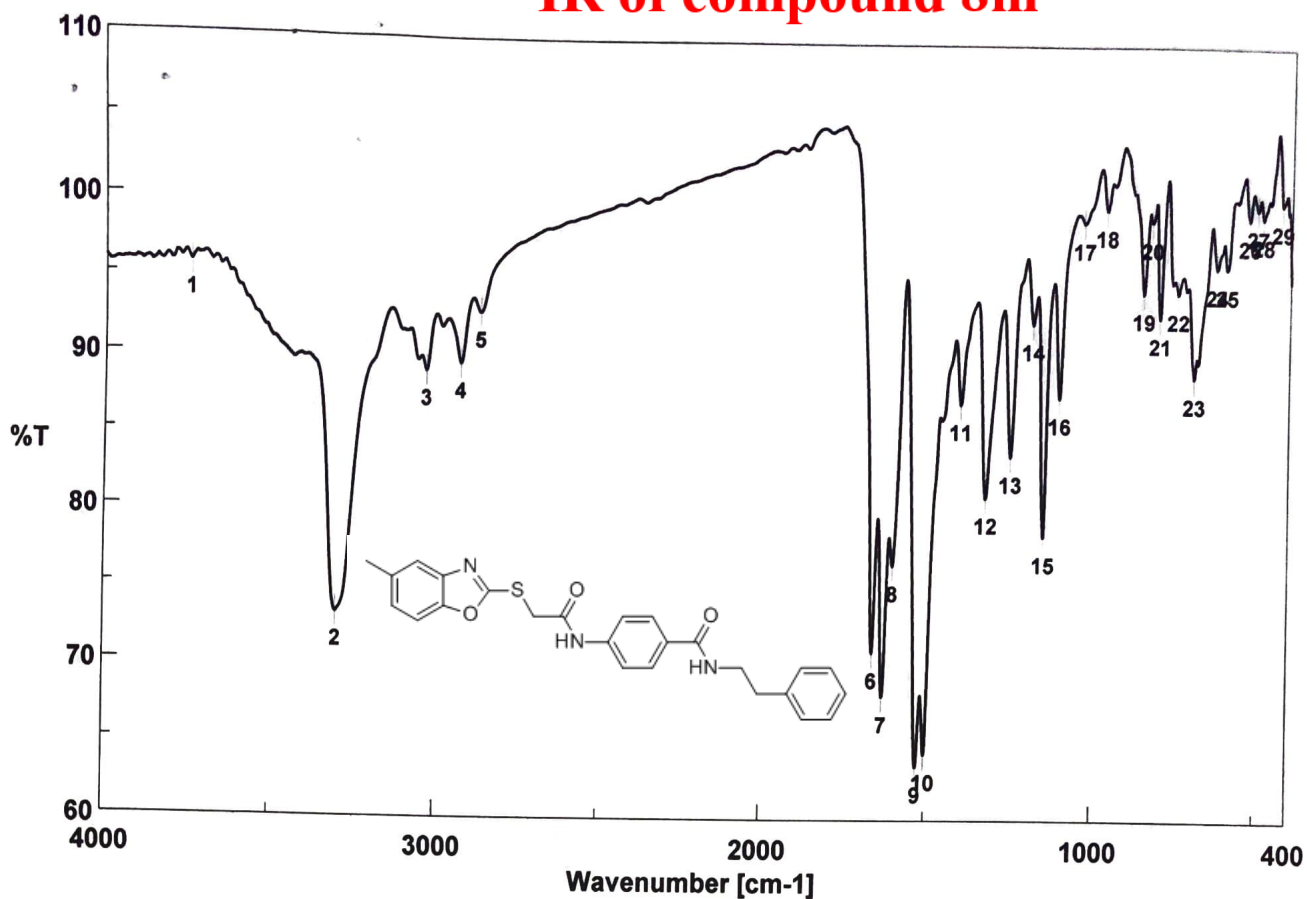

Accumulation 16  
 Resolution 4 cm-1  
 Zero Filling ON  
 Apodization Cosine  
 Gain Auto (2)  
 Scanning Speed Auto (2 mm/sec)  
 Date/Time 8/22/2021 1:52PM  
 Update 8/22/2021 1:52PM  
 Operator IR  
 File Name Memory#89  
 Sample Name MBA - 2  
 Comment

| No. | cm-1    | %T      | No. | cm-1    | %T      | No. | cm-1    | %T      |
|-----|---------|---------|-----|---------|---------|-----|---------|---------|
| 1   | 3741.23 | 95.7779 | 2   | 3298.64 | 73.1612 | 3   | 3028.66 | 88.7631 |
| 4   | 2924.52 | 89.2394 | 5   | 2865.7  | 92.5444 | 6   | 1663.3  | 70.8259 |
| 7   | 1631.48 | 67.9838 | 8   | 1604.48 | 76.447  | 9   | 1526.38 | 63.4715 |
| 10  | 1502.28 | 64.2702 | 11  | 1402.96 | 86.9294 | 12  | 1325.82 | 80.8762 |
| 13  | 1252.54 | 83.5463 | 14  | 1186.01 | 92.1552 | 15  | 1151.29 | 78.369  |
| 16  | 1105.01 | 87.3948 | 17  | 1033.66 | 98.7319 | 18  | 965.198 | 99.5629 |
| 19  | 850.454 | 94.2256 | 20  | 826.348 | 98.8325 | 21  | 799.35  | 92.63   |
| 22  | 745.352 | 94.2316 | 23  | 693.284 | 88.7729 | 24  | 626.752 | 95.8525 |
| 25  | 596.861 | 95.8591 | 26  | 530.328 | 99.0161 | 27  | 505.258 | 99.6365 |
| 28  | 487.902 | 99.1183 | 29  | 430.048 | 99.9755 |     |         |         |

خاتمه  
 هبة

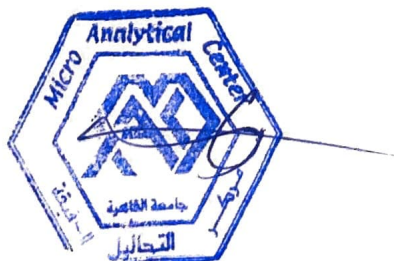

### <sup>1</sup>H NMR of compound 8m

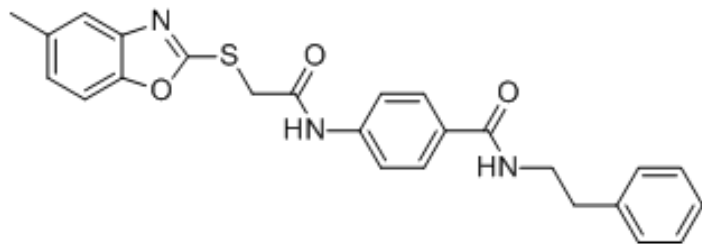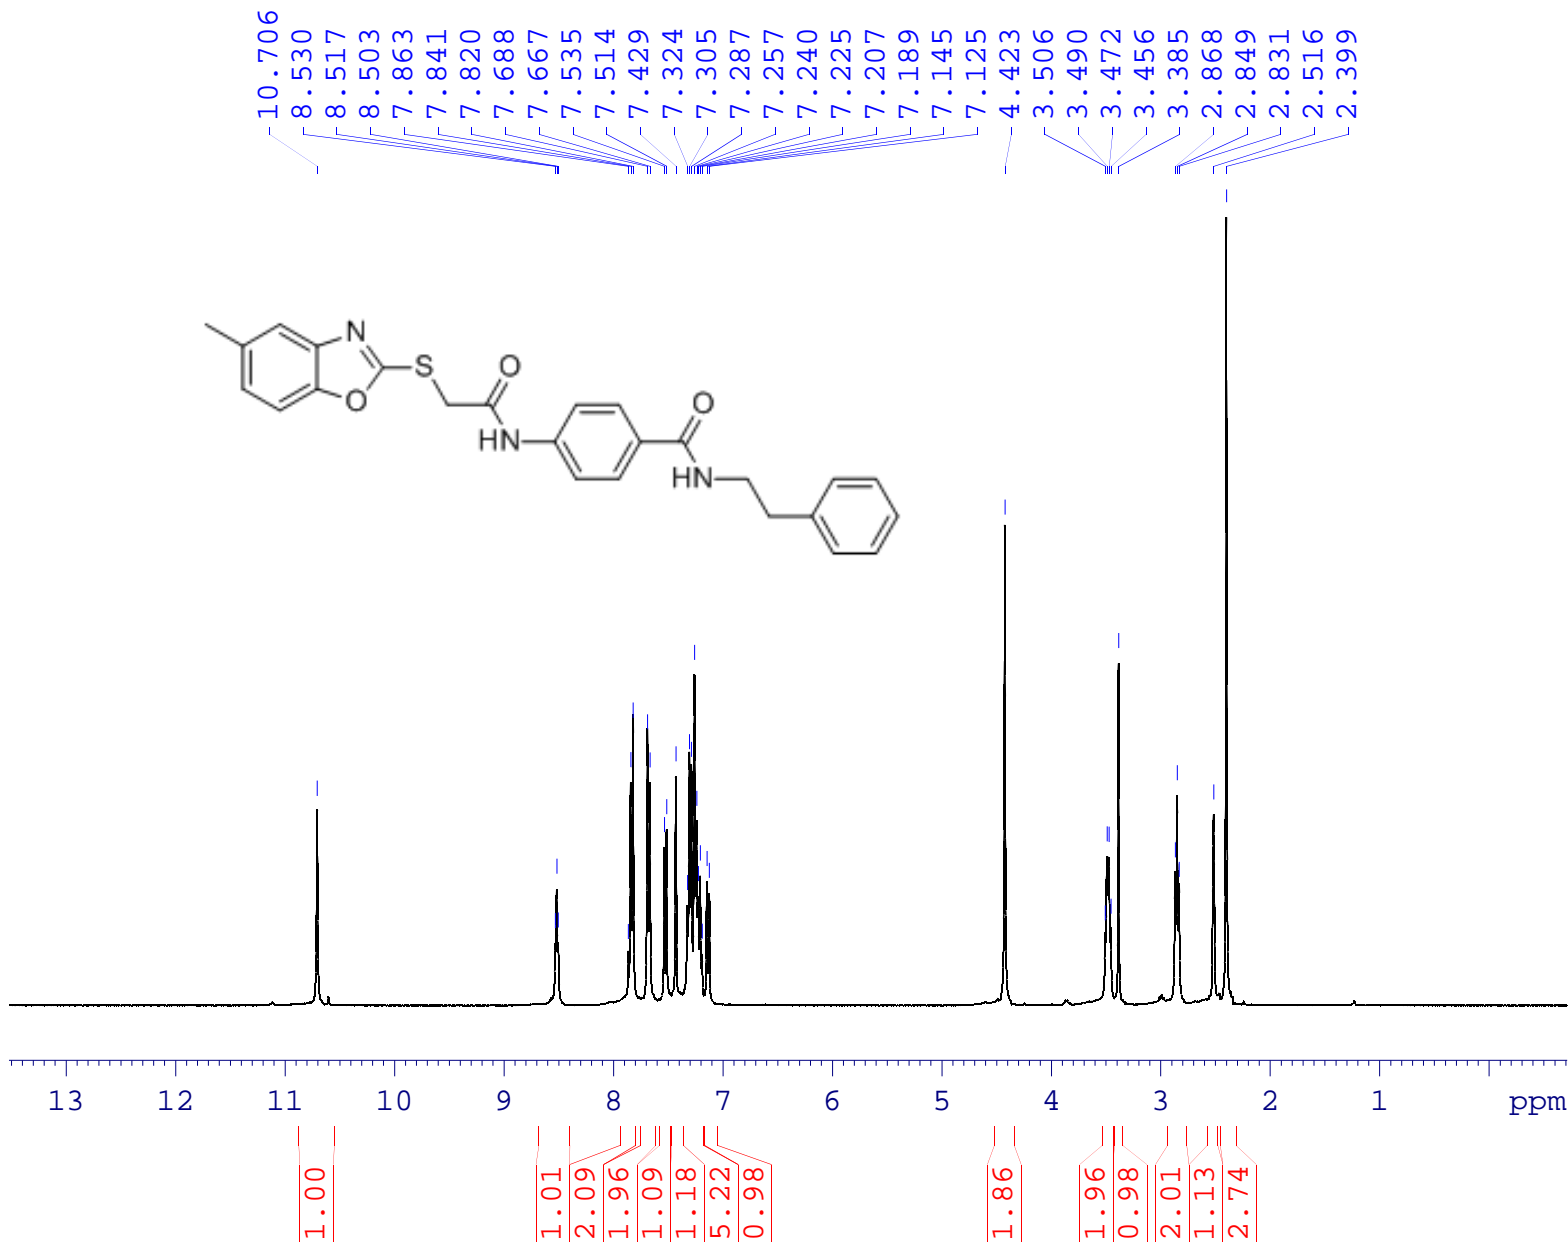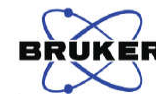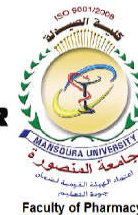

```
Current Data Parameters
NAME      Ibrahim Eissa- MBA-2-proton-DMSO-D
EXPNO          10
PROCNO         1
```

## F2 - Acquisition Parameters

```

Acquisition Parameters
Date_ 20220111
Time 12.48 h
INSTRUM spect
PROBHD Z108618_0945 (
PULPROG zg30
TD 65536
SOLVENT DMSO
NS 16
DS 2
SWH 8012.820 Hz
FIDRES 0.244532 Hz
AQ 4.0894465 sec
RG 112.56
DW 62.400 usec
DE 6.50 usec
TE 0 K
D1 1.00000000 sec
TD0 1
SF01 400.2024712 MHz
NUC1 1H
P1 13.50 usec
PLW1 13.00000000 W

```

## F2 - Processing parameters

|     |                 |
|-----|-----------------|
| SI  | 65536           |
| SF  | 400.2000000 MHz |
| WDW | EM              |
| SSB | 0               |
| LB  | 0.30 Hz         |
| GB  | 0               |
| PC  | 1.00            |

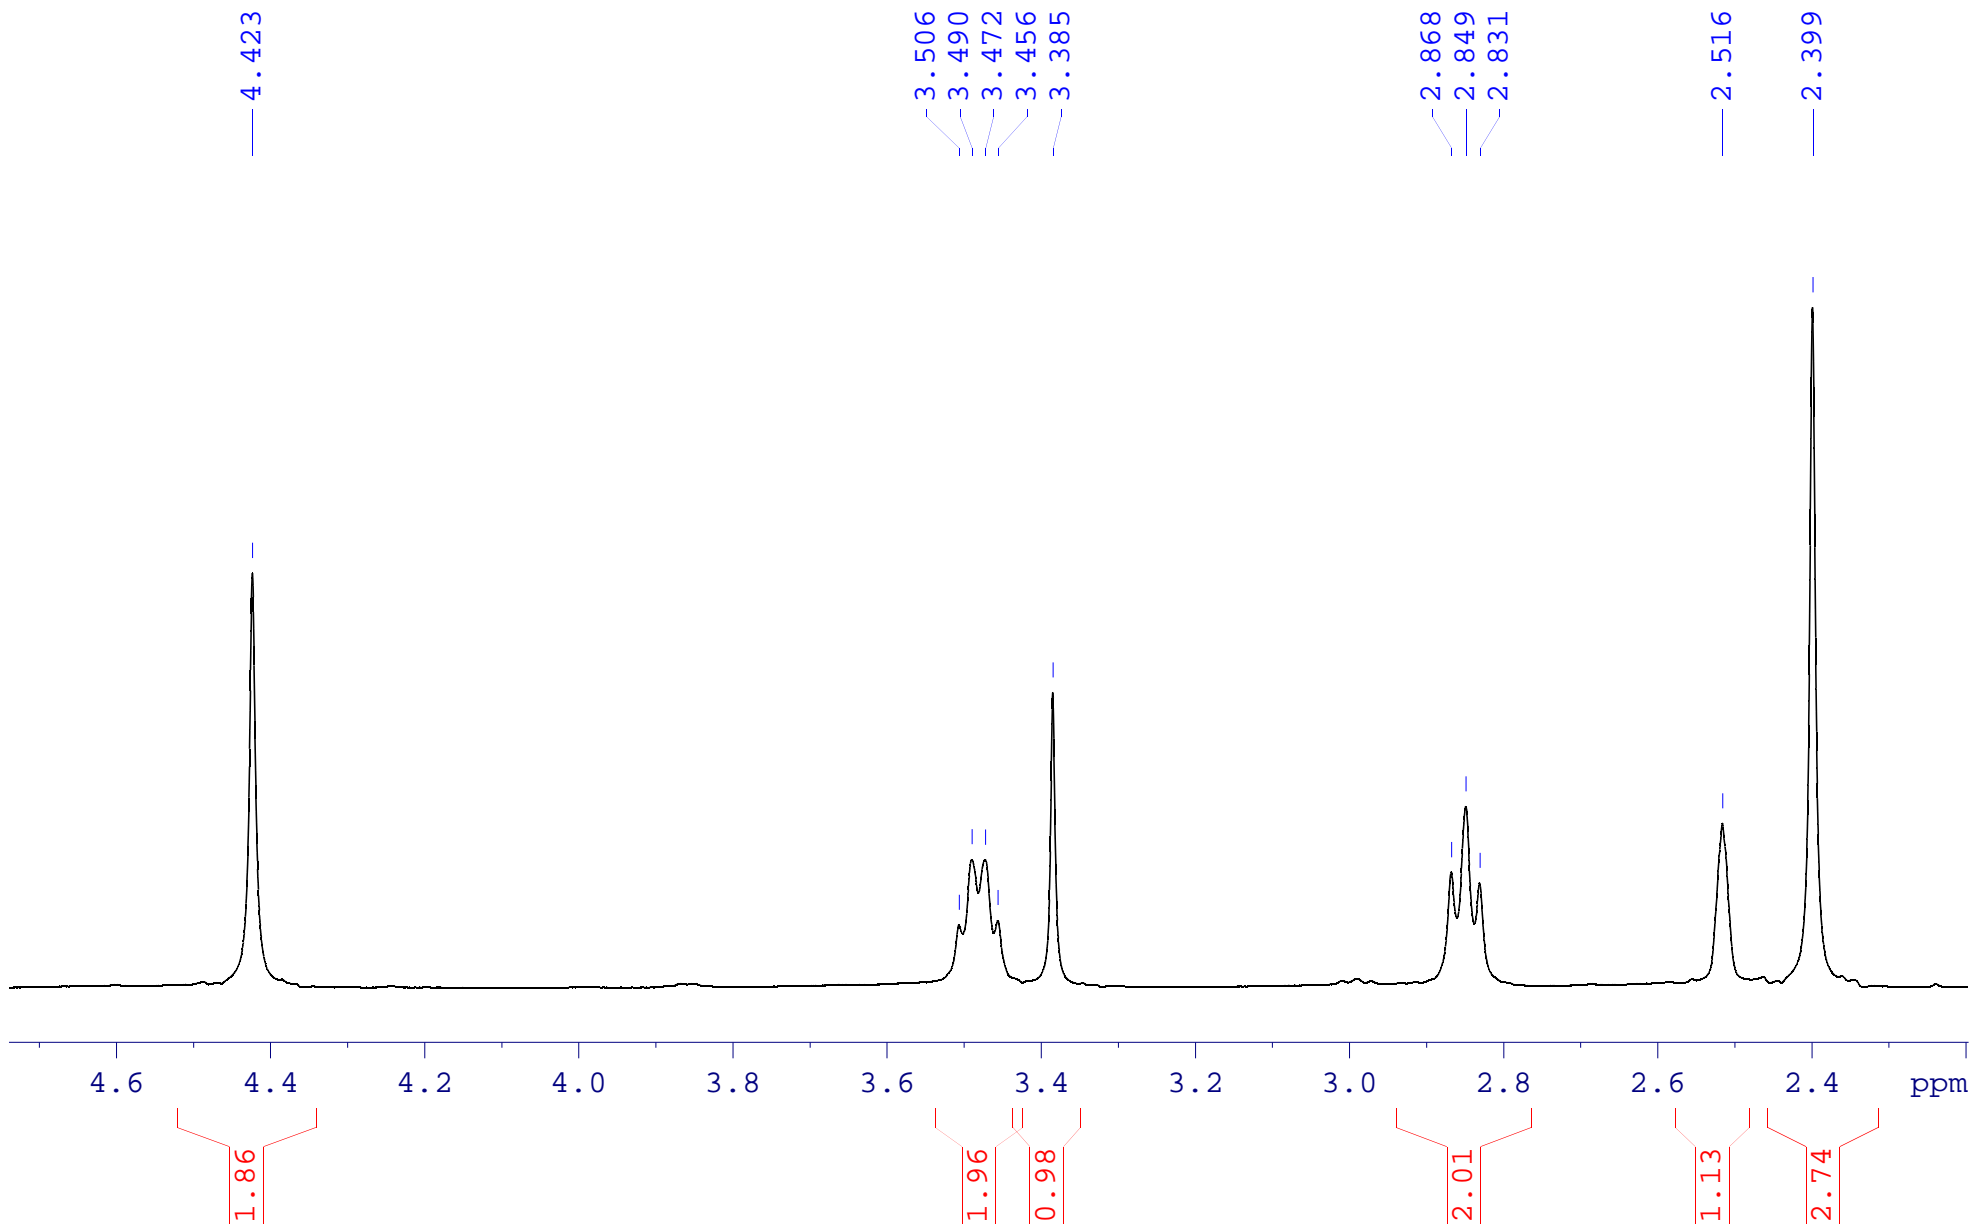



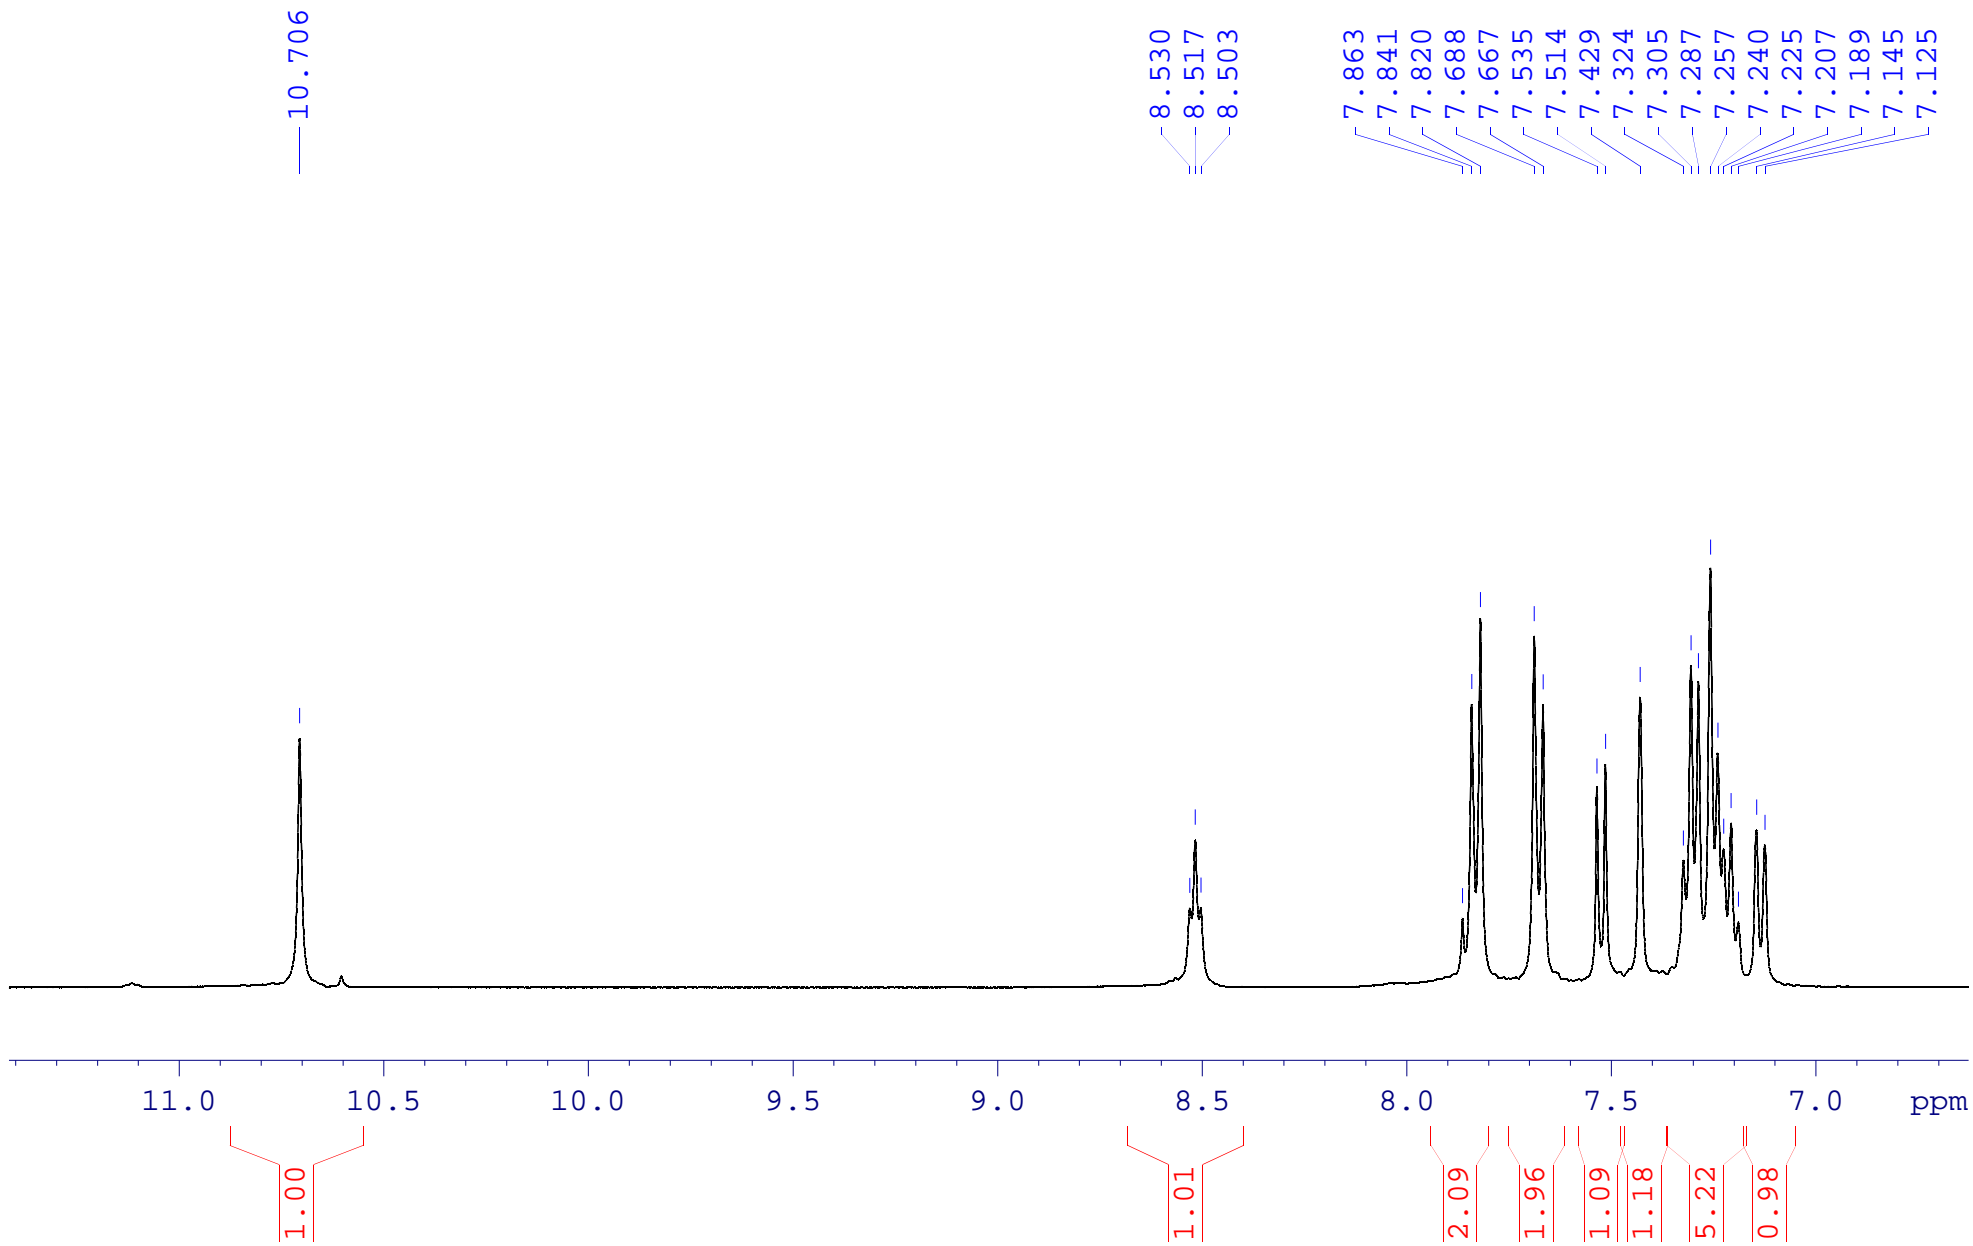

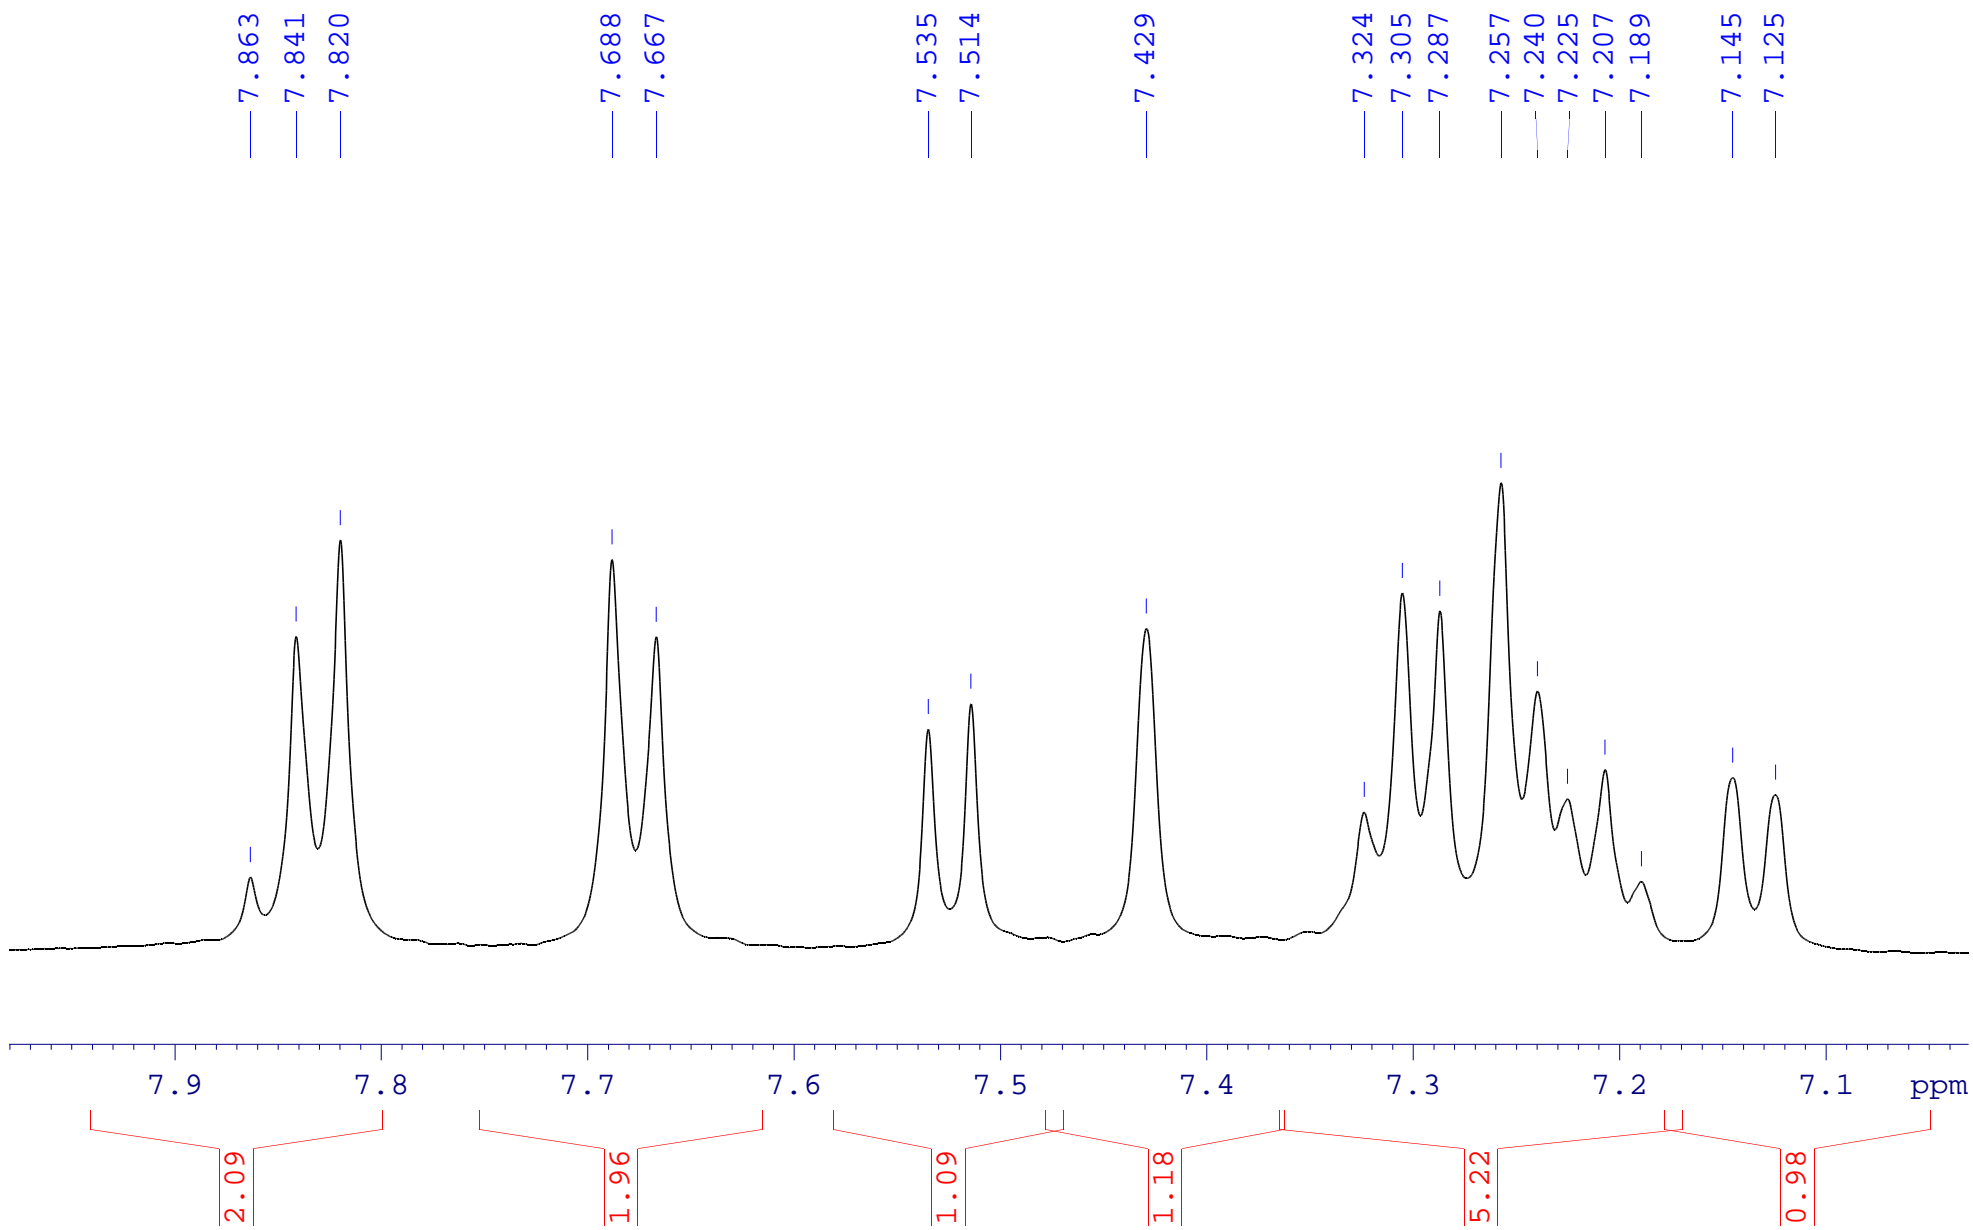

## Cairo University Micro Analytical Center

### DI Analysis Shimadzu Qp-2010 Plus

#### Sample Information

Analyzed by : Dr. Mai Younis  
 Analyzed : 01/01/2007 08:58:14  
 Sample Name : 4  
 Sample ID :  
 Customer Name : Dr. Radwan Saeed - Pharmacy - Helwan  
 Data File : C:\GCMSsolution\Data\Project1\4.QGD  
 Org Data File : C:\GCMSsolution\Data\Project1\4.QGD  
 Method File : C:\GCMSsolution\Data\Project1\High Temperature Op  
 Org Method File : C:\GCMSsolution\Data\Project1\High Temperature Op  
 Report File :  
 Tuning File : C:\GCMSsolution\System\Tune1\_default.qgt  
 \$EndIf\$Modified by : Dr. Mai Younis  
 Modified : 01/01/2007 09:02:41

#### Method

Analytical Line 1  
 IonSourceTemp : 250.00 °C  
 [MS Table]  
 --Group 1 - Event 1--  
 Start Time : 0.00min  
 End Time : 10.00min  
 ACQ Mode : Scan  
 Event Time : 0.50sec  
 Scan Speed : 1250  
 Start m/z : 50.00  
 End m/z : 600.00

Electron Voltage : 70 eV  
 Ionization Mode : EI

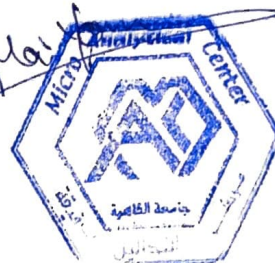

C:\GCMSsolution\Data\Project1\4.QGD

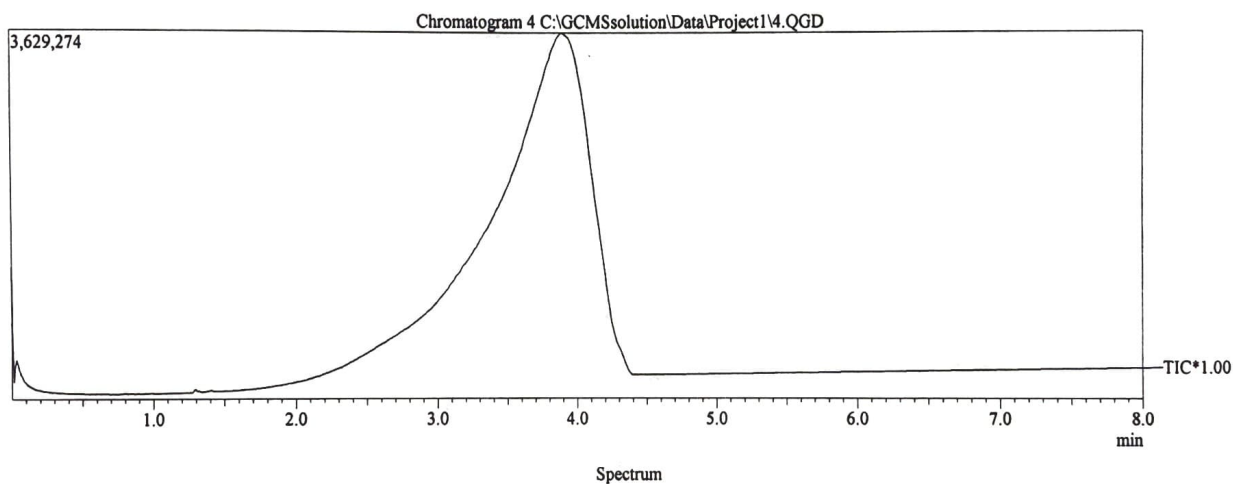

Line#:1 R.Time:3.9(Scan#:466)

MassPeaks:259

RawMode:Single 3.9(466) BasePeak:120(297316)

BG Mode:None Group 1 - Event 1

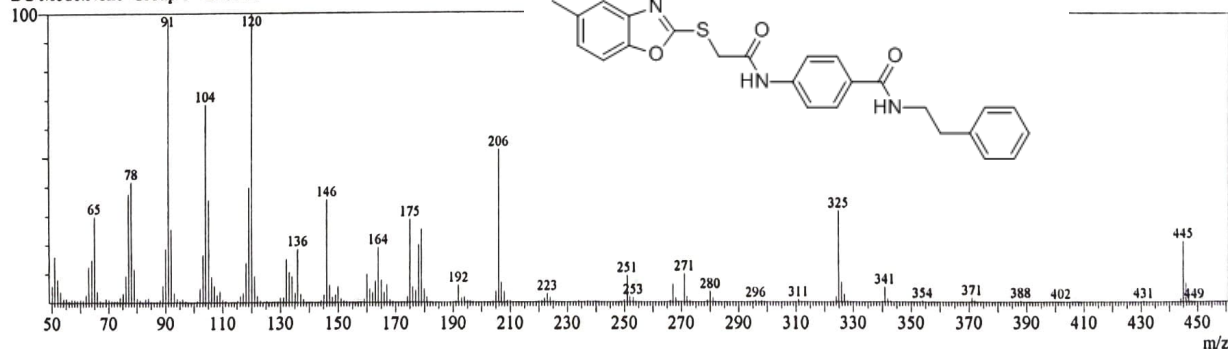

#### Mass Table

Line#:1 R.Time:3.9(Scan#:466)

MassPeaks:259

RawMode:Single 3.9(466) BasePeak:120(297316)

BG Mode:None Group 1 - Event 1

| # | m/z   | Abs. In | Rel. Int. | # | m/z   | Abs. In | Rel. Int. | # | m/z   | Abs. In | Rel. Int. |
|---|-------|---------|-----------|---|-------|---------|-----------|---|-------|---------|-----------|
| 1 | 50.05 | 17293   | 5.82      | 4 | 53.00 | 10993   | 3.70      | 7 | 56.05 | 1805    | 0.61      |
| 2 | 51.00 | 47516   | 15.98     | 5 | 54.05 | 2989    | 1.01      | 8 | 57.05 | 3014    | 1.01      |
| 3 | 52.00 | 24478   | 8.23      | 6 | 55.05 | 3681    | 1.24      | 9 | 58.00 | 2559    | 0.86      |
